# Supplementary material for: Identification of plasma metabolites associated with modifiable risk factors and biomarkers reflecting Alzheimer’s disease pathology
Source: Research Square preprint supplement (doi:10.21203/rs.3.rs-1641665/v1), 2022-06-21
Supplement: Supplementary file 1 [file cfcfd359c13095123527bd92.xlsx]

## Sheet: Article information
Identification of plasma metabolites associated with modifiable risk factors and biomarkers reflecting Alzheimer’s disease pathology Ruocheng Dong1, Diandra N. Denier-Fields1,2, Carol A. Van Hulle3,4, Gwendlyn Kollmorgen5, Ivonne Suridjan6, Norbert Wild6, Qiongshi Lu7, Rozalyn M. Anderson3,8, Henrik Zetterberg9-13, Kaj Blennow9,10, Cynthia M. Carlsson3,4,8, Sterling C. Johnson3,4,8,14, Corinne D.…

## Sheet: Supplemental Table 1
Supplemental Table 1. The missing percentage of each plasma metabolite.
Compound ID	Biochemical Names	Missing %
53	glutamine	0
54	tryptophan	0
55	beta-alanine	0
56	cystine	0
57	glutamate	0
58	glycine	0
59	histidine	0
60	leucine	0
63	cholesterol	0
64	phenylalanine	0
396	glutarate (C5-DC)	0.0543782
443	aspartate	0
512	asparagine	0
513	creatinine	0
514	cytidine	0.0395842
527	lactate	0
528	alpha-ketoglutarate	0
531	3-hydroxy-3-methylglutarate	0.00359856
541	4-hydroxyphenylacetate	0.70092
542	3-hydroxybutyrate (BHBA)	0
554	adenine	0.00319872
555	adenosine	0
566	phenylpyruvate	0.0419832
569	caffeine	0.0539784
573	cytosine	0.555778
575	arabinose	0.09996
587	gluconate	0
590	hypotaurine	0.0979608
594	nicotinamide	0
598	phytanate	0.00039984
601	dihydroorotate	0.00279888
605	uracil	0.116753
606	uridine	0
607	trans-urocanate	0.0115954
1105	linoleate (18:2n6)	0
1107	allantoin	0
1110	arachidonate (20:4n6)	0
1114	deoxycholate	0.0303878
1118	arachidate (20:0)	0
1121	margarate (17:0)	0
1123	inosine	0.0443822
1124	myo-inositol	0
1125	isoleucine	0
1126	alanine	0
1284	threonine	0
1299	tyrosine	0
1301	lysine	0
1302	methionine	0
1303	malate	0
1336	palmitate (16:0)	0
1356	nonadecanoate (19:0)	0
1358	stearate (18:0)	0
1361	pentadecanoate (15:0)	0
1365	myristate (14:0)	0
1417	kynurenate	0
1418	5,6-dihydrothymine	0.00319872
1419	5-methylthioadenosine (MTA)	0
1432	2-hydroxyphenylacetate	0.107557
1437	succinate	0.00079968
1444	pipecolate	0.00079968
1493	ornithine	0
1494	5-oxoproline	0
1496	methylmalonate (MMA)	0.047581
1498	N6,N6,N6-trimethyllysine	0
1505	orotate	0
1508	pantothenate	0
1515	salicylate	0.00119952
1516	sarcosine	0
1549	3-hydroxyisobutyrate	0.00719712
1552	erucate (22:1n9)	0.00239904
1558	4-acetamidobutanoate	0.00519792
1559	5,6-dihydrouracil	0.501
1561	alpha-tocopherol	0
1563	chenodeoxycholate	0.414234
1564	citrate	0
1566	3-aminoisobutyrate	0.00039984
1567	vanillylmandelate (VMA)	0.00079968
1572	glycerate	0
1584	methyl indole-3-acetate	0.185926
1585	N-acetylalanine	0
1587	N-acetylleucine	0.0507797
1589	N-acetylmethionine	0
1591	N-acetylvaline	0.00159936
1600	phosphoethanolamine	0.00479808
1604	urate	0
1638	arginine	0
1642	caprate (10:0)	0
1643	fumarate	0.00839664
1644	heptanoate (7:0)	0.220312
1645	laurate (12:0)	0
1648	serine	0
1649	valine	0
1669	4-hydroxyphenylpyruvate	0.0255898
1670	urea	0
1712	cortisol	0.00039984
1769	cortisone	0.0019992
1806	retinol (Vitamin A)	0
1868	cysteine	0
1898	proline	0
1899	quinolinate	0.04998
2125	taurine	0
2132	citrulline	0
2137	biliverdin	0
2342	serotonin	0.453019
2730	gamma-glutamylglutamine	0
2734	gamma-glutamyltyrosine	0.00239904
2761	thyroxine	0.00039984
2829	N-formylmethionine	0
3127	hypoxanthine	0
3141	betaine	0
3147	xanthine	0
3155	3-ureidopropionate	0.0987605
4968	alpha-ketobutyrate	0.0039984
5086	dimethylglycine	0
5983	corticosterone	0.482207
6146	2-aminoadipate	0.171132
12017	3-methoxytyrosine	0
12032	4-acetamidophenol	0.798481
12129	beta-hydroxyisovalerate	0
12261	taurodeoxycholate	0.119552
15122	glycerol	0
15140	kynurenine	0
15336	tartarate	0.162735
15443	glucuronate	0.00039984
15500	carnitine	0
15506	choline	0
15581	xylose	0.129948
15586	maltose	0.408237
15650	N1-methyladenosine	0
15676	3-methyl-2-oxovalerate	0
15677	3-methylhistidine	0.00519792
15679	xanthurenate	0.0739704
15681	4-guanidinobutanoate	0.0555778
15685	5-hydroxylysine	0.0991603
15705	cystathionine	0.057577
15716	imidazole lactate	0
15720	N-acetylglutamate	0.0535786
15736	4-acetamidophenylglucuronide	0.658936
15745	methylsuccinate	0.0207917
15749	3-phenylpropionate (hydrocinnamate)	0.154738
15753	hippurate	0
15765	ethylmalonate	0
15772	ribitol	0.0139944
15778	benzoate	0.0507797
15990	glycerophosphorylcholine (GPC)	0
17747	sphingosine	0.059976
17769	sphinganine	0.243902
17805	dihomo-linoleate (20:2n6)	0
17945	2-hydroxystearate	0
18245	gamma-glutamylhistidine	0
18254	paraxanthine	0.156737
18280	gentisate	0.0603758
18281	2-hydroxyhippurate (salicylurate)	0.00559776
18335	quinate	0.0163934
18349	indolelactate	0
18368	cys-gly, oxidized	0.0615754
18369	gamma-glutamylleucine	0
18374	methionine sulfoxide	0
18392	theobromine	0.00919632
18394	theophylline	0.0679728
18467	eicosapentaenoate (EPA; 20:5n3)	0
18476	glycocholate	0.00559776
18477	glycodeoxycholate	0.148341
18494	taurochenodeoxycholate	0.087565
18497	taurocholate	0.240704
19130	1,2-dipalmitoyl-GPC (16:0/16:0)	0
19258	1-myristoyl-2-palmitoyl-GPC (14:0/16:0)	0
19263	1-palmitoyl-2-oleoyl-GPE (16:0/18:1)	0.00559776
19324	1-stearoyl-GPI (18:0)	0
19503	stearoyl sphingomyelin (d18:1/18:0)	0
20675	1,5-anhydroglucitol (1,5-AG)	0.00079968
20676	maleate	0.0479808
20693	tartronate (hydroxymalonate)	0.00239904
20694	oxalate (ethanedioate)	0.00039984
20699	erythritol	0
21025	iminodiacetate (IDA)	0
21151	saccharin	0.435026
21184	1-oleoylglycerol (18:1)	0.0347861
22001	3-hydroxyoctanoate	0.00079968
22036	2-hydroxyoctanoate	0.0219912
22053	3-hydroxydecanoate	0
22116	4-methyl-2-oxopentanoate	0
22130	phenyllactate (PLA)	0
22132	alpha-hydroxyisocaproate	0.00119952
22137	homoarginine	0
22138	homocitrulline	0.0503798
22163	EDTA	0.00039984
22176	cysteine s-sulfate	0
22185	N-acetylaspartate (NAA)	0.00039984
22842	cholate	0.123151
27447	1-linoleoylglycerol (18:2)	0.0179928
27513	indoleacetate	0
27665	1-methylnicotinamide	0
27672	3-indoxyl sulfate	0
27710	N-acetylglycine	0
27718	creatine	0
27719	galactonate	0.184726
27731	ribonate	0
27738	threonate	0
30460	1-methylhistidine	0.00559776
31536	N-(2-furoyl)glycine	0.27509
31555	pyridoxate	0
31591	androsterone sulfate	0.00239904
31787	3-carboxy-4-methyl-5-propyl-2-furanpropanoate (CMPF)	0
31904	7-ketodeoxycholate	0.787685
31912	glycolithocholate	0.304278
31932	propionylglycine	0.0967613
31938	5-hydroxyhexanoate	0.259896
31943	3-hydroxysebacate	0.119152
32197	3-(4-hydroxyphenyl)lactate	0
32198	acetylcarnitine (C2)	0
32306	trans-4-hydroxyproline	0
32328	hexanoylcarnitine (C6)	0
32342	adenosine 5'-monophosphate (AMP)	0.144342
32346	glycochenodeoxycholate	0.00559776
32350	1-methyl-4-imidazoleacetate	0
32377	N-acetylneuraminate	0
32388	dodecanedioate (C12-DC)	0.012395
32390	N-acetyltyrosine	0.0947621
32391	1,3-dimethylurate	0.164334
32397	3-hydroxy-2-ethylpropionate	0
32401	trigonelline (N'-methylnicotinate)	0
32405	indolepropionate	0.00719712
32412	butyrylcarnitine (C4)	0.00319872
32415	docosadienoate (22:2n6)	0.00039984
32418	myristoleate (14:1n5)	0
32425	dehydroisoandrosterone sulfate (DHEA-S)	0.00119952
32426	I-urobilinogen	0.658936
32445	3-methylxanthine	0.0467813
32446	guanidinosuccinate	0.384246
32452	propionylcarnitine (C3)	0
32457	3-hydroxylaurate	0.00119952
32489	caproate (6:0)	0.00519792
32492	caprylate (8:0)	0.0967613
32497	10-undecenoate (11:1n1)	0
32504	docosapentaenoate (n3 DPA; 22:5n3)	0
32506	2-linoleoylglycerol (18:2)	0.433826
32553	phenol sulfate	0
32562	pregnen-diol disulfate C21H34O8S2*	0
32586	bilirubin (E,E)*	0
32619	pregn steroid monosulfate C21H34O5S*	0
32620	glycolithocholate sulfate*	0.00159936
32807	taurocholenate sulfate	0.00039984
32827	andro steroid monosulfate C19H28O6S (1)*	0.167933
32980	adrenate (22:4n6)	0.0187925
33009	homostachydrine*	0.0379848
33173	2-hydroxyacetaminophen sulfate*	0.646142
33228	1-arachidonoyl-GPC (20:4n6)*	0
33230	1-palmitoleoyl-GPC (16:1)*	0
33364	gamma-glutamylthreonine	0
33384	salicyluric glucuronide*	0.412635
33422	gamma-glutamylphenylalanine	0
33441	isobutyrylcarnitine (C4)	0.00039984
33442	pseudouridine	0
33447	palmitoleate (16:1n7)	0
33487	glutamate, gamma-methyl ester	0.0967613
33587	eicosenoate (20:1)	0
33934	gamma-glutamyl-epsilon-lysine	0.0227909
33935	piperine	0.0059976
33936	octanoylcarnitine (C8)	0
33937	alpha-hydroxyisovalerate	0
33939	N-acetylthreonine	0.00279888
33941	decanoylcarnitine (C10)	0
33942	N-acetylasparagine	0
33943	N-acetylglutamine	0.00879648
33946	N-acetylhistidine	0.0135946
33947	gamma-glutamyltryptophan	0.257097
33949	gamma-glutamylglycine	0
33950	N-acetylphenylalanine	0.0135946
33952	myristoylcarnitine (C14)	0
33953	N-acetylarginine	0
33955	1-palmitoyl-GPC (16:0)	0
33959	N-acetyltryptophan	0.0135946
33961	1-stearoyl-GPC (18:0)	0
33963	acetoacetate	0.30028
33967	N-acetylisoleucine	0.059976
33968	5-dodecenoate (12:1n7)	0.0019992
33969	stearidonate (18:4n3)	0.00279888
33971	10-heptadecenoate (17:1n7)	0
33972	10-nonadecenoate (19:1n9)	0
33973	epiandrosterone sulfate	0.00519792
33983	tauro-beta-muricholate	0.539784
34035	linolenate [alpha or gamma; (18:3n3 or 6)]	0
34214	1-arachidonoyl-GPI (20:4)*	0
34384	stachydrine	0
34389	1-methylxanthine	0.147541
34390	7-methylxanthine	0.0771691
34395	1-methylurate	0.289484
34396	choline phosphate	0.0119952
34397	1-arachidonylglycerol (20:4)	0.246301
34399	3,7-dimethylurate	0.197121
34400	1,7-dimethylurate	0.0439824
34401	5-acetylamino-6-formylamino-3-methyluracil	0.176729
34404	1,3,7-trimethylurate	0.241903
34407	isovalerylcarnitine (C5)	0
34409	stearoylcarnitine (C18)	0
34419	1-linoleoyl-GPC (18:2)	0
34424	5-acetylamino-6-amino-3-methyluracil	0.0315874
34445	sphingosine 1-phosphate	0
34457	gamma-glutamylisoleucine*	0.0079968
34534	laurylcarnitine (C12)	0
35101	beta-guanidinopropanoate	0.440224
35107	isovalerylglycine	0.271092
35114	7-methylguanine	0
35126	phenylacetylglutamine	0
35127	pro-hydroxy-pro	0.00039984
35130	N4-acetylcytidine	0.113954
35132	3-methylcytidine	0.012395
35136	5-methyluridine (ribothymidine)	0
35137	N2,N2-dimethylguanosine	0
35157	N6-carbamoylthreonyladenosine	0.00519792
35159	cysteine-glutathione disulfide	0.0139944
35160	oleoylcarnitine (C18:1)	0
35172	orotidine	0.00119952
35186	1-arachidonoyl-GPE (20:4n6)*	0
35253	2-palmitoyl-GPC (16:0)*	0
35305	1-palmitoyl-GPI (16:0)	0.0479808
35320	catechol sulfate	0
35322	hydroquinone sulfate	0.236705
35436	hexanoylglycine	0.398641
35527	4-hydroxyhippurate	0
35628	1-oleoyl-GPE (18:1)	0.00039984
35631	1-palmitoyl-GPE (16:0)	0
35635	3-(3-hydroxyphenyl)propionate	0.445822
35637	cysteinylglycine	0.0159936
35651	ectoine	0.0587765
35669	tetradecanedioate (C14-DC)	0.0155938
35675	2-hydroxypalmitate	0
35678	hexadecanedioate (C16-DC)	0.00159936
35718	dihomo-linolenate (20:3n3 or n6)	0
36095	thymol sulfate	0.0431827
36098	4-vinylphenol sulfate	0.00079968
36099	4-ethylphenylsulfate	0.00239904
36103	p-cresol sulfate	0
36594	1-linoleoyl-GPI (18:2)*	0
36600	1-linoleoyl-GPE (18:2)*	0
36602	1-oleoyl-GPI (18:1)*	0.0203918
36738	gamma-glutamylglutamate	0.0115954
36746	2-hydroxy-3-methylvalerate	0.00039984
36747	deoxycarnitine	0
36751	N2-acetyllysine	0.463015
36752	N6-acetyllysine	0
36754	octadecanedioate (C18-DC)	0.0451819
36776	7-alpha-hydroxy-3-oxo-4-cholestenoate (7-Hoca)	0
36808	dimethylarginine (SDMA + ADMA)	0
36845	o-cresol sulfate	0.411835
36850	taurolithocholate 3-sulfate	0.0191923
37058	succinylcarnitine (C4-DC)	0
37059	malonylcarnitine	0.236705
37063	gamma-glutamylalanine	0.00759696
37076	N-acetylserine	0
37097	tryptophan betaine	0.00159936
37112	chiro-inositol	0.655738
37181	4-allylphenol sulfate	0.00359856
37183	5alpha-androstan-3alpha,17alpha-diol monosulfate	0.609356
37184	5alpha-androstan-3alpha,17beta-diol disulfate	0.567373
37185	5alpha-androstan-3alpha,17beta-diol monosulfate (2)	0.705718
37186	5alpha-androstan-3alpha,17beta-diol monosulfate (1)	0.162335
37187	5alpha-androstan-3beta,17alpha-diol disulfate	0.264294
37190	5alpha-androstan-3beta,17beta-diol disulfate	0.0119952
37192	5alpha-androstan-3beta,17beta-diol monosulfate (2)	0.272291
37196	5alpha-pregnan-3beta,20beta-diol monosulfate (1)	0.12395
37198	5alpha-pregnan-3beta,20alpha-diol disulfate	0.0139944
37200	5alpha-pregnan-3beta,20alpha-diol monosulfate (2)	0.042383
37202	androstenediol (3beta,17beta) disulfate (1)	0.00079968
37203	androstenediol (3beta,17beta) disulfate (2)	0.0019992
37207	androstenediol (3alpha, 17alpha) monosulfate (2)	0.117153
37209	androstenediol (3alpha, 17alpha) monosulfate (3)	0.0119952
37210	androstenediol (3beta,17beta) monosulfate (2)	0.0451819
37211	androstenediol (3beta,17beta) monosulfate (1)	0.0079968
37253	2-hydroxyglutarate	0.0155938
37431	N-methylproline	0
37432	N-acetyl-beta-alanine	0.0207917
37443	cysteine sulfinic acid	0.34906
37445	4-hydroxycoumarin	0.229908
37455	glycerophosphoethanolamine	0
37459	ergothioneine	0.00039984
37475	4-acetaminophen sulfate	0.561375
37478	docosapentaenoate (n6 DPA; 22:5n6)	0.0835666
37482	17alpha-hydroxypregnenolone 3-sulfate	0.778489
37496	N-acetylputrescine	0
37506	palmitoyl sphingomyelin (d18:1/16:0)	0
37529	sphingomyelin (d18:1/18:1, d18:2/18:0)	0
37752	13-HODE + 9-HODE	0.0151939
38100	betonicine	0.333467
38102	oleoyl ethanolamide	0.00759696
38116	indole-3-carboxylic acid	0.159936
38125	4-cholesten-3-one	0.148341
38127	S-methylmethionine	0.417433
38165	palmitoyl ethanolamide	0
38168	16a-hydroxy DHEA 3-sulfate	0.00439824
38170	pregnenolone sulfate	0.0831667
38178	cis-4-decenoylcarnitine (C10:1)	0
38276	2,3-dihydroxyisovalerate	0.00759696
38296	17-methylstearate (i19:0)	0
38395	12,13-DiHOME	0.286285
38399	9,10-DiHOME	0.431028
38625	stearoyl ethanolamide	0.00039984
38637	cinnamoylglycine	0.0771691
38768	15-methylpalmitate (i17:0)	0.0367853
39270	1-(1-enyl-palmitoyl)-GPE (P-16:0)*	0
39271	1-(1-enyl-stearoyl)-GPE (P-18:0)*	0
39346	alpha-CEHC glucuronide*	0.530588
39378	tauroursodeoxycholate	0.696921
39379	glycoursodeoxycholate	0.00559776
39592	S-methylcysteine	0
39598	7-methylurate	0.203119
39600	3-hydroxyhippurate	0.00519792
39603	ethyl glucuronide	0.636146
39609	16-hydroxypalmitate	0.00039984
39732	N-oleoyltaurine	0.218713
39788	solanidine	0.677729
39789	glycyrrhetinate	0.786086
39831	eicosanodioate (C20-DC)	0
39837	docosadioate (C22-DC)	0.00479808
40007	carboxyethyl-GABA	0.012395
40062	4-hydroxy-2-oxoglutaric acid	0.0331867
40173	L-urobilin	0.576969
40406	trimethylamine N-oxide	0
40469	N1-Methyl-2-pyridone-5-carboxamide	0
40473	hydantoin-5-propionic acid	0.0103958
40479	2-oxindole-3-acetate	0.423431
40481	dihydroferulic acid	0.638145
40703	prolylglycine	0.0919632
40708	pregnanediol-3-glucuronide	0.0527789
40730	imidazole propionate	0.0195922
41220	2-stearoyl-GPE (18:0)*	0.00039984
41494	alliin	0.311875
41754	heme	0.114754
41888	succinimide	0.0227909
42002	lanthionine	0.309876
42087	indoleacetylglutamine	0.20112
42092	N-palmitoylglycine	0.00359856
42109	phosphate	0
42370	S-1-pyrroline-5-carboxylate	0.00159936
42374	2-aminobutyrate	0
42381	gamma-CEHC glucuronide*	0.148741
42382	S-adenosylhomocysteine (SAH)	0.277889
42398	1-stearoyl-GPE (18:0)	0
42420	erythronate*	0
42446	1-palmitoyl-2-linoleoyl-GPC (16:0/18:2)	0
42448	1-stearoyl-2-oleoyl-GPE (18:0/18:1)	0
42449	1-palmitoyl-2-linoleoyl-GPE (16:0/18:2)	0
42450	1-stearoyl-2-arachidonoyl-GPC (18:0/20:4)	0
42459	sphingomyelin (d18:2/16:0, d18:1/16:1)*	0
42463	sphingomyelin (d18:1/14:0, d16:1/16:0)*	0
42489	2-hydroxydecanoate	0
42574	glycohyocholate	0.285086
42989	N-methyltaurine	0.469412
43231	6-oxopiperidine-2-carboxylate	0.127549
43239	S-allylcysteine	0.155538
43249	N-delta-acetylornithine	0
43255	N-acetyl-1-methylhistidine*	0.017593
43256	N-acetyl-3-methylhistidine*	0.260696
43258	acisoga	0.201519
43264	3-hydroxybutyrylcarnitine (1)	0.183926
43266	2-aminophenol sulfate	0.0147941
43343	2-aminooctanoate	0.00079968
43374	indolin-2-one	0.141943
43378	S-methylcysteine sulfoxide	0
43400	2-piperidinone	0
43424	dimethyl sulfone	0.0603758
43488	N-acetylcarnosine	0.00079968
43493	formiminoglutamate	0.0651739
43507	3b-hydroxy-5-cholenoic acid	0.489804
43549	N-formylanthranilic acid	0.132747
43582	5-(galactosylhydroxy)-L-lysine	0.00639744
43591	N2,N5-diacetylornithine	0.0563774
43761	2-aminoheptanoate	0.00559776
43802	guanidinoacetate	0
43807	bilirubin (Z,Z)	0
43829	gamma-glutamylvaline	0.0019992
43847	glycerol 3-phosphate	0.0287885
44526	3-methyl-2-oxobutyrate	0
44618	3-methoxytyramine sulfate	0.621751
44620	4-acetylphenol sulfate	0.514194
44621	1-(1-enyl-oleoyl)-GPE (P-18:1)*	0.0235906
44656	isovalerate (i5:0)	0.0195922
44664	glutarylcarnitine (C5-DC)	0.0019992
44675	docosahexaenoate (DHA; 22:6n3)	0
44681	palmitoylcarnitine (C16)	0
44688	maltotriose	0.636945
44872	gamma-glutamylmethionine	0
44876	gamma-CEHC	0.00119952
44877	N-palmitoyl-sphingosine (d18:1/16:0)	0
44878	methionine sulfone	0
45095	2-methylbutyrylcarnitine (C5)	0.0387845
45404	N-acetylalliin	0.264694
45413	O-sulfo-L-tyrosine	0
45415	3-(3-hydroxyphenyl)propionate sulfate	0.331867
45951	1-linolenoyl-GPC (18:3)*	0
45968	1-oleoyl-GPG (18:1)*	0.40064
46111	guaiacol sulfate	0
46115	21-hydroxypregnenolone disulfate	0.00639744
46142	mannitol/sorbitol	0
46144	methyl glucopyranoside (alpha + beta)	0.0839664
46146	4-methylcatechol sulfate	0.00039984
46165	3-methyl catechol sulfate (1)	0.0239904
46172	5alpha-pregnan-3(alpha or beta),20beta-diol disulfate	0.576569
46173	aconitate [cis or trans]	0
46223	linoleoylcarnitine (C18:2)*	0
46225	pyroglutamine*	0
46539	N-acetylglucosamine/N-acetylgalactosamine	0.304678
46548	3-methylglutarylcarnitine (2)	0.00359856
46798	oleoyl-linoleoyl-glycerol (18:1/18:2) [1]	0
46799	oleoyl-linoleoyl-glycerol (18:1/18:2) [2]	0
46957	gulonate*	0.00879648
46960	sulfate*	0
47101	N-methylpipecolate	0.0615754
47112	etiocholanolone glucuronide	0.0655738
47114	ferulic acid 4-sulfate	0.796881
47120	9-hydroxystearate	0.0403838
47132	5alpha-androstan-3alpha,17beta-diol 17-glucuronide	0.704118
47135	11-ketoetiocholanolone glucuronide	0.291084
47136	N-acetyl-S-allyl-L-cysteine	0.766893
47153	sphingomyelin (d18:1/24:1, d18:2/24:0)*	0
47154	sphingomyelin (d18:2/14:0, d18:1/14:1)*	0
47666	alpha-CEHC sulfate	0.395442
47886	bilirubin (E,Z or Z,E)*	0
48114	1-methylguanidine	0.564174
48130	N6-succinyladenosine	0.292683
48149	N-acetylglucosaminylasparagine	0.0779688
48152	glucose	0
48153	mannose	0
48182	myristoleoylcarnitine (C14:1)*	0
48187	N-acetyltaurine	0.0331867
48195	fructose	0
48255	arabonate/xylonate	0
48258	1-oleoyl-GPC (18:1)	0
48351	N1-methylinosine	0.00479808
48394	pregnanolone/allopregnanolone sulfate	0.781687
48404	dimethyl sulfoxide (DMSO)	0.0663735
48407	dopamine 3-O-sulfate	0.00039984
48408	tyramine O-sulfate	0.171531
48425	phenylacetylcarnitine	0.15074
48428	pyrraline	0.117153
48429	methyl-4-hydroxybenzoate sulfate	0.0279888
48433	N-formylphenylalanine	0.251899
48434	N-acetylcitrulline	0.220712
48441	4-hydroxychlorothalonil	0
48442	4-vinylguaiacol sulfate	0.734506
48448	3-hydroxypyridine sulfate	0.0107957
48460	propyl 4-hydroxybenzoate sulfate	0.443822
48490	sphingomyelin (d18:1/20:0, d16:1/22:0)*	0
48491	sphingomyelin (d18:1/20:1, d18:2/20:0)*	0
48492	behenoyl sphingomyelin (d18:1/22:0)*	0
48493	sphingomyelin (d18:1/22:1, d18:2/22:0, d16:1/24:1)*	0
48569	acesulfame	0.512995
48580	2-acetamidophenol sulfate	0.527389
48674	umbelliferone sulfate	0.480208
48693	3-acetylphenol sulfate	0.632547
48698	6-hydroxyindole sulfate	0.00119952
48715	eugenol sulfate	0.264694
48757	N-acetylkynurenine (2)	0.377449
48762	1,2,3-benzenetriol sulfate (2)	0.391443
48763	3-methoxycatechol sulfate (1)	0.194722
48782	C-glycosyltryptophan	0
48841	p-cresol-glucuronide*	0.0259896
48885	arabitol/xylitol	0
48990	pyruvate	0
48997	isoeugenol sulfate	0.727709
49617	1-lignoceroyl-GPC (24:0)	0.00079968
52234	glycosyl-N-stearoyl-sphingosine (d18:1/18:0)	0.00279888
52281	2-hydroxybutyrate/2-hydroxyisobutyrate	0
52285	oleate/vaccenate (18:1)	0
52340	N-carbamoylalanine	0.389044
52431	1-palmitoleoylglycerol (16:1)*	0.222311
52433	sphingomyelin (d17:1/16:0, d18:1/15:0, d16:1/17:0)*	0
52434	palmitoyl dihydrosphingomyelin (d18:0/16:0)*	0
52435	sphingomyelin (d18:2/23:0, d18:1/23:1, d17:1/24:1)*	0
52436	tricosanoyl sphingomyelin (d18:1/23:0)*	0
52437	sphingomyelin (d18:2/24:1, d18:1/24:2)*	0
52438	1-stearoyl-2-oleoyl-GPC (18:0/18:1)	0
52446	1-stearoyl-2-linoleoyl-GPE (18:0/18:2)*	0
52447	1-stearoyl-2-arachidonoyl-GPE (18:0/20:4)	0
52449	1-stearoyl-2-arachidonoyl-GPI (18:0/20:4)	0
52450	1-palmitoyl-2-linoleoyl-GPI (16:0/18:2)	0.0191923
52452	1-stearoyl-2-linoleoyl-GPC (18:0/18:2)*	0
52454	1-palmitoyl-2-dihomo-linolenoyl-GPC (16:0/20:3n3 or 6)*	0
52461	1-palmitoyl-2-oleoyl-GPC (16:0/18:1)	0
52462	1-palmitoyl-2-arachidonoyl-GPC (16:0/20:4n6)	0
52464	1-palmitoyl-2-arachidonoyl-GPE (16:0/20:4)*	0
52465	1-palmitoyl-2-docosahexaenoyl-GPE (16:0/22:6)*	0.00039984
52466	1-stearoyl-2-docosahexaenoyl-GPE (18:0/22:6)*	0.00439824
52467	1-palmitoyl-2-arachidonoyl-GPI (16:0/20:4)*	0.0115954
52468	1-stearoyl-2-linoleoyl-GPI (18:0/18:2)	0.00039984
52470	1-palmitoyl-2-palmitoleoyl-GPC (16:0/16:1)*	0
52473	gamma-tocopherol/beta-tocopherol	0
52474	1-(1-enyl-palmitoyl)-GPC (P-16:0)*	0
52475	1-(1-enyl-stearoyl)-2-arachidonoyl-GPE (P-18:0/20:4)*	0
52477	1-(1-enyl-palmitoyl)-2-oleoyl-GPE (P-16:0/18:1)*	0.00679728
52478	1-(1-enyl-palmitoyl)-2-oleoyl-GPC (P-16:0/18:1)*	0
52495	sphingomyelin (d18:1/21:0, d17:1/22:0, d16:1/23:0)*	0
52602	2'-deoxyuridine	0.0151939
52603	1,2-dilinoleoyl-GPC (18:2/18:2)	0.00159936
52604	N-palmitoyl-sphinganine (d18:0/16:0)	0.0171931
52610	1-palmitoyl-2-docosahexaenoyl-GPC (16:0/22:6)	0
52611	1-stearoyl-2-docosahexaenoyl-GPC (18:0/22:6)	0
52614	1-(1-enyl-stearoyl)-2-oleoyl-GPE (P-18:0/18:1)	0.00639744
52615	sphingomyelin (d18:1/17:0, d17:1/18:0, d19:1/16:0)	0
52616	1-palmitoyl-2-stearoyl-GPC (16:0/18:0)	0.00519792
52623	1-stearoyl-2-oleoyl-GPG (18:0/18:1)	0.00319872
52633	palmitoyl-linoleoyl-glycerol (16:0/18:2) [1]*	0.0703719
52634	palmitoyl-linoleoyl-glycerol (16:0/18:2) [2]*	0.0247901
52669	1-palmitoyl-2-oleoyl-GPI (16:0/18:1)*	0.0263894
52673	1-(1-enyl-palmitoyl)-2-arachidonoyl-GPE (P-16:0/20:4)*	0
52677	1-(1-enyl-palmitoyl)-2-linoleoyl-GPE (P-16:0/18:2)*	0.00239904
52682	1-(1-enyl-palmitoyl)-2-linoleoyl-GPC (P-16:0/18:2)*	0
52689	1-(1-enyl-palmitoyl)-2-arachidonoyl-GPC (P-16:0/20:4)*	0
52690	1-linoleoyl-GPA (18:2)*	0.255498
52697	1-oleoyl-2-docosahexaenoyl-GPC (18:1/22:6)*	0
52710	1-linoleoyl-2-arachidonoyl-GPC (18:2/20:4n6)*	0.00359856
52713	1-(1-enyl-palmitoyl)-2-palmitoleoyl-GPC (P-16:0/16:1)*	0
52716	1-(1-enyl-palmitoyl)-2-palmitoyl-GPC (P-16:0/16:0)*	0
52747	phenol glucuronide	0.437025
52748	1-(1-enyl-stearoyl)-2-linoleoyl-GPE (P-18:0/18:2)*	0
52914	5-hydroxyindole sulfate	0.568573
52916	2-hydroxylaurate	0.0983607
52925	phenylacetylglutamate	0.148741
52929	3,4-methyleneheptanoylcarnitine	0.364654
52944	palmitoylcholine	0.00119952
52974	glycochenodeoxycholate sulfate	0.0943623
52975	glycodeoxycholate sulfate	0.0611755
52977	glycocholate glucuronide (1)	0.480208
52983	glycochenodeoxycholate glucuronide (1)	0.0411835
52984	3-hydroxybutyrylcarnitine (2)	0.00319872
52988	adipoylcarnitine (C6-DC)	0.0259896
53010	lactosyl-N-palmitoyl-sphingosine (d18:1/16:0)	0
53013	glycosyl-N-palmitoyl-sphingosine (d18:1/16:0)	0
53026	3,4-methyleneheptanoate	0.269892
53031	methylsuccinoylcarnitine	0.335066
53176	1-linoleoyl-2-linolenoyl-GPC (18:2/18:3)*	0.0427829
53180	1-palmitoleoyl-2-linolenoyl-GPC (16:1/18:3)*	0.261096
53195	1-myristoyl-2-arachidonoyl-GPC (14:0/20:4)*	0
53209	1-oleoyl-2-docosahexaenoyl-GPE (18:1/22:6)*	0.202719
53223	palmitoleoylcarnitine (C16:1)*	0
53224	pimeloylcarnitine/3-methyladipoylcarnitine (C7-DC)	0.252299
53230	3-hydroxyhexanoate	0
53231	thioproline	0
53242	5-bromotryptophan	0
53254	caffeic acid sulfate	0.484606
53258	eicosapentaenoylcholine	0.493003
53260	oleoylcholine	0.00439824
53261	arachidonoylcholine	0.00319872
53262	dihomo-linolenoyl-choline	0.0823671
53263	docosahexaenoylcholine	0.0667733
54805	3beta-hydroxy-5-cholestenoate	0
54885	1-linoleoyl-GPG (18:2)*	0.0151939
54907	hexanoylglutamine	0.0263894
54910	vanillactate	0.153938
54923	beta-citrylglutamate	0.00079968
54945	oleoyl-oleoyl-glycerol (18:1/18:1) [1]*	0.0839664
54946	oleoyl-oleoyl-glycerol (18:1/18:1) [2]*	0.0059976
54955	linoleoyl-arachidonoyl-glycerol (18:2/20:4) [1]*	0.0903639
54956	linoleoyl-arachidonoyl-glycerol (18:2/20:4) [2]*	0.0815674
54960	oleoyl-arachidonoyl-glycerol (18:1/20:4) [1]*	0.0383846
54961	oleoyl-arachidonoyl-glycerol (18:1/20:4) [2]*	0.0511795
54967	palmitoleoyl-linoleoyl-glycerol (16:1/18:2) [1]*	0.0531787
54968	linoleoyl-linoleoyl-glycerol (18:2/18:2) [1]*	0.00239904
54979	N-stearoyl-sphingosine (d18:1/18:0)*	0
55015	gamma-glutamyl-alpha-lysine	0
55017	4-hydroxyphenylacetylglutamine	0.140744
55072	2-oxoarginine*	0.0435826
57330	lignoceroyl sphingomyelin (d18:1/24:0)	0
57331	behenoyl dihydrosphingomyelin (d18:0/22:0)*	0
57365	myristoyl dihydrosphingomyelin (d18:0/14:0)*	0
57370	lactosyl-N-nervonoyl-sphingosine (d18:1/24:1)*	0
57407	myristoyl-linoleoyl-glycerol (14:0/18:2) [1]*	0.298681
57417	N-stearoyl-sphingadienine (d18:2/18:0)*	0.140344
57421	glycosyl-N-behenoyl-sphingadienine (d18:2/22:0)*	0
57422	lactosyl-N-behenoyl-sphingosine (d18:1/22:0)*	0.0155938
57428	hexadecasphingosine (d16:1)*	0.62375
57430	N-palmitoyl-heptadecasphingosine (d17:1/16:0)*	0.0795682
57443	ceramide (d18:2/24:1, d18:1/24:2)*	0
57448	glycosyl ceramide (d18:1/23:1, d17:1/24:1)*	0.379448
57453	glycosyl ceramide (d18:2/24:1, d18:1/24:2)*	0
57461	argininate*	0
57463	linoleoylcholine*	0.00159936
57464	stearoylcholine*	0.0219912
57473	sphingomyelin (d18:0/18:0, d19:0/17:0)*	0
57474	sphingomyelin (d18:2/18:1)*	0
57475	sphingomyelin (d18:1/19:0, d19:1/18:0)*	0
57476	sphingomyelin (d18:0/20:0, d16:0/22:0)*	0
57477	sphingomyelin (d18:1/22:2, d18:2/22:1, d16:1/24:2)*	0
57478	sphingomyelin (d18:1/25:0, d19:0/24:1, d20:1/23:0, d19:1/24:0)*	0
57479	sphingomyelin (d18:2/24:2)*	0
57480	sphingomyelin (d18:2/21:0, d16:2/23:0)*	0
57481	sphingomyelin (d18:1/20:2, d18:2/20:1, d16:1/22:2)*	0.00159936
57482	sphingomyelin (d18:2/23:1)*	0
57483	sphingomyelin (d17:2/16:0, d18:2/15:0)*	0
57511	linolenoylcarnitine (C18:3)*	0.0019992
57512	margaroylcarnitine (C17)*	0.0103958
57513	arachidoylcarnitine (C20)*	0.0187925
57514	behenoylcarnitine (C22)*	0.0919632
57515	lignoceroylcarnitine (C24)*	0
57516	cerotoylcarnitine (C26)*	0
57517	ximenoylcarnitine (C26:1)*	0.00039984
57518	arachidonoylcarnitine (C20:4)	0.00559776
57519	eicosenoylcarnitine (C20:1)*	0.00079968
57520	dihomo-linoleoylcarnitine (C20:2)*	0.0115954
57521	dihomo-linolenoylcarnitine (20:3n3 or 6)*	0.00359856
57528	adrenoylcarnitine (C22:4)*	0.420632
57531	nervonoylcarnitine (C24:1)*	0.0247901
57547	2,3-dihydroxy-2-methylbutyrate	0.232707
57554	2'-O-methylcytidine	0.00039984
57564	perfluorooctanesulfonic acid (PFOS)	0
57577	isoursodeoxycholate	0.00679728
57591	beta-cryptoxanthin	0.00239904
57595	glycosyl ceramide (d18:1/20:0, d16:1/22:0)*	0
57635	carotene diol (1)	0
57636	carotene diol (2)	0.00239904
57637	carotene diol (3)	0.0243902
57652	hexadecadienoate (16:2n6)	0.00039984
57655	2'-O-methyluridine	0.0583766
57658	heneicosapentaenoate (21:5n3)	0.448221
57664	N-oleoylserine	0.122751
57687	N-trimethyl 5-aminovalerate	0
57711	HWESASXX*	0.552579
57741	glycocholenate sulfate*	0
57745	phenylacetate	0.228709
57746	anthranilate	0.365054
57747	3-methylglutaconate	0
57783	1H-indole-7-acetic acid	0.067573
57810	nisinate (24:6n3)	0.427429
57814	(N(1) + N(8))-acetylspermidine	0.0831667
61505	1-cerotoyl-GPC (26:0)*	0.253499
61702	2-hydroxyphytanate*	0
61769	5-dodecenoylcarnitine (C12:1)	0.00039984
61833	5,6-dihydrouridine	0.00039984
61843	3-hydroxyoleate*	0.0183926
61846	androsterone glucuronide	0.0435826
61858	ribulonate/xylulonate*	0.00559776
61861	octadecenedioate (C18:1-DC)*	0
61862	hexadecenedioate (C16:1-DC)*	0.0295882
61865	octadecenedioylcarnitine (C18:1-DC)*	0.00319872
61866	heptenedioate (C7:1-DC)*	0.0103958
61867	octadecanedioylcarnitine (C18-DC)*	0.0111955
61868	1-ribosyl-imidazoleacetate*	0
61871	3-carboxy-4-methyl-5-pentyl-2-furanpropionate (3-Cmpfp)**	0
61881	glucuronide of C10H18O2 (1)*	0.744502
61887	glucuronide of C10H18O2 (7)*	0.418233
61970	glucuronide of C14H22O4 (2)*	0.542983
62059	N-acetyl-2-aminooctanoate*	0
62060	hydroxyasparagine**	0
62062	3-hydroxystachydrine*	0.219512
62064	3-hydroxybutyroylglycine**	0.0119952
62065	glyco-alpha-muricholate**	0.529788
62066	glyco-beta-muricholate**	0.187525
62068	N-methylhydroxyproline**	0.261096
62069	3-hydroxyadipate*	0.129548
62071	perfluorooctanoate (PFOA)*	0.00039984
62101	alpha-ketoglutaramate**	0
62103	cysteinylglycine disulfide*	0
62104	gamma-glutamylcitrulline*	0.00039984
62145	glycine conjugate of C10H12O2*	0.30068
62146	glycine conjugate of C10H14O2 (1)*	0.0371851
62152	sphingomyelin (d17:1/14:0, d16:1/15:0)*	0
* Indicates a compound that has not been confirmed based on a standard, but we are confident in its identity.
**Indicates a compound for which a standard is not available, but we are reasonably confident in its identity or the information provided.

## Sheet: Supplemental Table 2
Supplemental Table 2. Further information on metabolites remaining post QC.
Biochemical Names	Compound ID	Super Pathway	Sub-pathway	HMDB ID
linoleate (18:2n6)	1105	Lipid	Polyunsaturated Fatty Acid (n3 and n6)	HMDB00673
allantoin	1107	Nucleotide	Purine Metabolism, (Hypo)Xanthine/Inosine containing	HMDB00462
arachidonate (20:4n6)	1110	Lipid	Polyunsaturated Fatty Acid (n3 and n6)	HMDB01043
deoxycholate	1114	Lipid	Secondary Bile Acid Metabolism	HMDB00626
arachidate (20:0)	1118	Lipid	Long Chain Fatty Acid	HMDB02212
margarate (17:0)	1121	Lipid	Long Chain Fatty Acid	HMDB02259
inosine	1123	Nucleotide	Purine Metabolism, (Hypo)Xanthine/Inosine containing	HMDB00195
myo-inositol	1124	Lipid	Inositol Metabolism	HMDB00211
isoleucine	1125	Amino Acid	Leucine, Isoleucine and Valine Metabolism	HMDB00172
alanine	1126	Amino Acid	Alanine and Aspartate Metabolism	HMDB00161
3-methoxytyrosine	12017	Amino Acid	Tyrosine Metabolism	HMDB01434
4-acetamidophenol	12032	Xenobiotics	Drug - Analgesics, Anesthetics	HMDB01859
beta-hydroxyisovalerate	12129	Amino Acid	Leucine, Isoleucine and Valine Metabolism	HMDB00754
taurodeoxycholate	12261	Lipid	Secondary Bile Acid Metabolism	HMDB00896
threonine	1284	Amino Acid	Glycine, Serine and Threonine Metabolism	HMDB00167
tyrosine	1299	Amino Acid	Tyrosine Metabolism	HMDB00158
lysine	1301	Amino Acid	Lysine Metabolism	HMDB00182
methionine	1302	Amino Acid	Methionine, Cysteine, SAM and Taurine Metabolism	HMDB00696
malate	1303	Energy	TCA Cycle	HMDB00156
palmitate (16:0)	1336	Lipid	Long Chain Fatty Acid	HMDB00220
nonadecanoate (19:0)	1356	Lipid	Long Chain Fatty Acid	HMDB00772
stearate (18:0)	1358	Lipid	Long Chain Fatty Acid	HMDB00827
pentadecanoate (15:0)	1361	Lipid	Long Chain Fatty Acid	HMDB00826
myristate (14:0)	1365	Lipid	Long Chain Fatty Acid	HMDB00806
kynurenate	1417	Amino Acid	Tryptophan Metabolism	HMDB00715
5,6-dihydrothymine	1418	Nucleotide	Pyrimidine Metabolism, Thymine containing	HMDB00079
5-methylthioadenosine (MTA)	1419	Amino Acid	Polyamine Metabolism	HMDB01173
2-hydroxyphenylacetate	1432	Amino Acid	Tyrosine Metabolism	HMDB00669
succinate	1437	Energy	TCA Cycle	HMDB00254
pipecolate	1444	Amino Acid	Lysine Metabolism	HMDB00070
ornithine	1493	Amino Acid	Urea cycle; Arginine and Proline Metabolism	HMDB03374
5-oxoproline	1494	Amino Acid	Glutathione Metabolism	HMDB00267
methylmalonate (MMA)	1496	Lipid	Fatty Acid Metabolism (also BCAA Metabolism)	HMDB00202
N6,N6,N6-trimethyllysine	1498	Amino Acid	Lysine Metabolism	HMDB01325
orotate	1505	Nucleotide	Pyrimidine Metabolism, Orotate containing	HMDB00226
pantothenate	1508	Cofactors and Vitamins	Pantothenate and CoA Metabolism	HMDB00210
glycerol	15122	Lipid	Glycerolipid Metabolism	HMDB00131
kynurenine	15140	Amino Acid	Tryptophan Metabolism	HMDB00684
salicylate	1515	Xenobiotics	Drug - Topical Agents	HMDB01895
sarcosine	1516	Amino Acid	Glycine, Serine and Threonine Metabolism	HMDB00271
tartarate	15336	Xenobiotics	Food Component/Plant	HMDB00956
glucuronate	15443	Carbohydrate	Aminosugar Metabolism	HMDB00127
3-hydroxyisobutyrate	1549	Amino Acid	Leucine, Isoleucine and Valine Metabolism	HMDB00336
carnitine	15500	Lipid	Carnitine Metabolism	HMDB00062
choline	15506	Lipid	Phospholipid Metabolism	HMDB00097
erucate (22:1n9)	1552	Lipid	Long Chain Fatty Acid	HMDB02068
4-acetamidobutanoate	1558	Amino Acid	Polyamine Metabolism	HMDB03681
xylose	15581	Carbohydrate	Pentose Metabolism	HMDB00098
maltose	15586	Carbohydrate	Glycogen Metabolism	HMDB00163
5,6-dihydrouracil	1559	Nucleotide	Pyrimidine Metabolism, Uracil containing	HMDB00076
alpha-tocopherol	1561	Cofactors and Vitamins	Tocopherol Metabolism	HMDB01893
chenodeoxycholate	1563	Lipid	Primary Bile Acid Metabolism	HMDB00518
citrate	1564	Energy	TCA Cycle	HMDB00094
N1-methyladenosine	15650	Nucleotide	Purine Metabolism, Adenine containing	HMDB03331
3-aminoisobutyrate	1566	Nucleotide	Pyrimidine Metabolism, Thymine containing	HMDB03911
vanillylmandelate (VMA)	1567	Amino Acid	Tyrosine Metabolism	HMDB00291
3-methyl-2-oxovalerate	15676	Amino Acid	Leucine, Isoleucine and Valine Metabolism	HMDB03736
3-methylhistidine	15677	Amino Acid	Histidine Metabolism	HMDB00479
xanthurenate	15679	Amino Acid	Tryptophan Metabolism	HMDB00881
4-guanidinobutanoate	15681	Amino Acid	Guanidino and Acetamido Metabolism	HMDB03464
5-hydroxylysine	15685	Amino Acid	Lysine Metabolism	HMDB00450
cystathionine	15705	Amino Acid	Methionine, Cysteine, SAM and Taurine Metabolism	HMDB00099
imidazole lactate	15716	Amino Acid	Histidine Metabolism	HMDB02320
glycerate	1572	Carbohydrate	Glycolysis, Gluconeogenesis, and Pyruvate Metabolism	HMDB00139
N-acetylglutamate	15720	Amino Acid	Glutamate Metabolism	HMDB01138
4-acetamidophenylglucuronide	15736	Xenobiotics	Drug - Analgesics, Anesthetics	HMDB10316
methylsuccinate	15745	Amino Acid	Leucine, Isoleucine and Valine Metabolism	HMDB01844
3-phenylpropionate (hydrocinnamate)	15749	Xenobiotics	Benzoate Metabolism	HMDB00764
hippurate	15753	Xenobiotics	Benzoate Metabolism	HMDB00714
ethylmalonate	15765	Amino Acid	Leucine, Isoleucine and Valine Metabolism	HMDB00622
ribitol	15772	Carbohydrate	Pentose Metabolism	HMDB00508
benzoate	15778	Xenobiotics	Benzoate Metabolism	HMDB01870
methyl indole-3-acetate	1584	Xenobiotics	Food Component/Plant	HMDB29738
N-acetylalanine	1585	Amino Acid	Alanine and Aspartate Metabolism	HMDB00766
N-acetylleucine	1587	Amino Acid	Leucine, Isoleucine and Valine Metabolism	HMDB11756
N-acetylmethionine	1589	Amino Acid	Methionine, Cysteine, SAM and Taurine Metabolism	HMDB11745
N-acetylvaline	1591	Amino Acid	Leucine, Isoleucine and Valine Metabolism	HMDB11757
glycerophosphorylcholine (GPC)	15990	Lipid	Phospholipid Metabolism	HMDB00086
phosphoethanolamine	1600	Lipid	Phospholipid Metabolism	HMDB00224
urate	1604	Nucleotide	Purine Metabolism, (Hypo)Xanthine/Inosine containing	HMDB00289
arginine	1638	Amino Acid	Urea cycle; Arginine and Proline Metabolism	HMDB00517
caprate (10:0)	1642	Lipid	Medium Chain Fatty Acid	HMDB00511
fumarate	1643	Energy	TCA Cycle	HMDB00134
heptanoate (7:0)	1644	Lipid	Medium Chain Fatty Acid	HMDB00666
laurate (12:0)	1645	Lipid	Medium Chain Fatty Acid	HMDB00638
serine	1648	Amino Acid	Glycine, Serine and Threonine Metabolism	HMDB00187
valine	1649	Amino Acid	Leucine, Isoleucine and Valine Metabolism	HMDB00883
4-hydroxyphenylpyruvate	1669	Amino Acid	Tyrosine Metabolism	HMDB00707
urea	1670	Amino Acid	Urea cycle; Arginine and Proline Metabolism	HMDB00294
cortisol	1712	Lipid	Corticosteroids	HMDB00063
cortisone	1769	Lipid	Corticosteroids	HMDB02802
sphingosine	17747	Lipid	Sphingolipid Metabolism	HMDB00252
sphinganine	17769	Lipid	Sphingolipid Metabolism	HMDB00269
dihomo-linoleate (20:2n6)	17805	Lipid	Polyunsaturated Fatty Acid (n3 and n6)	HMDB05060
2-hydroxystearate	17945	Lipid	Fatty Acid, Monohydroxy	NA
retinol (Vitamin A)	1806	Cofactors and Vitamins	Vitamin A Metabolism	HMDB00305
gamma-glutamylhistidine	18245	Peptide	Gamma-glutamyl Amino Acid	NA
paraxanthine	18254	Xenobiotics	Xanthine Metabolism	HMDB01860
gentisate	18280	Amino Acid	Tyrosine Metabolism	HMDB00152
2-hydroxyhippurate (salicylurate)	18281	Xenobiotics	Benzoate Metabolism	HMDB00840
quinate	18335	Xenobiotics	Food Component/Plant	HMDB03072
indolelactate	18349	Amino Acid	Tryptophan Metabolism	HMDB00671
cys-gly, oxidized	18368	Amino Acid	Glutathione Metabolism	NA
gamma-glutamylleucine	18369	Peptide	Gamma-glutamyl Amino Acid	HMDB11171
methionine sulfoxide	18374	Amino Acid	Methionine, Cysteine, SAM and Taurine Metabolism	HMDB02005
theobromine	18392	Xenobiotics	Xanthine Metabolism	HMDB02825
theophylline	18394	Xenobiotics	Xanthine Metabolism	HMDB01889
eicosapentaenoate (EPA; 20:5n3)	18467	Lipid	Polyunsaturated Fatty Acid (n3 and n6)	HMDB01999
glycocholate	18476	Lipid	Primary Bile Acid Metabolism	HMDB00138
glycodeoxycholate	18477	Lipid	Secondary Bile Acid Metabolism	HMDB00631
taurochenodeoxycholate	18494	Lipid	Primary Bile Acid Metabolism	HMDB00951
taurocholate	18497	Lipid	Primary Bile Acid Metabolism	HMDB00036
cysteine	1868	Amino Acid	Methionine, Cysteine, SAM and Taurine Metabolism	HMDB00574
proline	1898	Amino Acid	Urea cycle; Arginine and Proline Metabolism	HMDB00162
quinolinate	1899	Cofactors and Vitamins	Nicotinate and Nicotinamide Metabolism	HMDB00232
1,2-dipalmitoyl-GPC (16:0/16:0)	19130	Lipid	Phosphatidylcholine (PC)	HMDB00564
1-myristoyl-2-palmitoyl-GPC (14:0/16:0)	19258	Lipid	Phosphatidylcholine (PC)	HMDB07869
1-palmitoyl-2-oleoyl-GPE (16:0/18:1)	19263	Lipid	Phosphatidylethanolamine (PE)	HMDB05320
1-stearoyl-GPI (18:0)	19324	Lipid	Lysophospholipid	HMDB61696
stearoyl sphingomyelin (d18:1/18:0)	19503	Lipid	Sphingolipid Metabolism	HMDB01348
1,5-anhydroglucitol (1,5-AG)	20675	Carbohydrate	Glycolysis, Gluconeogenesis, and Pyruvate Metabolism	HMDB02712
maleate	20676	Lipid	Fatty Acid, Dicarboxylate	HMDB00176
tartronate (hydroxymalonate)	20693	Xenobiotics	Bacterial/Fungal	HMDB35227
oxalate (ethanedioate)	20694	Cofactors and Vitamins	Ascorbate and Aldarate Metabolism	HMDB02329
erythritol	20699	Xenobiotics	Food Component/Plant	HMDB02994
iminodiacetate (IDA)	21025	Xenobiotics	Chemical	HMDB11753
saccharin	21151	Xenobiotics	Food Component/Plant	HMDB29723
1-oleoylglycerol (18:1)	21184	Lipid	Monoacylglycerol	HMDB11567
taurine	2125	Amino Acid	Methionine, Cysteine, SAM and Taurine Metabolism	HMDB00251
citrulline	2132	Amino Acid	Urea cycle; Arginine and Proline Metabolism	HMDB00904
biliverdin	2137	Cofactors and Vitamins	Hemoglobin and Porphyrin Metabolism	HMDB01008
3-hydroxyoctanoate	22001	Lipid	Fatty Acid, Monohydroxy	HMDB01954
2-hydroxyoctanoate	22036	Lipid	Fatty Acid, Monohydroxy	HMDB02264
3-hydroxydecanoate	22053	Lipid	Fatty Acid, Monohydroxy	HMDB02203
4-methyl-2-oxopentanoate	22116	Amino Acid	Leucine, Isoleucine and Valine Metabolism	HMDB00695
phenyllactate (PLA)	22130	Amino Acid	Phenylalanine Metabolism	HMDB00779
alpha-hydroxyisocaproate	22132	Amino Acid	Leucine, Isoleucine and Valine Metabolism	HMDB00746
homoarginine	22137	Amino Acid	Urea cycle; Arginine and Proline Metabolism	HMDB00670
homocitrulline	22138	Amino Acid	Urea cycle; Arginine and Proline Metabolism	HMDB00679
EDTA	22163	Xenobiotics	Chemical	HMDB15109
cysteine s-sulfate	22176	Amino Acid	Methionine, Cysteine, SAM and Taurine Metabolism	HMDB00731
N-acetylaspartate (NAA)	22185	Amino Acid	Alanine and Aspartate Metabolism	HMDB00812
cholate	22842	Lipid	Primary Bile Acid Metabolism	HMDB00619
serotonin	2342	Amino Acid	Tryptophan Metabolism	HMDB00259
gamma-glutamylglutamine	2730	Peptide	Gamma-glutamyl Amino Acid	HMDB11738
gamma-glutamyltyrosine	2734	Peptide	Gamma-glutamyl Amino Acid	HMDB11741
1-linoleoylglycerol (18:2)	27447	Lipid	Monoacylglycerol	NA
indoleacetate	27513	Amino Acid	Tryptophan Metabolism	HMDB00197
thyroxine	2761	Amino Acid	Tyrosine Metabolism	HMDB01918
1-methylnicotinamide	27665	Cofactors and Vitamins	Nicotinate and Nicotinamide Metabolism	HMDB00699
3-indoxyl sulfate	27672	Amino Acid	Tryptophan Metabolism	HMDB00682
N-acetylglycine	27710	Amino Acid	Glycine, Serine and Threonine Metabolism	HMDB00532
creatine	27718	Amino Acid	Creatine Metabolism	HMDB00064
galactonate	27719	Carbohydrate	Fructose, Mannose and Galactose Metabolism	HMDB00565
ribonate	27731	Carbohydrate	Pentose Metabolism	HMDB00867
threonate	27738	Cofactors and Vitamins	Ascorbate and Aldarate Metabolism	HMDB00943
N-formylmethionine	2829	Amino Acid	Methionine, Cysteine, SAM and Taurine Metabolism	HMDB01015
1-methylhistidine	30460	Amino Acid	Histidine Metabolism	HMDB00001
hypoxanthine	3127	Nucleotide	Purine Metabolism, (Hypo)Xanthine/Inosine containing	HMDB00157
betaine	3141	Amino Acid	Glycine, Serine and Threonine Metabolism	HMDB00043
xanthine	3147	Nucleotide	Purine Metabolism, (Hypo)Xanthine/Inosine containing	HMDB00292
N-(2-furoyl)glycine	31536	Xenobiotics	Food Component/Plant	HMDB00439
3-ureidopropionate	3155	Nucleotide	Pyrimidine Metabolism, Uracil containing	HMDB00026
pyridoxate	31555	Cofactors and Vitamins	Vitamin B6 Metabolism	HMDB00017
androsterone sulfate	31591	Lipid	Androgenic Steroids	HMDB02759
3-carboxy-4-methyl-5-propyl-2-furanpropanoate (CMPF)	31787	Lipid	Fatty Acid, Dicarboxylate	HMDB61112
7-ketodeoxycholate	31904	Lipid	Secondary Bile Acid Metabolism	HMDB00391
glycolithocholate	31912	Lipid	Secondary Bile Acid Metabolism	HMDB00698
propionylglycine	31932	Lipid	Fatty Acid Metabolism (also BCAA Metabolism)	HMDB00783
5-hydroxyhexanoate	31938	Lipid	Fatty Acid, Monohydroxy	HMDB00525
3-hydroxysebacate	31943	Lipid	Fatty Acid, Monohydroxy	HMDB00350
3-(4-hydroxyphenyl)lactate	32197	Amino Acid	Tyrosine Metabolism	HMDB00755
acetylcarnitine (C2)	32198	Lipid	Fatty Acid Metabolism(Acyl Carnitine)	HMDB00201
trans-4-hydroxyproline	32306	Amino Acid	Urea cycle; Arginine and Proline Metabolism	HMDB00725
hexanoylcarnitine (C6)	32328	Lipid	Fatty Acid Metabolism(Acyl Carnitine)	HMDB00705
adenosine 5'-monophosphate (AMP)	32342	Nucleotide	Purine Metabolism, Adenine containing	HMDB00045
glycochenodeoxycholate	32346	Lipid	Primary Bile Acid Metabolism	HMDB00637
1-methyl-4-imidazoleacetate	32350	Amino Acid	Histidine Metabolism	HMDB02820
N-acetylneuraminate	32377	Carbohydrate	Aminosugar Metabolism	HMDB00230
dodecanedioate (C12-DC)	32388	Lipid	Fatty Acid, Dicarboxylate	HMDB00623
N-acetyltyrosine	32390	Amino Acid	Tyrosine Metabolism	HMDB00866
1,3-dimethylurate	32391	Xenobiotics	Xanthine Metabolism	HMDB01857
3-hydroxy-2-ethylpropionate	32397	Amino Acid	Leucine, Isoleucine and Valine Metabolism	HMDB00396
trigonelline (N'-methylnicotinate)	32401	Cofactors and Vitamins	Nicotinate and Nicotinamide Metabolism	HMDB00875
indolepropionate	32405	Amino Acid	Tryptophan Metabolism	HMDB02302
butyrylcarnitine (C4)	32412	Lipid	Fatty Acid Metabolism (also BCAA Metabolism)	HMDB02013
docosadienoate (22:2n6)	32415	Lipid	Polyunsaturated Fatty Acid (n3 and n6)	HMDB61714
myristoleate (14:1n5)	32418	Lipid	Long Chain Fatty Acid	HMDB02000
dehydroisoandrosterone sulfate (DHEA-S)	32425	Lipid	Androgenic Steroids	HMDB01032
I-urobilinogen	32426	Cofactors and Vitamins	Hemoglobin and Porphyrin Metabolism	HMDB04157
3-methylxanthine	32445	Xenobiotics	Xanthine Metabolism	HMDB01886
guanidinosuccinate	32446	Amino Acid	Guanidino and Acetamido Metabolism	HMDB03157
propionylcarnitine (C3)	32452	Lipid	Fatty Acid Metabolism (also BCAA Metabolism)	HMDB00824
3-hydroxylaurate	32457	Lipid	Fatty Acid, Monohydroxy	HMDB00387
caproate (6:0)	32489	Lipid	Medium Chain Fatty Acid	HMDB00535
caprylate (8:0)	32492	Lipid	Medium Chain Fatty Acid	HMDB00482
10-undecenoate (11:1n1)	32497	Lipid	Medium Chain Fatty Acid	HMDB33724
docosapentaenoate (n3 DPA; 22:5n3)	32504	Lipid	Polyunsaturated Fatty Acid (n3 and n6)	HMDB06528
2-linoleoylglycerol (18:2)	32506	Lipid	Monoacylglycerol	HMDB11538
phenol sulfate	32553	Amino Acid	Tyrosine Metabolism	HMDB60015
pregnen-diol disulfate C21H34O8S2*	32562	Lipid	Pregnenolone Steroids	NA
bilirubin (E,E)*	32586	Cofactors and Vitamins	Hemoglobin and Porphyrin Metabolism	NA
pregn steroid monosulfate C21H34O5S*	32619	Lipid	Pregnenolone Steroids	NA
glycolithocholate sulfate*	32620	Lipid	Secondary Bile Acid Metabolism	HMDB02639
taurocholenate sulfate	32807	Lipid	Secondary Bile Acid Metabolism	NA
andro steroid monosulfate C19H28O6S (1)*	32827	Lipid	Androgenic Steroids	HMDB02759
adrenate (22:4n6)	32980	Lipid	Polyunsaturated Fatty Acid (n3 and n6)	HMDB02226
homostachydrine*	33009	Xenobiotics	Food Component/Plant	HMDB33433
2-hydroxyacetaminophen sulfate*	33173	Xenobiotics	Drug - Analgesics, Anesthetics	NA
1-arachidonoyl-GPC (20:4n6)*	33228	Lipid	Lysophospholipid	HMDB10395
1-palmitoleoyl-GPC (16:1)*	33230	Lipid	Lysophospholipid	HMDB10383
gamma-glutamylthreonine	33364	Peptide	Gamma-glutamyl Amino Acid	HMDB29159
salicyluric glucuronide*	33384	Xenobiotics	Drug - Analgesics, Anesthetics	NA
gamma-glutamylphenylalanine	33422	Peptide	Gamma-glutamyl Amino Acid	HMDB00594
isobutyrylcarnitine (C4)	33441	Amino Acid	Leucine, Isoleucine and Valine Metabolism	HMDB00736
pseudouridine	33442	Nucleotide	Pyrimidine Metabolism, Uracil containing	HMDB00767
palmitoleate (16:1n7)	33447	Lipid	Long Chain Fatty Acid	HMDB03229
glutamate, gamma-methyl ester	33487	Amino Acid	Glutamate Metabolism	HMDB61715
eicosenoate (20:1)	33587	Lipid	Long Chain Fatty Acid	HMDB02231
gamma-glutamyl-epsilon-lysine	33934	Peptide	Gamma-glutamyl Amino Acid	HMDB03869
piperine	33935	Xenobiotics	Food Component/Plant	HMDB29377
octanoylcarnitine (C8)	33936	Lipid	Fatty Acid Metabolism(Acyl Carnitine)	HMDB00791
alpha-hydroxyisovalerate	33937	Amino Acid	Leucine, Isoleucine and Valine Metabolism	HMDB00407
N-acetylthreonine	33939	Amino Acid	Glycine, Serine and Threonine Metabolism	NA
decanoylcarnitine (C10)	33941	Lipid	Fatty Acid Metabolism(Acyl Carnitine)	HMDB00651
N-acetylasparagine	33942	Amino Acid	Alanine and Aspartate Metabolism	HMDB06028
N-acetylglutamine	33943	Amino Acid	Glutamate Metabolism	HMDB06029
N-acetylhistidine	33946	Amino Acid	Histidine Metabolism	HMDB32055
gamma-glutamyltryptophan	33947	Peptide	Gamma-glutamyl Amino Acid	HMDB29160
gamma-glutamylglycine	33949	Peptide	Gamma-glutamyl Amino Acid	HMDB11667
N-acetylphenylalanine	33950	Amino Acid	Phenylalanine Metabolism	HMDB00512
myristoylcarnitine (C14)	33952	Lipid	Fatty Acid Metabolism(Acyl Carnitine)	HMDB05066
N-acetylarginine	33953	Amino Acid	Urea cycle; Arginine and Proline Metabolism	HMDB04620
1-palmitoyl-GPC (16:0)	33955	Lipid	Lysophospholipid	HMDB10382
N-acetyltryptophan	33959	Amino Acid	Tryptophan Metabolism	HMDB13713
1-stearoyl-GPC (18:0)	33961	Lipid	Lysophospholipid	HMDB10384
acetoacetate	33963	Lipid	Ketone Bodies	HMDB00060
N-acetylisoleucine	33967	Amino Acid	Leucine, Isoleucine and Valine Metabolism	HMDB61684
5-dodecenoate (12:1n7)	33968	Lipid	Medium Chain Fatty Acid	HMDB00529
stearidonate (18:4n3)	33969	Lipid	Polyunsaturated Fatty Acid (n3 and n6)	HMDB06547
10-heptadecenoate (17:1n7)	33971	Lipid	Long Chain Fatty Acid	HMDB60038
10-nonadecenoate (19:1n9)	33972	Lipid	Long Chain Fatty Acid	HMDB13622
epiandrosterone sulfate	33973	Lipid	Androgenic Steroids	NA
tauro-beta-muricholate	33983	Lipid	Primary Bile Acid Metabolism	HMDB00932
linolenate [alpha or gamma; (18:3n3 or 6)]	34035	Lipid	Polyunsaturated Fatty Acid (n3 and n6)	HMDB03073
1-arachidonoyl-GPI (20:4)*	34214	Lipid	Lysophospholipid	HMDB61690
stachydrine	34384	Xenobiotics	Food Component/Plant	HMDB04827
1-methylxanthine	34389	Xenobiotics	Xanthine Metabolism	HMDB10738
7-methylxanthine	34390	Xenobiotics	Xanthine Metabolism	HMDB01991
1-methylurate	34395	Xenobiotics	Xanthine Metabolism	HMDB03099
choline phosphate	34396	Lipid	Phospholipid Metabolism	HMDB01565
1-arachidonylglycerol (20:4)	34397	Lipid	Monoacylglycerol	HMDB11549
3,7-dimethylurate	34399	Xenobiotics	Xanthine Metabolism	HMDB01982
1,7-dimethylurate	34400	Xenobiotics	Xanthine Metabolism	HMDB11103
5-acetylamino-6-formylamino-3-methyluracil	34401	Xenobiotics	Xanthine Metabolism	HMDB11105
1,3,7-trimethylurate	34404	Xenobiotics	Xanthine Metabolism	HMDB02123
isovalerylcarnitine (C5)	34407	Amino Acid	Leucine, Isoleucine and Valine Metabolism	HMDB00688
stearoylcarnitine (C18)	34409	Lipid	Fatty Acid Metabolism(Acyl Carnitine)	HMDB00848
1-linoleoyl-GPC (18:2)	34419	Lipid	Lysophospholipid	HMDB10386
5-acetylamino-6-amino-3-methyluracil	34424	Xenobiotics	Xanthine Metabolism	HMDB04400
sphingosine 1-phosphate	34445	Lipid	Sphingolipid Metabolism	HMDB00277
gamma-glutamylisoleucine*	34457	Peptide	Gamma-glutamyl Amino Acid	HMDB11170
laurylcarnitine (C12)	34534	Lipid	Fatty Acid Metabolism(Acyl Carnitine)	HMDB02250
beta-guanidinopropanoate	35101	Xenobiotics	Food Component/Plant	HMDB13222
isovalerylglycine	35107	Amino Acid	Leucine, Isoleucine and Valine Metabolism	HMDB00678
7-methylguanine	35114	Nucleotide	Purine Metabolism, Guanine containing	HMDB00897
phenylacetylglutamine	35126	Peptide	Acetylated Peptides	HMDB06344
pro-hydroxy-pro	35127	Amino Acid	Urea cycle; Arginine and Proline Metabolism	HMDB06695
N4-acetylcytidine	35130	Nucleotide	Pyrimidine Metabolism, Cytidine containing	HMDB05923
3-methylcytidine	35132	Nucleotide	Pyrimidine Metabolism, Cytidine containing	NA
5-methyluridine (ribothymidine)	35136	Nucleotide	Pyrimidine Metabolism, Uracil containing	HMDB00884
N2,N2-dimethylguanosine	35137	Nucleotide	Purine Metabolism, Guanine containing	HMDB04824
N6-carbamoylthreonyladenosine	35157	Nucleotide	Purine Metabolism, Adenine containing	HMDB41623
cysteine-glutathione disulfide	35159	Amino Acid	Glutathione Metabolism	HMDB00656
oleoylcarnitine (C18:1)	35160	Lipid	Fatty Acid Metabolism(Acyl Carnitine)	HMDB05065
orotidine	35172	Nucleotide	Pyrimidine Metabolism, Orotate containing	HMDB00788
1-arachidonoyl-GPE (20:4n6)*	35186	Lipid	Lysophospholipid	HMDB11517
2-palmitoyl-GPC (16:0)*	35253	Lipid	Lysophospholipid	HMDB61702
1-palmitoyl-GPI (16:0)	35305	Lipid	Lysophospholipid	HMDB61695
catechol sulfate	35320	Xenobiotics	Benzoate Metabolism	HMDB59724
hydroquinone sulfate	35322	Xenobiotics	Drug - Topical Agents	HMDB02434
hexanoylglycine	35436	Lipid	Fatty Acid Metabolism(Acyl Glycine)	HMDB00701
4-hydroxyhippurate	35527	Xenobiotics	Benzoate Metabolism	HMDB13678
1-oleoyl-GPE (18:1)	35628	Lipid	Lysophospholipid	HMDB11506
1-palmitoyl-GPE (16:0)	35631	Lipid	Lysophospholipid	HMDB11503
3-(3-hydroxyphenyl)propionate	35635	Xenobiotics	Benzoate Metabolism	HMDB00375
cysteinylglycine	35637	Amino Acid	Glutathione Metabolism	HMDB00078
ectoine	35651	Xenobiotics	Chemical	NA
tetradecanedioate (C14-DC)	35669	Lipid	Fatty Acid, Dicarboxylate	HMDB00872
2-hydroxypalmitate	35675	Lipid	Fatty Acid, Monohydroxy	HMDB31057
hexadecanedioate (C16-DC)	35678	Lipid	Fatty Acid, Dicarboxylate	HMDB00672
dihomo-linolenate (20:3n3 or n6)	35718	Lipid	Polyunsaturated Fatty Acid (n3 and n6)	HMDB02925
thymol sulfate	36095	Xenobiotics	Food Component/Plant	HMDB01878
4-vinylphenol sulfate	36098	Xenobiotics	Benzoate Metabolism	HMDB04072
4-ethylphenylsulfate	36099	Xenobiotics	Benzoate Metabolism	NA
p-cresol sulfate	36103	Xenobiotics	Benzoate Metabolism	HMDB11635
1-linoleoyl-GPI (18:2)*	36594	Lipid	Lysophospholipid	NA
1-linoleoyl-GPE (18:2)*	36600	Lipid	Lysophospholipid	HMDB11507
1-oleoyl-GPI (18:1)*	36602	Lipid	Lysophospholipid	NA
gamma-glutamylglutamate	36738	Peptide	Gamma-glutamyl Amino Acid	HMDB11737
2-hydroxy-3-methylvalerate	36746	Amino Acid	Leucine, Isoleucine and Valine Metabolism	HMDB00317
deoxycarnitine	36747	Lipid	Carnitine Metabolism	HMDB01161
N2-acetyllysine	36751	Amino Acid	Lysine Metabolism	HMDB00446
N6-acetyllysine	36752	Amino Acid	Lysine Metabolism	HMDB00206
octadecanedioate (C18-DC)	36754	Lipid	Fatty Acid, Dicarboxylate	HMDB00782
7-alpha-hydroxy-3-oxo-4-cholestenoate (7-Hoca)	36776	Lipid	Sterol	HMDB12458
dimethylarginine (SDMA + ADMA)	36808	Amino Acid	Urea cycle; Arginine and Proline Metabolism	HMDB01539
o-cresol sulfate	36845	Xenobiotics	Benzoate Metabolism	NA
taurolithocholate 3-sulfate	36850	Lipid	Secondary Bile Acid Metabolism	HMDB02580
succinylcarnitine (C4-DC)	37058	Energy	TCA Cycle	HMDB61717
malonylcarnitine	37059	Lipid	Fatty Acid Synthesis	HMDB02095
gamma-glutamylalanine	37063	Peptide	Gamma-glutamyl Amino Acid	HMDB29142
N-acetylserine	37076	Amino Acid	Glycine, Serine and Threonine Metabolism	HMDB02931
tryptophan betaine	37097	Amino Acid	Tryptophan Metabolism	HMDB61115
chiro-inositol	37112	Lipid	Inositol Metabolism	HMDB34220
4-allylphenol sulfate	37181	Xenobiotics	Food Component/Plant	NA
5alpha-androstan-3alpha,17alpha-diol monosulfate	37183	Lipid	Androgenic Steroids	NA
5alpha-androstan-3alpha,17beta-diol disulfate	37184	Lipid	Androgenic Steroids	NA
5alpha-androstan-3alpha,17beta-diol monosulfate (2)	37185	Lipid	Androgenic Steroids	NA
5alpha-androstan-3alpha,17beta-diol monosulfate (1)	37186	Lipid	Androgenic Steroids	NA
5alpha-androstan-3beta,17alpha-diol disulfate	37187	Lipid	Androgenic Steroids	NA
5alpha-androstan-3beta,17beta-diol disulfate	37190	Lipid	Androgenic Steroids	HMDB00493
5alpha-androstan-3beta,17beta-diol monosulfate (2)	37192	Lipid	Androgenic Steroids	NA
5alpha-pregnan-3beta,20beta-diol monosulfate (1)	37196	Lipid	Progestin Steroids	NA
5alpha-pregnan-3beta,20alpha-diol disulfate	37198	Lipid	Progestin Steroids	NA
5alpha-pregnan-3beta,20alpha-diol monosulfate (2)	37200	Lipid	Progestin Steroids	NA
androstenediol (3beta,17beta) disulfate (1)	37202	Lipid	Androgenic Steroids	HMDB03818
androstenediol (3beta,17beta) disulfate (2)	37203	Lipid	Androgenic Steroids	HMDB03818
androstenediol (3alpha, 17alpha) monosulfate (2)	37207	Lipid	Androgenic Steroids	NA
androstenediol (3alpha, 17alpha) monosulfate (3)	37209	Lipid	Androgenic Steroids	NA
androstenediol (3beta,17beta) monosulfate (2)	37210	Lipid	Androgenic Steroids	NA
androstenediol (3beta,17beta) monosulfate (1)	37211	Lipid	Androgenic Steroids	HMDB03818
2-hydroxyglutarate	37253	Lipid	Fatty Acid, Dicarboxylate	HMDB00606
N-methylproline	37431	Amino Acid	Urea cycle; Arginine and Proline Metabolism	NA
N-acetyl-beta-alanine	37432	Nucleotide	Pyrimidine Metabolism, Uracil containing	NA
cysteine sulfinic acid	37443	Amino Acid	Methionine, Cysteine, SAM and Taurine Metabolism	HMDB00996
4-hydroxycoumarin	37445	Xenobiotics	Drug - Cardiovascular	NA
glycerophosphoethanolamine	37455	Lipid	Phospholipid Metabolism	HMDB00114
ergothioneine	37459	Xenobiotics	Food Component/Plant	HMDB03045
4-acetaminophen sulfate	37475	Xenobiotics	Drug - Analgesics, Anesthetics	HMDB59911
docosapentaenoate (n6 DPA; 22:5n6)	37478	Lipid	Polyunsaturated Fatty Acid (n3 and n6)	HMDB01976
17alpha-hydroxypregnenolone 3-sulfate	37482	Lipid	Pregnenolone Steroids	HMDB00416
N-acetylputrescine	37496	Amino Acid	Polyamine Metabolism	HMDB02064
palmitoyl sphingomyelin (d18:1/16:0)	37506	Lipid	Sphingolipid Metabolism	NA
sphingomyelin (d18:1/18:1, d18:2/18:0)	37529	Lipid	Sphingolipid Metabolism	HMDB12101
13-HODE + 9-HODE	37752	Lipid	Fatty Acid, Monohydroxy	NA
betonicine	38100	Xenobiotics	Food Component/Plant	HMDB29412
oleoyl ethanolamide	38102	Lipid	Endocannabinoid	HMDB02088
indole-3-carboxylic acid	38116	Amino Acid	Tryptophan Metabolism	HMDB03320
4-cholesten-3-one	38125	Lipid	Sterol	HMDB00921
S-methylmethionine	38127	Amino Acid	Methionine, Cysteine, SAM and Taurine Metabolism	HMDB38670
palmitoyl ethanolamide	38165	Lipid	Endocannabinoid	HMDB02100
16a-hydroxy DHEA 3-sulfate	38168	Lipid	Androgenic Steroids	NA
pregnenolone sulfate	38170	Lipid	Pregnenolone Steroids	HMDB00774
cis-4-decenoylcarnitine (C10:1)	38178	Lipid	Fatty Acid Metabolism(Acyl Carnitine)	NA
2,3-dihydroxyisovalerate	38276	Xenobiotics	Food Component/Plant	HMDB12141
17-methylstearate (i19:0)	38296	Lipid	Fatty Acid, Branched	HMDB37397
12,13-DiHOME	38395	Lipid	Fatty Acid, Dihydroxy	HMDB04705
9,10-DiHOME	38399	Lipid	Fatty Acid, Dihydroxy	HMDB04704
stearoyl ethanolamide	38625	Lipid	Endocannabinoid	HMDB13078
cinnamoylglycine	38637	Xenobiotics	Food Component/Plant	HMDB11621
15-methylpalmitate (i17:0)	38768	Lipid	Fatty Acid, Branched	NA
1-(1-enyl-palmitoyl)-GPE (P-16:0)*	39270	Lipid	Lysoplasmalogen	NA
1-(1-enyl-stearoyl)-GPE (P-18:0)*	39271	Lipid	Lysoplasmalogen	NA
alpha-CEHC glucuronide*	39346	Cofactors and Vitamins	Tocopherol Metabolism	NA
tauroursodeoxycholate	39378	Lipid	Secondary Bile Acid Metabolism	HMDB00874
glycoursodeoxycholate	39379	Lipid	Secondary Bile Acid Metabolism	HMDB00708
S-methylcysteine	39592	Amino Acid	Methionine, Cysteine, SAM and Taurine Metabolism	HMDB02108
7-methylurate	39598	Xenobiotics	Xanthine Metabolism	HMDB11107
glutarate (C5-DC)	396	Lipid	Fatty Acid, Dicarboxylate	HMDB00661
3-hydroxyhippurate	39600	Xenobiotics	Benzoate Metabolism	HMDB06116
ethyl glucuronide	39603	Xenobiotics	Chemical	HMDB10325
16-hydroxypalmitate	39609	Lipid	Fatty Acid, Monohydroxy	HMDB06294
N-oleoyltaurine	39732	Lipid	Endocannabinoid	NA
solanidine	39788	Xenobiotics	Food Component/Plant	HMDB03236
glycyrrhetinate	39789	Xenobiotics	Food Component/Plant	HMDB11628
eicosanodioate (C20-DC)	39831	Lipid	Fatty Acid, Dicarboxylate	NA
docosadioate (C22-DC)	39837	Lipid	Fatty Acid, Dicarboxylate	NA
carboxyethyl-GABA	40007	Amino Acid	Glutamate Metabolism	HMDB02201
4-hydroxy-2-oxoglutaric acid	40062	Lipid	Fatty Acid, Dicarboxylate	HMDB02070
L-urobilin	40173	Cofactors and Vitamins	Hemoglobin and Porphyrin Metabolism	HMDB04159
trimethylamine N-oxide	40406	Lipid	Phospholipid Metabolism	HMDB00925
N1-Methyl-2-pyridone-5-carboxamide	40469	Cofactors and Vitamins	Nicotinate and Nicotinamide Metabolism	HMDB04193
hydantoin-5-propionic acid	40473	Amino Acid	Histidine Metabolism	HMDB01212
2-oxindole-3-acetate	40479	Xenobiotics	Food Component/Plant	HMDB35514
dihydroferulic acid	40481	Xenobiotics	Food Component/Plant	NA
prolylglycine	40703	Peptide	Dipeptide	HMDB11178
pregnanediol-3-glucuronide	40708	Lipid	Progestin Steroids	HMDB10318
imidazole propionate	40730	Amino Acid	Histidine Metabolism	HMDB02271
2-stearoyl-GPE (18:0)*	41220	Lipid	Lysophospholipid	HMDB11129
alliin	41494	Xenobiotics	Food Component/Plant	HMDB33592
heme	41754	Cofactors and Vitamins	Hemoglobin and Porphyrin Metabolism	HMDB03178
succinimide	41888	Xenobiotics	Chemical	NA
lanthionine	42002	Xenobiotics	Chemical	NA
indoleacetylglutamine	42087	Amino Acid	Tryptophan Metabolism	HMDB13240
N-palmitoylglycine	42092	Lipid	Fatty Acid Metabolism(Acyl Glycine)	HMDB13034
phosphate	42109	Energy	Oxidative Phosphorylation	HMDB01429
S-1-pyrroline-5-carboxylate	42370	Amino Acid	Glutamate Metabolism	HMDB01301
2-aminobutyrate	42374	Amino Acid	Glutathione Metabolism	HMDB00650
gamma-CEHC glucuronide*	42381	Cofactors and Vitamins	Tocopherol Metabolism	NA
S-adenosylhomocysteine (SAH)	42382	Amino Acid	Methionine, Cysteine, SAM and Taurine Metabolism	HMDB00939
1-stearoyl-GPE (18:0)	42398	Lipid	Lysophospholipid	HMDB11130
erythronate*	42420	Carbohydrate	Aminosugar Metabolism	HMDB00613
1-palmitoyl-2-linoleoyl-GPC (16:0/18:2)	42446	Lipid	Phosphatidylcholine (PC)	HMDB07973
1-stearoyl-2-oleoyl-GPE (18:0/18:1)	42448	Lipid	Phosphatidylethanolamine (PE)	HMDB08993
1-palmitoyl-2-linoleoyl-GPE (16:0/18:2)	42449	Lipid	Phosphatidylethanolamine (PE)	HMDB05322
1-stearoyl-2-arachidonoyl-GPC (18:0/20:4)	42450	Lipid	Phosphatidylcholine (PC)	HMDB08048
sphingomyelin (d18:2/16:0, d18:1/16:1)*	42459	Lipid	Sphingolipid Metabolism	NA
sphingomyelin (d18:1/14:0, d16:1/16:0)*	42463	Lipid	Sphingolipid Metabolism	HMDB12097
2-hydroxydecanoate	42489	Lipid	Fatty Acid, Monohydroxy	NA
glycohyocholate	42574	Lipid	Secondary Bile Acid Metabolism	NA
N-methyltaurine	42989	Amino Acid	Methionine, Cysteine, SAM and Taurine Metabolism	NA
6-oxopiperidine-2-carboxylate	43231	Amino Acid	Lysine Metabolism	HMDB61705
S-allylcysteine	43239	Xenobiotics	Food Component/Plant	HMDB34323
N-delta-acetylornithine	43249	Amino Acid	Urea cycle; Arginine and Proline Metabolism	NA
N-acetyl-1-methylhistidine*	43255	Amino Acid	Histidine Metabolism	NA
N-acetyl-3-methylhistidine*	43256	Amino Acid	Histidine Metabolism	NA
acisoga	43258	Amino Acid	Polyamine Metabolism	NA
3-hydroxybutyrylcarnitine (1)	43264	Lipid	Fatty Acid Metabolism(Acyl Carnitine)	HMDB13127
2-aminophenol sulfate	43266	Xenobiotics	Chemical	HMDB61116
2-aminooctanoate	43343	Lipid	Fatty Acid, Amino	HMDB00991
indolin-2-one	43374	Xenobiotics	Food Component/Plant	NA
S-methylcysteine sulfoxide	43378	Amino Acid	Methionine, Cysteine, SAM and Taurine Metabolism	HMDB29432
2-piperidinone	43400	Xenobiotics	Food Component/Plant	HMDB11749
dimethyl sulfone	43424	Xenobiotics	Chemical	HMDB04983
N-acetylcarnosine	43488	Amino Acid	Histidine Metabolism	HMDB12881
formiminoglutamate	43493	Amino Acid	Histidine Metabolism	HMDB00854
3b-hydroxy-5-cholenoic acid	43507	Lipid	Secondary Bile Acid Metabolism	HMDB00308
N-formylanthranilic acid	43549	Amino Acid	Tryptophan Metabolism	HMDB04089
5-(galactosylhydroxy)-L-lysine	43582	Amino Acid	Lysine Metabolism	NA
N2,N5-diacetylornithine	43591	Amino Acid	Urea cycle; Arginine and Proline Metabolism	NA
2-aminoheptanoate	43761	Lipid	Fatty Acid, Amino	NA
guanidinoacetate	43802	Amino Acid	Creatine Metabolism	HMDB00128
bilirubin (Z,Z)	43807	Cofactors and Vitamins	Hemoglobin and Porphyrin Metabolism	HMDB00054
gamma-glutamylvaline	43829	Peptide	Gamma-glutamyl Amino Acid	HMDB11172
glycerol 3-phosphate	43847	Lipid	Glycerolipid Metabolism	HMDB00126
aspartate	443	Amino Acid	Alanine and Aspartate Metabolism	HMDB00191
3-methyl-2-oxobutyrate	44526	Amino Acid	Leucine, Isoleucine and Valine Metabolism	HMDB00019
3-methoxytyramine sulfate	44618	Amino Acid	Tyrosine Metabolism	NA
4-acetylphenol sulfate	44620	Xenobiotics	Drug - Other	NA
1-(1-enyl-oleoyl)-GPE (P-18:1)*	44621	Lipid	Lysoplasmalogen	NA
isovalerate (i5:0)	44656	Amino Acid	Leucine, Isoleucine and Valine Metabolism	HMDB00718
glutarylcarnitine (C5-DC)	44664	Amino Acid	Lysine Metabolism	HMDB13130
docosahexaenoate (DHA; 22:6n3)	44675	Lipid	Polyunsaturated Fatty Acid (n3 and n6)	HMDB02183
palmitoylcarnitine (C16)	44681	Lipid	Fatty Acid Metabolism(Acyl Carnitine)	HMDB00222
maltotriose	44688	Carbohydrate	Glycogen Metabolism	HMDB01262
gamma-glutamylmethionine	44872	Peptide	Gamma-glutamyl Amino Acid	HMDB29155
gamma-CEHC	44876	Cofactors and Vitamins	Tocopherol Metabolism	HMDB01931
N-palmitoyl-sphingosine (d18:1/16:0)	44877	Lipid	Ceramides	HMDB04949
methionine sulfone	44878	Amino Acid	Methionine, Cysteine, SAM and Taurine Metabolism	NA
2-methylbutyrylcarnitine (C5)	45095	Amino Acid	Leucine, Isoleucine and Valine Metabolism	HMDB00378
N-acetylalliin	45404	Xenobiotics	Food Component/Plant	NA
O-sulfo-L-tyrosine	45413	Xenobiotics	Chemical	NA
3-(3-hydroxyphenyl)propionate sulfate	45415	Xenobiotics	Benzoate Metabolism	NA
1-linolenoyl-GPC (18:3)*	45951	Lipid	Lysophospholipid	HMDB10388
1-oleoyl-GPG (18:1)*	45968	Lipid	Lysophospholipid	NA
guaiacol sulfate	46111	Xenobiotics	Benzoate Metabolism	HMDB60013
21-hydroxypregnenolone disulfate	46115	Lipid	Pregnenolone Steroids	NA
mannitol/sorbitol	46142	Carbohydrate	Fructose, Mannose and Galactose Metabolism	HMDB00247
methyl glucopyranoside (alpha + beta)	46144	Xenobiotics	Food Component/Plant	NA
4-methylcatechol sulfate	46146	Xenobiotics	Benzoate Metabolism	NA
3-methyl catechol sulfate (1)	46165	Xenobiotics	Benzoate Metabolism	NA
5alpha-pregnan-3(alpha or beta),20beta-diol disulfate	46172	Lipid	Progestin Steroids	NA
aconitate [cis or trans]	46173	Energy	TCA Cycle	NA
linoleoylcarnitine (C18:2)*	46223	Lipid	Fatty Acid Metabolism(Acyl Carnitine)	HMDB06469
pyroglutamine*	46225	Amino Acid	Glutamate Metabolism	NA
N-acetylglucosamine/N-acetylgalactosamine	46539	Carbohydrate	Aminosugar Metabolism	HMDB00215
3-methylglutarylcarnitine (2)	46548	Amino Acid	Leucine, Isoleucine and Valine Metabolism	HMDB00552
oleoyl-linoleoyl-glycerol (18:1/18:2) [1]	46798	Lipid	Diacylglycerol	HMDB07219
oleoyl-linoleoyl-glycerol (18:1/18:2) [2]	46799	Lipid	Diacylglycerol	HMDB07219
gulonate*	46957	Cofactors and Vitamins	Ascorbate and Aldarate Metabolism	HMDB03290
sulfate*	46960	Xenobiotics	Chemical	HMDB01448
N-methylpipecolate	47101	Xenobiotics	Bacterial/Fungal	NA
etiocholanolone glucuronide	47112	Lipid	Androgenic Steroids	HMDB04484
ferulic acid 4-sulfate	47114	Xenobiotics	Food Component/Plant	HMDB29200
9-hydroxystearate	47120	Lipid	Fatty Acid, Monohydroxy	HMDB61661
5alpha-androstan-3alpha,17beta-diol 17-glucuronide	47132	Lipid	Androgenic Steroids	NA
11-ketoetiocholanolone glucuronide	47135	Lipid	Androgenic Steroids	NA
N-acetyl-S-allyl-L-cysteine	47136	Xenobiotics	Food Component/Plant	NA
sphingomyelin (d18:1/24:1, d18:2/24:0)*	47153	Lipid	Sphingolipid Metabolism	HMDB12107
sphingomyelin (d18:2/14:0, d18:1/14:1)*	47154	Lipid	Sphingolipid Metabolism	NA
alpha-CEHC sulfate	47666	Cofactors and Vitamins	Tocopherol Metabolism	NA
bilirubin (E,Z or Z,E)*	47886	Cofactors and Vitamins	Hemoglobin and Porphyrin Metabolism	HMDB00488
1-methylguanidine	48114	Amino Acid	Guanidino and Acetamido Metabolism	HMDB01522
N6-succinyladenosine	48130	Nucleotide	Purine Metabolism, Adenine containing	HMDB00912
N-acetylglucosaminylasparagine	48149	Carbohydrate	Aminosugar Metabolism	HMDB00489
glucose	48152	Carbohydrate	Glycolysis, Gluconeogenesis, and Pyruvate Metabolism	HMDB00122
mannose	48153	Carbohydrate	Fructose, Mannose and Galactose Metabolism	HMDB00169
myristoleoylcarnitine (C14:1)*	48182	Lipid	Fatty Acid Metabolism(Acyl Carnitine)	NA
N-acetyltaurine	48187	Amino Acid	Methionine, Cysteine, SAM and Taurine Metabolism	NA
fructose	48195	Carbohydrate	Fructose, Mannose and Galactose Metabolism	HMDB00660
arabonate/xylonate	48255	Carbohydrate	Pentose Metabolism	NA
1-oleoyl-GPC (18:1)	48258	Lipid	Lysophospholipid	HMDB02815
N1-methylinosine	48351	Nucleotide	Purine Metabolism, (Hypo)Xanthine/Inosine containing	HMDB02721
pregnanolone/allopregnanolone sulfate	48394	Lipid	Progestin Steroids	NA
dimethyl sulfoxide (DMSO)	48404	Xenobiotics	Chemical	HMDB02151
dopamine 3-O-sulfate	48407	Amino Acid	Tyrosine Metabolism	HMDB06275
tyramine O-sulfate	48408	Amino Acid	Tyrosine Metabolism	HMDB06409
phenylacetylcarnitine	48425	Peptide	Acetylated Peptides	NA
pyrraline	48428	Xenobiotics	Food Component/Plant	HMDB33143
methyl-4-hydroxybenzoate sulfate	48429	Xenobiotics	Benzoate Metabolism	NA
N-formylphenylalanine	48433	Amino Acid	Tyrosine Metabolism	NA
N-acetylcitrulline	48434	Amino Acid	Urea cycle; Arginine and Proline Metabolism	HMDB00856
4-hydroxychlorothalonil	48441	Xenobiotics	Chemical	NA
4-vinylguaiacol sulfate	48442	Xenobiotics	Food Component/Plant	NA
3-hydroxypyridine sulfate	48448	Xenobiotics	Chemical	NA
propyl 4-hydroxybenzoate sulfate	48460	Xenobiotics	Benzoate Metabolism	NA
sphingomyelin (d18:1/20:0, d16:1/22:0)*	48490	Lipid	Sphingolipid Metabolism	HMDB12102
sphingomyelin (d18:1/20:1, d18:2/20:0)*	48491	Lipid	Sphingolipid Metabolism	NA
behenoyl sphingomyelin (d18:1/22:0)*	48492	Lipid	Sphingolipid Metabolism	HMDB12103
sphingomyelin (d18:1/22:1, d18:2/22:0, d16:1/24:1)*	48493	Lipid	Sphingolipid Metabolism	HMDB12104
acesulfame	48569	Xenobiotics	Food Component/Plant	HMDB33585
2-acetamidophenol sulfate	48580	Xenobiotics	Drug - Analgesics, Anesthetics	NA
umbelliferone sulfate	48674	Xenobiotics	Food Component/Plant	NA
3-acetylphenol sulfate	48693	Xenobiotics	Chemical	NA
6-hydroxyindole sulfate	48698	Xenobiotics	Chemical	NA
eugenol sulfate	48715	Xenobiotics	Food Component/Plant	NA
N-acetylkynurenine (2)	48757	Amino Acid	Tryptophan Metabolism	NA
1,2,3-benzenetriol sulfate (2)	48762	Xenobiotics	Chemical	NA
3-methoxycatechol sulfate (1)	48763	Xenobiotics	Benzoate Metabolism	NA
C-glycosyltryptophan	48782	Amino Acid	Tryptophan Metabolism	NA
p-cresol-glucuronide*	48841	Amino Acid	Tyrosine Metabolism	HMDB11686
arabitol/xylitol	48885	Carbohydrate	Pentose Metabolism	NA
pyruvate	48990	Carbohydrate	Glycolysis, Gluconeogenesis, and Pyruvate Metabolism	HMDB00243
isoeugenol sulfate	48997	Xenobiotics	Food Component/Plant	NA
1-lignoceroyl-GPC (24:0)	49617	Lipid	Lysophospholipid	HMDB10405
alpha-ketobutyrate	4968	Amino Acid	Methionine, Cysteine, SAM and Taurine Metabolism	HMDB00005
dimethylglycine	5086	Amino Acid	Glycine, Serine and Threonine Metabolism	HMDB00092
asparagine	512	Amino Acid	Alanine and Aspartate Metabolism	HMDB00168
creatinine	513	Amino Acid	Creatine Metabolism	HMDB00562
cytidine	514	Nucleotide	Pyrimidine Metabolism, Cytidine containing	HMDB00089
glycosyl-N-stearoyl-sphingosine (d18:1/18:0)	52234	Lipid	Ceramides	NA
2-hydroxybutyrate/2-hydroxyisobutyrate	52281	Amino Acid	Glutathione Metabolism	NA
oleate/vaccenate (18:1)	52285	Lipid	Long Chain Fatty Acid	NA
N-carbamoylalanine	52340	Amino Acid	Alanine and Aspartate Metabolism	NA
1-palmitoleoylglycerol (16:1)*	52431	Lipid	Monoacylglycerol	HMDB11565
sphingomyelin (d17:1/16:0, d18:1/15:0, d16:1/17:0)*	52433	Lipid	Sphingolipid Metabolism	NA
palmitoyl dihydrosphingomyelin (d18:0/16:0)*	52434	Lipid	Sphingolipid Metabolism	NA
sphingomyelin (d18:2/23:0, d18:1/23:1, d17:1/24:1)*	52435	Lipid	Sphingolipid Metabolism	NA
tricosanoyl sphingomyelin (d18:1/23:0)*	52436	Lipid	Sphingolipid Metabolism	HMDB12105
sphingomyelin (d18:2/24:1, d18:1/24:2)*	52437	Lipid	Sphingolipid Metabolism	NA
1-stearoyl-2-oleoyl-GPC (18:0/18:1)	52438	Lipid	Phosphatidylcholine (PC)	HMDB08038
1-stearoyl-2-linoleoyl-GPE (18:0/18:2)*	52446	Lipid	Phosphatidylethanolamine (PE)	HMDB08994
1-stearoyl-2-arachidonoyl-GPE (18:0/20:4)	52447	Lipid	Phosphatidylethanolamine (PE)	HMDB09003
1-stearoyl-2-arachidonoyl-GPI (18:0/20:4)	52449	Lipid	Phosphatidylinositol (PI)	HMDB09815
1-palmitoyl-2-linoleoyl-GPI (16:0/18:2)	52450	Lipid	Phosphatidylinositol (PI)	HMDB09784
1-stearoyl-2-linoleoyl-GPC (18:0/18:2)*	52452	Lipid	Phosphatidylcholine (PC)	HMDB08039
1-palmitoyl-2-dihomo-linolenoyl-GPC (16:0/20:3n3 or 6)*	52454	Lipid	Phosphatidylcholine (PC)	NA
1-palmitoyl-2-oleoyl-GPC (16:0/18:1)	52461	Lipid	Phosphatidylcholine (PC)	HMDB07972
1-palmitoyl-2-arachidonoyl-GPC (16:0/20:4n6)	52462	Lipid	Phosphatidylcholine (PC)	HMDB07982
1-palmitoyl-2-arachidonoyl-GPE (16:0/20:4)*	52464	Lipid	Phosphatidylethanolamine (PE)	HMDB05323
1-palmitoyl-2-docosahexaenoyl-GPE (16:0/22:6)*	52465	Lipid	Phosphatidylethanolamine (PE)	HMDB05324
1-stearoyl-2-docosahexaenoyl-GPE (18:0/22:6)*	52466	Lipid	Phosphatidylethanolamine (PE)	HMDB05334
1-palmitoyl-2-arachidonoyl-GPI (16:0/20:4)*	52467	Lipid	Phosphatidylinositol (PI)	HMDB09789
1-stearoyl-2-linoleoyl-GPI (18:0/18:2)	52468	Lipid	Phosphatidylinositol (PI)	HMDB09809
1-palmitoyl-2-palmitoleoyl-GPC (16:0/16:1)*	52470	Lipid	Phosphatidylcholine (PC)	HMDB07969
gamma-tocopherol/beta-tocopherol	52473	Cofactors and Vitamins	Tocopherol Metabolism	NA
1-(1-enyl-palmitoyl)-GPC (P-16:0)*	52474	Lipid	Lysoplasmalogen	HMDB10407
1-(1-enyl-stearoyl)-2-arachidonoyl-GPE (P-18:0/20:4)*	52475	Lipid	Plasmalogen	HMDB05779
1-(1-enyl-palmitoyl)-2-oleoyl-GPE (P-16:0/18:1)*	52477	Lipid	Plasmalogen	HMDB11342
1-(1-enyl-palmitoyl)-2-oleoyl-GPC (P-16:0/18:1)*	52478	Lipid	Plasmalogen	NA
sphingomyelin (d18:1/21:0, d17:1/22:0, d16:1/23:0)*	52495	Lipid	Sphingolipid Metabolism	NA
2'-deoxyuridine	52602	Nucleotide	Pyrimidine Metabolism, Uracil containing	HMDB00012
1,2-dilinoleoyl-GPC (18:2/18:2)	52603	Lipid	Phosphatidylcholine (PC)	HMDB08138
N-palmitoyl-sphinganine (d18:0/16:0)	52604	Lipid	Sphingolipid Metabolism	HMDB11760
1-palmitoyl-2-docosahexaenoyl-GPC (16:0/22:6)	52610	Lipid	Phosphatidylcholine (PC)	HMDB07991
1-stearoyl-2-docosahexaenoyl-GPC (18:0/22:6)	52611	Lipid	Phosphatidylcholine (PC)	HMDB08057
1-(1-enyl-stearoyl)-2-oleoyl-GPE (P-18:0/18:1)	52614	Lipid	Plasmalogen	HMDB11375
sphingomyelin (d18:1/17:0, d17:1/18:0, d19:1/16:0)	52615	Lipid	Sphingolipid Metabolism	NA
1-palmitoyl-2-stearoyl-GPC (16:0/18:0)	52616	Lipid	Phosphatidylcholine (PC)	HMDB07970
1-stearoyl-2-oleoyl-GPG (18:0/18:1)	52623	Lipid	Phosphatidylglycerol (PG)	NA
palmitoyl-linoleoyl-glycerol (16:0/18:2) [1]*	52633	Lipid	Diacylglycerol	HMDB07103
palmitoyl-linoleoyl-glycerol (16:0/18:2) [2]*	52634	Lipid	Diacylglycerol	HMDB07103
1-palmitoyl-2-oleoyl-GPI (16:0/18:1)*	52669	Lipid	Phosphatidylinositol (PI)	HMDB09783
1-(1-enyl-palmitoyl)-2-arachidonoyl-GPE (P-16:0/20:4)*	52673	Lipid	Plasmalogen	HMDB11352
1-(1-enyl-palmitoyl)-2-linoleoyl-GPE (P-16:0/18:2)*	52677	Lipid	Plasmalogen	HMDB11343
1-(1-enyl-palmitoyl)-2-linoleoyl-GPC (P-16:0/18:2)*	52682	Lipid	Plasmalogen	HMDB11211
1-(1-enyl-palmitoyl)-2-arachidonoyl-GPC (P-16:0/20:4)*	52689	Lipid	Plasmalogen	HMDB11220
1-linoleoyl-GPA (18:2)*	52690	Lipid	Lysophospholipid	HMDB07856
1-oleoyl-2-docosahexaenoyl-GPC (18:1/22:6)*	52697	Lipid	Phosphatidylcholine (PC)	HMDB08123
lactate	527	Carbohydrate	Glycolysis, Gluconeogenesis, and Pyruvate Metabolism	HMDB00190
1-linoleoyl-2-arachidonoyl-GPC (18:2/20:4n6)*	52710	Lipid	Phosphatidylcholine (PC)	HMDB08147
1-(1-enyl-palmitoyl)-2-palmitoleoyl-GPC (P-16:0/16:1)*	52713	Lipid	Plasmalogen	HMDB11207
1-(1-enyl-palmitoyl)-2-palmitoyl-GPC (P-16:0/16:0)*	52716	Lipid	Plasmalogen	HMDB11206
phenol glucuronide	52747	Amino Acid	Tyrosine Metabolism	HMDB60014
1-(1-enyl-stearoyl)-2-linoleoyl-GPE (P-18:0/18:2)*	52748	Lipid	Plasmalogen	HMDB11376
alpha-ketoglutarate	528	Energy	TCA Cycle	HMDB00208
5-hydroxyindole sulfate	52914	Amino Acid	Tryptophan Metabolism	NA
2-hydroxylaurate	52916	Lipid	Fatty Acid, Monohydroxy	NA
phenylacetylglutamate	52925	Peptide	Acetylated Peptides	HMDB59772
3,4-methyleneheptanoylcarnitine	52929	Lipid	Fatty Acid Metabolism(Acyl Carnitine)	NA
palmitoylcholine	52944	Lipid	Fatty Acid Metabolism (Acyl Choline)	NA
glycochenodeoxycholate sulfate	52974	Lipid	Primary Bile Acid Metabolism	NA
glycodeoxycholate sulfate	52975	Lipid	Secondary Bile Acid Metabolism	NA
glycocholate glucuronide (1)	52977	Lipid	Primary Bile Acid Metabolism	NA
glycochenodeoxycholate glucuronide (1)	52983	Lipid	Primary Bile Acid Metabolism	NA
3-hydroxybutyrylcarnitine (2)	52984	Lipid	Fatty Acid Metabolism(Acyl Carnitine)	HMDB13127
adipoylcarnitine (C6-DC)	52988	Lipid	Fatty Acid Metabolism(Acyl Carnitine)	HMDB61677
glutamine	53	Amino Acid	Glutamate Metabolism	HMDB00641
lactosyl-N-palmitoyl-sphingosine (d18:1/16:0)	53010	Lipid	Ceramides	NA
glycosyl-N-palmitoyl-sphingosine (d18:1/16:0)	53013	Lipid	Ceramides	NA
3,4-methyleneheptanoate	53026	Xenobiotics	Food Component/Plant	NA
methylsuccinoylcarnitine	53031	Amino Acid	Leucine, Isoleucine and Valine Metabolism	NA
3-hydroxy-3-methylglutarate	531	Lipid	Mevalonate Metabolism	HMDB00355
1-linoleoyl-2-linolenoyl-GPC (18:2/18:3)*	53176	Lipid	Phosphatidylcholine (PC)	HMDB08141
1-palmitoleoyl-2-linolenoyl-GPC (16:1/18:3)*	53180	Lipid	Phosphatidylcholine (PC)	HMDB08008
1-myristoyl-2-arachidonoyl-GPC (14:0/20:4)*	53195	Lipid	Phosphatidylcholine (PC)	HMDB07883
1-oleoyl-2-docosahexaenoyl-GPE (18:1/22:6)*	53209	Lipid	Phosphatidylethanolamine (PE)	NA
palmitoleoylcarnitine (C16:1)*	53223	Lipid	Fatty Acid Metabolism(Acyl Carnitine)	NA
pimeloylcarnitine/3-methyladipoylcarnitine (C7-DC)	53224	Lipid	Fatty Acid Metabolism(Acyl Carnitine)	NA
3-hydroxyhexanoate	53230	Lipid	Fatty Acid, Monohydroxy	NA
thioproline	53231	Xenobiotics	Chemical	NA
5-bromotryptophan	53242	Amino Acid	Tryptophan Metabolism	NA
caffeic acid sulfate	53254	Xenobiotics	Xanthine Metabolism	HMDB41708
eicosapentaenoylcholine	53258	Lipid	Fatty Acid Metabolism (Acyl Choline)	NA
oleoylcholine	53260	Lipid	Fatty Acid Metabolism (Acyl Choline)	NA
arachidonoylcholine	53261	Lipid	Fatty Acid Metabolism (Acyl Choline)	NA
dihomo-linolenoyl-choline	53262	Lipid	Fatty Acid Metabolism (Acyl Choline)	NA
docosahexaenoylcholine	53263	Lipid	Fatty Acid Metabolism (Acyl Choline)	NA
tryptophan	54	Amino Acid	Tryptophan Metabolism	HMDB00929
4-hydroxyphenylacetate	541	Amino Acid	Phenylalanine Metabolism	HMDB00020
3-hydroxybutyrate (BHBA)	542	Lipid	Ketone Bodies	HMDB00357
3beta-hydroxy-5-cholestenoate	54805	Lipid	Sterol	NA
1-linoleoyl-GPG (18:2)*	54885	Lipid	Lysophospholipid	NA
hexanoylglutamine	54907	Lipid	Fatty Acid Metabolism (Acyl Glutamine)	NA
vanillactate	54910	Amino Acid	Tyrosine Metabolism	HMDB00913
beta-citrylglutamate	54923	Amino Acid	Glutamate Metabolism	NA
oleoyl-oleoyl-glycerol (18:1/18:1) [1]*	54945	Lipid	Diacylglycerol	HMDB07218
oleoyl-oleoyl-glycerol (18:1/18:1) [2]*	54946	Lipid	Diacylglycerol	HMDB07218
linoleoyl-arachidonoyl-glycerol (18:2/20:4) [1]*	54955	Lipid	Diacylglycerol	HMDB07257
linoleoyl-arachidonoyl-glycerol (18:2/20:4) [2]*	54956	Lipid	Diacylglycerol	HMDB07257
oleoyl-arachidonoyl-glycerol (18:1/20:4) [1]*	54960	Lipid	Diacylglycerol	HMDB07228
oleoyl-arachidonoyl-glycerol (18:1/20:4) [2]*	54961	Lipid	Diacylglycerol	HMDB07228
palmitoleoyl-linoleoyl-glycerol (16:1/18:2) [1]*	54967	Lipid	Diacylglycerol	HMDB07132
linoleoyl-linoleoyl-glycerol (18:2/18:2) [1]*	54968	Lipid	Diacylglycerol	HMDB07248
N-stearoyl-sphingosine (d18:1/18:0)*	54979	Lipid	Ceramides	HMDB04950
beta-alanine	55	Nucleotide	Pyrimidine Metabolism, Uracil containing	HMDB00056
gamma-glutamyl-alpha-lysine	55015	Peptide	Gamma-glutamyl Amino Acid	NA
4-hydroxyphenylacetylglutamine	55017	Peptide	Acetylated Peptides	NA
2-oxoarginine*	55072	Amino Acid	Urea cycle; Arginine and Proline Metabolism	HMDB04225
adenine	554	Nucleotide	Purine Metabolism, Adenine containing	HMDB00034
adenosine	555	Nucleotide	Purine Metabolism, Adenine containing	HMDB00050
cystine	56	Amino Acid	Methionine, Cysteine, SAM and Taurine Metabolism	HMDB00192
phenylpyruvate	566	Amino Acid	Phenylalanine Metabolism	HMDB00205
caffeine	569	Xenobiotics	Xanthine Metabolism	HMDB01847
glutamate	57	Amino Acid	Glutamate Metabolism	HMDB00148
cytosine	573	Nucleotide	Pyrimidine Metabolism, Cytidine containing	HMDB00630
lignoceroyl sphingomyelin (d18:1/24:0)	57330	Lipid	Sphingolipid Metabolism	NA
behenoyl dihydrosphingomyelin (d18:0/22:0)*	57331	Lipid	Sphingolipid Metabolism	HMDB12091
myristoyl dihydrosphingomyelin (d18:0/14:0)*	57365	Lipid	Sphingolipid Metabolism	HMDB12085
lactosyl-N-nervonoyl-sphingosine (d18:1/24:1)*	57370	Lipid	Ceramides	NA
myristoyl-linoleoyl-glycerol (14:0/18:2) [1]*	57407	Lipid	Diacylglycerol	NA
N-stearoyl-sphingadienine (d18:2/18:0)*	57417	Lipid	Ceramides	NA
glycosyl-N-behenoyl-sphingadienine (d18:2/22:0)*	57421	Lipid	Ceramides	NA
lactosyl-N-behenoyl-sphingosine (d18:1/22:0)*	57422	Lipid	Sphingolipid Metabolism	NA
hexadecasphingosine (d16:1)*	57428	Lipid	Sphingolipid Metabolism	NA
N-palmitoyl-heptadecasphingosine (d17:1/16:0)*	57430	Lipid	Sphingolipid Metabolism	NA
ceramide (d18:2/24:1, d18:1/24:2)*	57443	Lipid	Ceramides	NA
glycosyl ceramide (d18:1/23:1, d17:1/24:1)*	57448	Lipid	Ceramides	NA
glycosyl ceramide (d18:2/24:1, d18:1/24:2)*	57453	Lipid	Ceramides	NA
argininate*	57461	Amino Acid	Urea cycle; Arginine and Proline Metabolism	HMDB03148
linoleoylcholine*	57463	Lipid	Fatty Acid Metabolism (Acyl Choline)	NA
stearoylcholine*	57464	Lipid	Fatty Acid Metabolism (Acyl Choline)	NA
sphingomyelin (d18:0/18:0, d19:0/17:0)*	57473	Lipid	Sphingolipid Metabolism	HMDB12087
sphingomyelin (d18:2/18:1)*	57474	Lipid	Sphingolipid Metabolism	NA
sphingomyelin (d18:1/19:0, d19:1/18:0)*	57475	Lipid	Sphingolipid Metabolism	NA
sphingomyelin (d18:0/20:0, d16:0/22:0)*	57476	Lipid	Sphingolipid Metabolism	NA
sphingomyelin (d18:1/22:2, d18:2/22:1, d16:1/24:2)*	57477	Lipid	Sphingolipid Metabolism	NA
sphingomyelin (d18:1/25:0, d19:0/24:1, d20:1/23:0, d19:1/24:0)*	57478	Lipid	Sphingolipid Metabolism	NA
sphingomyelin (d18:2/24:2)*	57479	Lipid	Sphingolipid Metabolism	NA
sphingomyelin (d18:2/21:0, d16:2/23:0)*	57480	Lipid	Sphingolipid Metabolism	NA
sphingomyelin (d18:1/20:2, d18:2/20:1, d16:1/22:2)*	57481	Lipid	Sphingolipid Metabolism	NA
sphingomyelin (d18:2/23:1)*	57482	Lipid	Sphingolipid Metabolism	NA
sphingomyelin (d17:2/16:0, d18:2/15:0)*	57483	Lipid	Sphingolipid Metabolism	NA
arabinose	575	Carbohydrate	Pentose Metabolism	HMDB00646
linolenoylcarnitine (C18:3)*	57511	Lipid	Fatty Acid Metabolism(Acyl Carnitine)	NA
margaroylcarnitine (C17)*	57512	Lipid	Fatty Acid Metabolism(Acyl Carnitine)	HMDB06210
arachidoylcarnitine (C20)*	57513	Lipid	Fatty Acid Metabolism(Acyl Carnitine)	HMDB06460
behenoylcarnitine (C22)*	57514	Lipid	Fatty Acid Metabolism(Acyl Carnitine)	NA
lignoceroylcarnitine (C24)*	57515	Lipid	Fatty Acid Metabolism(Acyl Carnitine)	NA
cerotoylcarnitine (C26)*	57516	Lipid	Fatty Acid Metabolism(Acyl Carnitine)	HMDB06347
ximenoylcarnitine (C26:1)*	57517	Lipid	Fatty Acid Metabolism(Acyl Carnitine)	NA
arachidonoylcarnitine (C20:4)	57518	Lipid	Fatty Acid Metabolism(Acyl Carnitine)	NA
eicosenoylcarnitine (C20:1)*	57519	Lipid	Fatty Acid Metabolism(Acyl Carnitine)	NA
dihomo-linoleoylcarnitine (C20:2)*	57520	Lipid	Fatty Acid Metabolism(Acyl Carnitine)	NA
dihomo-linolenoylcarnitine (20:3n3 or 6)*	57521	Lipid	Fatty Acid Metabolism(Acyl Carnitine)	NA
adrenoylcarnitine (C22:4)*	57528	Lipid	Fatty Acid Metabolism(Acyl Carnitine)	NA
nervonoylcarnitine (C24:1)*	57531	Lipid	Fatty Acid Metabolism(Acyl Carnitine)	NA
2,3-dihydroxy-2-methylbutyrate	57547	Amino Acid	Leucine, Isoleucine and Valine Metabolism	HMDB29576
2'-O-methylcytidine	57554	Nucleotide	Pyrimidine Metabolism, Cytidine containing	NA
perfluorooctanesulfonic acid (PFOS)	57564	Xenobiotics	Chemical	HMDB59586
isoursodeoxycholate	57577	Lipid	Secondary Bile Acid Metabolism	HMDB00686
beta-cryptoxanthin	57591	Cofactors and Vitamins	Vitamin A Metabolism	HMDB33844
glycosyl ceramide (d18:1/20:0, d16:1/22:0)*	57595	Lipid	Ceramides	NA
carotene diol (1)	57635	Cofactors and Vitamins	Vitamin A Metabolism	NA
carotene diol (2)	57636	Cofactors and Vitamins	Vitamin A Metabolism	NA
carotene diol (3)	57637	Cofactors and Vitamins	Vitamin A Metabolism	NA
hexadecadienoate (16:2n6)	57652	Lipid	Polyunsaturated Fatty Acid (n3 and n6)	HMDB00477
2'-O-methyluridine	57655	Nucleotide	Pyrimidine Metabolism, Uracil containing	NA
heneicosapentaenoate (21:5n3)	57658	Lipid	Polyunsaturated Fatty Acid (n3 and n6)	NA
N-oleoylserine	57664	Lipid	Endocannabinoid	NA
N-trimethyl 5-aminovalerate	57687	Amino Acid	Lysine Metabolism	NA
HWESASXX*	57711	Peptide	Polypeptide	NA
glycocholenate sulfate*	57741	Lipid	Secondary Bile Acid Metabolism	NA
phenylacetate	57745	Amino Acid	Phenylalanine Metabolism	HMDB00209
anthranilate	57746	Amino Acid	Tryptophan Metabolism	HMDB01123
3-methylglutaconate	57747	Amino Acid	Leucine, Isoleucine and Valine Metabolism	HMDB00522
1H-indole-7-acetic acid	57783	Xenobiotics	Bacterial/Fungal	NA
nisinate (24:6n3)	57810	Lipid	Polyunsaturated Fatty Acid (n3 and n6)	HMDB02007
(N(1) + N(8))-acetylspermidine	57814	Amino Acid	Polyamine Metabolism	NA
glycine	58	Amino Acid	Glycine, Serine and Threonine Metabolism	HMDB00123
gluconate	587	Xenobiotics	Food Component/Plant	HMDB00625
histidine	59	Amino Acid	Histidine Metabolism	HMDB00177
hypotaurine	590	Amino Acid	Methionine, Cysteine, SAM and Taurine Metabolism	HMDB00965
nicotinamide	594	Cofactors and Vitamins	Nicotinate and Nicotinamide Metabolism	HMDB01406
phytanate	598	Xenobiotics	Food Component/Plant	HMDB00801
corticosterone	5983	Lipid	Corticosteroids	HMDB01547
leucine	60	Amino Acid	Leucine, Isoleucine and Valine Metabolism	HMDB00687
dihydroorotate	601	Nucleotide	Pyrimidine Metabolism, Orotate containing	HMDB03349
uracil	605	Nucleotide	Pyrimidine Metabolism, Uracil containing	HMDB00300
uridine	606	Nucleotide	Pyrimidine Metabolism, Uracil containing	HMDB00296
trans-urocanate	607	Amino Acid	Histidine Metabolism	HMDB00301
2-aminoadipate	6146	Amino Acid	Lysine Metabolism	HMDB00510
1-cerotoyl-GPC (26:0)*	61505	Lipid	Lysophospholipid	HMDB29205
2-hydroxyphytanate*	61702	Lipid	Fatty Acid, Monohydroxy	NA
5-dodecenoylcarnitine (C12:1)	61769	Lipid	Fatty Acid Metabolism(Acyl Carnitine)	NA
5,6-dihydrouridine	61833	Nucleotide	Pyrimidine Metabolism, Uracil containing	NA
3-hydroxyoleate*	61843	Lipid	Fatty Acid, Monohydroxy	NA
androsterone glucuronide	61846	Lipid	Androgenic Steroids	HMDB02829
ribulonate/xylulonate*	61858	Carbohydrate	Pentose Metabolism	NA
octadecenedioate (C18:1-DC)*	61861	Lipid	Fatty Acid, Dicarboxylate	NA
hexadecenedioate (C16:1-DC)*	61862	Lipid	Fatty Acid, Dicarboxylate	NA
octadecenedioylcarnitine (C18:1-DC)*	61865	Lipid	Fatty Acid Metabolism(Acyl Carnitine)	NA
heptenedioate (C7:1-DC)*	61866	Lipid	Fatty Acid, Dicarboxylate	NA
octadecanedioylcarnitine (C18-DC)*	61867	Lipid	Fatty Acid Metabolism(Acyl Carnitine)	NA
1-ribosyl-imidazoleacetate*	61868	Amino Acid	Histidine Metabolism	HMDB02331
3-carboxy-4-methyl-5-pentyl-2-furanpropionate (3-Cmpfp)**	61871	Lipid	Fatty Acid, Dicarboxylate	NA
glucuronide of C10H18O2 (1)*	61881	Partially Characterized Molecules	Partially Characterized Molecules	NA
glucuronide of C10H18O2 (7)*	61887	Partially Characterized Molecules	Partially Characterized Molecules	NA
glucuronide of C14H22O4 (2)*	61970	Partially Characterized Molecules	Partially Characterized Molecules	NA
N-acetyl-2-aminooctanoate*	62059	Lipid	Fatty Acid, Amino	HMDB59745
hydroxyasparagine**	62060	Amino Acid	Alanine and Aspartate Metabolism	NA
3-hydroxystachydrine*	62062	Xenobiotics	Food Component/Plant	NA
3-hydroxybutyroylglycine**	62064	Lipid	Fatty Acid Metabolism(Acyl Glycine)	NA
glyco-alpha-muricholate**	62065	Lipid	Primary Bile Acid Metabolism	NA
glyco-beta-muricholate**	62066	Lipid	Primary Bile Acid Metabolism	NA
N-methylhydroxyproline**	62068	Amino Acid	Urea cycle; Arginine and Proline Metabolism	NA
3-hydroxyadipate*	62069	Lipid	Fatty Acid, Dicarboxylate	HMDB00345
perfluorooctanoate (PFOA)*	62071	Xenobiotics	Chemical	HMDB59587
alpha-ketoglutaramate**	62101	Amino Acid	Glutamate Metabolism	NA
cysteinylglycine disulfide*	62103	Amino Acid	Glutathione Metabolism	HMDB00709
gamma-glutamylcitrulline*	62104	Peptide	Gamma-glutamyl Amino Acid	NA
glycine conjugate of C10H12O2*	62145	Partially Characterized Molecules	Partially Characterized Molecules	NA
glycine conjugate of C10H14O2 (1)*	62146	Partially Characterized Molecules	Partially Characterized Molecules	NA
sphingomyelin (d17:1/14:0, d16:1/15:0)*	62152	Lipid	Sphingolipid Metabolism	NA
cholesterol	63	Lipid	Sterol	HMDB00067
phenylalanine	64	Amino Acid	Phenylalanine Metabolism	HMDB00159

## Sheet: Supplemental Table 3
Supplemental Table 3. Bivariate association tests for four modifiable risk factors: beta (p value)
	MIND diet	Physical activity	Smoking	Caffeine intake
MIND diet	1	0.03 (<0.01)	-0.48 (0.12)	0.03 (0.70)
Physical activity		1	-3.88 (0.02)	-0.35 (0.40)
Smoking			1	0.02 (<0.01)
Caffeine intake				1
The association tests were conducted by using linear mixed-effect model between two modifiable risk factors with two random intercepts of repeated measures and sibling relationship but without any other fixed covariates.

## Sheet: Supplemental Table 4
Supplemental Table 4. The full results of the association tests between each plasma metabolite and MIND diet score.
Biochemical Names	Compound ID	N	Beta	P	Adjusted P	FDR q	Super pathway	Sub-pathway	HMDB ID
carotene diol (1)	57635	923	0.0227769	1.36117e-10	1.03041e-07	1.03041e-07	Cofactors and Vitamins	Vitamin A Metabolism	NA
carotene diol (2)	57636	921	0.0244399	5.92069e-10	4.48196e-07	2.24098e-07	Cofactors and Vitamins	Vitamin A Metabolism	NA
S-methylcysteine sulfoxide	43378	923	0.0265923	1.58945e-08	1.20321e-05	3.74099e-06	Amino Acid	Methionine, Cysteine, SAM and Taurine Metabolism	HMDB29432
indolepropionate	32405	916	0.0310115	2.29991e-08	1.74103e-05	3.74099e-06	Amino Acid	Tryptophan Metabolism	HMDB02302
docosahexaenoate (DHA; 22:6n3)	44675	923	0.0228379	2.47093e-08	1.8705e-05	3.74099e-06	Lipid	Polyunsaturated Fatty Acid (n3 and n6)	HMDB02183
eicosapentaenoate (EPA; 20:5n3)	18467	923	0.0267681	4.93309e-08	3.73435e-05	6.22391e-06	Lipid	Polyunsaturated Fatty Acid (n3 and n6)	HMDB01999
heptenedioate (C7:1-DC)*	61866	912	-0.0180393	6.39731e-08	4.84277e-05	6.48016e-06	Lipid	Fatty Acid, Dicarboxylate	NA
3-phenylpropionate (hydrocinnamate)	15749	788	0.0413985	7.44126e-08	5.63304e-05	6.48016e-06	Xenobiotics	Benzoate Metabolism	HMDB00764
catechol sulfate	35320	923	0.0262537	7.70428e-08	5.83214e-05	6.48016e-06	Xenobiotics	Benzoate Metabolism	HMDB59724
beta-cryptoxanthin	57591	920	0.0292381	1.15305e-07	8.7286e-05	8.7286e-06	Cofactors and Vitamins	Vitamin A Metabolism	HMDB33844
3-carboxy-4-methyl-5-propyl-2-furanpropanoate (CMPF)	31787	923	0.0507611	3.06036e-07	0.000231669	2.10608e-05	Lipid	Fatty Acid, Dicarboxylate	HMDB61112
cinnamoylglycine	38637	857	0.0466199	1.01267e-06	0.000766593	6.38828e-05	Xenobiotics	Food Component/Plant	HMDB11621
stearidonate (18:4n3)	33969	922	0.0215231	2.677e-06	0.00202649	0.000155884	Lipid	Polyunsaturated Fatty Acid (n3 and n6)	HMDB06547
quinate	18335	911	0.0557616	4.6829e-06	0.00354496	0.000253211	Xenobiotics	Food Component/Plant	HMDB03072
sphingosine	17747	864	-0.0168522	7.8061e-06	0.00590922	0.000393948	Lipid	Sphingolipid Metabolism	HMDB00252
carotene diol (3)	57637	893	0.0191955	1.48799e-05	0.0112641	0.000671412	Cofactors and Vitamins	Vitamin A Metabolism	NA
myristoylcarnitine (C14)	33952	923	-0.0125618	1.52695e-05	0.011559	0.000671412	Lipid	Fatty Acid Metabolism(Acyl Carnitine)	HMDB05066
trigonelline (N'-methylnicotinate)	32401	923	0.0313585	1.65983e-05	0.0125649	0.000671412	Cofactors and Vitamins	Nicotinate and Nicotinamide Metabolism	HMDB00875
N6-carbamoylthreonyladenosine	35157	922	-0.0087983	1.68518e-05	0.0127568	0.000671412	Nucleotide	Purine Metabolism, Adenine containing	HMDB41623
1-stearoyl-2-docosahexaenoyl-GPC (18:0/22:6)	52611	923	0.0114331	1.81649e-05	0.0137508	0.00068754	Lipid	Phosphatidylcholine (PC)	HMDB08057
1-palmitoyl-2-docosahexaenoyl-GPC (16:0/22:6)	52610	923	0.00842328	2.9639e-05	0.0224367	0.00106842	Lipid	Phosphatidylcholine (PC)	HMDB07991
sphingomyelin (d18:2/24:1, d18:1/24:2)*	52437	923	0.00572308	4.06584e-05	0.0307784	0.00139902	Lipid	Sphingolipid Metabolism	NA
1-stearoyl-2-oleoyl-GPG (18:0/18:1)	52623	917	0.010653	4.90477e-05	0.0371291	0.00161431	Lipid	Phosphatidylglycerol (PG)	NA
margaroylcarnitine (C17)*	57512	914	-0.0118404	5.14709e-05	0.0389635	0.00162348	Lipid	Fatty Acid Metabolism(Acyl Carnitine)	HMDB06210
hippurate	15753	923	0.0249929	5.98556e-05	0.0453107	0.00181243	Xenobiotics	Benzoate Metabolism	HMDB00714
stearoylcarnitine (C18)	34409	923	-0.0092407	6.42659e-05	0.0486493	0.00183334	Lipid	Fatty Acid Metabolism(Acyl Carnitine)	HMDB00848
4-allylphenol sulfate	37181	918	0.0293258	6.53899e-05	0.0495001	0.00183334	Xenobiotics	Food Component/Plant	NA
inosine	1123	890	-0.0148696	8.69973e-05	0.0658569	0.00233492	Nucleotide	Purine Metabolism, (Hypo)Xanthine/Inosine containing	HMDB00195
methyl glucopyranoside (alpha + beta)	46144	840	0.0266278	8.94489e-05	0.0677128	0.00233492	Xenobiotics	Food Component/Plant	NA
1-linoleoyl-2-linolenoyl-GPC (18:2/18:3)*	53176	885	0.0170231	9.52761e-05	0.072124	0.00240413	Lipid	Phosphatidylcholine (PC)	HMDB08141
gamma-tocopherol/beta-tocopherol	52473	923	-0.0161379	0.000119122	0.0901756	0.00289773	Cofactors and Vitamins	Tocopherol Metabolism	NA
oxalate (ethanedioate)	20694	923	0.0112867	0.000122493	0.0927275	0.00289773	Cofactors and Vitamins	Ascorbate and Aldarate Metabolism	HMDB02329
tartronate (hydroxymalonate)	20693	921	0.0146473	0.000142065	0.107543	0.00325888	Xenobiotics	Bacterial/Fungal	HMDB35227
alliin	41494	654	0.0394958	0.000160307	0.121353	0.00356919	Xenobiotics	Food Component/Plant	HMDB33592
ergothioneine	37459	922	0.0153497	0.000168021	0.127192	0.00363405	Xenobiotics	Food Component/Plant	HMDB03045
glycerate	1572	923	0.00851013	0.000190717	0.144373	0.00401036	Carbohydrate	Glycolysis, Gluconeogenesis, and Pyruvate Metabolism	HMDB00139
dimethyl sulfoxide (DMSO)	48404	861	0.0126384	0.000230101	0.174186	0.00470774	Xenobiotics	Chemical	HMDB02151
adipoylcarnitine (C6-DC)	52988	905	-0.0158715	0.000259262	0.196262	0.00516478	Lipid	Fatty Acid Metabolism(Acyl Carnitine)	HMDB61677
S-methylcysteine	39592	923	0.0126316	0.000276652	0.209426	0.00536989	Amino Acid	Methionine, Cysteine, SAM and Taurine Metabolism	HMDB02108
palmitoyl dihydrosphingomyelin (d18:0/16:0)*	52434	923	0.00567473	0.000292152	0.221159	0.00552897	Lipid	Sphingolipid Metabolism	NA
ribulonate/xylulonate*	61858	918	0.01095	0.000308726	0.233706	0.00570014	Carbohydrate	Pentose Metabolism	NA
sphinganine	17769	684	-0.0123367	0.000334507	0.253221	0.00602908	Lipid	Sphingolipid Metabolism	HMDB00269
docosapentaenoate (n3 DPA; 22:5n3)	32504	923	0.0145471	0.00037035	0.280355	0.00651988	Lipid	Polyunsaturated Fatty Acid (n3 and n6)	HMDB06528
argininate*	57461	923	0.0122439	0.000409303	0.309842	0.00704186	Amino Acid	Urea cycle; Arginine and Proline Metabolism	HMDB03148
5,6-dihydrouridine	61833	923	-0.00578815	0.00047701	0.361097	0.00802437	Nucleotide	Pyrimidine Metabolism, Uracil containing	NA
guaiacol sulfate	46111	923	0.0174899	0.000568355	0.430245	0.00935315	Xenobiotics	Benzoate Metabolism	HMDB60013
trans-4-hydroxyproline	32306	923	-0.00915985	0.000601408	0.455266	0.00968651	Amino Acid	Urea cycle; Arginine and Proline Metabolism	HMDB00725
hypoxanthine	3127	923	-0.0129767	0.000646105	0.489101	0.0101896	Nucleotide	Purine Metabolism, (Hypo)Xanthine/Inosine containing	HMDB00157
1-lignoceroyl-GPC (24:0)	49617	922	0.00868149	0.000711719	0.538771	0.0107815	Lipid	Lysophospholipid	HMDB10405
aconitate [cis or trans]	46173	923	-0.00487495	0.000712119	0.539074	0.0107815	Energy	TCA Cycle	NA
sphingomyelin (d18:1/24:1, d18:2/24:0)*	47153	923	0.00600677	0.000853113	0.645806	0.0126629	Lipid	Sphingolipid Metabolism	HMDB12107
sphingomyelin (d18:2/18:1)*	57474	923	-0.00733707	0.000873243	0.661045	0.0127124	Lipid	Sphingolipid Metabolism	NA
cysteine s-sulfate	22176	923	-0.0107731	0.000952738	0.721223	0.013608	Amino Acid	Methionine, Cysteine, SAM and Taurine Metabolism	HMDB00731
tauroursodeoxycholate	39378	282	-0.0404271	0.00112822	0.854062	0.0155611	Lipid	Secondary Bile Acid Metabolism	HMDB00874
quinolinate	1899	879	-0.0101061	0.0011306	0.85586	0.0155611	Cofactors and Vitamins	Nicotinate and Nicotinamide Metabolism	HMDB00232
S-methylmethionine	38127	541	0.030268	0.0013256	1	0.0179193	Amino Acid	Methionine, Cysteine, SAM and Taurine Metabolism	HMDB38670
4-hydroxycoumarin	37445	727	0.0252728	0.00140588	1	0.018671	Xenobiotics	Drug - Cardiovascular	NA
3-hydroxypyridine sulfate	48448	914	0.0278669	0.00146845	1	0.0189576	Xenobiotics	Chemical	NA
pseudouridine	33442	923	-0.00496302	0.00147754	1	0.0189576	Nucleotide	Pyrimidine Metabolism, Uracil containing	HMDB00767
7-methylguanine	35114	923	-0.00425235	0.00155438	1	0.0196111	Nucleotide	Purine Metabolism, Guanine containing	HMDB00897
C-glycosyltryptophan	48782	923	-0.00617931	0.00181744	1	0.0225541	Amino Acid	Tryptophan Metabolism	NA
N-delta-acetylornithine	43249	923	0.0118565	0.00186459	1	0.0227661	Amino Acid	Urea cycle; Arginine and Proline Metabolism	NA
linolenate [alpha or gamma; (18:3n3 or 6)]	34035	923	0.0123665	0.00191186	1	0.0229727	Lipid	Polyunsaturated Fatty Acid (n3 and n6)	HMDB03073
S-adenosylhomocysteine (SAH)	42382	673	-0.00968963	0.00208988	1	0.0246693	Amino Acid	Methionine, Cysteine, SAM and Taurine Metabolism	HMDB00939
xanthine	3147	923	-0.00842549	0.00211824	1	0.0246693	Nucleotide	Purine Metabolism, (Hypo)Xanthine/Inosine containing	HMDB00292
sphingomyelin (d17:1/16:0, d18:1/15:0, d16:1/17:0)*	52433	923	-0.0051317	0.002214	1	0.0252209	Lipid	Sphingolipid Metabolism	NA
1-(1-enyl-stearoyl)-2-oleoyl-GPE (P-18:0/18:1)	52614	920	-0.00911753	0.00223224	1	0.0252209	Lipid	Plasmalogen	HMDB11375
gulonate*	46957	920	-0.00719946	0.00258986	1	0.0288312	Cofactors and Vitamins	Ascorbate and Aldarate Metabolism	HMDB03290
laurylcarnitine (C12)	34534	923	-0.0113398	0.00268049	1	0.0294077	Lipid	Fatty Acid Metabolism(Acyl Carnitine)	HMDB02250
2-oxindole-3-acetate	40479	576	0.0210155	0.00272589	1	0.0294786	Xenobiotics	Food Component/Plant	HMDB35514
propionylglycine	31932	841	0.011965	0.0031929	1	0.0340426	Lipid	Fatty Acid Metabolism (also BCAA Metabolism)	HMDB00783
tryptophan betaine	37097	922	0.0226831	0.00331195	1	0.0348215	Amino Acid	Tryptophan Metabolism	HMDB61115
N4-acetylcytidine	35130	833	-0.0105985	0.00374318	1	0.0388162	Nucleotide	Pyrimidine Metabolism, Cytidine containing	HMDB05923
palmitoleoylcarnitine (C16:1)*	53223	923	-0.00880313	0.00383683	1	0.0392497	Lipid	Fatty Acid Metabolism(Acyl Carnitine)	NA
deoxycarnitine	36747	923	-0.00414827	0.00407723	1	0.0411528	Lipid	Carnitine Metabolism	HMDB01161
beta-citrylglutamate	54923	922	-0.00675168	0.00433772	1	0.0431536	Amino Acid	Glutamate Metabolism	NA
palmitoylcarnitine (C16)	44681	923	-0.00558756	0.00438946	1	0.0431536	Lipid	Fatty Acid Metabolism(Acyl Carnitine)	HMDB00222
adenosine 5'-monophosphate (AMP)	32342	765	-0.0181599	0.00457331	1	0.0443846	Nucleotide	Purine Metabolism, Adenine containing	HMDB00045
N2,N2-dimethylguanosine	35137	923	-0.0044482	0.00487663	1	0.0466551	Nucleotide	Purine Metabolism, Guanine containing	HMDB04824
N-acetylneuraminate	32377	923	-0.00581196	0.00493052	1	0.0466551	Carbohydrate	Aminosugar Metabolism	HMDB00230
creatine	27718	923	0.00827304	0.0051709	1	0.0483256	Amino Acid	Creatine Metabolism	HMDB00064
nisinate (24:6n3)	57810	519	0.0183773	0.00596498	1	0.0550341	Lipid	Polyunsaturated Fatty Acid (n3 and n6)	HMDB02007
alpha-tocopherol	1561	923	0.00532487	0.00603412	1	0.0550341	Cofactors and Vitamins	Tocopherol Metabolism	HMDB01893
tyramine O-sulfate	48408	777	-0.020086	0.0068215	1	0.0614747	Amino Acid	Tyrosine Metabolism	HMDB06409
hydroxyasparagine**	62060	923	-0.00385909	0.00761995	1	0.067095	Amino Acid	Alanine and Aspartate Metabolism	NA
1-arachidonoyl-GPE (20:4n6)*	35186	923	-0.00527696	0.00762242	1	0.067095	Lipid	Lysophospholipid	HMDB11517
1-palmitoyl-2-oleoyl-GPI (16:0/18:1)*	52669	902	-0.00829181	0.00799516	1	0.0694095	Lipid	Phosphatidylinositol (PI)	HMDB09783
N-acetylisoleucine	33967	874	-0.00545487	0.00806874	1	0.0694095	Amino Acid	Leucine, Isoleucine and Valine Metabolism	HMDB61684
octadecenedioate (C18:1-DC)*	61861	923	0.00964567	0.00868043	1	0.0733229	Lipid	Fatty Acid, Dicarboxylate	NA
1-linoleoylglycerol (18:2)	27447	914	0.00960039	0.00871739	1	0.0733229	Lipid	Monoacylglycerol	NA
sphingomyelin (d18:1/22:1, d18:2/22:0, d16:1/24:1)*	48493	923	0.00326276	0.0091411	1	0.0760419	Lipid	Sphingolipid Metabolism	HMDB12104
2-hydroxypalmitate	35675	923	0.00459456	0.0093863	1	0.0766737	Lipid	Fatty Acid, Monohydroxy	HMDB31057
threonate	27738	923	0.00915257	0.00946386	1	0.0766737	Cofactors and Vitamins	Ascorbate and Aldarate Metabolism	HMDB00943
N-acetylalanine	1585	923	-0.00301042	0.00952091	1	0.0766737	Amino Acid	Alanine and Aspartate Metabolism	HMDB00766
2-hydroxy-3-methylvalerate	36746	923	-0.00763425	0.00976851	1	0.0778396	Amino Acid	Leucine, Isoleucine and Valine Metabolism	HMDB00317
5-dodecenoylcarnitine (C12:1)	61769	923	-0.0085653	0.0100165	1	0.0786401	Lipid	Fatty Acid Metabolism(Acyl Carnitine)	NA
3-hydroxy-2-ethylpropionate	32397	923	-0.00582362	0.0101777	1	0.0786401	Amino Acid	Leucine, Isoleucine and Valine Metabolism	HMDB00396
5-(galactosylhydroxy)-L-lysine	43582	921	-0.0060037	0.0102496	1	0.0786401	Amino Acid	Lysine Metabolism	NA
linoleate (18:2n6)	1105	923	0.00761895	0.0102845	1	0.0786401	Lipid	Polyunsaturated Fatty Acid (n3 and n6)	HMDB00673
maltose	15586	517	-0.020636	0.0104944	1	0.0794428	Carbohydrate	Glycogen Metabolism	HMDB00163
N-acetylphenylalanine	33950	910	-0.00702314	0.01071	1	0.0802719	Amino Acid	Phenylalanine Metabolism	HMDB00512
1-palmitoyl-2-docosahexaenoyl-GPE (16:0/22:6)*	52465	923	0.0101689	0.0109204	1	0.0805363	Lipid	Phosphatidylethanolamine (PE)	HMDB05324
gamma-glutamylisoleucine*	34457	914	-0.0062794	0.010958	1	0.0805363	Peptide	Gamma-glutamyl Amino Acid	HMDB11170
3b-hydroxy-5-cholenoic acid	43507	470	0.0130147	0.0111671	1	0.0812839	Lipid	Secondary Bile Acid Metabolism	HMDB00308
ribitol	15772	909	-0.00467283	0.011776	1	0.0848995	Carbohydrate	Pentose Metabolism	HMDB00508
pregnenolone sulfate	38170	856	0.01292	0.0119873	1	0.0851083	Lipid	Pregnenolone Steroids	HMDB00774
N-acetylaspartate (NAA)	22185	923	0.00307219	0.0120298	1	0.0851083	Amino Acid	Alanine and Aspartate Metabolism	HMDB00812
N-acetylthreonine	33939	919	-0.00387362	0.0122309	1	0.0854761	Amino Acid	Glycine, Serine and Threonine Metabolism	NA
12,13-DiHOME	38395	696	0.0101762	0.0123077	1	0.0854761	Lipid	Fatty Acid, Dihydroxy	HMDB04705
1-palmitoyl-2-dihomo-linolenoyl-GPC (16:0/20:3n3 or 6)*	52454	923	-0.0029379	0.0129088	1	0.0883421	Lipid	Phosphatidylcholine (PC)	NA
1-palmitoyl-2-oleoyl-GPE (16:0/18:1)	19263	917	-0.00945659	0.0129537	1	0.0883421	Lipid	Phosphatidylethanolamine (PE)	HMDB05320
aspartate	443	923	-0.00516434	0.0132255	1	0.0893903	Amino Acid	Alanine and Aspartate Metabolism	HMDB00191
1-oleoyl-2-docosahexaenoyl-GPE (18:1/22:6)*	53209	731	0.0127604	0.013462	1	0.0901836	Lipid	Phosphatidylethanolamine (PE)	NA
proline	1898	923	-0.00445052	0.0136862	1	0.0908811	Amino Acid	Urea cycle; Arginine and Proline Metabolism	HMDB00162
isoursodeoxycholate	57577	915	-0.0215976	0.014584	1	0.094473	Lipid	Secondary Bile Acid Metabolism	HMDB00686
1-oleoyl-2-docosahexaenoyl-GPC (18:1/22:6)*	52697	923	0.00501438	0.0146935	1	0.094473	Lipid	Phosphatidylcholine (PC)	HMDB08123
retinol (Vitamin A)	1806	923	0.0041542	0.0147704	1	0.094473	Cofactors and Vitamins	Vitamin A Metabolism	HMDB00305
N-formylmethionine	2829	923	-0.00363713	0.0149565	1	0.094473	Amino Acid	Methionine, Cysteine, SAM and Taurine Metabolism	HMDB01015
pyroglutamine*	46225	923	-0.00867928	0.0149654	1	0.094473	Amino Acid	Glutamate Metabolism	NA
3-methyl catechol sulfate (1)	46165	898	0.0185537	0.0149759	1	0.094473	Xenobiotics	Benzoate Metabolism	NA
1-palmitoyl-2-palmitoleoyl-GPC (16:0/16:1)*	52470	923	-0.00755712	0.015361	1	0.0951338	Lipid	Phosphatidylcholine (PC)	HMDB07969
2,3-dihydroxyisovalerate	38276	917	0.0219424	0.0154054	1	0.0951338	Xenobiotics	Food Component/Plant	HMDB12141
heneicosapentaenoate (21:5n3)	57658	508	0.0273687	0.0154577	1	0.0951338	Lipid	Polyunsaturated Fatty Acid (n3 and n6)	NA
N-stearoyl-sphingadienine (d18:2/18:0)*	57417	793	-0.00952347	0.0166525	1	0.101661	Lipid	Ceramides	NA
hexanoylcarnitine (C6)	32328	923	-0.00855762	0.0171625	1	0.103936	Lipid	Fatty Acid Metabolism(Acyl Carnitine)	HMDB00705
lignoceroyl sphingomyelin (d18:1/24:0)	57330	923	0.00431906	0.0173915	1	0.104487	Lipid	Sphingolipid Metabolism	NA
3-(3-hydroxyphenyl)propionate sulfate	45415	646	0.0190632	0.0177465	1	0.104964	Xenobiotics	Benzoate Metabolism	NA
dihomo-linoleate (20:2n6)	17805	923	0.00820865	0.0181158	1	0.104964	Lipid	Polyunsaturated Fatty Acid (n3 and n6)	HMDB05060
gamma-glutamylphenylalanine	33422	923	-0.00472897	0.0181292	1	0.104964	Peptide	Gamma-glutamyl Amino Acid	HMDB00594
2'-O-methyluridine	57655	869	-0.00585747	0.0181616	1	0.104964	Nucleotide	Pyrimidine Metabolism, Uracil containing	NA
vanillactate	54910	800	-0.00842302	0.0181642	1	0.104964	Amino Acid	Tyrosine Metabolism	HMDB00913
maleate	20676	886	-0.00773874	0.0188961	1	0.107808	Lipid	Fatty Acid, Dicarboxylate	HMDB00176
pipecolate	1444	922	0.00996232	0.0189411	1	0.107808	Amino Acid	Lysine Metabolism	HMDB00070
caprate (10:0)	1642	923	-0.00763611	0.0196782	1	0.110753	Lipid	Medium Chain Fatty Acid	HMDB00511
2-methylbutyrylcarnitine (C5)	45095	893	-0.00624029	0.0197906	1	0.110753	Amino Acid	Leucine, Isoleucine and Valine Metabolism	HMDB00378
2-hydroxylaurate	52916	833	-0.00647639	0.0198975	1	0.110753	Lipid	Fatty Acid, Monohydroxy	NA
N-stearoyl-sphingosine (d18:1/18:0)*	54979	923	-0.00588829	0.0201947	1	0.111587	Lipid	Ceramides	HMDB04950
5alpha-androstan-3alpha,17beta-diol 17-glucuronide	47132	283	-0.0190979	0.0210229	1	0.115158	Lipid	Androgenic Steroids	NA
arachidoylcarnitine (C20)*	57513	906	-0.00618319	0.0211453	1	0.115158	Lipid	Fatty Acid Metabolism(Acyl Carnitine)	HMDB06460
N-oleoyltaurine	39732	721	0.00917947	0.0224063	1	0.121154	Lipid	Endocannabinoid	NA
myristoleoylcarnitine (C14:1)*	48182	923	-0.00898892	0.0233307	1	0.125258	Lipid	Fatty Acid Metabolism(Acyl Carnitine)	NA
chiro-inositol	37112	347	-0.0274878	0.023683	1	0.126254	Lipid	Inositol Metabolism	HMDB34220
sphingomyelin (d18:2/24:2)*	57479	923	0.0048788	0.0246985	1	0.130747	Lipid	Sphingolipid Metabolism	NA
isoleucine	1125	923	-0.00244398	0.0255624	1	0.133739	Amino Acid	Leucine, Isoleucine and Valine Metabolism	HMDB00172
octanoylcarnitine (C8)	33936	923	-0.00932318	0.025617	1	0.133739	Lipid	Fatty Acid Metabolism(Acyl Carnitine)	HMDB00791
pregn steroid monosulfate C21H34O5S*	32619	923	0.0101468	0.0261182	1	0.135421	Lipid	Pregnenolone Steroids	NA
decanoylcarnitine (C10)	33941	923	-0.00934868	0.0278116	1	0.14322	Lipid	Fatty Acid Metabolism(Acyl Carnitine)	HMDB00651
N-acetylalliin	45404	694	0.0199131	0.029468	1	0.150658	Xenobiotics	Food Component/Plant	NA
4-hydroxychlorothalonil	48441	923	0.00810903	0.029654	1	0.150658	Xenobiotics	Chemical	NA
1-(1-enyl-palmitoyl)-2-oleoyl-GPC (P-16:0/18:1)*	52478	923	0.00421872	0.0301791	1	0.151677	Lipid	Plasmalogen	NA
S-allylcysteine	43239	791	0.0219291	0.0302553	1	0.151677	Xenobiotics	Food Component/Plant	HMDB34323
sphingomyelin (d18:2/23:0, d18:1/23:1, d17:1/24:1)*	52435	923	0.00434624	0.0306642	1	0.152716	Lipid	Sphingolipid Metabolism	NA
5-hydroxyindole sulfate	52914	419	0.0128279	0.0311734	1	0.153549	Amino Acid	Tryptophan Metabolism	NA
palmitoleoyl-linoleoyl-glycerol (16:1/18:2) [1]*	54967	877	-0.0118066	0.0312372	1	0.153549	Lipid	Diacylglycerol	HMDB07132
4-cholesten-3-one	38125	791	-0.00615484	0.0315007	1	0.153846	Lipid	Sterol	HMDB00921
3-methylhistidine	15677	916	0.0201182	0.0319769	1	0.15517	Amino Acid	Histidine Metabolism	HMDB00479
dihomo-linolenoyl-choline	53262	851	-0.0115901	0.0323452	1	0.155957	Lipid	Fatty Acid Metabolism (Acyl Choline)	NA
lactosyl-N-nervonoyl-sphingosine (d18:1/24:1)*	57370	923	0.00497499	0.0337904	1	0.161125	Lipid	Ceramides	NA
pantothenate	1508	923	0.0080058	0.0340095	1	0.161125	Cofactors and Vitamins	Pantothenate and CoA Metabolism	HMDB00210
cytidine	514	889	-0.00921455	0.0340554	1	0.161125	Nucleotide	Pyrimidine Metabolism, Cytidine containing	HMDB00089
malate	1303	923	-0.00318766	0.0345657	1	0.161139	Energy	TCA Cycle	HMDB00156
N-oleoylserine	57664	822	0.00628774	0.0350566	1	0.161139	Lipid	Endocannabinoid	NA
gentisate	18280	884	0.0114883	0.0351513	1	0.161139	Amino Acid	Tyrosine Metabolism	HMDB00152
2-hydroxyphenylacetate	1432	828	-0.0074076	0.0352232	1	0.161139	Amino Acid	Tyrosine Metabolism	HMDB00669
N-acetylcitrulline	48434	721	-0.0125672	0.0353067	1	0.161139	Amino Acid	Urea cycle; Arginine and Proline Metabolism	HMDB00856
2-aminophenol sulfate	43266	909	0.0163108	0.0353357	1	0.161139	Xenobiotics	Chemical	HMDB61116
N-acetylglucosamine/N-acetylgalactosamine	46539	639	-0.00671175	0.0373848	1	0.169463	Carbohydrate	Aminosugar Metabolism	HMDB00215
trans-urocanate	607	915	0.00737958	0.0379551	1	0.170855	Amino Acid	Histidine Metabolism	HMDB00301
creatinine	513	923	-0.00216536	0.0381434	1	0.170855	Amino Acid	Creatine Metabolism	HMDB00562
alpha-ketobutyrate	4968	919	0.00644894	0.0389608	1	0.172166	Amino Acid	Methionine, Cysteine, SAM and Taurine Metabolism	HMDB00005
oleoyl-oleoyl-glycerol (18:1/18:1) [2]*	54946	919	-0.00868417	0.0389691	1	0.172166	Lipid	Diacylglycerol	HMDB07218
N-acetyl-3-methylhistidine*	43256	686	0.0157189	0.0391184	1	0.172166	Amino Acid	Histidine Metabolism	NA
N-acetyl-1-methylhistidine*	43255	908	-0.0106405	0.0393813	1	0.172322	Amino Acid	Histidine Metabolism	NA
glutarylcarnitine (C5-DC)	44664	919	-0.00586924	0.0403523	1	0.174555	Amino Acid	Lysine Metabolism	HMDB13130
vanillylmandelate (VMA)	1567	922	-0.00505174	0.0403528	1	0.174555	Amino Acid	Tyrosine Metabolism	HMDB00291
1-stearoyl-2-docosahexaenoyl-GPE (18:0/22:6)*	52466	918	0.00923854	0.0412217	1	0.176932	Lipid	Phosphatidylethanolamine (PE)	HMDB05334
methylsuccinoylcarnitine	53031	642	0.0107205	0.0413699	1	0.176932	Amino Acid	Leucine, Isoleucine and Valine Metabolism	NA
oleoyl-oleoyl-glycerol (18:1/18:1) [1]*	54945	860	-0.00864798	0.0419221	1	0.178287	Lipid	Diacylglycerol	HMDB07218
N1-methyladenosine	15650	923	-0.00257054	0.0445186	1	0.186643	Nucleotide	Purine Metabolism, Adenine containing	HMDB03331
N-trimethyl 5-aminovalerate	57687	923	-0.00591637	0.0445316	1	0.186643	Amino Acid	Lysine Metabolism	NA
kynurenine	15140	923	-0.00359876	0.0447829	1	0.186643	Amino Acid	Tryptophan Metabolism	HMDB00684
glutarate (C5-DC)	396	870	-0.0103574	0.0448732	1	0.186643	Lipid	Fatty Acid, Dicarboxylate	HMDB00661
homocitrulline	22138	874	-0.00937742	0.0459241	1	0.18997	Amino Acid	Urea cycle; Arginine and Proline Metabolism	HMDB00679
orotidine	35172	923	-0.00735121	0.0477631	1	0.195554	Nucleotide	Pyrimidine Metabolism, Orotate containing	HMDB00788
hypotaurine	590	845	-0.00688592	0.0477907	1	0.195554	Amino Acid	Methionine, Cysteine, SAM and Taurine Metabolism	HMDB00965
taurolithocholate 3-sulfate	36850	907	0.0137206	0.0490894	1	0.198743	Lipid	Secondary Bile Acid Metabolism	HMDB02580
1-(1-enyl-palmitoyl)-2-palmitoyl-GPC (P-16:0/16:0)*	52716	923	0.00330935	0.0495303	1	0.198743	Lipid	Plasmalogen	HMDB11206
4-hydroxyphenylacetate	541	280	-0.0177128	0.0495308	1	0.198743	Amino Acid	Phenylalanine Metabolism	HMDB00020
3-hydroxyhippurate	39600	920	0.0170173	0.0496202	1	0.198743	Xenobiotics	Benzoate Metabolism	HMDB06116
sphingomyelin (d18:1/20:0, d16:1/22:0)*	48490	923	0.00261931	0.0502313	1	0.200132	Lipid	Sphingolipid Metabolism	HMDB12102
N-methyltaurine	42989	516	0.0196488	0.0507946	1	0.201317	Amino Acid	Methionine, Cysteine, SAM and Taurine Metabolism	NA
heptanoate (7:0)	1644	727	0.00694262	0.052427	1	0.204812	Lipid	Medium Chain Fatty Acid	HMDB00666
2-oxoarginine*	55072	885	0.00701605	0.0524653	1	0.204812	Amino Acid	Urea cycle; Arginine and Proline Metabolism	HMDB04225
linoleoyl-arachidonoyl-glycerol (18:2/20:4) [2]*	54956	849	0.00888107	0.0527291	1	0.204812	Lipid	Diacylglycerol	HMDB07257
stachydrine	34384	923	0.0209516	0.0527587	1	0.204812	Xenobiotics	Food Component/Plant	HMDB04827
glycosyl ceramide (d18:2/24:1, d18:1/24:2)*	57453	923	0.00491234	0.0538374	1	0.207761	Lipid	Ceramides	NA
isovalerate (i5:0)	44656	907	0.00635205	0.0540671	1	0.207761	Amino Acid	Leucine, Isoleucine and Valine Metabolism	HMDB00718
pregnanolone/allopregnanolone sulfate	48394	202	-0.0289216	0.0548335	1	0.209429	Lipid	Progestin Steroids	NA
10-undecenoate (11:1n1)	32497	923	-0.00608254	0.0550548	1	0.209429	Lipid	Medium Chain Fatty Acid	HMDB33724
glycolithocholate sulfate*	32620	923	0.0125025	0.0553951	1	0.209613	Lipid	Secondary Bile Acid Metabolism	HMDB02639
glycosyl ceramide (d18:1/23:1, d17:1/24:1)*	57448	596	0.00904117	0.0556569	1	0.209613	Lipid	Ceramides	NA
laurate (12:0)	1645	923	-0.00687601	0.0563711	1	0.211252	Lipid	Medium Chain Fatty Acid	HMDB00638
N-formylanthranilic acid	43549	800	-0.00625036	0.0566683	1	0.21132	Amino Acid	Tryptophan Metabolism	HMDB04089
3-hydroxyadipate*	62069	812	-0.00809217	0.0572353	1	0.212143	Lipid	Fatty Acid, Dicarboxylate	HMDB00345
cystine	56	923	-0.00404124	0.0574494	1	0.212143	Amino Acid	Methionine, Cysteine, SAM and Taurine Metabolism	HMDB00192
5alpha-androstan-3alpha,17beta-diol monosulfate (2)	37185	270	0.0208457	0.0580456	1	0.213304	Lipid	Androgenic Steroids	NA
5-acetylamino-6-amino-3-methyluracil	34424	899	0.0157824	0.058431	1	0.213683	Xenobiotics	Xanthine Metabolism	HMDB04400
3-methylxanthine	32445	884	-0.0126027	0.0589137	1	0.214412	Xenobiotics	Xanthine Metabolism	HMDB01886
glyco-alpha-muricholate**	62065	447	0.0146164	0.0595968	1	0.21586	Lipid	Primary Bile Acid Metabolism	NA
sphingosine 1-phosphate	34445	923	-0.00368591	0.0607869	1	0.216666	Lipid	Sphingolipid Metabolism	HMDB00277
docosahexaenoylcholine	53263	864	0.00916272	0.0607875	1	0.216666	Lipid	Fatty Acid Metabolism (Acyl Choline)	NA
arabinose	575	844	-0.00594439	0.0609365	1	0.216666	Carbohydrate	Pentose Metabolism	HMDB00646
hexanoylglutamine	54907	902	-0.0105599	0.0609641	1	0.216666	Lipid	Fatty Acid Metabolism (Acyl Glutamine)	NA
5-dodecenoate (12:1n7)	33968	922	-0.00763772	0.0615509	1	0.217729	Lipid	Medium Chain Fatty Acid	HMDB00529
citrulline	2132	923	-0.00283339	0.0632785	1	0.222031	Amino Acid	Urea cycle; Arginine and Proline Metabolism	HMDB00904
1-palmitoleoyl-GPC (16:1)*	33230	923	-0.00426468	0.0633536	1	0.222031	Lipid	Lysophospholipid	HMDB10383
isobutyrylcarnitine (C4)	33441	923	0.00687799	0.0637458	1	0.22207	Amino Acid	Leucine, Isoleucine and Valine Metabolism	HMDB00736
orotate	1505	923	-0.00524762	0.0639514	1	0.22207	Nucleotide	Pyrimidine Metabolism, Orotate containing	HMDB00226
mannitol/sorbitol	46142	923	0.0117785	0.0647027	1	0.223653	Carbohydrate	Fructose, Mannose and Galactose Metabolism	HMDB00247
2-hydroxystearate	17945	923	0.00310304	0.0652193	1	0.224414	Lipid	Fatty Acid, Monohydroxy	NA
caprylate (8:0)	32492	834	-0.0067709	0.0663152	1	0.227152	Lipid	Medium Chain Fatty Acid	HMDB00482
15-methylpalmitate (i17:0)	38768	888	-0.00579751	0.0670741	1	0.228717	Lipid	Fatty Acid, Branched	NA
9-hydroxystearate	47120	891	-0.00645412	0.0688582	1	0.23294	Lipid	Fatty Acid, Monohydroxy	HMDB61661
cysteine sulfinic acid	37443	606	0.00577527	0.0689282	1	0.23294	Amino Acid	Methionine, Cysteine, SAM and Taurine Metabolism	HMDB00996
docosadienoate (22:2n6)	32415	923	0.00579447	0.0699276	1	0.235268	Lipid	Polyunsaturated Fatty Acid (n3 and n6)	HMDB61714
arabonate/xylonate	48255	923	0.00424731	0.0704708	1	0.23537	Carbohydrate	Pentose Metabolism	NA
1-methyl-4-imidazoleacetate	32350	923	-0.0042608	0.0705798	1	0.23537	Amino Acid	Histidine Metabolism	HMDB02820
N-acetyltaurine	48187	898	-0.00633925	0.0732112	1	0.243018	Amino Acid	Methionine, Cysteine, SAM and Taurine Metabolism	NA
pyridoxate	31555	923	0.00997453	0.0735153	1	0.243018	Cofactors and Vitamins	Vitamin B6 Metabolism	HMDB00017
tryptophan	54	923	0.00216839	0.0754835	1	0.248439	Amino Acid	Tryptophan Metabolism	HMDB00929
1-linoleoyl-GPI (18:2)*	36594	923	0.00551867	0.0772258	1	0.253073	Lipid	Lysophospholipid	NA
perfluorooctanoate (PFOA)*	62071	923	0.00618328	0.078295	1	0.255471	Xenobiotics	Chemical	HMDB59587
1-oleoyl-GPE (18:1)	35628	923	-0.00535774	0.0791638	1	0.256831	Lipid	Lysophospholipid	HMDB11506
5-bromotryptophan	53242	923	0.00456405	0.0793904	1	0.256831	Amino Acid	Tryptophan Metabolism	NA
N1-methylinosine	48351	919	-0.00424462	0.0797562	1	0.256917	Nucleotide	Purine Metabolism, (Hypo)Xanthine/Inosine containing	HMDB02721
tricosanoyl sphingomyelin (d18:1/23:0)*	52436	923	0.00298494	0.0819524	1	0.262873	Lipid	Sphingolipid Metabolism	HMDB12105
2-aminobutyrate	42374	923	0.0036028	0.0835549	1	0.266882	Amino Acid	Glutathione Metabolism	HMDB00650
cortisone	1769	923	0.00438003	0.0844372	1	0.268567	Lipid	Corticosteroids	HMDB02802
1-(1-enyl-stearoyl)-2-linoleoyl-GPE (P-18:0/18:2)*	52748	923	-0.00425745	0.084937	1	0.269026	Lipid	Plasmalogen	HMDB11376
erucate (22:1n9)	1552	921	0.00615785	0.0858978	1	0.270936	Lipid	Long Chain Fatty Acid	HMDB02068
5alpha-androstan-3beta,17alpha-diol disulfate	37187	698	0.0144707	0.0868131	1	0.272687	Lipid	Androgenic Steroids	NA
O-sulfo-L-tyrosine	45413	923	-0.00390359	0.0875735	1	0.273939	Xenobiotics	Chemical	NA
7-methylxanthine	34390	849	-0.0117154	0.0882485	1	0.274914	Xenobiotics	Xanthine Metabolism	HMDB01991
3-hydroxyoleate*	61843	910	0.00591397	0.0923263	1	0.286439	Lipid	Fatty Acid, Monohydroxy	NA
1-stearoyl-2-arachidonoyl-GPI (18:0/20:4)	52449	923	-0.00383813	0.0935433	1	0.287237	Lipid	Phosphatidylinositol (PI)	HMDB09815
N1-Methyl-2-pyridone-5-carboxamide	40469	923	0.00583172	0.0938252	1	0.287237	Cofactors and Vitamins	Nicotinate and Nicotinamide Metabolism	HMDB04193
5-oxoproline	1494	923	-0.00214604	0.0940149	1	0.287237	Amino Acid	Glutathione Metabolism	HMDB00267
methionine sulfoxide	18374	923	0.00268171	0.0941015	1	0.287237	Amino Acid	Methionine, Cysteine, SAM and Taurine Metabolism	HMDB02005
lysine	1301	923	0.00169351	0.0948842	1	0.287767	Amino Acid	Lysine Metabolism	HMDB00182
5alpha-androstan-3beta,17beta-diol monosulfate (2)	37192	672	-0.0101474	0.0950355	1	0.287767	Lipid	Androgenic Steroids	NA
arginine	1638	923	0.00242903	0.0957837	1	0.28819	Amino Acid	Urea cycle; Arginine and Proline Metabolism	HMDB00517
3-hydroxybutyrylcarnitine (2)	52984	922	-0.00661471	0.0959364	1	0.28819	Lipid	Fatty Acid Metabolism(Acyl Carnitine)	HMDB13127
cis-4-decenoylcarnitine (C10:1)	38178	923	-0.00579113	0.0976763	1	0.292257	Lipid	Fatty Acid Metabolism(Acyl Carnitine)	NA
taurocholenate sulfate	32807	923	-0.00784694	0.0990888	1	0.295316	Lipid	Secondary Bile Acid Metabolism	NA
L-urobilin	40173	403	-0.0190739	0.100647	1	0.298134	Cofactors and Vitamins	Hemoglobin and Porphyrin Metabolism	HMDB04159
1-oleoyl-GPG (18:1)*	45968	562	0.00738604	0.100822	1	0.298134	Lipid	Lysophospholipid	NA
N-acetylleucine	1587	871	-0.00390014	0.105239	1	0.309069	Amino Acid	Leucine, Isoleucine and Valine Metabolism	HMDB11756
benzoate	15778	874	0.00531369	0.105336	1	0.309069	Xenobiotics	Benzoate Metabolism	HMDB01870
1-palmitoyl-2-arachidonoyl-GPI (16:0/20:4)*	52467	910	-0.00484569	0.108073	1	0.315874	Lipid	Phosphatidylinositol (PI)	HMDB09789
gamma-glutamylvaline	43829	921	-0.0043366	0.108822	1	0.316839	Peptide	Gamma-glutamyl Amino Acid	HMDB11172
1-linoleoyl-GPE (18:2)*	36600	923	-0.00421558	0.110277	1	0.316893	Lipid	Lysophospholipid	HMDB11507
lanthionine	42002	644	0.00797116	0.110466	1	0.316893	Xenobiotics	Chemical	NA
ximenoylcarnitine (C26:1)*	57517	923	0.00380437	0.110486	1	0.316893	Lipid	Fatty Acid Metabolism(Acyl Carnitine)	NA
4-methylcatechol sulfate	46146	923	0.0098637	0.110585	1	0.316893	Xenobiotics	Benzoate Metabolism	NA
eicosenoate (20:1)	33587	923	0.00581135	0.110934	1	0.316893	Lipid	Long Chain Fatty Acid	HMDB02231
N-palmitoyl-sphingosine (d18:1/16:0)	44877	923	-0.00280253	0.113597	1	0.319734	Lipid	Ceramides	HMDB04949
1-(1-enyl-stearoyl)-2-arachidonoyl-GPE (P-18:0/20:4)*	52475	923	-0.00422319	0.113816	1	0.319734	Lipid	Plasmalogen	HMDB05779
2-piperidinone	43400	923	-0.0107033	0.11385	1	0.319734	Xenobiotics	Food Component/Plant	HMDB11749
dodecanedioate (C12-DC)	32388	912	-0.00693227	0.114227	1	0.319734	Lipid	Fatty Acid, Dicarboxylate	HMDB00623
2-hydroxybutyrate/2-hydroxyisobutyrate	52281	923	0.0043582	0.114648	1	0.319734	Amino Acid	Glutathione Metabolism	NA
beta-guanidinopropanoate	35101	562	0.011017	0.114677	1	0.319734	Xenobiotics	Food Component/Plant	HMDB13222
solanidine	39788	322	-0.0209206	0.115112	1	0.319734	Xenobiotics	Food Component/Plant	HMDB03236
N-acetylserine	37076	923	-0.00238606	0.115307	1	0.319734	Amino Acid	Glycine, Serine and Threonine Metabolism	HMDB02931
hexadecadienoate (16:2n6)	57652	923	0.00599983	0.117984	1	0.325963	Lipid	Polyunsaturated Fatty Acid (n3 and n6)	HMDB00477
lactate	527	923	-0.00322756	0.119507	1	0.328906	Carbohydrate	Glycolysis, Gluconeogenesis, and Pyruvate Metabolism	HMDB00190
heme	41754	818	-0.00931754	0.120702	1	0.328906	Cofactors and Vitamins	Hemoglobin and Porphyrin Metabolism	HMDB03178
dimethyl sulfone	43424	874	0.0115419	0.120856	1	0.328906	Xenobiotics	Chemical	HMDB04983
2-hydroxyphytanate*	61702	923	-0.00568928	0.121055	1	0.328906	Lipid	Fatty Acid, Monohydroxy	NA
1-cerotoyl-GPC (26:0)*	61505	691	0.0050508	0.121222	1	0.328906	Lipid	Lysophospholipid	HMDB29205
arachidonate (20:4n6)	1110	923	0.00398797	0.123381	1	0.333568	Lipid	Polyunsaturated Fatty Acid (n3 and n6)	HMDB01043
1,2,3-benzenetriol sulfate (2)	48762	568	0.0206181	0.125059	1	0.336904	Xenobiotics	Chemical	NA
cysteinylglycine disulfide*	62103	923	-0.00211845	0.12622	1	0.338296	Amino Acid	Glutathione Metabolism	HMDB00709
N6-succinyladenosine	48130	666	-0.00530003	0.12647	1	0.338296	Nucleotide	Purine Metabolism, Adenine containing	HMDB00912
etiocholanolone glucuronide	47112	866	0.00807106	0.127099	1	0.33878	Lipid	Androgenic Steroids	HMDB04484
cortisol	1712	923	0.00411404	0.128333	1	0.34087	Lipid	Corticosteroids	HMDB00063
myristoleate (14:1n5)	32418	923	-0.00619876	0.130536	1	0.34551	Lipid	Long Chain Fatty Acid	HMDB02000
4-vinylguaiacol sulfate	48442	239	-0.0258552	0.131416	1	0.346627	Xenobiotics	Food Component/Plant	NA
glycoursodeoxycholate	39379	918	-0.0127411	0.134202	1	0.351472	Lipid	Secondary Bile Acid Metabolism	HMDB00708
phenylacetylglutamate	52925	797	-0.00784082	0.134859	1	0.351472	Peptide	Acetylated Peptides	HMDB59772
1-palmitoyl-2-arachidonoyl-GPE (16:0/20:4)*	52464	923	-0.00468938	0.135087	1	0.351472	Lipid	Phosphatidylethanolamine (PE)	HMDB05323
palmitoyl sphingomyelin (d18:1/16:0)	37506	923	0.00143722	0.135629	1	0.351472	Lipid	Sphingolipid Metabolism	NA
gamma-glutamyltryptophan	33947	687	-0.00400504	0.135705	1	0.351472	Peptide	Gamma-glutamyl Amino Acid	HMDB29160
p-cresol-glucuronide*	48841	902	-0.0126431	0.136039	1	0.351472	Amino Acid	Tyrosine Metabolism	HMDB11686
sphingomyelin (d18:1/20:1, d18:2/20:0)*	48491	923	0.00224526	0.137274	1	0.353456	Lipid	Sphingolipid Metabolism	NA
N-acetylglucosaminylasparagine	48149	851	-0.00407327	0.142266	1	0.365069	Carbohydrate	Aminosugar Metabolism	HMDB00489
methionine	1302	923	-0.00182004	0.142837	1	0.365297	Amino Acid	Methionine, Cysteine, SAM and Taurine Metabolism	HMDB00696
N-acetyl-2-aminooctanoate*	62059	923	-0.00592069	0.144021	1	0.367083	Lipid	Fatty Acid, Amino	HMDB59745
1-stearoyl-2-arachidonoyl-GPE (18:0/20:4)	52447	923	-0.00388804	0.145864	1	0.370534	Lipid	Phosphatidylethanolamine (PE)	HMDB09003
3-ureidopropionate	3155	837	0.00344746	0.147934	1	0.373617	Nucleotide	Pyrimidine Metabolism, Uracil containing	HMDB00026
betaine	3141	923	0.00221602	0.148065	1	0.373617	Amino Acid	Glycine, Serine and Threonine Metabolism	HMDB00043
uridine	606	923	0.00232507	0.149304	1	0.375493	Nucleotide	Pyrimidine Metabolism, Uracil containing	HMDB00296
indolelactate	18349	923	0.00341908	0.152371	1	0.381936	Amino Acid	Tryptophan Metabolism	HMDB00671
1-stearoyl-GPI (18:0)	19324	923	0.0053169	0.153758	1	0.382989	Lipid	Lysophospholipid	HMDB61696
chenodeoxycholate	1563	553	0.0084962	0.154021	1	0.382989	Lipid	Primary Bile Acid Metabolism	HMDB00518
4-hydroxyphenylacetylglutamine	55017	821	-0.00739253	0.154907	1	0.382989	Peptide	Acetylated Peptides	NA
carboxyethyl-GABA	40007	910	0.00327835	0.155089	1	0.382989	Amino Acid	Glutamate Metabolism	HMDB02201
serotonin	2342	439	-0.0179576	0.15532	1	0.382989	Amino Acid	Tryptophan Metabolism	HMDB00259
1-stearoyl-2-linoleoyl-GPC (18:0/18:2)*	52452	923	0.00155446	0.156097	1	0.383655	Lipid	Phosphatidylcholine (PC)	HMDB08039
17-methylstearate (i19:0)	38296	923	-0.00383762	0.158216	1	0.387603	Lipid	Fatty Acid, Branched	HMDB37397
N6,N6,N6-trimethyllysine	1498	923	-0.00396574	0.158841	1	0.387879	Amino Acid	Lysine Metabolism	HMDB01325
1,2-dipalmitoyl-GPC (16:0/16:0)	19130	923	0.00179086	0.162362	1	0.395202	Lipid	Phosphatidylcholine (PC)	HMDB00564
oleoylcarnitine (C18:1)	35160	923	-0.00288665	0.163686	1	0.396793	Lipid	Fatty Acid Metabolism(Acyl Carnitine)	HMDB05065
sulfate*	46960	923	0.00173208	0.164795	1	0.396793	Xenobiotics	Chemical	HMDB01448
1-palmitoyl-2-oleoyl-GPC (16:0/18:1)	52461	923	-0.00186848	0.165083	1	0.396793	Lipid	Phosphatidylcholine (PC)	HMDB07972
hexadecasphingosine (d16:1)*	57428	326	-0.00681681	0.165248	1	0.396793	Lipid	Sphingolipid Metabolism	NA
gamma-glutamylcitrulline*	62104	923	-0.00388669	0.166118	1	0.396793	Peptide	Gamma-glutamyl Amino Acid	NA
betonicine	38100	645	0.0181676	0.16616	1	0.396793	Xenobiotics	Food Component/Plant	HMDB29412
dihomo-linolenate (20:3n3 or n6)	35718	923	0.00370383	0.167456	1	0.39863	Lipid	Polyunsaturated Fatty Acid (n3 and n6)	HMDB02925
N-acetyltryptophan	33959	909	-0.00415462	0.170585	1	0.404135	Amino Acid	Tryptophan Metabolism	HMDB13713
cysteinylglycine	35637	905	-0.00549482	0.170837	1	0.404135	Amino Acid	Glutathione Metabolism	HMDB00078
1-(1-enyl-palmitoyl)-2-palmitoleoyl-GPC (P-16:0/16:1)*	52713	923	0.0029952	0.17288	1	0.407696	Lipid	Plasmalogen	HMDB11207
pregnanediol-3-glucuronide	40708	874	0.00764978	0.17582	1	0.411512	Lipid	Progestin Steroids	HMDB10318
6-hydroxyindole sulfate	48698	922	-0.0055678	0.176029	1	0.411512	Xenobiotics	Chemical	NA
maltotriose	44688	269	-0.0201972	0.176457	1	0.411512	Carbohydrate	Glycogen Metabolism	HMDB01262
3-methyl-2-oxovalerate	15676	923	-0.00220088	0.176673	1	0.411512	Amino Acid	Leucine, Isoleucine and Valine Metabolism	HMDB03736
cysteine-glutathione disulfide	35159	913	-0.00592814	0.177743	1	0.412735	Amino Acid	Glutathione Metabolism	HMDB00656
1-palmitoleoyl-2-linolenoyl-GPC (16:1/18:3)*	53180	689	0.00538367	0.181451	1	0.420056	Lipid	Phosphatidylcholine (PC)	HMDB08008
glucuronide of C10H18O2 (1)*	61881	237	-0.0180573	0.187116	1	0.43185	Partially Characterized Molecules	Partially Characterized Molecules	NA
isovalerylcarnitine (C5)	34407	923	0.00392146	0.187853	1	0.432233	Amino Acid	Leucine, Isoleucine and Valine Metabolism	HMDB00688
allantoin	1107	923	0.00166627	0.188748	1	0.432976	Nucleotide	Purine Metabolism, (Hypo)Xanthine/Inosine containing	HMDB00462
N-palmitoylglycine	42092	921	0.00319807	0.189609	1	0.433638	Lipid	Fatty Acid Metabolism(Acyl Glycine)	HMDB13034
3-acetylphenol sulfate	48693	348	-0.0116782	0.192767	1	0.439531	Xenobiotics	Chemical	NA
pyruvate	48990	923	-0.00209434	0.194731	1	0.440872	Carbohydrate	Glycolysis, Gluconeogenesis, and Pyruvate Metabolism	HMDB00243
palmitoyl-linoleoyl-glycerol (16:0/18:2) [2]*	52634	899	-0.00597728	0.195052	1	0.440872	Lipid	Diacylglycerol	HMDB07103
dehydroisoandrosterone sulfate (DHEA-S)	32425	922	0.0060997	0.195737	1	0.440872	Lipid	Androgenic Steroids	HMDB01032
N-acetylglycine	27710	923	0.00485214	0.196176	1	0.440872	Amino Acid	Glycine, Serine and Threonine Metabolism	HMDB00532
1-linoleoyl-GPG (18:2)*	54885	910	0.00375472	0.196266	1	0.440872	Lipid	Lysophospholipid	NA
3-hydroxyhexanoate	53230	923	-0.00381613	0.197854	1	0.443123	Lipid	Fatty Acid, Monohydroxy	NA
theobromine	18392	913	-0.00937125	0.200389	1	0.447475	Xenobiotics	Xanthine Metabolism	HMDB02825
carnitine	15500	923	0.0016656	0.203136	1	0.452276	Lipid	Carnitine Metabolism	HMDB00062
adenine	554	920	-0.00309858	0.203894	1	0.452634	Nucleotide	Purine Metabolism, Adenine containing	HMDB00034
2-hydroxyglutarate	37253	909	0.0034309	0.205687	1	0.454322	Lipid	Fatty Acid, Dicarboxylate	HMDB00606
lactosyl-N-palmitoyl-sphingosine (d18:1/16:0)	53010	923	0.00225065	0.20697	1	0.454322	Lipid	Ceramides	NA
3-hydroxysebacate	31943	843	-0.00691894	0.207139	1	0.454322	Lipid	Fatty Acid, Monohydroxy	HMDB00350
N-palmitoyl-heptadecasphingosine (d17:1/16:0)*	57430	862	-0.0036022	0.207313	1	0.454322	Lipid	Sphingolipid Metabolism	NA
myristoyl-linoleoyl-glycerol (14:0/18:2) [1]*	57407	658	-0.00849416	0.207656	1	0.454322	Lipid	Diacylglycerol	NA
1-palmitoyl-2-linoleoyl-GPC (16:0/18:2)	42446	923	0.00129034	0.208319	1	0.454459	Lipid	Phosphatidylcholine (PC)	HMDB07973
oleate/vaccenate (18:1)	52285	923	0.00353795	0.211903	1	0.459935	Lipid	Long Chain Fatty Acid	NA
dopamine 3-O-sulfate	48407	922	0.00460144	0.212044	1	0.459935	Amino Acid	Tyrosine Metabolism	HMDB06275
N-acetylvaline	1591	921	-0.00196578	0.213161	1	0.461036	Amino Acid	Leucine, Isoleucine and Valine Metabolism	HMDB11757
eicosenoylcarnitine (C20:1)*	57519	922	-0.0031837	0.216315	1	0.466526	Lipid	Fatty Acid Metabolism(Acyl Carnitine)	NA
1-palmitoyl-2-linoleoyl-GPI (16:0/18:2)	52450	902	-0.00374755	0.219668	1	0.471646	Lipid	Phosphatidylinositol (PI)	HMDB09784
5alpha-androstan-3alpha,17beta-diol monosulfate (1)	37186	766	-0.00737699	0.219935	1	0.471646	Lipid	Androgenic Steroids	NA
ferulic acid 4-sulfate	47114	187	-0.0179694	0.223465	1	0.477761	Xenobiotics	Food Component/Plant	HMDB29200
3-hydroxystachydrine*	62062	732	0.0152652	0.224049	1	0.477761	Xenobiotics	Food Component/Plant	NA
2,3-dihydroxy-2-methylbutyrate	57547	724	0.00540947	0.228861	1	0.486651	Amino Acid	Leucine, Isoleucine and Valine Metabolism	HMDB29576
anthranilate	57746	606	-0.00407899	0.229707	1	0.487081	Amino Acid	Tryptophan Metabolism	HMDB01123
methylsuccinate	15745	912	0.00298013	0.23128	1	0.489047	Amino Acid	Leucine, Isoleucine and Valine Metabolism	HMDB01844
S-1-pyrroline-5-carboxylate	42370	922	0.00264106	0.233317	1	0.490856	Amino Acid	Glutamate Metabolism	HMDB01301
galactonate	27719	761	-0.0085275	0.23363	1	0.490856	Carbohydrate	Fructose, Mannose and Galactose Metabolism	HMDB00565
erythronate*	42420	923	-0.00162412	0.234716	1	0.490856	Carbohydrate	Aminosugar Metabolism	HMDB00613
1-(1-enyl-palmitoyl)-2-linoleoyl-GPC (P-16:0/18:2)*	52682	923	0.00244225	0.234729	1	0.490856	Lipid	Plasmalogen	HMDB11211
myo-inositol	1124	923	0.00345055	0.236231	1	0.492371	Lipid	Inositol Metabolism	HMDB00211
propionylcarnitine (C3)	32452	923	0.00255053	0.236754	1	0.492371	Lipid	Fatty Acid Metabolism (also BCAA Metabolism)	HMDB00824
thioproline	53231	923	0.00233686	0.238335	1	0.4943	Xenobiotics	Chemical	NA
uracil	605	817	0.00277321	0.243259	1	0.503134	Nucleotide	Pyrimidine Metabolism, Uracil containing	HMDB00300
palmitoyl-linoleoyl-glycerol (16:0/18:2) [1]*	52633	859	-0.0061241	0.244735	1	0.504807	Lipid	Diacylglycerol	HMDB07103
saccharin	21151	516	-0.013779	0.24551	1	0.505029	Xenobiotics	Food Component/Plant	HMDB29723
sphingomyelin (d18:1/25:0, d19:0/24:1, d20:1/23:0, d19:1/24:0)*	57478	923	-0.00323114	0.248677	1	0.510159	Lipid	Sphingolipid Metabolism	NA
4-vinylphenol sulfate	36098	922	0.00898027	0.249711	1	0.510896	Xenobiotics	Benzoate Metabolism	HMDB04072
o-cresol sulfate	36845	576	-0.0100321	0.250504	1	0.511136	Xenobiotics	Benzoate Metabolism	NA
glutamate, gamma-methyl ester	33487	844	-0.00282938	0.254576	1	0.518049	Amino Acid	Glutamate Metabolism	HMDB61715
nicotinamide	594	923	-0.00386731	0.256672	1	0.520913	Cofactors and Vitamins	Nicotinate and Nicotinamide Metabolism	HMDB01406
1-stearoyl-2-oleoyl-GPE (18:0/18:1)	42448	923	-0.0041757	0.258237	1	0.522688	Lipid	Phosphatidylethanolamine (PE)	HMDB08993
alpha-hydroxyisovalerate	33937	923	-0.00363063	0.259254	1	0.523348	Amino Acid	Leucine, Isoleucine and Valine Metabolism	HMDB00407
N-acetylputrescine	37496	923	-0.00218379	0.260462	1	0.524054	Amino Acid	Polyamine Metabolism	HMDB02064
nervonoylcarnitine (C24:1)*	57531	906	0.00285035	0.261525	1	0.524054	Lipid	Fatty Acid Metabolism(Acyl Carnitine)	NA
androstenediol (3beta,17beta) monosulfate (1)	37211	916	0.0062235	0.261681	1	0.524054	Lipid	Androgenic Steroids	HMDB03818
oleoyl ethanolamide	38102	915	0.00335743	0.262435	1	0.524177	Lipid	Endocannabinoid	HMDB02088
1-ribosyl-imidazoleacetate*	61868	923	-0.00297148	0.264337	1	0.526058	Amino Acid	Histidine Metabolism	HMDB02331
5alpha-pregnan-3beta,20alpha-diol monosulfate (2)	37200	884	0.00684641	0.264766	1	0.526058	Lipid	Progestin Steroids	NA
cholate	22842	828	0.0111138	0.267281	1	0.529664	Lipid	Primary Bile Acid Metabolism	HMDB00619
gamma-glutamylthreonine	33364	923	-0.00242589	0.269257	1	0.532186	Peptide	Gamma-glutamyl Amino Acid	HMDB29159
1,5-anhydroglucitol (1,5-AG)	20675	923	-0.00341889	0.27174	1	0.534459	Carbohydrate	Glycolysis, Gluconeogenesis, and Pyruvate Metabolism	HMDB02712
5-hydroxylysine	15685	846	-0.00293219	0.271977	1	0.534459	Amino Acid	Lysine Metabolism	HMDB00450
succinylcarnitine (C4-DC)	37058	923	-0.0022365	0.272525	1	0.534459	Energy	TCA Cycle	HMDB61717
hydroquinone sulfate	35322	689	-0.00724027	0.274222	1	0.535054	Xenobiotics	Drug - Topical Agents	HMDB02434
3-indoxyl sulfate	27672	923	-0.00437621	0.274241	1	0.535054	Amino Acid	Tryptophan Metabolism	HMDB00682
caproate (6:0)	32489	919	-0.00332059	0.275006	1	0.535165	Lipid	Medium Chain Fatty Acid	HMDB00535
4-ethylphenylsulfate	36099	922	0.010317	0.277992	1	0.539233	Xenobiotics	Benzoate Metabolism	NA
adrenate (22:4n6)	32980	907	0.0041122	0.27853	1	0.539233	Lipid	Polyunsaturated Fatty Acid (n3 and n6)	HMDB02226
iminodiacetate (IDA)	21025	923	0.00189537	0.279233	1	0.539233	Xenobiotics	Chemical	HMDB11753
dimethylglycine	5086	923	-0.00232778	0.28216	1	0.543499	Amino Acid	Glycine, Serine and Threonine Metabolism	HMDB00092
phosphoethanolamine	1600	920	-0.00341783	0.285767	1	0.54905	Lipid	Phospholipid Metabolism	HMDB00224
linolenoylcarnitine (C18:3)*	57511	921	0.0027039	0.289552	1	0.554914	Lipid	Fatty Acid Metabolism(Acyl Carnitine)	NA
gamma-glutamyltyrosine	2734	921	-0.0024493	0.291955	1	0.558105	Peptide	Gamma-glutamyl Amino Acid	HMDB11741
gamma-glutamylglutamate	36738	911	0.00274666	0.300471	1	0.572939	Peptide	Gamma-glutamyl Amino Acid	HMDB11737
N-acetyl-beta-alanine	37432	910	0.00201324	0.304867	1	0.579861	Nucleotide	Pyrimidine Metabolism, Uracil containing	NA
glycohyocholate	42574	672	-0.00692029	0.306964	1	0.581493	Lipid	Secondary Bile Acid Metabolism	NA
gamma-glutamylleucine	18369	923	-0.00183371	0.307262	1	0.581493	Peptide	Gamma-glutamyl Amino Acid	HMDB11171
pro-hydroxy-pro	35127	922	-0.00277941	0.313582	1	0.589977	Amino Acid	Urea cycle; Arginine and Proline Metabolism	HMDB06695
N-methylhydroxyproline**	62068	706	-0.00858854	0.314369	1	0.589977	Amino Acid	Urea cycle; Arginine and Proline Metabolism	NA
HWESASXX*	57711	357	-0.00756828	0.314699	1	0.589977	Peptide	Polypeptide	NA
4-hydroxyhippurate	35527	923	-0.00522898	0.314862	1	0.589977	Xenobiotics	Benzoate Metabolism	HMDB13678
imidazole propionate	40730	906	-0.00447895	0.318451	1	0.593504	Amino Acid	Histidine Metabolism	HMDB02271
sphingomyelin (d18:1/14:0, d16:1/16:0)*	42463	923	-0.00140555	0.318577	1	0.593504	Lipid	Sphingolipid Metabolism	HMDB12097
N-acetyl-S-allyl-L-cysteine	47136	215	0.0118241	0.319096	1	0.593504	Xenobiotics	Food Component/Plant	NA
N-acetylkynurenine (2)	48757	589	-0.00565852	0.320558	1	0.59476	Amino Acid	Tryptophan Metabolism	NA
androsterone glucuronide	61846	883	-0.00501318	0.322293	1	0.596519	Lipid	Androgenic Steroids	HMDB02829
3-methoxytyrosine	12017	923	-0.00251881	0.324646	1	0.599408	Amino Acid	Tyrosine Metabolism	HMDB01434
1-stearoyl-2-oleoyl-GPC (18:0/18:1)	52438	923	-0.00198961	0.327834	1	0.603588	Lipid	Phosphatidylcholine (PC)	HMDB08038
1-(1-enyl-stearoyl)-GPE (P-18:0)*	39271	923	-0.0038921	0.329431	1	0.603588	Lipid	Lysoplasmalogen	NA
3,7-dimethylurate	34399	750	-0.00591252	0.330706	1	0.603588	Xenobiotics	Xanthine Metabolism	HMDB01982
biliverdin	2137	923	-0.00313768	0.33075	1	0.603588	Cofactors and Vitamins	Hemoglobin and Porphyrin Metabolism	HMDB01008
N-acetylcarnosine	43488	923	-0.00292379	0.330897	1	0.603588	Amino Acid	Histidine Metabolism	HMDB12881
histidine	59	923	0.000965079	0.332401	1	0.604874	Amino Acid	Histidine Metabolism	HMDB00177
1-palmitoyl-2-stearoyl-GPC (16:0/18:0)	52616	921	0.00199418	0.334041	1	0.605412	Lipid	Phosphatidylcholine (PC)	HMDB07970
N-acetylglutamate	15720	872	-0.00365076	0.335382	1	0.605412	Amino Acid	Glutamate Metabolism	HMDB01138
3,4-methyleneheptanoate	53026	659	0.00575223	0.337038	1	0.605412	Xenobiotics	Food Component/Plant	NA
adrenoylcarnitine (C22:4)*	57528	556	-0.00332198	0.337223	1	0.605412	Lipid	Fatty Acid Metabolism(Acyl Carnitine)	NA
theophylline	18394	868	0.00750939	0.33773	1	0.605412	Xenobiotics	Xanthine Metabolism	HMDB01889
behenoyl dihydrosphingomyelin (d18:0/22:0)*	57331	923	0.00284301	0.338646	1	0.605412	Lipid	Sphingolipid Metabolism	HMDB12091
glycodeoxycholate sulfate	52975	869	0.00693429	0.339119	1	0.605412	Lipid	Secondary Bile Acid Metabolism	NA
dihydroorotate	601	923	-0.00302677	0.339205	1	0.605412	Nucleotide	Pyrimidine Metabolism, Orotate containing	HMDB03349
1-arachidonoyl-GPI (20:4)*	34214	923	0.00251907	0.339894	1	0.605412	Lipid	Lysophospholipid	HMDB61690
nonadecanoate (19:0)	1356	923	0.00191	0.341657	1	0.607123	Lipid	Long Chain Fatty Acid	HMDB00772
glycine conjugate of C10H14O2 (1)*	62146	886	-0.00451771	0.343343	1	0.608691	Partially Characterized Molecules	Partially Characterized Molecules	NA
N-carbamoylalanine	52340	588	-0.00506713	0.345784	1	0.610894	Amino Acid	Alanine and Aspartate Metabolism	NA
octadecenedioylcarnitine (C18:1-DC)*	61865	922	0.00388208	0.346856	1	0.610894	Lipid	Fatty Acid Metabolism(Acyl Carnitine)	NA
glycochenodeoxycholate sulfate	52974	835	-0.00639911	0.347007	1	0.610894	Lipid	Primary Bile Acid Metabolism	NA
phytanate	598	923	-0.00340829	0.347861	1	0.610976	Xenobiotics	Food Component/Plant	HMDB00801
16-hydroxypalmitate	39609	923	-0.00263707	0.349513	1	0.612457	Lipid	Fatty Acid, Monohydroxy	HMDB06294
serine	1648	923	0.00126341	0.350542	1	0.612531	Amino Acid	Glycine, Serine and Threonine Metabolism	HMDB00187
phenol sulfate	32553	923	0.00509374	0.351174	1	0.612531	Amino Acid	Tyrosine Metabolism	HMDB60015
5alpha-pregnan-3beta,20alpha-diol disulfate	37198	915	-0.00635413	0.352395	1	0.612948	Lipid	Progestin Steroids	NA
glucuronide of C14H22O4 (2)*	61970	423	0.00707916	0.353032	1	0.612948	Partially Characterized Molecules	Partially Characterized Molecules	NA
cysteine	1868	923	0.00210104	0.365118	1	0.632481	Amino Acid	Methionine, Cysteine, SAM and Taurine Metabolism	HMDB00574
adenosine	555	923	-0.00340158	0.367168	1	0.634581	Nucleotide	Purine Metabolism, Adenine containing	HMDB00050
2'-deoxyuridine	52602	914	0.00211995	0.369452	1	0.63617	Nucleotide	Pyrimidine Metabolism, Uracil containing	HMDB00012
2-aminoadipate	6146	760	0.00303724	0.369769	1	0.63617	Amino Acid	Lysine Metabolism	HMDB00510
glycodeoxycholate	18477	781	0.00730424	0.37082	1	0.636532	Lipid	Secondary Bile Acid Metabolism	HMDB00631
hexadecenedioate (C16:1-DC)*	61862	902	-0.00336237	0.372217	1	0.637485	Lipid	Fatty Acid, Dicarboxylate	NA
1-methylhistidine	30460	920	-0.00281071	0.374044	1	0.638965	Amino Acid	Histidine Metabolism	HMDB00001
N2-acetyllysine	36751	503	-0.00585155	0.374769	1	0.638965	Amino Acid	Lysine Metabolism	HMDB00446
sphingomyelin (d18:1/22:2, d18:2/22:1, d16:1/24:2)*	57477	923	0.0018087	0.376879	1	0.641117	Lipid	Sphingolipid Metabolism	NA
stearoyl ethanolamide	38625	923	-0.00228188	0.379826	1	0.644586	Lipid	Endocannabinoid	HMDB13078
homoarginine	22137	923	0.00245142	0.380621	1	0.644586	Amino Acid	Urea cycle; Arginine and Proline Metabolism	HMDB00670
1-palmitoyl-2-linoleoyl-GPE (16:0/18:2)	42449	923	-0.00306488	0.381755	1	0.645064	Lipid	Phosphatidylethanolamine (PE)	HMDB05322
phosphate	42109	923	0.00159671	0.385489	1	0.649231	Energy	Oxidative Phosphorylation	HMDB01429
3beta-hydroxy-5-cholestenoate	54805	923	0.00219943	0.385936	1	0.649231	Lipid	Sterol	NA
tartarate	15336	771	-0.00516603	0.386941	1	0.649478	Xenobiotics	Food Component/Plant	HMDB00956
gamma-glutamylglycine	33949	923	0.00182778	0.389364	1	0.650748	Peptide	Gamma-glutamyl Amino Acid	HMDB11667
1,7-dimethylurate	34400	888	0.00680104	0.389417	1	0.650748	Xenobiotics	Xanthine Metabolism	HMDB11103
pyrraline	48428	821	0.00421612	0.390616	1	0.651314	Xenobiotics	Food Component/Plant	HMDB33143
5alpha-androstan-3beta,17beta-diol disulfate	37190	913	-0.00619267	0.393406	1	0.652191	Lipid	Androgenic Steroids	HMDB00493
arachidate (20:0)	1118	923	0.00133737	0.394755	1	0.652191	Lipid	Long Chain Fatty Acid	HMDB02212
1,3,7-trimethylurate	34404	712	-0.00702838	0.395441	1	0.652191	Xenobiotics	Xanthine Metabolism	HMDB02123
dimethylarginine (SDMA + ADMA)	36808	923	0.00139005	0.395821	1	0.652191	Amino Acid	Urea cycle; Arginine and Proline Metabolism	HMDB01539
N-acetylmethionine	1589	923	-0.00158547	0.396096	1	0.652191	Amino Acid	Methionine, Cysteine, SAM and Taurine Metabolism	HMDB11745
pentadecanoate (15:0)	1361	923	-0.00188369	0.396311	1	0.652191	Lipid	Long Chain Fatty Acid	HMDB00826
corticosterone	5983	491	0.00564194	0.397535	1	0.652786	Lipid	Corticosteroids	HMDB01547
sphingomyelin (d18:0/20:0, d16:0/22:0)*	57476	923	0.00273374	0.399081	1	0.653906	Lipid	Sphingolipid Metabolism	NA
5alpha-androstan-3alpha,17alpha-diol monosulfate	37183	364	0.00579279	0.40529	1	0.661415	Lipid	Androgenic Steroids	NA
3-methyl-2-oxobutyrate	44526	923	0.00118383	0.405965	1	0.661415	Amino Acid	Leucine, Isoleucine and Valine Metabolism	HMDB00019
bilirubin (E,Z or Z,E)*	47886	923	0.00229874	0.406322	1	0.661415	Cofactors and Vitamins	Hemoglobin and Porphyrin Metabolism	HMDB00488
salicylate	1515	922	0.0101715	0.407268	1	0.661415	Xenobiotics	Drug - Topical Agents	HMDB01895
androstenediol (3alpha, 17alpha) monosulfate (2)	37207	816	0.00356978	0.408801	1	0.661415	Lipid	Androgenic Steroids	NA
2-hydroxydecanoate	42489	923	0.00268224	0.409225	1	0.661415	Lipid	Fatty Acid, Monohydroxy	NA
1-palmitoleoylglycerol (16:1)*	52431	744	-0.0034755	0.40978	1	0.661415	Lipid	Monoacylglycerol	HMDB11565
dihydroferulic acid	40481	349	-0.00713997	0.411803	1	0.663266	Xenobiotics	Food Component/Plant	NA
2-palmitoyl-GPC (16:0)*	35253	923	0.00165004	0.414248	1	0.665787	Lipid	Lysophospholipid	HMDB61702
taurochenodeoxycholate	18494	859	-0.00688388	0.417709	1	0.669927	Lipid	Primary Bile Acid Metabolism	HMDB00951
alpha-CEHC sulfate	47666	560	-0.0072753	0.419432	1	0.671269	Cofactors and Vitamins	Tocopherol Metabolism	NA
epiandrosterone sulfate	33973	918	0.00490603	0.422893	1	0.67538	Lipid	Androgenic Steroids	NA
10-heptadecenoate (17:1n7)	33971	923	-0.00307306	0.423809	1	0.675418	Lipid	Long Chain Fatty Acid	HMDB60038
stearoyl sphingomyelin (d18:1/18:0)	19503	923	0.0012446	0.425593	1	0.676836	Lipid	Sphingolipid Metabolism	HMDB01348
1-linoleoyl-GPC (18:2)	34419	923	0.00151351	0.427333	1	0.677956	Lipid	Lysophospholipid	HMDB10386
linoleoylcarnitine (C18:2)*	46223	923	0.00173939	0.428089	1	0.677956	Lipid	Fatty Acid Metabolism(Acyl Carnitine)	HMDB06469
eicosanodioate (C20-DC)	39831	923	-0.0027791	0.430093	1	0.678428	Lipid	Fatty Acid, Dicarboxylate	NA
5-hydroxyhexanoate	31938	679	-0.00404006	0.431209	1	0.678428	Lipid	Fatty Acid, Monohydroxy	HMDB00525
1-methylguanidine	48114	390	-0.00404676	0.432292	1	0.678428	Amino Acid	Guanidino and Acetamido Metabolism	HMDB01522
tetradecanedioate (C14-DC)	35669	911	-0.00326645	0.432501	1	0.678428	Lipid	Fatty Acid, Dicarboxylate	HMDB00872
3-(4-hydroxyphenyl)lactate	32197	923	-0.00178811	0.432867	1	0.678428	Amino Acid	Tyrosine Metabolism	HMDB00755
1-oleoyl-GPC (18:1)	48258	923	-0.00134462	0.433905	1	0.678649	Lipid	Lysophospholipid	HMDB02815
guanidinoacetate	43802	923	0.00156428	0.439976	1	0.686725	Amino Acid	Creatine Metabolism	HMDB00128
alanine	1126	923	-0.00112236	0.442415	1	0.689111	Amino Acid	Alanine and Aspartate Metabolism	HMDB00161
13-HODE + 9-HODE	37752	909	0.00276902	0.444075	1	0.690276	Lipid	Fatty Acid, Monohydroxy	NA
glycosyl-N-stearoyl-sphingosine (d18:1/18:0)	52234	922	-0.00179624	0.451897	1	0.697938	Lipid	Ceramides	NA
phenylalanine	64	923	-0.000645146	0.452029	1	0.697938	Amino Acid	Phenylalanine Metabolism	HMDB00159
4-acetamidophenylglucuronide	15736	302	-0.0244818	0.452569	1	0.697938	Xenobiotics	Drug - Analgesics, Anesthetics	HMDB10316
1-stearoyl-2-linoleoyl-GPE (18:0/18:2)*	52446	923	-0.00239623	0.452692	1	0.697938	Lipid	Phosphatidylethanolamine (PE)	HMDB08994
1-(1-enyl-palmitoyl)-2-arachidonoyl-GPE (P-16:0/20:4)*	52673	923	0.00197433	0.455418	1	0.700714	Lipid	Plasmalogen	HMDB11352
4-acetaminophen sulfate	37475	398	-0.0217524	0.456766	1	0.701018	Xenobiotics	Drug - Analgesics, Anesthetics	HMDB59911
16a-hydroxy DHEA 3-sulfate	38168	919	0.00469962	0.457803	1	0.701018	Lipid	Androgenic Steroids	NA
3-hydroxybutyrylcarnitine (1)	43264	750	-0.00458797	0.458394	1	0.701018	Lipid	Fatty Acid Metabolism(Acyl Carnitine)	HMDB13127
prolylglycine	40703	845	-0.00265609	0.462742	1	0.704164	Peptide	Dipeptide	HMDB11178
2'-O-methylcytidine	57554	922	0.0011656	0.463266	1	0.704164	Nucleotide	Pyrimidine Metabolism, Cytidine containing	NA
formiminoglutamate	43493	879	-0.00222162	0.463849	1	0.704164	Amino Acid	Histidine Metabolism	HMDB00854
sphingomyelin (d18:2/16:0, d18:1/16:1)*	42459	923	-0.00089257	0.464171	1	0.704164	Lipid	Sphingolipid Metabolism	NA
1-linoleoyl-2-arachidonoyl-GPC (18:2/20:4n6)*	52710	921	0.00123754	0.471597	1	0.713998	Lipid	Phosphatidylcholine (PC)	HMDB08147
1-myristoyl-2-palmitoyl-GPC (14:0/16:0)	19258	923	-0.00272167	0.472664	1	0.714185	Lipid	Phosphatidylcholine (PC)	HMDB07869
thyroxine	2761	922	0.00116814	0.475834	1	0.717543	Amino Acid	Tyrosine Metabolism	HMDB01918
glucose	48152	923	0.000625971	0.478026	1	0.718107	Carbohydrate	Glycolysis, Gluconeogenesis, and Pyruvate Metabolism	HMDB00122
1-methylnicotinamide	27665	923	0.00273037	0.478105	1	0.718107	Cofactors and Vitamins	Nicotinate and Nicotinamide Metabolism	HMDB00699
N-methylpipecolate	47101	866	0.00392329	0.479843	1	0.719289	Xenobiotics	Bacterial/Fungal	NA
1-(1-enyl-palmitoyl)-GPE (P-16:0)*	39270	923	0.00183194	0.481132	1	0.719797	Lipid	Lysoplasmalogen	NA
cerotoylcarnitine (C26)*	57516	923	0.00178118	0.48367	1	0.722167	Lipid	Fatty Acid Metabolism(Acyl Carnitine)	HMDB06347
octadecanedioate (C18-DC)	36754	877	0.00263643	0.485645	1	0.723687	Lipid	Fatty Acid, Dicarboxylate	HMDB00782
phenylacetate	57745	726	0.00361537	0.486824	1	0.72402	Amino Acid	Phenylalanine Metabolism	HMDB00209
11-ketoetiocholanolone glucuronide	47135	669	0.00364557	0.490091	1	0.727449	Lipid	Androgenic Steroids	NA
alpha-ketoglutarate	528	923	-0.0018305	0.491948	1	0.728377	Energy	TCA Cycle	HMDB00208
ornithine	1493	923	-0.00099433	0.492641	1	0.728377	Amino Acid	Urea cycle; Arginine and Proline Metabolism	HMDB03374
sphingomyelin (d17:1/14:0, d16:1/15:0)*	62152	923	-0.00183963	0.500625	1	0.736718	Lipid	Sphingolipid Metabolism	NA
phenyllactate (PLA)	22130	923	-0.00152624	0.500663	1	0.736718	Amino Acid	Phenylalanine Metabolism	HMDB00779
cholesterol	63	923	0.00117122	0.501202	1	0.736718	Lipid	Sterol	HMDB00067
4-acetamidobutanoate	1558	916	0.00191039	0.507165	1	0.742851	Amino Acid	Polyamine Metabolism	HMDB03681
gamma-CEHC	44876	923	-0.00300575	0.507336	1	0.742851	Cofactors and Vitamins	Tocopherol Metabolism	HMDB01931
homostachydrine*	33009	886	-0.00307353	0.515982	1	0.753233	Xenobiotics	Food Component/Plant	HMDB33433
alpha-CEHC glucuronide*	39346	431	-0.00793863	0.516551	1	0.753233	Cofactors and Vitamins	Tocopherol Metabolism	NA
indole-3-carboxylic acid	38116	788	0.00200561	0.517413	1	0.753233	Amino Acid	Tryptophan Metabolism	HMDB03320
glycine conjugate of C10H12O2*	62145	655	0.00317577	0.519173	1	0.753973	Partially Characterized Molecules	Partially Characterized Molecules	NA
linoleoyl-linoleoyl-glycerol (18:2/18:2) [1]*	54968	920	0.00332639	0.519913	1	0.753973	Lipid	Diacylglycerol	HMDB07248
acetoacetate	33963	699	0.00392971	0.525497	1	0.760615	Lipid	Ketone Bodies	HMDB00060
urea	1670	923	0.00124432	0.529386	1	0.761466	Amino Acid	Urea cycle; Arginine and Proline Metabolism	HMDB00294
sphingomyelin (d18:2/23:1)*	57482	923	0.00136683	0.530397	1	0.761466	Lipid	Sphingolipid Metabolism	NA
piperine	33935	918	0.00541507	0.531772	1	0.761466	Xenobiotics	Food Component/Plant	HMDB29377
N2,N5-diacetylornithine	43591	874	0.00268627	0.532903	1	0.761466	Amino Acid	Urea cycle; Arginine and Proline Metabolism	NA
indolin-2-one	43374	807	-0.00278213	0.533084	1	0.761466	Xenobiotics	Food Component/Plant	NA
sphingomyelin (d18:1/21:0, d17:1/22:0, d16:1/23:0)*	52495	923	0.00138181	0.53319	1	0.761466	Lipid	Sphingolipid Metabolism	NA
stearate (18:0)	1358	923	0.00106118	0.534073	1	0.761466	Lipid	Long Chain Fatty Acid	HMDB00827
gamma-glutamylhistidine	18245	923	-0.000991892	0.534132	1	0.761466	Peptide	Gamma-glutamyl Amino Acid	NA
phenylacetylglutamine	35126	923	-0.00267309	0.535375	1	0.761803	Peptide	Acetylated Peptides	HMDB06344
acetylcarnitine (C2)	32198	923	-0.00132181	0.541369	1	0.76863	Lipid	Fatty Acid Metabolism(Acyl Carnitine)	HMDB00201
sphingomyelin (d18:1/17:0, d17:1/18:0, d19:1/16:0)	52615	923	-0.00102483	0.543129	1	0.76863	Lipid	Sphingolipid Metabolism	NA
taurodeoxycholate	12261	821	-0.0054871	0.54322	1	0.76863	Lipid	Secondary Bile Acid Metabolism	HMDB00896
oleoyl-arachidonoyl-glycerol (18:1/20:4) [1]*	54960	886	-0.00256654	0.546376	1	0.770901	Lipid	Diacylglycerol	HMDB07228
2-hydroxyhippurate (salicylurate)	18281	921	0.00808305	0.546861	1	0.770901	Xenobiotics	Benzoate Metabolism	HMDB00840
ceramide (d18:2/24:1, d18:1/24:2)*	57443	923	0.0013439	0.549661	1	0.771154	Lipid	Ceramides	NA
paraxanthine	18254	794	-0.00402235	0.549909	1	0.771154	Xenobiotics	Xanthine Metabolism	HMDB01860
1-(1-enyl-palmitoyl)-2-oleoyl-GPE (P-16:0/18:1)*	52477	919	-0.00145744	0.550097	1	0.771154	Lipid	Plasmalogen	HMDB11342
eicosapentaenoylcholine	53258	472	0.00413337	0.551831	1	0.772155	Lipid	Fatty Acid Metabolism (Acyl Choline)	NA
indoleacetylglutamine	42087	744	-0.00349557	0.553313	1	0.772801	Amino Acid	Tryptophan Metabolism	HMDB13240
1-arachidonylglycerol (20:4)	34397	729	0.00257495	0.554763	1	0.773398	Lipid	Monoacylglycerol	HMDB11549
linoleoylcholine*	57463	923	0.00290791	0.565198	1	0.786497	Lipid	Fatty Acid Metabolism (Acyl Choline)	NA
alpha-ketoglutaramate**	62101	923	0.000990586	0.567844	1	0.786629	Amino Acid	Glutamate Metabolism	NA
1-stearoyl-GPE (18:0)	42398	923	-0.00129064	0.569526	1	0.786629	Lipid	Lysophospholipid	HMDB11130
glycosyl-N-palmitoyl-sphingosine (d18:1/16:0)	53013	923	-0.00119598	0.569626	1	0.786629	Lipid	Ceramides	NA
5-methylthioadenosine (MTA)	1419	923	-0.00110534	0.57003	1	0.786629	Amino Acid	Polyamine Metabolism	HMDB01173
2-aminooctanoate	43343	923	-0.0023065	0.570488	1	0.786629	Lipid	Fatty Acid, Amino	HMDB00991
dihomo-linoleoylcarnitine (C20:2)*	57520	912	0.00146596	0.579623	1	0.797772	Lipid	Fatty Acid Metabolism(Acyl Carnitine)	NA
6-oxopiperidine-2-carboxylate	43231	805	-0.00194268	0.581637	1	0.798755	Amino Acid	Lysine Metabolism	HMDB61705
malonylcarnitine	37059	722	0.00182041	0.58464	1	0.798755	Lipid	Fatty Acid Synthesis	HMDB02095
3-hydroxybutyroylglycine**	62064	914	-0.00259447	0.584747	1	0.798755	Lipid	Fatty Acid Metabolism(Acyl Glycine)	NA
glucuronide of C10H18O2 (7)*	61887	543	-0.00526953	0.585386	1	0.798755	Partially Characterized Molecules	Partially Characterized Molecules	NA
hydantoin-5-propionic acid	40473	918	-0.00216341	0.586599	1	0.798755	Amino Acid	Histidine Metabolism	HMDB01212
p-cresol sulfate	36103	923	-0.00331696	0.586921	1	0.798755	Xenobiotics	Benzoate Metabolism	HMDB11635
N-(2-furoyl)glycine	31536	688	-0.00341651	0.587723	1	0.798755	Xenobiotics	Food Component/Plant	HMDB00439
N-palmitoyl-sphinganine (d18:0/16:0)	52604	910	-0.00154421	0.588989	1	0.79904	Lipid	Sphingolipid Metabolism	HMDB11760
2-hydroxyacetaminophen sulfate*	33173	322	-0.0143678	0.590215	1	0.799272	Xenobiotics	Drug - Analgesics, Anesthetics	NA
3-methoxycatechol sulfate (1)	48763	750	0.00527932	0.594936	1	0.804226	Xenobiotics	Benzoate Metabolism	NA
7-methylurate	39598	753	-0.00285793	0.599579	1	0.809057	Xenobiotics	Xanthine Metabolism	HMDB11107
threonine	1284	923	-0.000795641	0.604479	1	0.812945	Amino Acid	Glycine, Serine and Threonine Metabolism	HMDB00167
4-hydroxy-2-oxoglutaric acid	40062	899	-0.00259052	0.604608	1	0.812945	Lipid	Fatty Acid, Dicarboxylate	HMDB02070
ribonate	27731	923	-0.00121535	0.608041	1	0.815915	Carbohydrate	Pentose Metabolism	HMDB00867
behenoylcarnitine (C22)*	57514	845	-0.00187915	0.609662	1	0.815915	Lipid	Fatty Acid Metabolism(Acyl Carnitine)	NA
1-linoleoyl-GPA (18:2)*	52690	669	0.00213245	0.61005	1	0.815915	Lipid	Lysophospholipid	HMDB07856
5-methyluridine (ribothymidine)	35136	923	-0.000920488	0.611891	1	0.816934	Nucleotide	Pyrimidine Metabolism, Uracil containing	HMDB00884
palmitate (16:0)	1336	923	0.00109302	0.614045	1	0.817635	Lipid	Long Chain Fatty Acid	HMDB00220
caffeic acid sulfate	53254	483	-0.00529406	0.614577	1	0.817635	Xenobiotics	Xanthine Metabolism	HMDB41708
taurocholate	18497	708	-0.00537282	0.616676	1	0.818989	Lipid	Primary Bile Acid Metabolism	HMDB00036
fructose	48195	923	0.00151295	0.618737	1	0.820287	Carbohydrate	Fructose, Mannose and Galactose Metabolism	HMDB00660
taurine	2125	923	0.000898593	0.620182	1	0.820765	Amino Acid	Methionine, Cysteine, SAM and Taurine Metabolism	HMDB00251
EDTA	22163	923	0.000418353	0.623464	1	0.823669	Xenobiotics	Chemical	HMDB15109
1-oleoyl-GPI (18:1)*	36602	902	0.00217072	0.627689	1	0.827328	Lipid	Lysophospholipid	NA
1-palmitoyl-GPI (16:0)	35305	879	0.002326	0.62842	1	0.827328	Lipid	Lysophospholipid	HMDB61695
(N(1) + N(8))-acetylspermidine	57814	844	0.00136527	0.630094	1	0.828092	Amino Acid	Polyamine Metabolism	NA
sphingomyelin (d18:1/18:1, d18:2/18:0)	37529	923	-0.00072459	0.632956	1	0.830412	Lipid	Sphingolipid Metabolism	HMDB12101
xylose	15581	815	-0.0013426	0.638254	1	0.835914	Carbohydrate	Pentose Metabolism	HMDB00098
choline	15506	923	-0.000629278	0.641716	1	0.837697	Lipid	Phospholipid Metabolism	HMDB00097
asparagine	512	923	0.000470002	0.64208	1	0.837697	Amino Acid	Alanine and Aspartate Metabolism	HMDB00168
myristate (14:0)	1365	923	-0.00155053	0.642935	1	0.837697	Lipid	Long Chain Fatty Acid	HMDB00806
1H-indole-7-acetic acid	57783	863	-0.00226037	0.644789	1	0.838038	Xenobiotics	Bacterial/Fungal	NA
1-(1-enyl-palmitoyl)-2-linoleoyl-GPE (P-16:0/18:2)*	52677	922	-0.00133773	0.645411	1	0.838038	Lipid	Plasmalogen	HMDB11343
4-guanidinobutanoate	15681	880	0.00203667	0.647754	1	0.83964	Amino Acid	Guanidino and Acetamido Metabolism	HMDB03464
sphingomyelin (d18:1/19:0, d19:1/18:0)*	57475	923	-0.000911482	0.651989	1	0.843685	Lipid	Sphingolipid Metabolism	NA
N-acetylhistidine	33946	914	-0.0012983	0.653105	1	0.843687	Amino Acid	Histidine Metabolism	HMDB32055
3-methylglutaconate	57747	923	0.00147662	0.655235	1	0.844035	Amino Acid	Leucine, Isoleucine and Valine Metabolism	HMDB00522
arabitol/xylitol	48885	923	-0.000827296	0.656424	1	0.844035	Carbohydrate	Pentose Metabolism	NA
behenoyl sphingomyelin (d18:1/22:0)*	48492	923	0.000669266	0.657107	1	0.844035	Lipid	Sphingolipid Metabolism	HMDB12103
3-hydroxyisobutyrate	1549	914	0.00122753	0.658292	1	0.844035	Amino Acid	Leucine, Isoleucine and Valine Metabolism	HMDB00336
3-hydroxyoctanoate	22001	923	-0.00149327	0.660753	1	0.844035	Lipid	Fatty Acid, Monohydroxy	HMDB01954
leucine	60	923	-0.000448399	0.6613	1	0.844035	Amino Acid	Leucine, Isoleucine and Valine Metabolism	HMDB00687
sphingomyelin (d18:2/14:0, d18:1/14:1)*	47154	923	0.00102003	0.662677	1	0.844035	Lipid	Sphingolipid Metabolism	NA
palmitoylcholine	52944	923	0.00213679	0.662815	1	0.844035	Lipid	Fatty Acid Metabolism (Acyl Choline)	NA
gamma-glutamylalanine	37063	917	-0.00161272	0.66341	1	0.844035	Peptide	Gamma-glutamyl Amino Acid	HMDB29142
2-acetamidophenol sulfate	48580	471	-0.00378504	0.665183	1	0.844318	Xenobiotics	Drug - Analgesics, Anesthetics	NA
acisoga	43258	766	0.00173467	0.667869	1	0.844318	Amino Acid	Polyamine Metabolism	NA
glycosyl ceramide (d18:1/20:0, d16:1/22:0)*	57595	923	-0.000919326	0.667943	1	0.844318	Lipid	Ceramides	NA
1-myristoyl-2-arachidonoyl-GPC (14:0/20:4)*	53195	923	0.0015103	0.668093	1	0.844318	Lipid	Phosphatidylcholine (PC)	HMDB07883
glycochenodeoxycholate glucuronide (1)	52983	898	0.00283901	0.673913	1	0.850254	Lipid	Primary Bile Acid Metabolism	NA
1-methylxanthine	34389	799	0.002891	0.676877	1	0.852573	Xenobiotics	Xanthine Metabolism	HMDB10738
2-hydroxyoctanoate	22036	901	0.00162674	0.679306	1	0.85421	Lipid	Fatty Acid, Monohydroxy	HMDB02264
androstenediol (3alpha, 17alpha) monosulfate (3)	37209	909	0.00184672	0.683842	1	0.856563	Lipid	Androgenic Steroids	NA
1-stearoyl-2-arachidonoyl-GPC (18:0/20:4)	42450	923	-0.000540104	0.684501	1	0.856563	Lipid	Phosphatidylcholine (PC)	HMDB08048
hexanoylglycine	35436	581	0.00211523	0.685861	1	0.856563	Lipid	Fatty Acid Metabolism(Acyl Glycine)	HMDB00701
1-linolenoyl-GPC (18:3)*	45951	923	0.00158119	0.686491	1	0.856563	Lipid	Lysophospholipid	HMDB10388
3-methylglutarylcarnitine (2)	46548	921	-0.00197518	0.687395	1	0.856563	Amino Acid	Leucine, Isoleucine and Valine Metabolism	HMDB00552
glycerophosphorylcholine (GPC)	15990	923	-0.000967333	0.688587	1	0.856563	Lipid	Phospholipid Metabolism	HMDB00086
ethylmalonate	15765	923	-0.00122274	0.689097	1	0.856563	Amino Acid	Leucine, Isoleucine and Valine Metabolism	HMDB00622
1-palmitoyl-GPE (16:0)	35631	923	0.000927429	0.690783	1	0.85725	Lipid	Lysophospholipid	HMDB11503
2-linoleoylglycerol (18:2)	32506	542	-0.00187058	0.703281	1	0.87013	Lipid	Monoacylglycerol	HMDB11538
myristoyl dihydrosphingomyelin (d18:0/14:0)*	57365	923	-0.000831261	0.703461	1	0.87013	Lipid	Sphingolipid Metabolism	HMDB12085
imidazole lactate	15716	923	0.000893258	0.704878	1	0.87038	Amino Acid	Histidine Metabolism	HMDB02320
3-hydroxybutyrate (BHBA)	542	923	0.00241724	0.71002	1	0.87038	Lipid	Ketone Bodies	HMDB00357
isoeugenol sulfate	48997	244	-0.00468983	0.711125	1	0.87038	Xenobiotics	Food Component/Plant	NA
methyl indole-3-acetate	1584	768	-0.00176316	0.711215	1	0.87038	Xenobiotics	Food Component/Plant	HMDB29738
bilirubin (E,E)*	32586	923	0.00139714	0.712673	1	0.87038	Cofactors and Vitamins	Hemoglobin and Porphyrin Metabolism	NA
1-stearoyl-2-linoleoyl-GPI (18:0/18:2)	52468	922	0.000972193	0.715126	1	0.87038	Lipid	Phosphatidylinositol (PI)	HMDB09809
glycine	58	923	0.000608793	0.715999	1	0.87038	Amino Acid	Glycine, Serine and Threonine Metabolism	HMDB00123
N-methylproline	37431	923	0.00307168	0.717195	1	0.87038	Amino Acid	Urea cycle; Arginine and Proline Metabolism	NA
oleoylcholine	53260	920	-0.0018452	0.717684	1	0.87038	Lipid	Fatty Acid Metabolism (Acyl Choline)	NA
1-(1-enyl-palmitoyl)-GPC (P-16:0)*	52474	923	0.000971114	0.718885	1	0.87038	Lipid	Lysoplasmalogen	HMDB10407
dihomo-linolenoylcarnitine (20:3n3 or 6)*	57521	920	-0.000901249	0.719147	1	0.87038	Lipid	Fatty Acid Metabolism(Acyl Carnitine)	NA
androsterone sulfate	31591	920	-0.00223514	0.719674	1	0.87038	Lipid	Androgenic Steroids	HMDB02759
stearoylcholine*	57464	907	-0.00189425	0.719898	1	0.87038	Lipid	Fatty Acid Metabolism (Acyl Choline)	NA
4-acetamidophenol	12032	176	0.0115703	0.7199	1	0.87038	Xenobiotics	Drug - Analgesics, Anesthetics	HMDB01859
3-aminoisobutyrate	1566	923	-0.00111061	0.721049	1	0.87038	Nucleotide	Pyrimidine Metabolism, Thymine containing	HMDB03911
guanidinosuccinate	32446	596	-0.00190495	0.722897	1	0.87038	Amino Acid	Guanidino and Acetamido Metabolism	HMDB03157
I-urobilinogen	32426	342	0.00413485	0.723716	1	0.87038	Cofactors and Vitamins	Hemoglobin and Porphyrin Metabolism	HMDB04157
oleoyl-linoleoyl-glycerol (18:1/18:2) [1]	46798	923	-0.00127584	0.725198	1	0.87038	Lipid	Diacylglycerol	HMDB07219
4-acetylphenol sulfate	44620	454	0.00345568	0.725508	1	0.87038	Xenobiotics	Drug - Other	NA
salicyluric glucuronide*	33384	565	0.00603739	0.727314	1	0.871166	Xenobiotics	Drug - Analgesics, Anesthetics	NA
gamma-glutamylglutamine	2730	923	0.00052631	0.733822	1	0.877573	Peptide	Gamma-glutamyl Amino Acid	HMDB11738
docosapentaenoate (n6 DPA; 22:5n6)	37478	855	-0.00104761	0.73646	1	0.879	Lipid	Polyunsaturated Fatty Acid (n3 and n6)	HMDB01976
citrate	1564	923	-0.000323038	0.737604	1	0.879	Energy	TCA Cycle	HMDB00094
butyrylcarnitine (C4)	32412	920	-0.00107655	0.7385	1	0.879	Lipid	Fatty Acid Metabolism (also BCAA Metabolism)	HMDB02013
gamma-glutamylmethionine	44872	923	-0.000533936	0.746529	1	0.884796	Peptide	Gamma-glutamyl Amino Acid	HMDB29155
3-methoxytyramine sulfate	44618	361	0.00175445	0.746815	1	0.884796	Amino Acid	Tyrosine Metabolism	NA
glycosyl-N-behenoyl-sphingadienine (d18:2/22:0)*	57421	923	0.000764411	0.746875	1	0.884796	Lipid	Ceramides	NA
methylmalonate (MMA)	1496	880	0.0014231	0.749459	1	0.885714	Lipid	Fatty Acid Metabolism (also BCAA Metabolism)	HMDB00202
17alpha-hydroxypregnenolone 3-sulfate	37482	200	0.00300903	0.750421	1	0.885714	Lipid	Pregnenolone Steroids	HMDB00416
erythritol	20699	923	0.00121787	0.75116	1	0.885714	Xenobiotics	Food Component/Plant	HMDB02994
androstenediol (3beta,17beta) monosulfate (2)	37210	874	-0.00175423	0.752511	1	0.885927	Lipid	Androgenic Steroids	NA
10-nonadecenoate (19:1n9)	33972	923	-0.00112637	0.75592	1	0.887218	Lipid	Long Chain Fatty Acid	HMDB13622
thymol sulfate	36095	879	-0.00403676	0.755952	1	0.887218	Xenobiotics	Food Component/Plant	HMDB01878
2-aminoheptanoate	43761	921	-0.00107368	0.759169	1	0.888483	Lipid	Fatty Acid, Amino	NA
phenylpyruvate	566	889	-0.000745717	0.759462	1	0.888483	Amino Acid	Phenylalanine Metabolism	HMDB00205
sphingomyelin (d18:0/18:0, d19:0/17:0)*	57473	923	-0.000966331	0.760551	1	0.888483	Lipid	Sphingolipid Metabolism	HMDB12087
4-hydroxyphenylpyruvate	1669	900	0.000886971	0.763403	1	0.890219	Amino Acid	Tyrosine Metabolism	HMDB00707
xanthurenate	15679	844	0.00132835	0.764389	1	0.890219	Amino Acid	Tryptophan Metabolism	HMDB00881
glutamine	53	923	-0.000234688	0.768426	1	0.893546	Amino Acid	Glutamate Metabolism	HMDB00641
1-palmitoyl-2-arachidonoyl-GPC (16:0/20:4n6)	52462	923	-0.000417232	0.770842	1	0.893798	Lipid	Phosphatidylcholine (PC)	HMDB07982
linoleoyl-arachidonoyl-glycerol (18:2/20:4) [1]*	54955	853	0.0014277	0.771753	1	0.893798	Lipid	Diacylglycerol	HMDB07257
1,2-dilinoleoyl-GPC (18:2/18:2)	52603	922	-0.000683656	0.772672	1	0.893798	Lipid	Phosphatidylcholine (PC)	HMDB08138
arachidonoylcarnitine (C20:4)	57518	920	-0.000769086	0.774156	1	0.893798	Lipid	Fatty Acid Metabolism(Acyl Carnitine)	NA
N-acetylarginine	33953	923	0.000790511	0.774546	1	0.893798	Amino Acid	Urea cycle; Arginine and Proline Metabolism	HMDB04620
5alpha-pregnan-3(alpha or beta),20beta-diol disulfate	46172	393	-0.00267916	0.778701	1	0.897225	Lipid	Progestin Steroids	NA
gamma-glutamyl-alpha-lysine	55015	923	0.000387464	0.782916	1	0.900711	Peptide	Gamma-glutamyl Amino Acid	NA
2-stearoyl-GPE (18:0)*	41220	923	0.000699913	0.788492	1	0.904939	Lipid	Lysophospholipid	HMDB11129
1-arachidonoyl-GPC (20:4n6)*	33228	923	-0.000641858	0.789593	1	0.904939	Lipid	Lysophospholipid	HMDB10395
glycocholate	18476	917	0.00223599	0.790178	1	0.904939	Lipid	Primary Bile Acid Metabolism	HMDB00138
oleoyl-linoleoyl-glycerol (18:1/18:2) [2]	46799	923	-0.000935247	0.795428	1	0.909576	Lipid	Diacylglycerol	HMDB07219
sphingomyelin (d18:2/21:0, d16:2/23:0)*	57480	923	0.00049957	0.798281	1	0.911461	Lipid	Sphingolipid Metabolism	NA
acesulfame	48569	453	0.00516548	0.800341	1	0.912437	Xenobiotics	Food Component/Plant	HMDB33585
N-formylphenylalanine	48433	685	0.000834901	0.805046	1	0.915164	Amino Acid	Tyrosine Metabolism	NA
cytosine	573	436	-0.00204787	0.805808	1	0.915164	Nucleotide	Pyrimidine Metabolism, Cytidine containing	HMDB00630
oleoyl-arachidonoyl-glycerol (18:1/20:4) [2]*	54961	877	-0.00101649	0.806359	1	0.915164	Lipid	Diacylglycerol	HMDB07228
deoxycholate	1114	896	-0.00100991	0.808263	1	0.91595	Lipid	Secondary Bile Acid Metabolism	HMDB00626
glycocholenate sulfate*	57741	923	-0.00075275	0.811074	1	0.917143	Lipid	Secondary Bile Acid Metabolism	NA
N-acetyltyrosine	32390	837	-0.000756716	0.811739	1	0.917143	Amino Acid	Tyrosine Metabolism	HMDB00866
5,6-dihydrothymine	1418	922	0.000473481	0.815747	1	0.920299	Nucleotide	Pyrimidine Metabolism, Thymine containing	HMDB00079
beta-hydroxyisovalerate	12129	923	0.000514947	0.821914	1	0.925877	Amino Acid	Leucine, Isoleucine and Valine Metabolism	HMDB00754
1-methylurate	34395	668	-0.00163468	0.825241	1	0.926729	Xenobiotics	Xanthine Metabolism	HMDB03099
urate	1604	923	0.000332671	0.825338	1	0.926729	Nucleotide	Purine Metabolism, (Hypo)Xanthine/Inosine containing	HMDB00289
sphingomyelin (d17:2/16:0, d18:2/15:0)*	57483	923	-0.000501214	0.827599	1	0.926729	Lipid	Sphingolipid Metabolism	NA
sarcosine	1516	923	0.000389471	0.828725	1	0.926729	Amino Acid	Glycine, Serine and Threonine Metabolism	HMDB00271
5,6-dihydrouracil	1559	462	0.000724614	0.828792	1	0.926729	Nucleotide	Pyrimidine Metabolism, Uracil containing	HMDB00076
choline phosphate	34396	915	-0.00054782	0.832727	1	0.929756	Lipid	Phospholipid Metabolism	HMDB01565
5alpha-pregnan-3beta,20beta-diol monosulfate (1)	37196	816	-0.00120735	0.838231	1	0.934523	Lipid	Progestin Steroids	NA
glycolithocholate	31912	666	0.00147889	0.842035	1	0.936521	Lipid	Secondary Bile Acid Metabolism	HMDB00698
glycyrrhetinate	39789	190	0.00266299	0.843454	1	0.936521	Xenobiotics	Food Component/Plant	HMDB11628
9,10-DiHOME	38399	558	-0.000879196	0.844039	1	0.936521	Lipid	Fatty Acid, Dihydroxy	HMDB04704
pregnen-diol disulfate C21H34O8S2*	32562	923	-0.00104821	0.845824	1	0.936521	Lipid	Pregnenolone Steroids	NA
beta-alanine	55	923	-0.000358659	0.847186	1	0.936521	Nucleotide	Pyrimidine Metabolism, Uracil containing	HMDB00056
cystathionine	15705	877	0.000993501	0.848113	1	0.936521	Amino Acid	Methionine, Cysteine, SAM and Taurine Metabolism	HMDB00099
N-acetylasparagine	33942	923	0.000531046	0.848684	1	0.936521	Amino Acid	Alanine and Aspartate Metabolism	HMDB06028
phenol glucuronide	52747	532	-0.00171183	0.850121	1	0.936742	Amino Acid	Tyrosine Metabolism	HMDB60014
eugenol sulfate	48715	683	0.0018677	0.852946	1	0.938489	Xenobiotics	Food Component/Plant	NA
mannose	48153	923	-0.000284594	0.856078	1	0.940568	Carbohydrate	Fructose, Mannose and Galactose Metabolism	HMDB00169
succinimide	41888	906	-0.000465814	0.860221	1	0.941812	Xenobiotics	Chemical	NA
N-acetylglutamine	33943	914	-0.000537605	0.861277	1	0.941812	Amino Acid	Glutamate Metabolism	HMDB06029
glucuronate	15443	923	0.000743086	0.861629	1	0.941812	Carbohydrate	Aminosugar Metabolism	HMDB00127
gluconate	587	923	0.000391148	0.862187	1	0.941812	Xenobiotics	Food Component/Plant	HMDB00625
glycerol	15122	923	-0.000518475	0.865016	1	0.943506	Lipid	Glycerolipid Metabolism	HMDB00131
tauro-beta-muricholate	33983	433	-0.00171382	0.867903	1	0.943506	Lipid	Primary Bile Acid Metabolism	HMDB00932
sphingomyelin (d18:1/20:2, d18:2/20:1, d16:1/22:2)*	57481	922	-0.000422423	0.867995	1	0.943506	Lipid	Sphingolipid Metabolism	NA
cys-gly, oxidized	18368	877	-0.000462923	0.868724	1	0.943506	Amino Acid	Glutathione Metabolism	NA
N6-acetyllysine	36752	923	0.000307146	0.87047	1	0.944049	Amino Acid	Lysine Metabolism	HMDB00206
umbelliferone sulfate	48674	473	0.00173143	0.878989	1	0.951924	Xenobiotics	Food Component/Plant	NA
kynurenate	1417	923	0.00038495	0.880707	1	0.952422	Amino Acid	Tryptophan Metabolism	HMDB00715
5alpha-androstan-3alpha,17beta-diol disulfate	37184	399	-0.00144722	0.882575	1	0.952737	Lipid	Androgenic Steroids	NA
3-hydroxydecanoate	22053	923	-0.000523902	0.883516	1	0.952737	Lipid	Fatty Acid, Monohydroxy	HMDB02203
isovalerylglycine	35107	672	0.000606771	0.891596	1	0.960006	Amino Acid	Leucine, Isoleucine and Valine Metabolism	HMDB00678
lignoceroylcarnitine (C24)*	57515	923	-0.000377849	0.892792	1	0.960006	Lipid	Fatty Acid Metabolism(Acyl Carnitine)	NA
7-ketodeoxycholate	31904	206	0.00211941	0.896143	1	0.962241	Lipid	Secondary Bile Acid Metabolism	HMDB00391
7-alpha-hydroxy-3-oxo-4-cholestenoate (7-Hoca)	36776	923	-0.000261309	0.899118	1	0.963157	Lipid	Sterol	HMDB12458
hexadecanedioate (C16-DC)	35678	922	0.000472822	0.89954	1	0.963157	Lipid	Fatty Acid, Dicarboxylate	HMDB00672
3,4-methyleneheptanoylcarnitine	52929	580	-0.000690382	0.903238	1	0.965382	Lipid	Fatty Acid Metabolism(Acyl Carnitine)	NA
glyco-beta-muricholate**	62066	758	0.000888587	0.90506	1	0.965382	Lipid	Primary Bile Acid Metabolism	NA
glutamate	57	923	0.000371337	0.905444	1	0.965382	Amino Acid	Glutamate Metabolism	HMDB00148
glycocholate glucuronide (1)	52977	482	-0.00108248	0.909475	1	0.967208	Lipid	Primary Bile Acid Metabolism	NA
1-(1-enyl-oleoyl)-GPE (P-18:1)*	44621	893	0.000430378	0.910967	1	0.967208	Lipid	Lysoplasmalogen	NA
succinate	1437	922	0.000619599	0.912191	1	0.967208	Energy	TCA Cycle	HMDB00254
1-stearoyl-GPC (18:0)	33961	923	0.000161725	0.912281	1	0.967208	Lipid	Lysophospholipid	HMDB10384
caffeine	569	876	0.00111154	0.913715	1	0.967208	Xenobiotics	Xanthine Metabolism	HMDB01847
gamma-CEHC glucuronide*	42381	803	-0.000551148	0.917321	1	0.967208	Cofactors and Vitamins	Tocopherol Metabolism	NA
tyrosine	1299	923	0.000128274	0.91987	1	0.967208	Amino Acid	Tyrosine Metabolism	HMDB00158
21-hydroxypregnenolone disulfate	46115	915	-0.000466437	0.920066	1	0.967208	Lipid	Pregnenolone Steroids	NA
docosadioate (C22-DC)	39837	921	0.000354843	0.920353	1	0.967208	Lipid	Fatty Acid, Dicarboxylate	NA
glycerol 3-phosphate	43847	899	0.000258699	0.920511	1	0.967208	Lipid	Glycerolipid Metabolism	HMDB00126
lactosyl-N-behenoyl-sphingosine (d18:1/22:0)*	57422	915	0.000268317	0.921746	1	0.967208	Lipid	Sphingolipid Metabolism	NA
margarate (17:0)	1121	923	0.000281701	0.922489	1	0.967208	Lipid	Long Chain Fatty Acid	HMDB02259
indoleacetate	27513	923	0.000298222	0.931383	1	0.975183	Amino Acid	Tryptophan Metabolism	HMDB00197
bilirubin (Z,Z)	43807	923	0.0002096	0.932862	1	0.975382	Cofactors and Vitamins	Hemoglobin and Porphyrin Metabolism	HMDB00054
methionine sulfone	44878	923	0.000219367	0.937933	1	0.978539	Amino Acid	Methionine, Cysteine, SAM and Taurine Metabolism	NA
fumarate	1643	920	-0.000220516	0.938467	1	0.978539	Energy	TCA Cycle	HMDB00134
palmitoyl ethanolamide	38165	923	-0.000133143	0.9411	1	0.979935	Lipid	Endocannabinoid	HMDB02100
pimeloylcarnitine/3-methyladipoylcarnitine (C7-DC)	53224	708	0.000278369	0.944137	1	0.981447	Lipid	Fatty Acid Metabolism(Acyl Carnitine)	NA
andro steroid monosulfate C19H28O6S (1)*	32827	775	-0.000380865	0.94568	1	0.981447	Lipid	Androgenic Steroids	HMDB02759
androstenediol (3beta,17beta) disulfate (2)	37203	921	-0.000335339	0.946442	1	0.981447	Lipid	Androgenic Steroids	HMDB03818
palmitoleate (16:1n7)	33447	923	0.000267081	0.953234	1	0.98571	Lipid	Long Chain Fatty Acid	HMDB03229
3-carboxy-4-methyl-5-pentyl-2-furanpropionate (3-Cmpfp)**	61871	923	0.000175388	0.954628	1	0.98571	Lipid	Fatty Acid, Dicarboxylate	NA
ectoine	35651	862	-0.000387662	0.95544	1	0.98571	Xenobiotics	Chemical	NA
3-hydroxy-3-methylglutarate	531	919	-0.000130984	0.955761	1	0.98571	Lipid	Mevalonate Metabolism	HMDB00355
trimethylamine N-oxide	40406	923	0.000235181	0.958896	1	0.987598	Lipid	Phospholipid Metabolism	HMDB00925
ethyl glucuronide	39603	351	0.000654384	0.961915	1	0.988791	Xenobiotics	Chemical	HMDB10325
glycerophosphoethanolamine	37455	923	0.00025234	0.963364	1	0.988791	Lipid	Phospholipid Metabolism	HMDB00114
alpha-hydroxyisocaproate	22132	922	-0.000103833	0.964126	1	0.988791	Amino Acid	Leucine, Isoleucine and Valine Metabolism	HMDB00746
methyl-4-hydroxybenzoate sulfate	48429	892	0.000544592	0.966056	1	0.988791	Xenobiotics	Benzoate Metabolism	NA
valine	1649	923	5.50414e-05	0.966585	1	0.988791	Amino Acid	Leucine, Isoleucine and Valine Metabolism	HMDB00883
3-hydroxylaurate	32457	923	-0.000154123	0.968519	1	0.989432	Lipid	Fatty Acid, Monohydroxy	HMDB00387
1-(1-enyl-palmitoyl)-2-arachidonoyl-GPC (P-16:0/20:4)*	52689	923	-6.87127e-05	0.972409	1	0.992067	Lipid	Plasmalogen	HMDB11220
4-methyl-2-oxopentanoate	22116	923	-5.28613e-05	0.974707	1	0.992459	Amino Acid	Leucine, Isoleucine and Valine Metabolism	HMDB00695
1-oleoylglycerol (18:1)	21184	897	0.000123781	0.975416	1	0.992459	Lipid	Monoacylglycerol	HMDB11567
phenylacetylcarnitine	48425	805	0.000160787	0.979249	1	0.995002	Peptide	Acetylated Peptides	NA
5-acetylamino-6-formylamino-3-methyluracil	34401	777	-0.000186657	0.982551	1	0.995002	Xenobiotics	Xanthine Metabolism	HMDB11105
1,3-dimethylurate	32391	779	-0.000142666	0.982922	1	0.995002	Xenobiotics	Xanthine Metabolism	HMDB01857
perfluorooctanesulfonic acid (PFOS)	57564	923	-0.000104	0.983172	1	0.995002	Xenobiotics	Chemical	HMDB59586
octadecanedioylcarnitine (C18-DC)*	61867	914	6.42693e-05	0.986677	1	0.99576	Lipid	Fatty Acid Metabolism(Acyl Carnitine)	NA
androstenediol (3beta,17beta) disulfate (1)	37202	922	8.49828e-05	0.988353	1	0.99576	Lipid	Androgenic Steroids	HMDB03818
glycochenodeoxycholate	32346	918	-9.506e-05	0.989592	1	0.99576	Lipid	Primary Bile Acid Metabolism	HMDB00637
gamma-glutamyl-epsilon-lysine	33934	901	-2.5881e-05	0.989688	1	0.99576	Peptide	Gamma-glutamyl Amino Acid	HMDB03869
3-(3-hydroxyphenyl)propionate	35635	529	0.000103616	0.990498	1	0.99576	Xenobiotics	Benzoate Metabolism	HMDB00375
3-methylcytidine	35132	920	-1.15585e-05	0.995289	1	0.998638	Nucleotide	Pyrimidine Metabolism, Cytidine containing	NA
propyl 4-hydroxybenzoate sulfate	48460	497	-6.62167e-05	0.995999	1	0.998638	Xenobiotics	Benzoate Metabolism	NA
arachidonoylcholine	53261	920	-1.08115e-05	0.99819	1	0.99951	Lipid	Fatty Acid Metabolism (Acyl Choline)	NA
1-palmitoyl-GPC (16:0)	33955	923	-7.20538e-07	0.999568	1	0.999568	Lipid	Lysophospholipid	HMDB10382

## Sheet: Supplemental Table 5
Supplemental Table 8. The sensitivity results of the association tests between each plasma metabolite and MIND diet score.
Biochemical Names	Compound ID	N	Beta	P	Adjusted P	FDR q	Super pathway	Sub-pathway	HMDB ID
linoleate (18:2n6)	1105	919	0.00763557	0.0105886	1	0.0756085	Lipid	Polyunsaturated Fatty Acid (n3 and n6)	HMDB00673
allantoin	1107	919	0.00176822	0.165321	1	0.393674	Nucleotide	Purine Metabolism, (Hypo)Xanthine/Inosine containing	HMDB00462
arachidonate (20:4n6)	1110	919	0.00367518	0.157999	1	0.383351	Lipid	Polyunsaturated Fatty Acid (n3 and n6)	HMDB01043
deoxycholate	1114	892	-0.00120547	0.773384	1	0.899312	Lipid	Secondary Bile Acid Metabolism	HMDB00626
arachidate (20:0)	1118	919	0.00147127	0.348737	1	0.616808	Lipid	Long Chain Fatty Acid	HMDB02212
margarate (17:0)	1121	919	0.000130316	0.964218	1	0.981066	Lipid	Long Chain Fatty Acid	HMDB02259
inosine	1123	886	-0.0141728	0.0002008	0.152005	0.00434301	Nucleotide	Purine Metabolism, (Hypo)Xanthine/Inosine containing	HMDB00195
myo-inositol	1124	919	0.00328849	0.262597	1	0.525119	Lipid	Inositol Metabolism	HMDB00211
isoleucine	1125	919	-0.00258989	0.0186584	1	0.104625	Amino Acid	Leucine, Isoleucine and Valine Metabolism	HMDB00172
alanine	1126	919	-0.00108481	0.460217	1	0.713903	Amino Acid	Alanine and Aspartate Metabolism	HMDB00161
3-methoxytyrosine	12017	919	-0.00269351	0.295663	1	0.552635	Amino Acid	Tyrosine Metabolism	HMDB01434
4-acetamidophenol	12032	176	0.0084932	0.794379	1	0.907006	Xenobiotics	Drug - Analgesics, Anesthetics	HMDB01859
beta-hydroxyisovalerate	12129	919	0.000374289	0.870915	1	0.9541	Amino Acid	Leucine, Isoleucine and Valine Metabolism	HMDB00754
taurodeoxycholate	12261	817	-0.00594655	0.509931	1	0.745209	Lipid	Secondary Bile Acid Metabolism	HMDB00896
threonine	1284	919	-0.000565108	0.714525	1	0.868493	Amino Acid	Glycine, Serine and Threonine Metabolism	HMDB00167
tyrosine	1299	919	0.000144383	0.910442	1	0.972098	Amino Acid	Tyrosine Metabolism	HMDB00158
lysine	1301	919	0.00155488	0.127035	1	0.334138	Amino Acid	Lysine Metabolism	HMDB00182
methionine	1302	919	-0.00156081	0.2101	1	0.457027	Amino Acid	Methionine, Cysteine, SAM and Taurine Metabolism	HMDB00696
malate	1303	919	-0.0033165	0.028855	1	0.144657	Energy	TCA Cycle	HMDB00156
palmitate (16:0)	1336	919	0.00118852	0.585189	1	0.800121	Lipid	Long Chain Fatty Acid	HMDB00220
nonadecanoate (19:0)	1356	919	0.00192468	0.339021	1	0.603855	Lipid	Long Chain Fatty Acid	HMDB00772
stearate (18:0)	1358	919	0.00115623	0.499222	1	0.733808	Lipid	Long Chain Fatty Acid	HMDB00827
pentadecanoate (15:0)	1361	919	-0.00204205	0.358416	1	0.629516	Lipid	Long Chain Fatty Acid	HMDB00826
myristate (14:0)	1365	919	-0.00133312	0.691569	1	0.852634	Lipid	Long Chain Fatty Acid	HMDB00806
kynurenate	1417	919	0.000444162	0.863553	1	0.948183	Amino Acid	Tryptophan Metabolism	HMDB00715
5,6-dihydrothymine	1418	918	-4.41551e-05	0.982732	1	0.989266	Nucleotide	Pyrimidine Metabolism, Thymine containing	HMDB00079
5-methylthioadenosine (MTA)	1419	919	-0.000985167	0.614395	1	0.805482	Amino Acid	Polyamine Metabolism	HMDB01173
2-hydroxyphenylacetate	1432	824	-0.00789683	0.0259274	1	0.131725	Amino Acid	Tyrosine Metabolism	HMDB00669
succinate	1437	918	0.000636081	0.910623	1	0.972098	Energy	TCA Cycle	HMDB00254
pipecolate	1444	918	0.0103465	0.015379	1	0.0970158	Amino Acid	Lysine Metabolism	HMDB00070
ornithine	1493	919	-0.000790135	0.587672	1	0.800121	Amino Acid	Urea cycle; Arginine and Proline Metabolism	HMDB03374
5-oxoproline	1494	919	-0.00208026	0.106473	1	0.313619	Amino Acid	Glutathione Metabolism	HMDB00267
methylmalonate (MMA)	1496	876	0.00166112	0.711975	1	0.867899	Lipid	Fatty Acid Metabolism (also BCAA Metabolism)	HMDB00202
N6,N6,N6-trimethyllysine	1498	919	-0.00436485	0.123412	1	0.334138	Amino Acid	Lysine Metabolism	HMDB01325
orotate	1505	919	-0.00522364	0.0672636	1	0.236831	Nucleotide	Pyrimidine Metabolism, Orotate containing	HMDB00226
pantothenate	1508	919	0.00811618	0.0327054	1	0.156696	Cofactors and Vitamins	Pantothenate and CoA Metabolism	HMDB00210
glycerol	15122	919	-0.000382627	0.900924	1	0.969259	Lipid	Glycerolipid Metabolism	HMDB00131
kynurenine	15140	919	-0.00374126	0.0382844	1	0.171328	Amino Acid	Tryptophan Metabolism	HMDB00684
salicylate	1515	918	0.010519	0.395418	1	0.667338	Xenobiotics	Drug - Topical Agents	HMDB01895
sarcosine	1516	919	0.000370025	0.837841	1	0.934087	Amino Acid	Glycine, Serine and Threonine Metabolism	HMDB00271
tartarate	15336	768	-0.005073	0.396129	1	0.667338	Xenobiotics	Food Component/Plant	HMDB00956
glucuronate	15443	919	0.000786216	0.854876	1	0.944732	Carbohydrate	Aminosugar Metabolism	HMDB00127
3-hydroxyisobutyrate	1549	910	0.000752618	0.787467	1	0.901835	Amino Acid	Leucine, Isoleucine and Valine Metabolism	HMDB00336
carnitine	15500	919	0.00180296	0.171176	1	0.401177	Lipid	Carnitine Metabolism	HMDB00062
choline	15506	919	-0.000979731	0.47068	1	0.717754	Lipid	Phospholipid Metabolism	HMDB00097
erucate (22:1n9)	1552	917	0.00620448	0.0855272	1	0.272034	Lipid	Long Chain Fatty Acid	HMDB02068
4-acetamidobutanoate	1558	912	0.00180619	0.533983	1	0.760574	Amino Acid	Polyamine Metabolism	HMDB03681
xylose	15581	812	-0.0014261	0.617979	1	0.805482	Carbohydrate	Pentose Metabolism	HMDB00098
maltose	15586	515	-0.0206354	0.0106871	1	0.0756085	Carbohydrate	Glycogen Metabolism	HMDB00163
5,6-dihydrouracil	1559	460	-5.96736e-05	0.985929	1	0.991166	Nucleotide	Pyrimidine Metabolism, Uracil containing	HMDB00076
alpha-tocopherol	1561	919	0.0054841	0.0048238	1	0.046223	Cofactors and Vitamins	Tocopherol Metabolism	HMDB01893
chenodeoxycholate	1563	550	0.00916321	0.125777	1	0.334138	Lipid	Primary Bile Acid Metabolism	HMDB00518
citrate	1564	919	-0.000304817	0.753608	1	0.891377	Energy	TCA Cycle	HMDB00094
N1-methyladenosine	15650	919	-0.00272038	0.034537	1	0.161972	Nucleotide	Purine Metabolism, Adenine containing	HMDB03331
3-aminoisobutyrate	1566	919	-0.00159566	0.609528	1	0.805482	Nucleotide	Pyrimidine Metabolism, Thymine containing	HMDB03911
vanillylmandelate (VMA)	1567	918	-0.00524699	0.0346625	1	0.161972	Amino Acid	Tyrosine Metabolism	HMDB00291
3-methyl-2-oxovalerate	15676	919	-0.00223711	0.172289	1	0.4013	Amino Acid	Leucine, Isoleucine and Valine Metabolism	HMDB03736
3-methylhistidine	15677	912	0.0196033	0.0371106	1	0.170259	Amino Acid	Histidine Metabolism	HMDB00479
xanthurenate	15679	840	0.00141612	0.751561	1	0.890346	Amino Acid	Tryptophan Metabolism	HMDB00881
4-guanidinobutanoate	15681	876	0.00304364	0.495948	1	0.730414	Amino Acid	Guanidino and Acetamido Metabolism	HMDB03464
5-hydroxylysine	15685	843	-0.00284918	0.288694	1	0.548573	Amino Acid	Lysine Metabolism	HMDB00450
cystathionine	15705	874	0.00129238	0.804382	1	0.912919	Amino Acid	Methionine, Cysteine, SAM and Taurine Metabolism	HMDB00099
imidazole lactate	15716	919	0.00114474	0.630259	1	0.809209	Amino Acid	Histidine Metabolism	HMDB02320
glycerate	1572	919	0.00830496	0.000279623	0.211674	0.00542755	Carbohydrate	Glycolysis, Gluconeogenesis, and Pyruvate Metabolism	HMDB00139
N-acetylglutamate	15720	868	-0.003257	0.394504	1	0.667338	Amino Acid	Glutamate Metabolism	HMDB01138
4-acetamidophenylglucuronide	15736	301	-0.020971	0.523114	1	0.752095	Xenobiotics	Drug - Analgesics, Anesthetics	HMDB10316
methylsuccinate	15745	908	0.00282507	0.25959	1	0.522633	Amino Acid	Leucine, Isoleucine and Valine Metabolism	HMDB01844
3-phenylpropionate (hydrocinnamate)	15749	784	0.0406802	1.55372e-07	0.000117617	1.17617e-05	Xenobiotics	Benzoate Metabolism	HMDB00764
hippurate	15753	919	0.0247951	7.7018e-05	0.0583026	0.00208224	Xenobiotics	Benzoate Metabolism	HMDB00714
ethylmalonate	15765	919	-0.00195424	0.525908	1	0.754	Amino Acid	Leucine, Isoleucine and Valine Metabolism	HMDB00622
ribitol	15772	905	-0.00459512	0.0140765	1	0.0918612	Carbohydrate	Pentose Metabolism	HMDB00508
benzoate	15778	870	0.00554217	0.093502	1	0.287728	Xenobiotics	Benzoate Metabolism	HMDB01870
methyl indole-3-acetate	1584	766	-0.00230523	0.629219	1	0.809209	Xenobiotics	Food Component/Plant	HMDB29738
N-acetylalanine	1585	919	-0.00308837	0.00820367	1	0.0667604	Amino Acid	Alanine and Aspartate Metabolism	HMDB00766
N-acetylleucine	1587	867	-0.0038331	0.114468	1	0.328229	Amino Acid	Leucine, Isoleucine and Valine Metabolism	HMDB11756
N-acetylmethionine	1589	919	-0.00169248	0.366881	1	0.636992	Amino Acid	Methionine, Cysteine, SAM and Taurine Metabolism	HMDB11745
N-acetylvaline	1591	917	-0.00199015	0.211421	1	0.458584	Amino Acid	Leucine, Isoleucine and Valine Metabolism	HMDB11757
glycerophosphorylcholine (GPC)	15990	919	-0.00127298	0.598171	1	0.805482	Lipid	Phospholipid Metabolism	HMDB00086
phosphoethanolamine	1600	916	-0.00372969	0.244317	1	0.499859	Lipid	Phospholipid Metabolism	HMDB00224
urate	1604	919	0.000365916	0.809381	1	0.913117	Nucleotide	Purine Metabolism, (Hypo)Xanthine/Inosine containing	HMDB00289
arginine	1638	919	0.00255748	0.0817984	1	0.26542	Amino Acid	Urea cycle; Arginine and Proline Metabolism	HMDB00517
caprate (10:0)	1642	919	-0.0073004	0.0267232	1	0.134863	Lipid	Medium Chain Fatty Acid	HMDB00511
fumarate	1643	916	-0.000456937	0.874015	1	0.954732	Energy	TCA Cycle	HMDB00134
heptanoate (7:0)	1644	723	0.00603665	0.0920953	1	0.285722	Lipid	Medium Chain Fatty Acid	HMDB00666
laurate (12:0)	1645	919	-0.00652797	0.0713238	1	0.246539	Lipid	Medium Chain Fatty Acid	HMDB00638
serine	1648	919	0.00128998	0.344667	1	0.611037	Amino Acid	Glycine, Serine and Threonine Metabolism	HMDB00187
valine	1649	919	-0.000236853	0.857134	1	0.945846	Amino Acid	Leucine, Isoleucine and Valine Metabolism	HMDB00883
4-hydroxyphenylpyruvate	1669	896	0.00108498	0.714757	1	0.868493	Amino Acid	Tyrosine Metabolism	HMDB00707
urea	1670	919	0.000856701	0.665958	1	0.83386	Amino Acid	Urea cycle; Arginine and Proline Metabolism	HMDB00294
cortisol	1712	919	0.00410128	0.132306	1	0.342999	Lipid	Corticosteroids	HMDB00063
cortisone	1769	919	0.00453838	0.0763279	1	0.256453	Lipid	Corticosteroids	HMDB02802
sphingosine	17747	860	-0.0171507	5.33862e-06	0.00404134	0.000269422	Lipid	Sphingolipid Metabolism	HMDB00252
sphinganine	17769	681	-0.0123402	0.000330937	0.250519	0.00626298	Lipid	Sphingolipid Metabolism	HMDB00269
dihomo-linoleate (20:2n6)	17805	919	0.00814216	0.0196938	1	0.106188	Lipid	Polyunsaturated Fatty Acid (n3 and n6)	HMDB05060
2-hydroxystearate	17945	919	0.00292704	0.083137	1	0.267222	Lipid	Fatty Acid, Monohydroxy	NA
retinol (Vitamin A)	1806	919	0.00400371	0.0196982	1	0.106188	Cofactors and Vitamins	Vitamin A Metabolism	HMDB00305
gamma-glutamylhistidine	18245	919	-0.000892932	0.578284	1	0.798757	Peptide	Gamma-glutamyl Amino Acid	NA
paraxanthine	18254	790	-0.00268674	0.690637	1	0.852634	Xenobiotics	Xanthine Metabolism	HMDB01860
gentisate	18280	880	0.0115361	0.0358866	1	0.165647	Amino Acid	Tyrosine Metabolism	HMDB00152
2-hydroxyhippurate (salicylurate)	18281	917	0.00838871	0.535103	1	0.760574	Xenobiotics	Benzoate Metabolism	HMDB00840
quinate	18335	907	0.0568158	3.67614e-06	0.00278284	0.000198774	Xenobiotics	Food Component/Plant	HMDB03072
indolelactate	18349	919	0.00360479	0.133663	1	0.344158	Amino Acid	Tryptophan Metabolism	HMDB00671
cys-gly, oxidized	18368	873	-0.000849935	0.762344	1	0.893354	Amino Acid	Glutathione Metabolism	NA
gamma-glutamylleucine	18369	919	-0.00189991	0.292983	1	0.550342	Peptide	Gamma-glutamyl Amino Acid	HMDB11171
methionine sulfoxide	18374	919	0.00273043	0.0900029	1	0.281538	Amino Acid	Methionine, Cysteine, SAM and Taurine Metabolism	HMDB02005
theobromine	18392	909	-0.00873133	0.236061	1	0.490509	Xenobiotics	Xanthine Metabolism	HMDB02825
theophylline	18394	864	0.00870381	0.268743	1	0.528473	Xenobiotics	Xanthine Metabolism	HMDB01889
eicosapentaenoate (EPA; 20:5n3)	18467	919	0.0273269	3.0725e-08	2.32588e-05	4.75975e-06	Lipid	Polyunsaturated Fatty Acid (n3 and n6)	HMDB01999
glycocholate	18476	913	0.000791264	0.924772	1	0.977907	Lipid	Primary Bile Acid Metabolism	HMDB00138
glycodeoxycholate	18477	777	0.00595847	0.465699	1	0.715079	Lipid	Secondary Bile Acid Metabolism	HMDB00631
taurochenodeoxycholate	18494	855	-0.00703122	0.406261	1	0.672322	Lipid	Primary Bile Acid Metabolism	HMDB00951
taurocholate	18497	705	-0.00786202	0.461637	1	0.714641	Lipid	Primary Bile Acid Metabolism	HMDB00036
cysteine	1868	919	0.00204935	0.380876	1	0.652826	Amino Acid	Methionine, Cysteine, SAM and Taurine Metabolism	HMDB00574
proline	1898	919	-0.004336	0.0168767	1	0.101394	Amino Acid	Urea cycle; Arginine and Proline Metabolism	HMDB00162
quinolinate	1899	875	-0.0104079	0.000849672	0.643202	0.0126118	Cofactors and Vitamins	Nicotinate and Nicotinamide Metabolism	HMDB00232
1,2-dipalmitoyl-GPC (16:0/16:0)	19130	919	0.00198031	0.12172	1	0.334138	Lipid	Phosphatidylcholine (PC)	HMDB00564
1-myristoyl-2-palmitoyl-GPC (14:0/16:0)	19258	919	-0.00196872	0.603549	1	0.805482	Lipid	Phosphatidylcholine (PC)	HMDB07869
1-palmitoyl-2-oleoyl-GPE (16:0/18:1)	19263	913	-0.00870269	0.0222429	1	0.114543	Lipid	Phosphatidylethanolamine (PE)	HMDB05320
1-stearoyl-GPI (18:0)	19324	919	0.00539352	0.150552	1	0.370748	Lipid	Lysophospholipid	HMDB61696
stearoyl sphingomyelin (d18:1/18:0)	19503	919	0.00101244	0.518849	1	0.752095	Lipid	Sphingolipid Metabolism	HMDB01348
1,5-anhydroglucitol (1,5-AG)	20675	919	-0.00390364	0.212416	1	0.459426	Carbohydrate	Glycolysis, Gluconeogenesis, and Pyruvate Metabolism	HMDB02712
maleate	20676	882	-0.00917154	0.00388942	1	0.0397877	Lipid	Fatty Acid, Dicarboxylate	HMDB00176
tartronate (hydroxymalonate)	20693	917	0.014439	0.000180833	0.136891	0.00408497	Xenobiotics	Bacterial/Fungal	HMDB35227
oxalate (ethanedioate)	20694	919	0.0112458	0.000131581	0.0996071	0.00336617	Cofactors and Vitamins	Ascorbate and Aldarate Metabolism	HMDB02329
erythritol	20699	919	-0.000147552	0.969298	1	0.982268	Xenobiotics	Food Component/Plant	HMDB02994
iminodiacetate (IDA)	21025	919	0.00185224	0.292716	1	0.550342	Xenobiotics	Chemical	HMDB11753
saccharin	21151	513	-0.0132015	0.269907	1	0.529073	Xenobiotics	Food Component/Plant	HMDB29723
1-oleoylglycerol (18:1)	21184	893	-0.000302799	0.940347	1	0.97851	Lipid	Monoacylglycerol	HMDB11567
taurine	2125	919	0.000798052	0.659821	1	0.832474	Amino Acid	Methionine, Cysteine, SAM and Taurine Metabolism	HMDB00251
citrulline	2132	919	-0.00270757	0.0775795	1	0.256453	Amino Acid	Urea cycle; Arginine and Proline Metabolism	HMDB00904
biliverdin	2137	919	-0.00382145	0.237155	1	0.490509	Cofactors and Vitamins	Hemoglobin and Porphyrin Metabolism	HMDB01008
3-hydroxyoctanoate	22001	919	-0.00152802	0.656038	1	0.830413	Lipid	Fatty Acid, Monohydroxy	HMDB01954
2-hydroxyoctanoate	22036	897	0.00137949	0.727777	1	0.877401	Lipid	Fatty Acid, Monohydroxy	HMDB02264
3-hydroxydecanoate	22053	919	-0.000571902	0.873891	1	0.954732	Lipid	Fatty Acid, Monohydroxy	HMDB02203
4-methyl-2-oxopentanoate	22116	919	-0.000140685	0.933193	1	0.97851	Amino Acid	Leucine, Isoleucine and Valine Metabolism	HMDB00695
phenyllactate (PLA)	22130	919	-0.00148602	0.513319	1	0.747274	Amino Acid	Phenylalanine Metabolism	HMDB00779
alpha-hydroxyisocaproate	22132	918	0.000113394	0.960882	1	0.981066	Amino Acid	Leucine, Isoleucine and Valine Metabolism	HMDB00746
homoarginine	22137	919	0.00236796	0.399721	1	0.667967	Amino Acid	Urea cycle; Arginine and Proline Metabolism	HMDB00670
homocitrulline	22138	869	-0.00906942	0.0550369	1	0.210419	Amino Acid	Urea cycle; Arginine and Proline Metabolism	HMDB00679
EDTA	22163	919	0.000361991	0.672695	1	0.836174	Xenobiotics	Chemical	HMDB15109
cysteine s-sulfate	22176	919	-0.0105701	0.00126637	0.958645	0.0174299	Amino Acid	Methionine, Cysteine, SAM and Taurine Metabolism	HMDB00731
N-acetylaspartate (NAA)	22185	919	0.00302033	0.0139978	1	0.0918612	Amino Acid	Alanine and Aspartate Metabolism	HMDB00812
cholate	22842	824	0.0110892	0.272648	1	0.531149	Lipid	Primary Bile Acid Metabolism	HMDB00619
serotonin	2342	437	-0.0184245	0.145158	1	0.363856	Amino Acid	Tryptophan Metabolism	HMDB00259
gamma-glutamylglutamine	2730	919	0.000475489	0.760411	1	0.893354	Peptide	Gamma-glutamyl Amino Acid	HMDB11738
gamma-glutamyltyrosine	2734	917	-0.00233122	0.319213	1	0.579887	Peptide	Gamma-glutamyl Amino Acid	HMDB11741
1-linoleoylglycerol (18:2)	27447	910	0.00963116	0.00850873	1	0.0670949	Lipid	Monoacylglycerol	NA
indoleacetate	27513	919	0.0002071	0.95261	1	0.97851	Amino Acid	Tryptophan Metabolism	HMDB00197
thyroxine	2761	918	0.00105142	0.522823	1	0.752095	Amino Acid	Tyrosine Metabolism	HMDB01918
1-methylnicotinamide	27665	919	0.00272461	0.48191	1	0.720014	Cofactors and Vitamins	Nicotinate and Nicotinamide Metabolism	HMDB00699
3-indoxyl sulfate	27672	919	-0.00479263	0.23378	1	0.487525	Amino Acid	Tryptophan Metabolism	HMDB00682
N-acetylglycine	27710	919	0.00478566	0.206145	1	0.449716	Amino Acid	Glycine, Serine and Threonine Metabolism	HMDB00532
creatine	27718	919	0.00834149	0.00496138	1	0.0465309	Amino Acid	Creatine Metabolism	HMDB00064
galactonate	27719	758	-0.00717441	0.318007	1	0.579887	Carbohydrate	Fructose, Mannose and Galactose Metabolism	HMDB00565
ribonate	27731	919	-0.00114542	0.631206	1	0.809209	Carbohydrate	Pentose Metabolism	HMDB00867
threonate	27738	919	0.00918256	0.00926531	1	0.0701384	Cofactors and Vitamins	Ascorbate and Aldarate Metabolism	HMDB00943
N-formylmethionine	2829	919	-0.0036599	0.0150426	1	0.0965022	Amino Acid	Methionine, Cysteine, SAM and Taurine Metabolism	HMDB01015
1-methylhistidine	30460	916	-0.00309542	0.330462	1	0.594203	Amino Acid	Histidine Metabolism	HMDB00001
hypoxanthine	3127	919	-0.0127002	0.000893789	0.676598	0.0130115	Nucleotide	Purine Metabolism, (Hypo)Xanthine/Inosine containing	HMDB00157
betaine	3141	919	0.00207479	0.179605	1	0.416283	Amino Acid	Glycine, Serine and Threonine Metabolism	HMDB00043
xanthine	3147	919	-0.00861917	0.00179109	1	0.0214932	Nucleotide	Purine Metabolism, (Hypo)Xanthine/Inosine containing	HMDB00292
N-(2-furoyl)glycine	31536	684	-0.00157999	0.802149	1	0.911752	Xenobiotics	Food Component/Plant	HMDB00439
3-ureidopropionate	3155	833	0.00345027	0.150846	1	0.370748	Nucleotide	Pyrimidine Metabolism, Uracil containing	HMDB00026
pyridoxate	31555	919	0.00990219	0.0773931	1	0.256453	Cofactors and Vitamins	Vitamin B6 Metabolism	HMDB00017
androsterone sulfate	31591	916	-0.00191901	0.760034	1	0.893354	Lipid	Androgenic Steroids	HMDB02759
3-carboxy-4-methyl-5-propyl-2-furanpropanoate (CMPF)	31787	919	0.0513471	2.6744e-07	0.000202452	1.84048e-05	Lipid	Fatty Acid, Dicarboxylate	HMDB61112
7-ketodeoxycholate	31904	205	0.00305877	0.852567	1	0.944732	Lipid	Secondary Bile Acid Metabolism	HMDB00391
glycolithocholate	31912	663	0.000557505	0.940223	1	0.97851	Lipid	Secondary Bile Acid Metabolism	HMDB00698
propionylglycine	31932	837	0.011671	0.00420567	1	0.0413466	Lipid	Fatty Acid Metabolism (also BCAA Metabolism)	HMDB00783
5-hydroxyhexanoate	31938	675	-0.00363643	0.482592	1	0.720014	Lipid	Fatty Acid, Monohydroxy	HMDB00525
3-hydroxysebacate	31943	839	-0.00731269	0.185868	1	0.42023	Lipid	Fatty Acid, Monohydroxy	HMDB00350
3-(4-hydroxyphenyl)lactate	32197	919	-0.00191853	0.40237	1	0.670913	Amino Acid	Tyrosine Metabolism	HMDB00755
acetylcarnitine (C2)	32198	919	-0.00134232	0.538074	1	0.762008	Lipid	Fatty Acid Metabolism(Acyl Carnitine)	HMDB00201
trans-4-hydroxyproline	32306	919	-0.00886952	0.000931187	0.704909	0.0133002	Amino Acid	Urea cycle; Arginine and Proline Metabolism	HMDB00725
hexanoylcarnitine (C6)	32328	919	-0.00866641	0.0166726	1	0.100969	Lipid	Fatty Acid Metabolism(Acyl Carnitine)	HMDB00705
adenosine 5'-monophosphate (AMP)	32342	762	-0.0175717	0.00603724	1	0.053767	Nucleotide	Purine Metabolism, Adenine containing	HMDB00045
glycochenodeoxycholate	32346	914	-0.000430761	0.95284	1	0.97851	Lipid	Primary Bile Acid Metabolism	HMDB00637
1-methyl-4-imidazoleacetate	32350	919	-0.0042323	0.0740815	1	0.252611	Amino Acid	Histidine Metabolism	HMDB02820
N-acetylneuraminate	32377	919	-0.00578787	0.00537774	1	0.0490476	Carbohydrate	Aminosugar Metabolism	HMDB00230
dodecanedioate (C12-DC)	32388	908	-0.00676443	0.125698	1	0.334138	Lipid	Fatty Acid, Dicarboxylate	HMDB00623
N-acetyltyrosine	32390	833	-0.000117765	0.970589	1	0.982268	Amino Acid	Tyrosine Metabolism	HMDB00866
1,3-dimethylurate	32391	776	-5.21457e-05	0.993771	1	0.993771	Xenobiotics	Xanthine Metabolism	HMDB01857
3-hydroxy-2-ethylpropionate	32397	919	-0.00602087	0.00828993	1	0.0667604	Amino Acid	Leucine, Isoleucine and Valine Metabolism	HMDB00396
trigonelline (N'-methylnicotinate)	32401	919	0.03147	1.73145e-05	0.0131071	0.000689847	Cofactors and Vitamins	Nicotinate and Nicotinamide Metabolism	HMDB00875
indolepropionate	32405	912	0.0300751	6.51875e-08	4.93469e-05	6.98273e-06	Amino Acid	Tryptophan Metabolism	HMDB02302
butyrylcarnitine (C4)	32412	916	-0.00163381	0.614929	1	0.805482	Lipid	Fatty Acid Metabolism (also BCAA Metabolism)	HMDB02013
docosadienoate (22:2n6)	32415	919	0.00589939	0.0662596	1	0.235486	Lipid	Polyunsaturated Fatty Acid (n3 and n6)	HMDB61714
myristoleate (14:1n5)	32418	919	-0.00605707	0.14232	1	0.359122	Lipid	Long Chain Fatty Acid	HMDB02000
dehydroisoandrosterone sulfate (DHEA-S)	32425	918	0.00603257	0.204753	1	0.44927	Lipid	Androgenic Steroids	HMDB01032
I-urobilinogen	32426	339	0.00303251	0.798406	1	0.910231	Cofactors and Vitamins	Hemoglobin and Porphyrin Metabolism	HMDB04157
3-methylxanthine	32445	880	-0.0116967	0.0812887	1	0.26524	Xenobiotics	Xanthine Metabolism	HMDB01886
guanidinosuccinate	32446	593	-0.00389188	0.468945	1	0.717154	Amino Acid	Guanidino and Acetamido Metabolism	HMDB03157
propionylcarnitine (C3)	32452	919	0.00245936	0.257502	1	0.519811	Lipid	Fatty Acid Metabolism (also BCAA Metabolism)	HMDB00824
3-hydroxylaurate	32457	919	-0.000499894	0.898817	1	0.969237	Lipid	Fatty Acid, Monohydroxy	HMDB00387
caproate (6:0)	32489	915	-0.00350313	0.253508	1	0.514493	Lipid	Medium Chain Fatty Acid	HMDB00535
caprylate (8:0)	32492	830	-0.0067215	0.0710121	1	0.246539	Lipid	Medium Chain Fatty Acid	HMDB00482
10-undecenoate (11:1n1)	32497	919	-0.00588239	0.0652358	1	0.232941	Lipid	Medium Chain Fatty Acid	HMDB33724
docosapentaenoate (n3 DPA; 22:5n3)	32504	919	0.0144847	0.000421027	0.318718	0.00741204	Lipid	Polyunsaturated Fatty Acid (n3 and n6)	HMDB06528
2-linoleoylglycerol (18:2)	32506	540	-0.00169066	0.732923	1	0.880671	Lipid	Monoacylglycerol	HMDB11538
phenol sulfate	32553	919	0.00440692	0.421147	1	0.682673	Amino Acid	Tyrosine Metabolism	HMDB60015
pregnen-diol disulfate C21H34O8S2*	32562	919	-0.00122923	0.82098	1	0.920735	Lipid	Pregnenolone Steroids	NA
bilirubin (E,E)*	32586	919	0.000699479	0.854491	1	0.944732	Cofactors and Vitamins	Hemoglobin and Porphyrin Metabolism	NA
pregn steroid monosulfate C21H34O5S*	32619	919	0.00992008	0.0309848	1	0.151326	Lipid	Pregnenolone Steroids	NA
glycolithocholate sulfate*	32620	919	0.0127138	0.0531891	1	0.207353	Lipid	Secondary Bile Acid Metabolism	HMDB02639
taurocholenate sulfate	32807	919	-0.00774441	0.106126	1	0.313619	Lipid	Secondary Bile Acid Metabolism	NA
andro steroid monosulfate C19H28O6S (1)*	32827	771	-0.000327331	0.953593	1	0.97851	Lipid	Androgenic Steroids	HMDB02759
adrenate (22:4n6)	32980	903	0.00414625	0.277274	1	0.533108	Lipid	Polyunsaturated Fatty Acid (n3 and n6)	HMDB02226
homostachydrine*	33009	882	-0.00299505	0.528298	1	0.755996	Xenobiotics	Food Component/Plant	HMDB33433
2-hydroxyacetaminophen sulfate*	33173	322	-0.014462	0.589641	1	0.801362	Xenobiotics	Drug - Analgesics, Anesthetics	NA
1-arachidonoyl-GPC (20:4n6)*	33228	919	-0.00114256	0.636824	1	0.814318	Lipid	Lysophospholipid	HMDB10395
1-palmitoleoyl-GPC (16:1)*	33230	919	-0.00419822	0.0689812	1	0.24064	Lipid	Lysophospholipid	HMDB10383
gamma-glutamylthreonine	33364	919	-0.00220229	0.318725	1	0.579887	Peptide	Gamma-glutamyl Amino Acid	HMDB29159
salicyluric glucuronide*	33384	561	0.00953663	0.586017	1	0.800121	Xenobiotics	Drug - Analgesics, Anesthetics	NA
gamma-glutamylphenylalanine	33422	919	-0.00474891	0.0182547	1	0.104625	Peptide	Gamma-glutamyl Amino Acid	HMDB00594
isobutyrylcarnitine (C4)	33441	919	0.00660279	0.0773278	1	0.256453	Amino Acid	Leucine, Isoleucine and Valine Metabolism	HMDB00736
pseudouridine	33442	919	-0.00517311	0.00100896	0.763781	0.0141441	Nucleotide	Pyrimidine Metabolism, Uracil containing	HMDB00767
palmitoleate (16:1n7)	33447	919	0.000589786	0.897602	1	0.969237	Lipid	Long Chain Fatty Acid	HMDB03229
glutamate, gamma-methyl ester	33487	840	-0.00265378	0.289188	1	0.548573	Amino Acid	Glutamate Metabolism	HMDB61715
eicosenoate (20:1)	33587	919	0.00594842	0.104679	1	0.311977	Lipid	Long Chain Fatty Acid	HMDB02231
gamma-glutamyl-epsilon-lysine	33934	897	0.000114767	0.954509	1	0.97851	Peptide	Gamma-glutamyl Amino Acid	HMDB03869
piperine	33935	914	0.00775923	0.367757	1	0.637052	Xenobiotics	Food Component/Plant	HMDB29377
octanoylcarnitine (C8)	33936	919	-0.00981802	0.0196306	1	0.106188	Lipid	Fatty Acid Metabolism(Acyl Carnitine)	HMDB00791
alpha-hydroxyisovalerate	33937	919	-0.00352928	0.276502	1	0.533108	Amino Acid	Leucine, Isoleucine and Valine Metabolism	HMDB00407
N-acetylthreonine	33939	915	-0.00414742	0.0077385	1	0.0658208	Amino Acid	Glycine, Serine and Threonine Metabolism	NA
decanoylcarnitine (C10)	33941	919	-0.00997525	0.0197372	1	0.106188	Lipid	Fatty Acid Metabolism(Acyl Carnitine)	HMDB00651
N-acetylasparagine	33942	919	0.000745651	0.790192	1	0.903588	Amino Acid	Alanine and Aspartate Metabolism	HMDB06028
N-acetylglutamine	33943	910	-0.000187385	0.951681	1	0.97851	Amino Acid	Glutamate Metabolism	HMDB06029
N-acetylhistidine	33946	910	-0.000798134	0.783331	1	0.901034	Amino Acid	Histidine Metabolism	HMDB32055
gamma-glutamyltryptophan	33947	685	-0.00420096	0.120009	1	0.334138	Peptide	Gamma-glutamyl Amino Acid	HMDB29160
gamma-glutamylglycine	33949	919	0.00238994	0.260578	1	0.523229	Peptide	Gamma-glutamyl Amino Acid	HMDB11667
N-acetylphenylalanine	33950	906	-0.0069798	0.0119305	1	0.0828567	Amino Acid	Phenylalanine Metabolism	HMDB00512
myristoylcarnitine (C14)	33952	919	-0.0129065	1.01152e-05	0.00765724	0.000450426	Lipid	Fatty Acid Metabolism(Acyl Carnitine)	HMDB05066
N-acetylarginine	33953	919	0.000921756	0.740612	1	0.887094	Amino Acid	Urea cycle; Arginine and Proline Metabolism	HMDB04620
1-palmitoyl-GPC (16:0)	33955	919	5.2373e-05	0.968764	1	0.982268	Lipid	Lysophospholipid	HMDB10382
N-acetyltryptophan	33959	905	-0.00364592	0.232454	1	0.487362	Amino Acid	Tryptophan Metabolism	HMDB13713
1-stearoyl-GPC (18:0)	33961	919	0.000131812	0.928925	1	0.978019	Lipid	Lysophospholipid	HMDB10384
acetoacetate	33963	695	0.00387516	0.535236	1	0.760574	Lipid	Ketone Bodies	HMDB00060
N-acetylisoleucine	33967	870	-0.00543412	0.00875804	1	0.0683489	Amino Acid	Leucine, Isoleucine and Valine Metabolism	HMDB61684
5-dodecenoate (12:1n7)	33968	918	-0.00753318	0.0668958	1	0.236636	Lipid	Medium Chain Fatty Acid	HMDB00529
stearidonate (18:4n3)	33969	918	0.0221205	1.64452e-06	0.0012449	9.57618e-05	Lipid	Polyunsaturated Fatty Acid (n3 and n6)	HMDB06547
10-heptadecenoate (17:1n7)	33971	919	-0.00290567	0.452282	1	0.708856	Lipid	Long Chain Fatty Acid	HMDB60038
10-nonadecenoate (19:1n9)	33972	919	-0.00109011	0.764662	1	0.893354	Lipid	Long Chain Fatty Acid	HMDB13622
epiandrosterone sulfate	33973	914	0.00538522	0.382994	1	0.654461	Lipid	Androgenic Steroids	NA
tauro-beta-muricholate	33983	432	-0.00227897	0.825562	1	0.924483	Lipid	Primary Bile Acid Metabolism	HMDB00932
linolenate [alpha or gamma; (18:3n3 or 6)]	34035	919	0.0125801	0.00169172	1	0.0208541	Lipid	Polyunsaturated Fatty Acid (n3 and n6)	HMDB03073
1-arachidonoyl-GPI (20:4)*	34214	919	0.00263184	0.321245	1	0.581775	Lipid	Lysophospholipid	HMDB61690
stachydrine	34384	919	0.0205124	0.058837	1	0.221394	Xenobiotics	Food Component/Plant	HMDB04827
1-methylxanthine	34389	795	0.00426241	0.54093	1	0.762008	Xenobiotics	Xanthine Metabolism	HMDB10738
7-methylxanthine	34390	845	-0.011101	0.10838	1	0.31677	Xenobiotics	Xanthine Metabolism	HMDB01991
1-methylurate	34395	663	0.000572628	0.938726	1	0.97851	Xenobiotics	Xanthine Metabolism	HMDB03099
choline phosphate	34396	911	-0.000840375	0.746757	1	0.888829	Lipid	Phospholipid Metabolism	HMDB01565
1-arachidonylglycerol (20:4)	34397	725	0.0027067	0.535516	1	0.760574	Lipid	Monoacylglycerol	HMDB11549
3,7-dimethylurate	34399	747	-0.00558453	0.360696	1	0.630593	Xenobiotics	Xanthine Metabolism	HMDB01982
1,7-dimethylurate	34400	884	0.0076146	0.337587	1	0.60272	Xenobiotics	Xanthine Metabolism	HMDB11103
5-acetylamino-6-formylamino-3-methyluracil	34401	774	0.00011008	0.989735	1	0.9924	Xenobiotics	Xanthine Metabolism	HMDB11105
1,3,7-trimethylurate	34404	709	-0.00682359	0.409929	1	0.6746	Xenobiotics	Xanthine Metabolism	HMDB02123
isovalerylcarnitine (C5)	34407	919	0.00400716	0.180921	1	0.416283	Amino Acid	Leucine, Isoleucine and Valine Metabolism	HMDB00688
stearoylcarnitine (C18)	34409	919	-0.00938946	5.43088e-05	0.0411118	0.0016193	Lipid	Fatty Acid Metabolism(Acyl Carnitine)	HMDB00848
1-linoleoyl-GPC (18:2)	34419	919	0.00168111	0.381174	1	0.652826	Lipid	Lysophospholipid	HMDB10386
5-acetylamino-6-amino-3-methyluracil	34424	895	0.016354	0.0513779	1	0.201519	Xenobiotics	Xanthine Metabolism	HMDB04400
sphingosine 1-phosphate	34445	919	-0.00379421	0.0547579	1	0.210415	Lipid	Sphingolipid Metabolism	HMDB00277
gamma-glutamylisoleucine*	34457	910	-0.00637362	0.0103474	1	0.0749698	Peptide	Gamma-glutamyl Amino Acid	HMDB11170
laurylcarnitine (C12)	34534	919	-0.0119969	0.00159736	1	0.0204949	Lipid	Fatty Acid Metabolism(Acyl Carnitine)	HMDB02250
beta-guanidinopropanoate	35101	560	0.0108435	0.124398	1	0.334138	Xenobiotics	Food Component/Plant	HMDB13222
isovalerylglycine	35107	669	0.000494095	0.912282	1	0.972098	Amino Acid	Leucine, Isoleucine and Valine Metabolism	HMDB00678
7-methylguanine	35114	919	-0.00418272	0.00195369	1	0.022753	Nucleotide	Purine Metabolism, Guanine containing	HMDB00897
phenylacetylglutamine	35126	919	-0.00263403	0.542346	1	0.762008	Peptide	Acetylated Peptides	HMDB06344
pro-hydroxy-pro	35127	918	-0.0028177	0.311081	1	0.575766	Amino Acid	Urea cycle; Arginine and Proline Metabolism	HMDB06695
N4-acetylcytidine	35130	829	-0.0108544	0.00322283	1	0.0338844	Nucleotide	Pyrimidine Metabolism, Cytidine containing	HMDB05923
3-methylcytidine	35132	915	0.000110908	0.955146	1	0.97851	Nucleotide	Pyrimidine Metabolism, Cytidine containing	NA
5-methyluridine (ribothymidine)	35136	919	-0.000924642	0.611851	1	0.805482	Nucleotide	Pyrimidine Metabolism, Uracil containing	HMDB00884
N2,N2-dimethylguanosine	35137	919	-0.0046438	0.00341406	1	0.0354033	Nucleotide	Purine Metabolism, Guanine containing	HMDB04824
N6-carbamoylthreonyladenosine	35157	918	-0.00903567	1.07234e-05	0.00811762	0.000450979	Nucleotide	Purine Metabolism, Adenine containing	HMDB41623
cysteine-glutathione disulfide	35159	909	-0.00685915	0.121252	1	0.334138	Amino Acid	Glutathione Metabolism	HMDB00656
oleoylcarnitine (C18:1)	35160	919	-0.00322346	0.122235	1	0.334138	Lipid	Fatty Acid Metabolism(Acyl Carnitine)	HMDB05065
orotidine	35172	919	-0.00725139	0.0534132	1	0.207353	Nucleotide	Pyrimidine Metabolism, Orotate containing	HMDB00788
1-arachidonoyl-GPE (20:4n6)*	35186	919	-0.00524644	0.00802947	1	0.0660686	Lipid	Lysophospholipid	HMDB11517
2-palmitoyl-GPC (16:0)*	35253	919	0.0015032	0.458522	1	0.713903	Lipid	Lysophospholipid	HMDB61702
1-palmitoyl-GPI (16:0)	35305	875	0.00266986	0.580839	1	0.798757	Lipid	Lysophospholipid	HMDB61695
catechol sulfate	35320	919	0.0263918	7.37937e-08	5.58618e-05	6.98273e-06	Xenobiotics	Benzoate Metabolism	HMDB59724
hydroquinone sulfate	35322	684	-0.00818857	0.21944	1	0.467934	Xenobiotics	Drug - Topical Agents	HMDB02434
hexanoylglycine	35436	578	0.0026181	0.618782	1	0.805482	Lipid	Fatty Acid Metabolism(Acyl Glycine)	HMDB00701
4-hydroxyhippurate	35527	919	-0.00552967	0.29184	1	0.550342	Xenobiotics	Benzoate Metabolism	HMDB13678
1-oleoyl-GPE (18:1)	35628	919	-0.00489741	0.109473	1	0.318735	Lipid	Lysophospholipid	HMDB11506
1-palmitoyl-GPE (16:0)	35631	919	0.001025	0.662036	1	0.83377	Lipid	Lysophospholipid	HMDB11503
3-(3-hydroxyphenyl)propionate	35635	525	0.000918124	0.916937	1	0.972159	Xenobiotics	Benzoate Metabolism	HMDB00375
cysteinylglycine	35637	901	-0.00563298	0.163904	1	0.392644	Amino Acid	Glutathione Metabolism	HMDB00078
ectoine	35651	858	-0.000923528	0.894554	1	0.968781	Xenobiotics	Chemical	NA
tetradecanedioate (C14-DC)	35669	907	-0.00325151	0.437253	1	0.702761	Lipid	Fatty Acid, Dicarboxylate	HMDB00872
2-hydroxypalmitate	35675	919	0.00441571	0.0126968	1	0.0873769	Lipid	Fatty Acid, Monohydroxy	HMDB31057
hexadecanedioate (C16-DC)	35678	918	0.000454671	0.903959	1	0.969259	Lipid	Fatty Acid, Dicarboxylate	HMDB00672
dihomo-linolenate (20:3n3 or n6)	35718	919	0.00353858	0.188285	1	0.42281	Lipid	Polyunsaturated Fatty Acid (n3 and n6)	HMDB02925
thymol sulfate	36095	875	-0.00400846	0.759448	1	0.893354	Xenobiotics	Food Component/Plant	HMDB01878
4-vinylphenol sulfate	36098	918	0.00909213	0.24235	1	0.49721	Xenobiotics	Benzoate Metabolism	HMDB04072
4-ethylphenylsulfate	36099	918	0.011639	0.224488	1	0.474686	Xenobiotics	Benzoate Metabolism	NA
p-cresol sulfate	36103	919	-0.00360427	0.555752	1	0.774778	Xenobiotics	Benzoate Metabolism	HMDB11635
1-linoleoyl-GPI (18:2)*	36594	919	0.00583515	0.0629129	1	0.227871	Lipid	Lysophospholipid	NA
1-linoleoyl-GPE (18:2)*	36600	919	-0.00351541	0.183038	1	0.419186	Lipid	Lysophospholipid	HMDB11507
1-oleoyl-GPI (18:1)*	36602	898	0.00286504	0.523263	1	0.752095	Lipid	Lysophospholipid	NA
gamma-glutamylglutamate	36738	907	0.00282793	0.289867	1	0.548573	Peptide	Gamma-glutamyl Amino Acid	HMDB11737
2-hydroxy-3-methylvalerate	36746	919	-0.00776172	0.00916551	1	0.0700838	Amino Acid	Leucine, Isoleucine and Valine Metabolism	HMDB00317
deoxycarnitine	36747	919	-0.0041529	0.0042843	1	0.0415797	Lipid	Carnitine Metabolism	HMDB01161
N2-acetyllysine	36751	501	-0.00677597	0.307889	1	0.571255	Amino Acid	Lysine Metabolism	HMDB00446
N6-acetyllysine	36752	919	0.000240613	0.898742	1	0.969237	Amino Acid	Lysine Metabolism	HMDB00206
octadecanedioate (C18-DC)	36754	873	0.00251861	0.508477	1	0.744521	Lipid	Fatty Acid, Dicarboxylate	HMDB00782
7-alpha-hydroxy-3-oxo-4-cholestenoate (7-Hoca)	36776	919	-0.000380658	0.854591	1	0.944732	Lipid	Sterol	HMDB12458
dimethylarginine (SDMA + ADMA)	36808	919	0.00118214	0.451434	1	0.708856	Amino Acid	Urea cycle; Arginine and Proline Metabolism	HMDB01539
o-cresol sulfate	36845	573	-0.00596867	0.466749	1	0.715241	Xenobiotics	Benzoate Metabolism	NA
taurolithocholate 3-sulfate	36850	903	0.0143644	0.0405956	1	0.176614	Lipid	Secondary Bile Acid Metabolism	HMDB02580
succinylcarnitine (C4-DC)	37058	919	-0.00241492	0.23969	1	0.494402	Energy	TCA Cycle	HMDB61717
malonylcarnitine	37059	719	0.00183961	0.582449	1	0.798757	Lipid	Fatty Acid Synthesis	HMDB02095
gamma-glutamylalanine	37063	913	-0.00101774	0.78482	1	0.901034	Peptide	Gamma-glutamyl Amino Acid	HMDB29142
N-acetylserine	37076	919	-0.0024951	0.102496	1	0.309122	Amino Acid	Glycine, Serine and Threonine Metabolism	HMDB02931
tryptophan betaine	37097	918	0.0234195	0.00257376	1	0.028652	Amino Acid	Tryptophan Metabolism	HMDB61115
chiro-inositol	37112	345	-0.0258602	0.0352939	1	0.163911	Lipid	Inositol Metabolism	HMDB34220
4-allylphenol sulfate	37181	914	0.0282168	0.000133402	0.100985	0.00336617	Xenobiotics	Food Component/Plant	NA
5alpha-androstan-3alpha,17alpha-diol monosulfate	37183	360	0.0044434	0.523585	1	0.752095	Lipid	Androgenic Steroids	NA
5alpha-androstan-3alpha,17beta-diol disulfate	37184	396	-0.00222625	0.820999	1	0.920735	Lipid	Androgenic Steroids	NA
5alpha-androstan-3alpha,17beta-diol monosulfate (2)	37185	268	0.0193762	0.0797224	1	0.261255	Lipid	Androgenic Steroids	NA
5alpha-androstan-3alpha,17beta-diol monosulfate (1)	37186	763	-0.00874361	0.14702	1	0.366098	Lipid	Androgenic Steroids	NA
5alpha-androstan-3beta,17alpha-diol disulfate	37187	695	0.0125538	0.136985	1	0.350329	Lipid	Androgenic Steroids	NA
5alpha-androstan-3beta,17beta-diol disulfate	37190	909	-0.00475066	0.512673	1	0.747274	Lipid	Androgenic Steroids	HMDB00493
5alpha-androstan-3beta,17beta-diol monosulfate (2)	37192	669	-0.0114392	0.0607927	1	0.223398	Lipid	Androgenic Steroids	NA
5alpha-pregnan-3beta,20beta-diol monosulfate (1)	37196	812	-0.00115395	0.842966	1	0.938419	Lipid	Progestin Steroids	NA
5alpha-pregnan-3beta,20alpha-diol disulfate	37198	911	-0.00685908	0.313566	1	0.578589	Lipid	Progestin Steroids	NA
5alpha-pregnan-3beta,20alpha-diol monosulfate (2)	37200	880	0.00553058	0.359564	1	0.63007	Lipid	Progestin Steroids	NA
androstenediol (3beta,17beta) disulfate (1)	37202	918	0.000505303	0.931408	1	0.97851	Lipid	Androgenic Steroids	HMDB03818
androstenediol (3beta,17beta) disulfate (2)	37203	917	-0.000473797	0.924943	1	0.977907	Lipid	Androgenic Steroids	HMDB03818
androstenediol (3alpha, 17alpha) monosulfate (2)	37207	812	0.00335905	0.440314	1	0.704689	Lipid	Androgenic Steroids	NA
androstenediol (3alpha, 17alpha) monosulfate (3)	37209	905	0.00229862	0.614037	1	0.805482	Lipid	Androgenic Steroids	NA
androstenediol (3beta,17beta) monosulfate (2)	37210	870	-0.00157987	0.778511	1	0.901034	Lipid	Androgenic Steroids	NA
androstenediol (3beta,17beta) monosulfate (1)	37211	912	0.00634709	0.256214	1	0.518593	Lipid	Androgenic Steroids	HMDB03818
2-hydroxyglutarate	37253	905	0.00392729	0.148246	1	0.367943	Lipid	Fatty Acid, Dicarboxylate	HMDB00606
N-methylproline	37431	919	0.00328834	0.699771	1	0.858552	Amino Acid	Urea cycle; Arginine and Proline Metabolism	NA
N-acetyl-beta-alanine	37432	906	0.00206784	0.295048	1	0.552635	Nucleotide	Pyrimidine Metabolism, Uracil containing	NA
cysteine sulfinic acid	37443	604	0.00634379	0.0460417	1	0.188873	Amino Acid	Methionine, Cysteine, SAM and Taurine Metabolism	HMDB00996
4-hydroxycoumarin	37445	724	0.0244139	0.00217506	1	0.024575	Xenobiotics	Drug - Cardiovascular	NA
glycerophosphoethanolamine	37455	919	-0.000308828	0.955243	1	0.97851	Lipid	Phospholipid Metabolism	HMDB00114
ergothioneine	37459	918	0.0152	0.000217785	0.164864	0.00446475	Xenobiotics	Food Component/Plant	HMDB03045
4-acetaminophen sulfate	37475	397	-0.0221866	0.450386	1	0.708856	Xenobiotics	Drug - Analgesics, Anesthetics	HMDB59911
docosapentaenoate (n6 DPA; 22:5n6)	37478	851	-0.00149771	0.63176	1	0.809209	Lipid	Polyunsaturated Fatty Acid (n3 and n6)	HMDB01976
17alpha-hydroxypregnenolone 3-sulfate	37482	199	0.0046514	0.626762	1	0.809209	Lipid	Pregnenolone Steroids	HMDB00416
N-acetylputrescine	37496	919	-0.00212432	0.277109	1	0.533108	Amino Acid	Polyamine Metabolism	HMDB02064
palmitoyl sphingomyelin (d18:1/16:0)	37506	919	0.00140376	0.146996	1	0.366098	Lipid	Sphingolipid Metabolism	NA
sphingomyelin (d18:1/18:1, d18:2/18:0)	37529	919	-0.00104294	0.494436	1	0.730206	Lipid	Sphingolipid Metabolism	HMDB12101
13-HODE + 9-HODE	37752	905	0.00303229	0.404915	1	0.672322	Lipid	Fatty Acid, Monohydroxy	NA
betonicine	38100	642	0.0188169	0.154249	1	0.377886	Xenobiotics	Food Component/Plant	HMDB29412
oleoyl ethanolamide	38102	911	0.00328391	0.275867	1	0.533108	Lipid	Endocannabinoid	HMDB02088
indole-3-carboxylic acid	38116	784	0.00188803	0.544579	1	0.762008	Amino Acid	Tryptophan Metabolism	HMDB03320
4-cholesten-3-one	38125	787	-0.00683933	0.0164389	1	0.100969	Lipid	Sterol	HMDB00921
S-methylmethionine	38127	540	0.0296762	0.00167649	1	0.0208541	Amino Acid	Methionine, Cysteine, SAM and Taurine Metabolism	HMDB38670
palmitoyl ethanolamide	38165	919	-8.13376e-05	0.964218	1	0.981066	Lipid	Endocannabinoid	HMDB02100
16a-hydroxy DHEA 3-sulfate	38168	915	0.00455852	0.475099	1	0.720008	Lipid	Androgenic Steroids	NA
pregnenolone sulfate	38170	852	0.0127294	0.0139069	1	0.0918612	Lipid	Pregnenolone Steroids	HMDB00774
cis-4-decenoylcarnitine (C10:1)	38178	919	-0.00610321	0.0833083	1	0.267222	Lipid	Fatty Acid Metabolism(Acyl Carnitine)	NA
2,3-dihydroxyisovalerate	38276	913	0.0241731	0.00798625	1	0.0660686	Xenobiotics	Food Component/Plant	HMDB12141
17-methylstearate (i19:0)	38296	919	-0.00365288	0.180901	1	0.416283	Lipid	Fatty Acid, Branched	HMDB37397
12,13-DiHOME	38395	692	0.0109449	0.00741294	1	0.0639728	Lipid	Fatty Acid, Dihydroxy	HMDB04705
9,10-DiHOME	38399	554	-0.000485425	0.914311	1	0.972098	Lipid	Fatty Acid, Dihydroxy	HMDB04704
stearoyl ethanolamide	38625	919	-0.00199131	0.445901	1	0.708126	Lipid	Endocannabinoid	HMDB13078
cinnamoylglycine	38637	853	0.04645	1.33355e-06	0.0010095	8.41249e-05	Xenobiotics	Food Component/Plant	HMDB11621
15-methylpalmitate (i17:0)	38768	884	-0.00567209	0.0747719	1	0.253822	Lipid	Fatty Acid, Branched	NA
1-(1-enyl-palmitoyl)-GPE (P-16:0)*	39270	919	0.00147575	0.570023	1	0.789135	Lipid	Lysoplasmalogen	NA
1-(1-enyl-stearoyl)-GPE (P-18:0)*	39271	919	-0.0041102	0.306133	1	0.569392	Lipid	Lysoplasmalogen	NA
alpha-CEHC glucuronide*	39346	431	-0.00901952	0.463812	1	0.715079	Cofactors and Vitamins	Tocopherol Metabolism	NA
tauroursodeoxycholate	39378	279	-0.0397153	0.00157336	1	0.0204949	Lipid	Secondary Bile Acid Metabolism	HMDB00874
glycoursodeoxycholate	39379	914	-0.0129938	0.128187	1	0.334612	Lipid	Secondary Bile Acid Metabolism	HMDB00708
S-methylcysteine	39592	919	0.0130824	0.00018167	0.137524	0.00408497	Amino Acid	Methionine, Cysteine, SAM and Taurine Metabolism	HMDB02108
7-methylurate	39598	749	-0.00197756	0.71719	1	0.870053	Xenobiotics	Xanthine Metabolism	HMDB11107
glutarate (C5-DC)	396	866	-0.0106872	0.0398514	1	0.175392	Lipid	Fatty Acid, Dicarboxylate	HMDB00661
3-hydroxyhippurate	39600	916	0.0171099	0.0497888	1	0.196303	Xenobiotics	Benzoate Metabolism	HMDB06116
ethyl glucuronide	39603	349	0.00586984	0.669324	1	0.836103	Xenobiotics	Chemical	HMDB10325
16-hydroxypalmitate	39609	919	-0.00234583	0.406687	1	0.672322	Lipid	Fatty Acid, Monohydroxy	HMDB06294
N-oleoyltaurine	39732	717	0.009659	0.0171215	1	0.101809	Lipid	Endocannabinoid	NA
solanidine	39788	321	-0.0205733	0.125757	1	0.334138	Xenobiotics	Food Component/Plant	HMDB03236
glycyrrhetinate	39789	190	0.00237594	0.860562	1	0.946868	Xenobiotics	Food Component/Plant	HMDB11628
eicosanodioate (C20-DC)	39831	919	-0.00235632	0.5063	1	0.742769	Lipid	Fatty Acid, Dicarboxylate	NA
docosadioate (C22-DC)	39837	917	0.00061024	0.864262	1	0.948183	Lipid	Fatty Acid, Dicarboxylate	NA
carboxyethyl-GABA	40007	906	0.00342685	0.138894	1	0.354017	Amino Acid	Glutamate Metabolism	HMDB02201
4-hydroxy-2-oxoglutaric acid	40062	895	-0.00274888	0.586848	1	0.800121	Lipid	Fatty Acid, Dicarboxylate	HMDB02070
L-urobilin	40173	400	-0.0179499	0.127184	1	0.334138	Cofactors and Vitamins	Hemoglobin and Porphyrin Metabolism	HMDB04159
trimethylamine N-oxide	40406	919	0.000214125	0.96286	1	0.981066	Lipid	Phospholipid Metabolism	HMDB00925
N1-Methyl-2-pyridone-5-carboxamide	40469	919	0.00535519	0.125264	1	0.334138	Cofactors and Vitamins	Nicotinate and Nicotinamide Metabolism	HMDB04193
hydantoin-5-propionic acid	40473	914	-0.0034969	0.379779	1	0.652826	Amino Acid	Histidine Metabolism	HMDB01212
2-oxindole-3-acetate	40479	574	0.0203806	0.00395337	1	0.0399027	Xenobiotics	Food Component/Plant	HMDB35514
dihydroferulic acid	40481	345	-0.00655085	0.45742	1	0.713903	Xenobiotics	Food Component/Plant	NA
prolylglycine	40703	841	-0.00258562	0.477469	1	0.720008	Peptide	Dipeptide	HMDB11178
pregnanediol-3-glucuronide	40708	870	0.00597986	0.283172	1	0.541316	Lipid	Progestin Steroids	HMDB10318
imidazole propionate	40730	902	-0.00445679	0.323418	1	0.584313	Amino Acid	Histidine Metabolism	HMDB02271
2-stearoyl-GPE (18:0)*	41220	919	0.000834245	0.750151	1	0.890069	Lipid	Lysophospholipid	HMDB11129
alliin	41494	652	0.0376709	0.000344254	0.2606	0.00629712	Xenobiotics	Food Component/Plant	HMDB33592
heme	41754	814	-0.00922702	0.126933	1	0.334138	Cofactors and Vitamins	Hemoglobin and Porphyrin Metabolism	HMDB03178
succinimide	41888	902	-0.000874071	0.741799	1	0.887111	Xenobiotics	Chemical	NA
lanthionine	42002	642	0.00808899	0.107927	1	0.31667	Xenobiotics	Chemical	NA
indoleacetylglutamine	42087	740	-0.0029556	0.617959	1	0.805482	Amino Acid	Tryptophan Metabolism	HMDB13240
N-palmitoylglycine	42092	917	0.00304291	0.213897	1	0.459738	Lipid	Fatty Acid Metabolism(Acyl Glycine)	HMDB13034
phosphate	42109	919	0.00149484	0.419067	1	0.680759	Energy	Oxidative Phosphorylation	HMDB01429
S-1-pyrroline-5-carboxylate	42370	918	0.00289798	0.1945	1	0.434325	Amino Acid	Glutamate Metabolism	HMDB01301
2-aminobutyrate	42374	919	0.00357951	0.0877383	1	0.277899	Amino Acid	Glutathione Metabolism	HMDB00650
gamma-CEHC glucuronide*	42381	798	-0.000651958	0.902915	1	0.969259	Cofactors and Vitamins	Tocopherol Metabolism	NA
S-adenosylhomocysteine (SAH)	42382	669	-0.00976265	0.00210905	1	0.0241902	Amino Acid	Methionine, Cysteine, SAM and Taurine Metabolism	HMDB00939
1-stearoyl-GPE (18:0)	42398	919	-0.00119775	0.599475	1	0.805482	Lipid	Lysophospholipid	HMDB11130
erythronate*	42420	919	-0.00176991	0.198005	1	0.439158	Carbohydrate	Aminosugar Metabolism	HMDB00613
1-palmitoyl-2-linoleoyl-GPC (16:0/18:2)	42446	919	0.00158053	0.123295	1	0.334138	Lipid	Phosphatidylcholine (PC)	HMDB07973
1-stearoyl-2-oleoyl-GPE (18:0/18:1)	42448	919	-0.00352693	0.341565	1	0.606959	Lipid	Phosphatidylethanolamine (PE)	HMDB08993
1-palmitoyl-2-linoleoyl-GPE (16:0/18:2)	42449	919	-0.0021283	0.543945	1	0.762008	Lipid	Phosphatidylethanolamine (PE)	HMDB05322
1-stearoyl-2-arachidonoyl-GPC (18:0/20:4)	42450	919	-0.000668536	0.616928	1	0.805482	Lipid	Phosphatidylcholine (PC)	HMDB08048
sphingomyelin (d18:2/16:0, d18:1/16:1)*	42459	919	-0.000975872	0.426888	1	0.689028	Lipid	Sphingolipid Metabolism	NA
sphingomyelin (d18:1/14:0, d16:1/16:0)*	42463	919	-0.00142267	0.315355	1	0.579427	Lipid	Sphingolipid Metabolism	HMDB12097
2-hydroxydecanoate	42489	919	0.00276322	0.398681	1	0.667703	Lipid	Fatty Acid, Monohydroxy	NA
glycohyocholate	42574	668	-0.00660516	0.334241	1	0.599574	Lipid	Secondary Bile Acid Metabolism	NA
N-methyltaurine	42989	515	0.0185058	0.0685793	1	0.240345	Amino Acid	Methionine, Cysteine, SAM and Taurine Metabolism	NA
6-oxopiperidine-2-carboxylate	43231	802	-0.00267152	0.451336	1	0.708856	Amino Acid	Lysine Metabolism	HMDB61705
S-allylcysteine	43239	787	0.0221534	0.0291673	1	0.145261	Xenobiotics	Food Component/Plant	HMDB34323
N-delta-acetylornithine	43249	919	0.011976	0.00181712	1	0.0214932	Amino Acid	Urea cycle; Arginine and Proline Metabolism	NA
N-acetyl-1-methylhistidine*	43255	904	-0.0103513	0.0464289	1	0.188873	Amino Acid	Histidine Metabolism	NA
N-acetyl-3-methylhistidine*	43256	685	0.0144309	0.0589721	1	0.221394	Amino Acid	Histidine Metabolism	NA
acisoga	43258	763	0.0013214	0.745237	1	0.888416	Amino Acid	Polyamine Metabolism	NA
3-hydroxybutyrylcarnitine (1)	43264	748	-0.0046124	0.459101	1	0.713903	Lipid	Fatty Acid Metabolism(Acyl Carnitine)	HMDB13127
2-aminophenol sulfate	43266	905	0.0157225	0.0441708	1	0.183801	Xenobiotics	Chemical	HMDB61116
2-aminooctanoate	43343	919	-0.00262765	0.5207	1	0.752095	Lipid	Fatty Acid, Amino	HMDB00991
indolin-2-one	43374	803	-0.00254108	0.57022	1	0.789135	Xenobiotics	Food Component/Plant	NA
S-methylcysteine sulfoxide	43378	919	0.027224	8.96057e-09	6.78315e-06	2.26105e-06	Amino Acid	Methionine, Cysteine, SAM and Taurine Metabolism	HMDB29432
2-piperidinone	43400	919	-0.0120335	0.076817	1	0.256453	Xenobiotics	Food Component/Plant	HMDB11749
dimethyl sulfone	43424	870	0.0114596	0.126672	1	0.334138	Xenobiotics	Chemical	HMDB04983
N-acetylcarnosine	43488	919	-0.00336231	0.264392	1	0.526697	Amino Acid	Histidine Metabolism	HMDB12881
formiminoglutamate	43493	875	-0.00219846	0.472182	1	0.717754	Amino Acid	Histidine Metabolism	HMDB00854
3b-hydroxy-5-cholenoic acid	43507	469	0.0134334	0.00945174	1	0.0708412	Lipid	Secondary Bile Acid Metabolism	HMDB00308
N-formylanthranilic acid	43549	796	-0.00650057	0.0490192	1	0.194712	Amino Acid	Tryptophan Metabolism	HMDB04089
5-(galactosylhydroxy)-L-lysine	43582	917	-0.00629788	0.00743673	1	0.0639728	Amino Acid	Lysine Metabolism	NA
N2,N5-diacetylornithine	43591	870	0.00332955	0.442628	1	0.706898	Amino Acid	Urea cycle; Arginine and Proline Metabolism	NA
2-aminoheptanoate	43761	917	-0.00173918	0.62163	1	0.805482	Lipid	Fatty Acid, Amino	NA
guanidinoacetate	43802	919	0.00211859	0.296962	1	0.553695	Amino Acid	Creatine Metabolism	HMDB00128
bilirubin (Z,Z)	43807	919	-0.000341279	0.89131	1	0.96665	Cofactors and Vitamins	Hemoglobin and Porphyrin Metabolism	HMDB00054
gamma-glutamylvaline	43829	917	-0.00476133	0.0793795	1	0.261255	Peptide	Gamma-glutamyl Amino Acid	HMDB11172
glycerol 3-phosphate	43847	896	0.000210937	0.935587	1	0.97851	Lipid	Glycerolipid Metabolism	HMDB00126
aspartate	443	919	-0.00515412	0.0139765	1	0.0918612	Amino Acid	Alanine and Aspartate Metabolism	HMDB00191
3-methyl-2-oxobutyrate	44526	919	0.00110828	0.439364	1	0.704658	Amino Acid	Leucine, Isoleucine and Valine Metabolism	HMDB00019
3-methoxytyramine sulfate	44618	360	0.00150823	0.782624	1	0.901034	Amino Acid	Tyrosine Metabolism	NA
4-acetylphenol sulfate	44620	450	0.00236336	0.812034	1	0.914746	Xenobiotics	Drug - Other	NA
1-(1-enyl-oleoyl)-GPE (P-18:1)*	44621	889	0.000535018	0.889892	1	0.966496	Lipid	Lysoplasmalogen	NA
isovalerate (i5:0)	44656	903	0.00624718	0.0599752	1	0.223398	Amino Acid	Leucine, Isoleucine and Valine Metabolism	HMDB00718
glutarylcarnitine (C5-DC)	44664	915	-0.00668911	0.0200868	1	0.107082	Amino Acid	Lysine Metabolism	HMDB13130
docosahexaenoate (DHA; 22:6n3)	44675	919	0.0227506	3.14382e-08	2.37988e-05	4.75975e-06	Lipid	Polyunsaturated Fatty Acid (n3 and n6)	HMDB02183
palmitoylcarnitine (C16)	44681	919	-0.00582811	0.0031896	1	0.0338844	Lipid	Fatty Acid Metabolism(Acyl Carnitine)	HMDB00222
maltotriose	44688	268	-0.0206342	0.167856	1	0.397085	Carbohydrate	Glycogen Metabolism	HMDB01262
gamma-glutamylmethionine	44872	919	-0.000493023	0.767081	1	0.893354	Peptide	Gamma-glutamyl Amino Acid	HMDB29155
gamma-CEHC	44876	919	-0.00363931	0.425322	1	0.687968	Cofactors and Vitamins	Tocopherol Metabolism	HMDB01931
N-palmitoyl-sphingosine (d18:1/16:0)	44877	919	-0.00291039	0.101961	1	0.308738	Lipid	Ceramides	HMDB04949
methionine sulfone	44878	919	0.000254693	0.928461	1	0.978019	Amino Acid	Methionine, Cysteine, SAM and Taurine Metabolism	NA
2-methylbutyrylcarnitine (C5)	45095	889	-0.00648968	0.0162018	1	0.100531	Amino Acid	Leucine, Isoleucine and Valine Metabolism	HMDB00378
N-acetylalliin	45404	691	0.0186655	0.0427918	1	0.181985	Xenobiotics	Food Component/Plant	NA
O-sulfo-L-tyrosine	45413	919	-0.00388663	0.0910847	1	0.28375	Xenobiotics	Chemical	NA
3-(3-hydroxyphenyl)propionate sulfate	45415	642	0.0213942	0.00846397	1	0.0670949	Xenobiotics	Benzoate Metabolism	NA
1-linolenoyl-GPC (18:3)*	45951	919	0.00201583	0.608713	1	0.805482	Lipid	Lysophospholipid	HMDB10388
1-oleoyl-GPG (18:1)*	45968	559	0.00743496	0.101085	1	0.307314	Lipid	Lysophospholipid	NA
guaiacol sulfate	46111	919	0.0178889	0.000448253	0.339327	0.00744608	Xenobiotics	Benzoate Metabolism	HMDB60013
21-hydroxypregnenolone disulfate	46115	911	-0.000907717	0.846245	1	0.940686	Lipid	Pregnenolone Steroids	NA
mannitol/sorbitol	46142	919	0.0118788	0.0645527	1	0.231594	Carbohydrate	Fructose, Mannose and Galactose Metabolism	HMDB00247
methyl glucopyranoside (alpha + beta)	46144	836	0.0271229	7.2303e-05	0.0547333	0.00202716	Xenobiotics	Food Component/Plant	NA
4-methylcatechol sulfate	46146	919	0.00879699	0.156038	1	0.381035	Xenobiotics	Benzoate Metabolism	NA
3-methyl catechol sulfate (1)	46165	894	0.0202016	0.00720291	1	0.0634023	Xenobiotics	Benzoate Metabolism	NA
5alpha-pregnan-3(alpha or beta),20beta-diol disulfate	46172	390	-0.00570791	0.544262	1	0.762008	Lipid	Progestin Steroids	NA
aconitate [cis or trans]	46173	919	-0.00461401	0.00145371	1	0.0193063	Energy	TCA Cycle	NA
linoleoylcarnitine (C18:2)*	46223	919	0.00133646	0.543559	1	0.762008	Lipid	Fatty Acid Metabolism(Acyl Carnitine)	HMDB06469
pyroglutamine*	46225	919	-0.00802263	0.0255934	1	0.130907	Amino Acid	Glutamate Metabolism	NA
N-acetylglucosamine/N-acetylgalactosamine	46539	636	-0.00671527	0.0380344	1	0.171328	Carbohydrate	Aminosugar Metabolism	HMDB00215
3-methylglutarylcarnitine (2)	46548	917	-0.00292633	0.553019	1	0.772391	Amino Acid	Leucine, Isoleucine and Valine Metabolism	HMDB00552
oleoyl-linoleoyl-glycerol (18:1/18:2) [1]	46798	919	-0.00170225	0.641317	1	0.817113	Lipid	Diacylglycerol	HMDB07219
oleoyl-linoleoyl-glycerol (18:1/18:2) [2]	46799	919	-0.00127693	0.725115	1	0.876856	Lipid	Diacylglycerol	HMDB07219
gulonate*	46957	916	-0.00712999	0.00307647	1	0.0332698	Cofactors and Vitamins	Ascorbate and Aldarate Metabolism	HMDB03290
sulfate*	46960	919	0.00166625	0.184333	1	0.419186	Xenobiotics	Chemical	HMDB01448
N-methylpipecolate	47101	862	0.00298003	0.593025	1	0.804115	Xenobiotics	Bacterial/Fungal	NA
etiocholanolone glucuronide	47112	862	0.00743067	0.163156	1	0.392644	Lipid	Androgenic Steroids	HMDB04484
ferulic acid 4-sulfate	47114	186	-0.019197	0.198404	1	0.439158	Xenobiotics	Food Component/Plant	HMDB29200
9-hydroxystearate	47120	887	-0.00577774	0.10447	1	0.311977	Lipid	Fatty Acid, Monohydroxy	HMDB61661
5alpha-androstan-3alpha,17beta-diol 17-glucuronide	47132	282	-0.0195799	0.0185104	1	0.104625	Lipid	Androgenic Steroids	NA
11-ketoetiocholanolone glucuronide	47135	665	0.00403624	0.448253	1	0.708409	Lipid	Androgenic Steroids	NA
N-acetyl-S-allyl-L-cysteine	47136	213	0.010976	0.365321	1	0.635742	Xenobiotics	Food Component/Plant	NA
sphingomyelin (d18:1/24:1, d18:2/24:0)*	47153	919	0.00626236	0.000543638	0.411534	0.00839865	Lipid	Sphingolipid Metabolism	HMDB12107
sphingomyelin (d18:2/14:0, d18:1/14:1)*	47154	919	0.000872188	0.710312	1	0.867268	Lipid	Sphingolipid Metabolism	NA
alpha-CEHC sulfate	47666	557	-0.00740246	0.416646	1	0.679744	Cofactors and Vitamins	Tocopherol Metabolism	NA
bilirubin (E,Z or Z,E)*	47886	919	0.00158435	0.567651	1	0.788463	Cofactors and Vitamins	Hemoglobin and Porphyrin Metabolism	HMDB00488
1-methylguanidine	48114	388	-0.00427117	0.412868	1	0.676857	Amino Acid	Guanidino and Acetamido Metabolism	HMDB01522
N6-succinyladenosine	48130	663	-0.00523556	0.13526	1	0.347092	Nucleotide	Purine Metabolism, Adenine containing	HMDB00912
N-acetylglucosaminylasparagine	48149	847	-0.00423901	0.129444	1	0.336733	Carbohydrate	Aminosugar Metabolism	HMDB00489
glucose	48152	919	0.000674121	0.44812	1	0.708409	Carbohydrate	Glycolysis, Gluconeogenesis, and Pyruvate Metabolism	HMDB00122
mannose	48153	919	-2.02292e-05	0.989778	1	0.9924	Carbohydrate	Fructose, Mannose and Galactose Metabolism	HMDB00169
myristoleoylcarnitine (C14:1)*	48182	919	-0.0094867	0.0174838	1	0.101809	Lipid	Fatty Acid Metabolism(Acyl Carnitine)	NA
N-acetyltaurine	48187	894	-0.0062785	0.0762889	1	0.256453	Amino Acid	Methionine, Cysteine, SAM and Taurine Metabolism	NA
fructose	48195	919	0.00150761	0.622258	1	0.805482	Carbohydrate	Fructose, Mannose and Galactose Metabolism	HMDB00660
arabonate/xylonate	48255	919	0.00441702	0.061962	1	0.226595	Carbohydrate	Pentose Metabolism	NA
1-oleoyl-GPC (18:1)	48258	919	-0.00131313	0.446204	1	0.708126	Lipid	Lysophospholipid	HMDB02815
N1-methylinosine	48351	915	-0.00437687	0.0727001	1	0.249022	Nucleotide	Purine Metabolism, (Hypo)Xanthine/Inosine containing	HMDB02721
pregnanolone/allopregnanolone sulfate	48394	200	-0.0359315	0.0172451	1	0.101809	Lipid	Progestin Steroids	NA
dimethyl sulfoxide (DMSO)	48404	857	0.0127715	0.000218224	0.165196	0.00446475	Xenobiotics	Chemical	HMDB02151
dopamine 3-O-sulfate	48407	918	0.0048841	0.188506	1	0.42281	Amino Acid	Tyrosine Metabolism	HMDB06275
tyramine O-sulfate	48408	775	-0.0194491	0.00888974	1	0.0686687	Amino Acid	Tyrosine Metabolism	HMDB06409
phenylacetylcarnitine	48425	802	-0.000148047	0.981022	1	0.98886	Peptide	Acetylated Peptides	NA
pyrraline	48428	817	0.00433904	0.380694	1	0.652826	Xenobiotics	Food Component/Plant	HMDB33143
methyl-4-hydroxybenzoate sulfate	48429	888	0.000505077	0.968721	1	0.982268	Xenobiotics	Benzoate Metabolism	NA
N-formylphenylalanine	48433	681	0.000524934	0.87753	1	0.95719	Amino Acid	Tyrosine Metabolism	NA
N-acetylcitrulline	48434	717	-0.0119031	0.0479549	1	0.193095	Amino Acid	Urea cycle; Arginine and Proline Metabolism	HMDB00856
4-hydroxychlorothalonil	48441	919	0.00773525	0.0384752	1	0.171328	Xenobiotics	Chemical	NA
4-vinylguaiacol sulfate	48442	238	-0.0248188	0.124121	1	0.334138	Xenobiotics	Food Component/Plant	NA
3-hydroxypyridine sulfate	48448	910	0.0298748	0.000633203	0.479335	0.00958669	Xenobiotics	Chemical	NA
propyl 4-hydroxybenzoate sulfate	48460	496	-0.000369978	0.977602	1	0.988034	Xenobiotics	Benzoate Metabolism	NA
sphingomyelin (d18:1/20:0, d16:1/22:0)*	48490	919	0.00264968	0.0485578	1	0.194488	Lipid	Sphingolipid Metabolism	HMDB12102
sphingomyelin (d18:1/20:1, d18:2/20:0)*	48491	919	0.00212354	0.160089	1	0.387181	Lipid	Sphingolipid Metabolism	NA
behenoyl sphingomyelin (d18:1/22:0)*	48492	919	0.000974257	0.51888	1	0.752095	Lipid	Sphingolipid Metabolism	HMDB12103
sphingomyelin (d18:1/22:1, d18:2/22:0, d16:1/24:1)*	48493	919	0.0032229	0.0103987	1	0.0749698	Lipid	Sphingolipid Metabolism	HMDB12104
acesulfame	48569	451	0.00686906	0.736553	1	0.88363	Xenobiotics	Food Component/Plant	HMDB33585
2-acetamidophenol sulfate	48580	466	-0.00394055	0.65709	1	0.830413	Xenobiotics	Drug - Analgesics, Anesthetics	NA
umbelliferone sulfate	48674	469	0.00161713	0.888092	1	0.965928	Xenobiotics	Food Component/Plant	NA
3-acetylphenol sulfate	48693	346	-0.0114406	0.201809	1	0.444098	Xenobiotics	Chemical	NA
6-hydroxyindole sulfate	48698	918	-0.0060964	0.140032	1	0.354528	Xenobiotics	Chemical	NA
eugenol sulfate	48715	679	0.00246168	0.808312	1	0.913117	Xenobiotics	Food Component/Plant	NA
N-acetylkynurenine (2)	48757	587	-0.00494084	0.389696	1	0.664414	Amino Acid	Tryptophan Metabolism	NA
1,2,3-benzenetriol sulfate (2)	48762	565	0.0213524	0.114028	1	0.328211	Xenobiotics	Chemical	NA
3-methoxycatechol sulfate (1)	48763	746	0.00730218	0.464183	1	0.715079	Xenobiotics	Benzoate Metabolism	NA
C-glycosyltryptophan	48782	919	-0.00636645	0.00140652	1	0.0190131	Amino Acid	Tryptophan Metabolism	NA
p-cresol-glucuronide*	48841	898	-0.0129002	0.126593	1	0.334138	Amino Acid	Tyrosine Metabolism	HMDB11686
arabitol/xylitol	48885	919	-0.000611253	0.744394	1	0.888416	Carbohydrate	Pentose Metabolism	NA
pyruvate	48990	919	-0.00197795	0.223873	1	0.474686	Carbohydrate	Glycolysis, Gluconeogenesis, and Pyruvate Metabolism	HMDB00243
isoeugenol sulfate	48997	243	-0.000760085	0.951735	1	0.97851	Xenobiotics	Food Component/Plant	NA
1-lignoceroyl-GPC (24:0)	49617	918	0.00891594	0.00052567	0.397932	0.00829025	Lipid	Lysophospholipid	HMDB10405
alpha-ketobutyrate	4968	915	0.00647102	0.039257	1	0.173787	Amino Acid	Methionine, Cysteine, SAM and Taurine Metabolism	HMDB00005
dimethylglycine	5086	919	-0.00233704	0.283992	1	0.541517	Amino Acid	Glycine, Serine and Threonine Metabolism	HMDB00092
asparagine	512	919	0.000561274	0.581608	1	0.798757	Amino Acid	Alanine and Aspartate Metabolism	HMDB00168
creatinine	513	919	-0.00250493	0.0165648	1	0.100969	Amino Acid	Creatine Metabolism	HMDB00562
cytidine	514	885	-0.00946571	0.0303496	1	0.149186	Nucleotide	Pyrimidine Metabolism, Cytidine containing	HMDB00089
glycosyl-N-stearoyl-sphingosine (d18:1/18:0)	52234	918	-0.0018848	0.432736	1	0.69698	Lipid	Ceramides	NA
2-hydroxybutyrate/2-hydroxyisobutyrate	52281	919	0.00425065	0.125833	1	0.334138	Amino Acid	Glutathione Metabolism	NA
oleate/vaccenate (18:1)	52285	919	0.00354786	0.213676	1	0.459738	Lipid	Long Chain Fatty Acid	NA
N-carbamoylalanine	52340	585	-0.00666762	0.21836	1	0.466944	Amino Acid	Alanine and Aspartate Metabolism	NA
1-palmitoleoylglycerol (16:1)*	52431	741	-0.0029966	0.48128	1	0.720014	Lipid	Monoacylglycerol	HMDB11565
sphingomyelin (d17:1/16:0, d18:1/15:0, d16:1/17:0)*	52433	919	-0.00528919	0.001708	1	0.0208541	Lipid	Sphingolipid Metabolism	NA
palmitoyl dihydrosphingomyelin (d18:0/16:0)*	52434	919	0.00589604	0.000183473	0.138889	0.00408497	Lipid	Sphingolipid Metabolism	NA
sphingomyelin (d18:2/23:0, d18:1/23:1, d17:1/24:1)*	52435	919	0.00414107	0.0403306	1	0.176476	Lipid	Sphingolipid Metabolism	NA
tricosanoyl sphingomyelin (d18:1/23:0)*	52436	919	0.00319038	0.064023	1	0.230788	Lipid	Sphingolipid Metabolism	HMDB12105
sphingomyelin (d18:2/24:1, d18:1/24:2)*	52437	919	0.00568923	5.1143e-05	0.0387153	0.0016193	Lipid	Sphingolipid Metabolism	NA
1-stearoyl-2-oleoyl-GPC (18:0/18:1)	52438	919	-0.00144942	0.476208	1	0.720008	Lipid	Phosphatidylcholine (PC)	HMDB08038
1-stearoyl-2-linoleoyl-GPE (18:0/18:2)*	52446	919	-0.00157992	0.621147	1	0.805482	Lipid	Phosphatidylethanolamine (PE)	HMDB08994
1-stearoyl-2-arachidonoyl-GPE (18:0/20:4)	52447	919	-0.00367245	0.172053	1	0.4013	Lipid	Phosphatidylethanolamine (PE)	HMDB09003
1-stearoyl-2-arachidonoyl-GPI (18:0/20:4)	52449	919	-0.00366849	0.111379	1	0.32181	Lipid	Phosphatidylinositol (PI)	HMDB09815
1-palmitoyl-2-linoleoyl-GPI (16:0/18:2)	52450	898	-0.00338327	0.270477	1	0.529073	Lipid	Phosphatidylinositol (PI)	HMDB09784
1-stearoyl-2-linoleoyl-GPC (18:0/18:2)*	52452	919	0.001906	0.0820454	1	0.26542	Lipid	Phosphatidylcholine (PC)	HMDB08039
1-palmitoyl-2-dihomo-linolenoyl-GPC (16:0/20:3n3 or 6)*	52454	919	-0.00272683	0.0211544	1	0.11044	Lipid	Phosphatidylcholine (PC)	NA
1-palmitoyl-2-oleoyl-GPC (16:0/18:1)	52461	919	-0.00147703	0.268774	1	0.528473	Lipid	Phosphatidylcholine (PC)	HMDB07972
1-palmitoyl-2-arachidonoyl-GPC (16:0/20:4n6)	52462	919	-0.000398341	0.781772	1	0.901034	Lipid	Phosphatidylcholine (PC)	HMDB07982
1-palmitoyl-2-arachidonoyl-GPE (16:0/20:4)*	52464	919	-0.00417001	0.183922	1	0.419186	Lipid	Phosphatidylethanolamine (PE)	HMDB05323
1-palmitoyl-2-docosahexaenoyl-GPE (16:0/22:6)*	52465	919	0.0103171	0.0100891	1	0.0741499	Lipid	Phosphatidylethanolamine (PE)	HMDB05324
1-stearoyl-2-docosahexaenoyl-GPE (18:0/22:6)*	52466	914	0.00918273	0.0434761	1	0.183801	Lipid	Phosphatidylethanolamine (PE)	HMDB05334
1-palmitoyl-2-arachidonoyl-GPI (16:0/20:4)*	52467	906	-0.00443595	0.143303	1	0.360401	Lipid	Phosphatidylinositol (PI)	HMDB09789
1-stearoyl-2-linoleoyl-GPI (18:0/18:2)	52468	918	0.00123925	0.643328	1	0.817113	Lipid	Phosphatidylinositol (PI)	HMDB09809
1-palmitoyl-2-palmitoleoyl-GPC (16:0/16:1)*	52470	919	-0.00677091	0.0294995	1	0.145955	Lipid	Phosphatidylcholine (PC)	HMDB07969
gamma-tocopherol/beta-tocopherol	52473	919	-0.0159843	0.000153115	0.115908	0.00373896	Cofactors and Vitamins	Tocopherol Metabolism	NA
1-(1-enyl-palmitoyl)-GPC (P-16:0)*	52474	919	0.00068854	0.800125	1	0.910819	Lipid	Lysoplasmalogen	HMDB10407
1-(1-enyl-stearoyl)-2-arachidonoyl-GPE (P-18:0/20:4)*	52475	919	-0.00421217	0.114921	1	0.328284	Lipid	Plasmalogen	HMDB05779
1-(1-enyl-palmitoyl)-2-oleoyl-GPE (P-16:0/18:1)*	52477	916	-0.000939943	0.699735	1	0.858552	Lipid	Plasmalogen	HMDB11342
1-(1-enyl-palmitoyl)-2-oleoyl-GPC (P-16:0/18:1)*	52478	919	0.00455864	0.0197787	1	0.106188	Lipid	Plasmalogen	NA
sphingomyelin (d18:1/21:0, d17:1/22:0, d16:1/23:0)*	52495	919	0.00117445	0.59752	1	0.805482	Lipid	Sphingolipid Metabolism	NA
2'-deoxyuridine	52602	910	0.00173848	0.459601	1	0.713903	Nucleotide	Pyrimidine Metabolism, Uracil containing	HMDB00012
1,2-dilinoleoyl-GPC (18:2/18:2)	52603	918	-0.000196693	0.933954	1	0.97851	Lipid	Phosphatidylcholine (PC)	HMDB08138
N-palmitoyl-sphinganine (d18:0/16:0)	52604	906	-0.00124866	0.664152	1	0.83377	Lipid	Sphingolipid Metabolism	HMDB11760
1-palmitoyl-2-docosahexaenoyl-GPC (16:0/22:6)	52610	919	0.00845709	3.01397e-05	0.0228157	0.00108646	Lipid	Phosphatidylcholine (PC)	HMDB07991
1-stearoyl-2-docosahexaenoyl-GPC (18:0/22:6)	52611	919	0.0113874	2.09553e-05	0.0158631	0.000793156	Lipid	Phosphatidylcholine (PC)	HMDB08057
1-(1-enyl-stearoyl)-2-oleoyl-GPE (P-18:0/18:1)	52614	916	-0.00858168	0.00412847	1	0.0411217	Lipid	Plasmalogen	HMDB11375
sphingomyelin (d18:1/17:0, d17:1/18:0, d19:1/16:0)	52615	919	-0.00122027	0.471357	1	0.717754	Lipid	Sphingolipid Metabolism	NA
1-palmitoyl-2-stearoyl-GPC (16:0/18:0)	52616	917	0.00224754	0.279078	1	0.534842	Lipid	Phosphatidylcholine (PC)	HMDB07970
1-stearoyl-2-oleoyl-GPG (18:0/18:1)	52623	913	0.0106335	5.56165e-05	0.0421017	0.0016193	Lipid	Phosphatidylglycerol (PG)	NA
palmitoyl-linoleoyl-glycerol (16:0/18:2) [1]*	52633	855	-0.00607579	0.251603	1	0.511998	Lipid	Diacylglycerol	HMDB07103
palmitoyl-linoleoyl-glycerol (16:0/18:2) [2]*	52634	895	-0.00622996	0.180077	1	0.416283	Lipid	Diacylglycerol	HMDB07103
1-palmitoyl-2-oleoyl-GPI (16:0/18:1)*	52669	898	-0.00767063	0.0144028	1	0.0931877	Lipid	Phosphatidylinositol (PI)	HMDB09783
1-(1-enyl-palmitoyl)-2-arachidonoyl-GPE (P-16:0/20:4)*	52673	919	0.00184305	0.485374	1	0.721862	Lipid	Plasmalogen	HMDB11352
1-(1-enyl-palmitoyl)-2-linoleoyl-GPE (P-16:0/18:2)*	52677	918	-0.000609041	0.833567	1	0.930693	Lipid	Plasmalogen	HMDB11343
1-(1-enyl-palmitoyl)-2-linoleoyl-GPC (P-16:0/18:2)*	52682	919	0.00283486	0.170099	1	0.401138	Lipid	Plasmalogen	HMDB11211
1-(1-enyl-palmitoyl)-2-arachidonoyl-GPC (P-16:0/20:4)*	52689	919	-0.000353843	0.859007	1	0.946533	Lipid	Plasmalogen	HMDB11220
1-linoleoyl-GPA (18:2)*	52690	667	0.00168263	0.687799	1	0.85215	Lipid	Lysophospholipid	HMDB07856
1-oleoyl-2-docosahexaenoyl-GPC (18:1/22:6)*	52697	919	0.00487015	0.0182197	1	0.104625	Lipid	Phosphatidylcholine (PC)	HMDB08123
lactate	527	919	-0.00312663	0.133015	1	0.343661	Carbohydrate	Glycolysis, Gluconeogenesis, and Pyruvate Metabolism	HMDB00190
1-linoleoyl-2-arachidonoyl-GPC (18:2/20:4n6)*	52710	917	0.00147938	0.392515	1	0.667338	Lipid	Phosphatidylcholine (PC)	HMDB08147
1-(1-enyl-palmitoyl)-2-palmitoleoyl-GPC (P-16:0/16:1)*	52713	919	0.00325887	0.13947	1	0.35429	Lipid	Plasmalogen	HMDB11207
1-(1-enyl-palmitoyl)-2-palmitoyl-GPC (P-16:0/16:0)*	52716	919	0.00340514	0.04419	1	0.183801	Lipid	Plasmalogen	HMDB11206
phenol glucuronide	52747	529	-0.00107206	0.906346	1	0.970444	Amino Acid	Tyrosine Metabolism	HMDB60014
1-(1-enyl-stearoyl)-2-linoleoyl-GPE (P-18:0/18:2)*	52748	919	-0.00378877	0.126919	1	0.334138	Lipid	Plasmalogen	HMDB11376
alpha-ketoglutarate	528	919	-0.00185656	0.489644	1	0.726785	Energy	TCA Cycle	HMDB00208
5-hydroxyindole sulfate	52914	416	0.012463	0.0381193	1	0.171328	Amino Acid	Tryptophan Metabolism	NA
2-hydroxylaurate	52916	829	-0.0064962	0.0206671	1	0.108646	Lipid	Fatty Acid, Monohydroxy	NA
phenylacetylglutamate	52925	793	-0.00823967	0.117453	1	0.333003	Peptide	Acetylated Peptides	HMDB59772
3,4-methyleneheptanoylcarnitine	52929	577	-0.000151636	0.978898	1	0.988034	Lipid	Fatty Acid Metabolism(Acyl Carnitine)	NA
palmitoylcholine	52944	919	0.00119291	0.808192	1	0.913117	Lipid	Fatty Acid Metabolism (Acyl Choline)	NA
glycochenodeoxycholate sulfate	52974	831	-0.00522177	0.445336	1	0.708126	Lipid	Primary Bile Acid Metabolism	NA
glycodeoxycholate sulfate	52975	865	0.00728601	0.319436	1	0.579887	Lipid	Secondary Bile Acid Metabolism	NA
glycocholate glucuronide (1)	52977	479	0.000581847	0.951643	1	0.97851	Lipid	Primary Bile Acid Metabolism	NA
glycochenodeoxycholate glucuronide (1)	52983	894	0.0023398	0.730446	1	0.879089	Lipid	Primary Bile Acid Metabolism	NA
3-hydroxybutyrylcarnitine (2)	52984	918	-0.00652485	0.103242	1	0.310136	Lipid	Fatty Acid Metabolism(Acyl Carnitine)	HMDB13127
adipoylcarnitine (C6-DC)	52988	900	-0.0160857	0.00023845	0.180507	0.00475018	Lipid	Fatty Acid Metabolism(Acyl Carnitine)	HMDB61677
glutamine	53	919	-0.000173821	0.828811	1	0.926751	Amino Acid	Glutamate Metabolism	HMDB00641
lactosyl-N-palmitoyl-sphingosine (d18:1/16:0)	53010	919	0.00218905	0.222306	1	0.472713	Lipid	Ceramides	NA
glycosyl-N-palmitoyl-sphingosine (d18:1/16:0)	53013	919	-0.000985762	0.640844	1	0.817113	Lipid	Ceramides	NA
3,4-methyleneheptanoate	53026	655	0.00499424	0.409332	1	0.6746	Xenobiotics	Food Component/Plant	NA
methylsuccinoylcarnitine	53031	638	0.0105064	0.046657	1	0.188873	Amino Acid	Leucine, Isoleucine and Valine Metabolism	NA
3-hydroxy-3-methylglutarate	531	915	0.000152587	0.948854	1	0.97851	Lipid	Mevalonate Metabolism	HMDB00355
1-linoleoyl-2-linolenoyl-GPC (18:2/18:3)*	53176	881	0.0180151	3.95223e-05	0.0299184	0.00135993	Lipid	Phosphatidylcholine (PC)	HMDB08141
1-palmitoleoyl-2-linolenoyl-GPC (16:1/18:3)*	53180	686	0.00582808	0.149729	1	0.370408	Lipid	Phosphatidylcholine (PC)	HMDB08008
1-myristoyl-2-arachidonoyl-GPC (14:0/20:4)*	53195	919	0.00174651	0.621409	1	0.805482	Lipid	Phosphatidylcholine (PC)	HMDB07883
1-oleoyl-2-docosahexaenoyl-GPE (18:1/22:6)*	53209	728	0.0126212	0.0152701	1	0.0970158	Lipid	Phosphatidylethanolamine (PE)	NA
palmitoleoylcarnitine (C16:1)*	53223	919	-0.00917941	0.00273256	1	0.029979	Lipid	Fatty Acid Metabolism(Acyl Carnitine)	NA
pimeloylcarnitine/3-methyladipoylcarnitine (C7-DC)	53224	705	3.8198e-05	0.992392	1	0.993704	Lipid	Fatty Acid Metabolism(Acyl Carnitine)	NA
3-hydroxyhexanoate	53230	919	-0.00394951	0.185967	1	0.42023	Lipid	Fatty Acid, Monohydroxy	NA
thioproline	53231	919	0.00221791	0.26649	1	0.526718	Xenobiotics	Chemical	NA
5-bromotryptophan	53242	919	0.00418107	0.110472	1	0.320412	Amino Acid	Tryptophan Metabolism	NA
caffeic acid sulfate	53254	482	-0.00542095	0.609	1	0.805482	Xenobiotics	Xanthine Metabolism	HMDB41708
eicosapentaenoylcholine	53258	471	0.00297332	0.670819	1	0.836174	Lipid	Fatty Acid Metabolism (Acyl Choline)	NA
oleoylcholine	53260	916	-0.00270721	0.597352	1	0.805482	Lipid	Fatty Acid Metabolism (Acyl Choline)	NA
arachidonoylcholine	53261	916	-0.00129858	0.785578	1	0.901034	Lipid	Fatty Acid Metabolism (Acyl Choline)	NA
dihomo-linolenoyl-choline	53262	847	-0.0124907	0.0215496	1	0.111733	Lipid	Fatty Acid Metabolism (Acyl Choline)	NA
docosahexaenoylcholine	53263	860	0.00823779	0.0928806	1	0.286982	Lipid	Fatty Acid Metabolism (Acyl Choline)	NA
tryptophan	54	919	0.00208872	0.0890854	1	0.280879	Amino Acid	Tryptophan Metabolism	HMDB00929
4-hydroxyphenylacetate	541	278	-0.0187237	0.0413438	1	0.178841	Amino Acid	Phenylalanine Metabolism	HMDB00020
3-hydroxybutyrate (BHBA)	542	919	0.00233786	0.721449	1	0.873819	Lipid	Ketone Bodies	HMDB00357
3beta-hydroxy-5-cholestenoate	54805	919	0.00231972	0.361824	1	0.631108	Lipid	Sterol	NA
1-linoleoyl-GPG (18:2)*	54885	906	0.00378075	0.196204	1	0.436843	Lipid	Lysophospholipid	NA
hexanoylglutamine	54907	898	-0.0094794	0.0944708	1	0.289532	Lipid	Fatty Acid Metabolism (Acyl Glutamine)	NA
vanillactate	54910	796	-0.0088623	0.0136898	1	0.0918612	Amino Acid	Tyrosine Metabolism	HMDB00913
beta-citrylglutamate	54923	918	-0.00668645	0.00497887	1	0.0465309	Amino Acid	Glutamate Metabolism	NA
oleoyl-oleoyl-glycerol (18:1/18:1) [1]*	54945	856	-0.00869329	0.0425912	1	0.181985	Lipid	Diacylglycerol	HMDB07218
oleoyl-oleoyl-glycerol (18:1/18:1) [2]*	54946	915	-0.00879377	0.0380111	1	0.171328	Lipid	Diacylglycerol	HMDB07218
linoleoyl-arachidonoyl-glycerol (18:2/20:4) [1]*	54955	849	0.00060078	0.903449	1	0.969259	Lipid	Diacylglycerol	HMDB07257
linoleoyl-arachidonoyl-glycerol (18:2/20:4) [2]*	54956	845	0.00864929	0.0605766	1	0.223398	Lipid	Diacylglycerol	HMDB07257
oleoyl-arachidonoyl-glycerol (18:1/20:4) [1]*	54960	882	-0.00304203	0.477439	1	0.720008	Lipid	Diacylglycerol	HMDB07228
oleoyl-arachidonoyl-glycerol (18:1/20:4) [2]*	54961	874	-0.00128281	0.758844	1	0.893354	Lipid	Diacylglycerol	HMDB07228
palmitoleoyl-linoleoyl-glycerol (16:1/18:2) [1]*	54967	873	-0.0118906	0.0313913	1	0.151991	Lipid	Diacylglycerol	HMDB07132
linoleoyl-linoleoyl-glycerol (18:2/18:2) [1]*	54968	916	0.00269287	0.604699	1	0.805482	Lipid	Diacylglycerol	HMDB07248
N-stearoyl-sphingosine (d18:1/18:0)*	54979	919	-0.00606882	0.0173521	1	0.101809	Lipid	Ceramides	HMDB04950
beta-alanine	55	919	-0.000519499	0.781003	1	0.901034	Nucleotide	Pyrimidine Metabolism, Uracil containing	HMDB00056
gamma-glutamyl-alpha-lysine	55015	919	0.000420142	0.766504	1	0.893354	Peptide	Gamma-glutamyl Amino Acid	NA
4-hydroxyphenylacetylglutamine	55017	817	-0.0068698	0.188784	1	0.42281	Peptide	Acetylated Peptides	NA
2-oxoarginine*	55072	881	0.00716405	0.0491282	1	0.194712	Amino Acid	Urea cycle; Arginine and Proline Metabolism	HMDB04225
adenine	554	916	-0.00303308	0.214383	1	0.459738	Nucleotide	Purine Metabolism, Adenine containing	HMDB00034
adenosine	555	919	-0.00307427	0.417957	1	0.680416	Nucleotide	Purine Metabolism, Adenine containing	HMDB00050
cystine	56	919	-0.00406629	0.0575758	1	0.219019	Amino Acid	Methionine, Cysteine, SAM and Taurine Metabolism	HMDB00192
phenylpyruvate	566	885	-0.00102204	0.676524	1	0.839555	Amino Acid	Phenylalanine Metabolism	HMDB00205
caffeine	569	873	0.000922185	0.928672	1	0.978019	Xenobiotics	Xanthine Metabolism	HMDB01847
glutamate	57	919	0.000760443	0.80882	1	0.913117	Amino Acid	Glutamate Metabolism	HMDB00148
cytosine	573	433	-0.00190963	0.819102	1	0.920735	Nucleotide	Pyrimidine Metabolism, Cytidine containing	HMDB00630
lignoceroyl sphingomyelin (d18:1/24:0)	57330	919	0.00469685	0.00972271	1	0.0721578	Lipid	Sphingolipid Metabolism	NA
behenoyl dihydrosphingomyelin (d18:0/22:0)*	57331	919	0.00324157	0.27747	1	0.533108	Lipid	Sphingolipid Metabolism	HMDB12091
myristoyl dihydrosphingomyelin (d18:0/14:0)*	57365	919	-0.000833785	0.7039	1	0.860828	Lipid	Sphingolipid Metabolism	HMDB12085
lactosyl-N-nervonoyl-sphingosine (d18:1/24:1)*	57370	919	0.00506342	0.0315227	1	0.151991	Lipid	Ceramides	NA
myristoyl-linoleoyl-glycerol (14:0/18:2) [1]*	57407	655	-0.00812586	0.233046	1	0.487362	Lipid	Diacylglycerol	NA
N-stearoyl-sphingadienine (d18:2/18:0)*	57417	789	-0.00942901	0.0185992	1	0.104625	Lipid	Ceramides	NA
glycosyl-N-behenoyl-sphingadienine (d18:2/22:0)*	57421	919	0.000945366	0.691442	1	0.852634	Lipid	Ceramides	NA
lactosyl-N-behenoyl-sphingosine (d18:1/22:0)*	57422	911	0.000873406	0.750131	1	0.890069	Lipid	Sphingolipid Metabolism	NA
hexadecasphingosine (d16:1)*	57428	322	-0.00808006	0.0894212	1	0.280879	Lipid	Sphingolipid Metabolism	NA
N-palmitoyl-heptadecasphingosine (d17:1/16:0)*	57430	858	-0.0039331	0.170945	1	0.401177	Lipid	Sphingolipid Metabolism	NA
ceramide (d18:2/24:1, d18:1/24:2)*	57443	919	0.00108331	0.631723	1	0.809209	Lipid	Ceramides	NA
glycosyl ceramide (d18:1/23:1, d17:1/24:1)*	57448	594	0.00896823	0.0606062	1	0.223398	Lipid	Ceramides	NA
glycosyl ceramide (d18:2/24:1, d18:1/24:2)*	57453	919	0.00493872	0.054544	1	0.210415	Lipid	Ceramides	NA
argininate*	57461	919	0.0122324	0.000457259	0.346145	0.00744608	Amino Acid	Urea cycle; Arginine and Proline Metabolism	HMDB03148
linoleoylcholine*	57463	919	0.00214562	0.672107	1	0.836174	Lipid	Fatty Acid Metabolism (Acyl Choline)	NA
stearoylcholine*	57464	903	-0.00293403	0.579774	1	0.798757	Lipid	Fatty Acid Metabolism (Acyl Choline)	NA
sphingomyelin (d18:0/18:0, d19:0/17:0)*	57473	919	-0.000882355	0.781974	1	0.901034	Lipid	Sphingolipid Metabolism	HMDB12087
sphingomyelin (d18:2/18:1)*	57474	919	-0.00777492	0.000462306	0.349966	0.00744608	Lipid	Sphingolipid Metabolism	NA
sphingomyelin (d18:1/19:0, d19:1/18:0)*	57475	919	-0.0012408	0.540612	1	0.762008	Lipid	Sphingolipid Metabolism	NA
sphingomyelin (d18:0/20:0, d16:0/22:0)*	57476	919	0.00265997	0.413983	1	0.676857	Lipid	Sphingolipid Metabolism	NA
sphingomyelin (d18:1/22:2, d18:2/22:1, d16:1/24:2)*	57477	919	0.00144198	0.48318	1	0.720014	Lipid	Sphingolipid Metabolism	NA
sphingomyelin (d18:1/25:0, d19:0/24:1, d20:1/23:0, d19:1/24:0)*	57478	919	-0.00333609	0.237022	1	0.490509	Lipid	Sphingolipid Metabolism	NA
sphingomyelin (d18:2/24:2)*	57479	919	0.0046108	0.0344423	1	0.161972	Lipid	Sphingolipid Metabolism	NA
sphingomyelin (d18:2/21:0, d16:2/23:0)*	57480	919	0.000142327	0.942054	1	0.97851	Lipid	Sphingolipid Metabolism	NA
sphingomyelin (d18:1/20:2, d18:2/20:1, d16:1/22:2)*	57481	918	-0.000998054	0.696207	1	0.856958	Lipid	Sphingolipid Metabolism	NA
sphingomyelin (d18:2/23:1)*	57482	919	0.0011078	0.612867	1	0.805482	Lipid	Sphingolipid Metabolism	NA
sphingomyelin (d17:2/16:0, d18:2/15:0)*	57483	919	-0.000649501	0.778521	1	0.901034	Lipid	Sphingolipid Metabolism	NA
arabinose	575	840	-0.00601228	0.0590773	1	0.221394	Carbohydrate	Pentose Metabolism	HMDB00646
linolenoylcarnitine (C18:3)*	57511	917	0.00236716	0.356164	1	0.627015	Lipid	Fatty Acid Metabolism(Acyl Carnitine)	NA
margaroylcarnitine (C17)*	57512	910	-0.0118795	5.51105e-05	0.0417187	0.0016193	Lipid	Fatty Acid Metabolism(Acyl Carnitine)	HMDB06210
arachidoylcarnitine (C20)*	57513	902	-0.00627034	0.019746	1	0.106188	Lipid	Fatty Acid Metabolism(Acyl Carnitine)	HMDB06460
behenoylcarnitine (C22)*	57514	841	-0.00190654	0.60501	1	0.805482	Lipid	Fatty Acid Metabolism(Acyl Carnitine)	NA
lignoceroylcarnitine (C24)*	57515	919	-0.00042066	0.881189	1	0.959799	Lipid	Fatty Acid Metabolism(Acyl Carnitine)	NA
cerotoylcarnitine (C26)*	57516	919	0.00174973	0.494264	1	0.730206	Lipid	Fatty Acid Metabolism(Acyl Carnitine)	HMDB06347
ximenoylcarnitine (C26:1)*	57517	919	0.00374174	0.118995	1	0.334138	Lipid	Fatty Acid Metabolism(Acyl Carnitine)	NA
arachidonoylcarnitine (C20:4)	57518	916	-0.00117148	0.663171	1	0.83377	Lipid	Fatty Acid Metabolism(Acyl Carnitine)	NA
eicosenoylcarnitine (C20:1)*	57519	918	-0.00359826	0.163791	1	0.392644	Lipid	Fatty Acid Metabolism(Acyl Carnitine)	NA
dihomo-linoleoylcarnitine (C20:2)*	57520	908	0.00123194	0.643132	1	0.817113	Lipid	Fatty Acid Metabolism(Acyl Carnitine)	NA
dihomo-linolenoylcarnitine (20:3n3 or 6)*	57521	916	-0.00108544	0.666427	1	0.83386	Lipid	Fatty Acid Metabolism(Acyl Carnitine)	NA
adrenoylcarnitine (C22:4)*	57528	552	-0.00389442	0.262906	1	0.525119	Lipid	Fatty Acid Metabolism(Acyl Carnitine)	NA
nervonoylcarnitine (C24:1)*	57531	902	0.00283805	0.265869	1	0.526718	Lipid	Fatty Acid Metabolism(Acyl Carnitine)	NA
2,3-dihydroxy-2-methylbutyrate	57547	721	0.0053078	0.242365	1	0.49721	Amino Acid	Leucine, Isoleucine and Valine Metabolism	HMDB29576
2'-O-methylcytidine	57554	918	0.00134393	0.397582	1	0.667338	Nucleotide	Pyrimidine Metabolism, Cytidine containing	NA
perfluorooctanesulfonic acid (PFOS)	57564	919	-0.000524231	0.916022	1	0.972159	Xenobiotics	Chemical	HMDB59586
isoursodeoxycholate	57577	911	-0.0214248	0.0161262	1	0.100531	Lipid	Secondary Bile Acid Metabolism	HMDB00686
beta-cryptoxanthin	57591	916	0.0292411	1.29352e-07	9.79193e-05	1.08799e-05	Cofactors and Vitamins	Vitamin A Metabolism	HMDB33844
glycosyl ceramide (d18:1/20:0, d16:1/22:0)*	57595	919	-0.000823171	0.702739	1	0.860798	Lipid	Ceramides	NA
carotene diol (1)	57635	919	0.0231743	8.15166e-11	6.1708e-08	6.1708e-08	Cofactors and Vitamins	Vitamin A Metabolism	NA
carotene diol (2)	57636	917	0.02489	3.94628e-10	2.98733e-07	1.49367e-07	Cofactors and Vitamins	Vitamin A Metabolism	NA
carotene diol (3)	57637	889	0.0197352	1.00764e-05	0.00762787	0.000450426	Cofactors and Vitamins	Vitamin A Metabolism	NA
hexadecadienoate (16:2n6)	57652	919	0.0059458	0.12331	1	0.334138	Lipid	Polyunsaturated Fatty Acid (n3 and n6)	HMDB00477
2'-O-methyluridine	57655	865	-0.00578536	0.0205168	1	0.10861	Nucleotide	Pyrimidine Metabolism, Uracil containing	NA
heneicosapentaenoate (21:5n3)	57658	507	0.0283603	0.0129695	1	0.0884499	Lipid	Polyunsaturated Fatty Acid (n3 and n6)	NA
N-oleoylserine	57664	818	0.00603791	0.0441766	1	0.183801	Lipid	Endocannabinoid	NA
N-trimethyl 5-aminovalerate	57687	919	-0.00551633	0.062341	1	0.226885	Amino Acid	Lysine Metabolism	NA
HWESASXX*	57711	356	-0.00849465	0.265973	1	0.526718	Peptide	Polypeptide	NA
glycocholenate sulfate*	57741	919	-0.00110145	0.727884	1	0.877401	Lipid	Secondary Bile Acid Metabolism	NA
phenylacetate	57745	722	0.00356436	0.494843	1	0.730206	Amino Acid	Phenylalanine Metabolism	HMDB00209
anthranilate	57746	604	-0.00471023	0.165374	1	0.393674	Amino Acid	Tryptophan Metabolism	HMDB01123
3-methylglutaconate	57747	919	0.00100396	0.763038	1	0.893354	Amino Acid	Leucine, Isoleucine and Valine Metabolism	HMDB00522
1H-indole-7-acetic acid	57783	861	-0.00248069	0.614125	1	0.805482	Xenobiotics	Bacterial/Fungal	NA
nisinate (24:6n3)	57810	518	0.0185374	0.00570887	1	0.0514478	Lipid	Polyunsaturated Fatty Acid (n3 and n6)	HMDB02007
(N(1) + N(8))-acetylspermidine	57814	840	0.000843809	0.767016	1	0.893354	Amino Acid	Polyamine Metabolism	NA
glycine	58	919	0.000899497	0.593792	1	0.804115	Amino Acid	Glycine, Serine and Threonine Metabolism	HMDB00123
gluconate	587	919	0.000247833	0.913066	1	0.972098	Xenobiotics	Food Component/Plant	HMDB00625
histidine	59	919	0.000997547	0.319201	1	0.579887	Amino Acid	Histidine Metabolism	HMDB00177
hypotaurine	590	842	-0.00708652	0.0424782	1	0.181985	Amino Acid	Methionine, Cysteine, SAM and Taurine Metabolism	HMDB00965
nicotinamide	594	919	-0.00435776	0.201359	1	0.444098	Cofactors and Vitamins	Nicotinate and Nicotinamide Metabolism	HMDB01406
phytanate	598	919	-0.0033713	0.354644	1	0.625793	Xenobiotics	Food Component/Plant	HMDB00801
corticosterone	5983	487	0.00652139	0.33529	1	0.600035	Lipid	Corticosteroids	HMDB01547
leucine	60	919	-0.000603214	0.557733	1	0.776111	Amino Acid	Leucine, Isoleucine and Valine Metabolism	HMDB00687
dihydroorotate	601	919	-0.00383429	0.227443	1	0.479594	Nucleotide	Pyrimidine Metabolism, Orotate containing	HMDB03349
uracil	605	813	0.00285333	0.233058	1	0.487362	Nucleotide	Pyrimidine Metabolism, Uracil containing	HMDB00300
uridine	606	919	0.00228252	0.1574	1	0.383124	Nucleotide	Pyrimidine Metabolism, Uracil containing	HMDB00296
trans-urocanate	607	911	0.00708906	0.046176	1	0.188873	Amino Acid	Histidine Metabolism	HMDB00301
2-aminoadipate	6146	756	0.00282374	0.406768	1	0.672322	Amino Acid	Lysine Metabolism	HMDB00510
1-cerotoyl-GPC (26:0)*	61505	687	0.00545543	0.094874	1	0.289595	Lipid	Lysophospholipid	HMDB29205
2-hydroxyphytanate*	61702	919	-0.0057692	0.117258	1	0.333003	Lipid	Fatty Acid, Monohydroxy	NA
5-dodecenoylcarnitine (C12:1)	61769	919	-0.00889182	0.00793464	1	0.0660686	Lipid	Fatty Acid Metabolism(Acyl Carnitine)	NA
5,6-dihydrouridine	61833	919	-0.00586587	0.000443719	0.335895	0.00744608	Nucleotide	Pyrimidine Metabolism, Uracil containing	NA
3-hydroxyoleate*	61843	906	0.00633733	0.0718898	1	0.247366	Lipid	Fatty Acid, Monohydroxy	NA
androsterone glucuronide	61846	880	-0.0058999	0.245924	1	0.501791	Lipid	Androgenic Steroids	HMDB02829
ribulonate/xylulonate*	61858	914	0.010934	0.000349378	0.264479	0.00629712	Carbohydrate	Pentose Metabolism	NA
octadecenedioate (C18:1-DC)*	61861	919	0.00937436	0.0112699	1	0.0789936	Lipid	Fatty Acid, Dicarboxylate	NA
hexadecenedioate (C16:1-DC)*	61862	898	-0.00321135	0.397466	1	0.667338	Lipid	Fatty Acid, Dicarboxylate	NA
octadecenedioylcarnitine (C18:1-DC)*	61865	918	0.00339706	0.413315	1	0.676857	Lipid	Fatty Acid Metabolism(Acyl Carnitine)	NA
heptenedioate (C7:1-DC)*	61866	908	-0.018226	5.77738e-08	4.37348e-05	6.98273e-06	Lipid	Fatty Acid, Dicarboxylate	NA
octadecanedioylcarnitine (C18-DC)*	61867	910	-0.000277746	0.942889	1	0.97851	Lipid	Fatty Acid Metabolism(Acyl Carnitine)	NA
1-ribosyl-imidazoleacetate*	61868	919	-0.00293437	0.272942	1	0.531149	Amino Acid	Histidine Metabolism	HMDB02331
3-carboxy-4-methyl-5-pentyl-2-furanpropionate (3-Cmpfp)**	61871	919	0.000214468	0.944652	1	0.97851	Lipid	Fatty Acid, Dicarboxylate	NA
glucuronide of C10H18O2 (1)*	61881	235	-0.0174831	0.206058	1	0.449716	Partially Characterized Molecules	Partially Characterized Molecules	NA
glucuronide of C10H18O2 (7)*	61887	541	-0.0043308	0.654897	1	0.830413	Partially Characterized Molecules	Partially Characterized Molecules	NA
glucuronide of C14H22O4 (2)*	61970	421	0.00759671	0.324347	1	0.584597	Partially Characterized Molecules	Partially Characterized Molecules	NA
N-acetyl-2-aminooctanoate*	62059	919	-0.0061985	0.127564	1	0.334138	Lipid	Fatty Acid, Amino	HMDB59745
hydroxyasparagine**	62060	919	-0.00405476	0.00526001	1	0.0485589	Amino Acid	Alanine and Aspartate Metabolism	NA
3-hydroxystachydrine*	62062	728	0.0167439	0.184397	1	0.419186	Xenobiotics	Food Component/Plant	NA
3-hydroxybutyroylglycine**	62064	910	-0.0023531	0.622466	1	0.805482	Lipid	Fatty Acid Metabolism(Acyl Glycine)	NA
glyco-alpha-muricholate**	62065	442	0.0166563	0.0345129	1	0.161972	Lipid	Primary Bile Acid Metabolism	NA
glyco-beta-muricholate**	62066	754	-0.000363054	0.961472	1	0.981066	Lipid	Primary Bile Acid Metabolism	NA
N-methylhydroxyproline**	62068	703	-0.00863894	0.314135	1	0.578589	Amino Acid	Urea cycle; Arginine and Proline Metabolism	NA
3-hydroxyadipate*	62069	808	-0.00855189	0.0463495	1	0.188873	Lipid	Fatty Acid, Dicarboxylate	HMDB00345
perfluorooctanoate (PFOA)*	62071	919	0.00612659	0.0840864	1	0.26858	Xenobiotics	Chemical	HMDB59587
alpha-ketoglutaramate**	62101	919	0.000900228	0.606525	1	0.805482	Amino Acid	Glutamate Metabolism	NA
cysteinylglycine disulfide*	62103	919	-0.00225103	0.106445	1	0.313619	Amino Acid	Glutathione Metabolism	HMDB00709
gamma-glutamylcitrulline*	62104	919	-0.00391375	0.166411	1	0.3949	Peptide	Gamma-glutamyl Amino Acid	NA
glycine conjugate of C10H12O2*	62145	653	0.00348583	0.481179	1	0.720014	Partially Characterized Molecules	Partially Characterized Molecules	NA
glycine conjugate of C10H14O2 (1)*	62146	882	-0.00408022	0.395405	1	0.667338	Partially Characterized Molecules	Partially Characterized Molecules	NA
sphingomyelin (d17:1/14:0, d16:1/15:0)*	62152	919	-0.00194356	0.478655	1	0.720014	Lipid	Sphingolipid Metabolism	NA
cholesterol	63	919	0.0012728	0.465125	1	0.715079	Lipid	Sterol	HMDB00067
phenylalanine	64	919	-0.000770216	0.36923	1	0.638144	Amino Acid	Phenylalanine Metabolism	HMDB00159

## Sheet: Supplemental Table 6
Supplemental Table 6. The full results of the association tests between each plasma metabolite and physical activity.
Biochemical Names	Compound ID	N	Beta	P	Adjusted P	FDR q	Super pathway	Sub-pathway	HMDB ID
imidazole lactate	15716	919	0.00132091	1.90647e-05	0.014432	0.0119733	Amino Acid	Histidine Metabolism	HMDB02320
alpha-hydroxyisovalerate	33937	919	0.00172735	4.12714e-05	0.0312424	0.0119733	Amino Acid	Leucine, Isoleucine and Valine Metabolism	HMDB00407
glutamate	57	919	-0.00164299	5.74205e-05	0.0434673	0.0119733	Amino Acid	Glutamate Metabolism	HMDB00148
1-(1-enyl-palmitoyl)-2-oleoyl-GPC (P-16:0/18:1)*	52478	919	0.00100663	7.18415e-05	0.054384	0.0119733	Lipid	Plasmalogen	NA
phenyllactate (PLA)	22130	919	0.00116623	7.90836e-05	0.0598663	0.0119733	Amino Acid	Phenylalanine Metabolism	HMDB00779
phytanate	598	919	0.00177425	0.000177003	0.133992	0.0223319	Xenobiotics	Food Component/Plant	HMDB00801
10-undecenoate (11:1n1)	32497	919	0.00151848	0.000246541	0.186632	0.0236858	Lipid	Medium Chain Fatty Acid	HMDB33724
propionylcarnitine (C3)	32452	919	-0.00103282	0.000250312	0.189487	0.0236858	Lipid	Fatty Acid Metabolism (also BCAA Metabolism)	HMDB00824
pyruvate	48990	919	-0.000764938	0.000292281	0.221256	0.024584	Carbohydrate	Glycolysis, Gluconeogenesis, and Pyruvate Metabolism	HMDB00243
2-hydroxyphytanate*	61702	919	0.00169593	0.000390203	0.295384	0.0295384	Lipid	Fatty Acid, Monohydroxy	NA
cortisol	1712	919	0.00120431	0.000655019	0.495849	0.0450772	Lipid	Corticosteroids	HMDB00063
1-lignoceroyl-GPC (24:0)	49617	918	0.00109782	0.000957799	0.725054	0.0604212	Lipid	Lysophospholipid	HMDB10405
indolelactate	18349	919	0.00102191	0.00104304	0.789579	0.0605553	Amino Acid	Tryptophan Metabolism	HMDB00671
lactosyl-N-behenoyl-sphingosine (d18:1/22:0)*	57422	911	0.00116028	0.00111991	0.847774	0.0605553	Lipid	Sphingolipid Metabolism	NA
creatine	27718	919	-0.00124179	0.00122483	0.927195	0.061813	Amino Acid	Creatine Metabolism	HMDB00064
carotene diol (3)	57637	889	0.00185278	0.0013405	1	0.0634223	Cofactors and Vitamins	Vitamin A Metabolism	NA
lactosyl-N-nervonoyl-sphingosine (d18:1/24:1)*	57370	919	0.000966522	0.00150692	1	0.0671021	Lipid	Ceramides	NA
beta-cryptoxanthin	57591	916	0.00224125	0.00162014	1	0.0681358	Cofactors and Vitamins	Vitamin A Metabolism	HMDB33844
4-hydroxyphenylpyruvate	1669	896	-0.00120377	0.00173555	1	0.0691478	Amino Acid	Tyrosine Metabolism	HMDB00707
imidazole propionate	40730	902	-0.00175529	0.00262609	1	0.0993977	Amino Acid	Histidine Metabolism	HMDB02271
gamma-glutamyltyrosine	2734	917	-0.000899632	0.00293583	1	0.10583	Peptide	Gamma-glutamyl Amino Acid	HMDB11741
6-hydroxyindole sulfate	48698	918	-0.00156011	0.00354348	1	0.121928	Xenobiotics	Chemical	NA
2-aminoheptanoate	43761	917	-0.00131691	0.00392502	1	0.129184	Lipid	Fatty Acid, Amino	NA
3-indoxyl sulfate	27672	919	-0.00148296	0.00447218	1	0.138874	Amino Acid	Tryptophan Metabolism	HMDB00682
glycosyl ceramide (d18:1/20:0, d16:1/22:0)*	57595	919	0.000792384	0.00458633	1	0.138874	Lipid	Ceramides	NA
1-oleoyl-GPC (18:1)	48258	919	0.000626466	0.00506528	1	0.147478	Lipid	Lysophospholipid	HMDB02815
uridine	606	919	0.000578853	0.00566416	1	0.150517	Nucleotide	Pyrimidine Metabolism, Uracil containing	HMDB00296
3-(4-hydroxyphenyl)lactate	32197	919	0.00081814	0.00585931	1	0.150517	Amino Acid	Tyrosine Metabolism	HMDB00755
1-cerotoyl-GPC (26:0)*	61505	687	0.00111128	0.00618204	1	0.150517	Lipid	Lysophospholipid	HMDB29205
1-stearoyl-GPE (18:0)	42398	919	0.000807252	0.0063601	1	0.150517	Lipid	Lysophospholipid	HMDB11130
sphingomyelin (d18:2/18:1)*	57474	919	-0.000781794	0.00637772	1	0.150517	Lipid	Sphingolipid Metabolism	NA
cortisone	1769	919	0.000902183	0.0064799	1	0.150517	Lipid	Corticosteroids	HMDB02802
N-acetyl-1-methylhistidine*	43255	904	0.00183027	0.00656151	1	0.150517	Amino Acid	Histidine Metabolism	NA
arachidoylcarnitine (C20)*	57513	902	0.000935888	0.00719364	1	0.155368	Lipid	Fatty Acid Metabolism(Acyl Carnitine)	HMDB06460
erucate (22:1n9)	1552	917	0.00124419	0.0074045	1	0.155368	Lipid	Long Chain Fatty Acid	HMDB02068
4-ethylphenylsulfate	36099	918	0.00332407	0.00741081	1	0.155368	Xenobiotics	Benzoate Metabolism	NA
alpha-hydroxyisocaproate	22132	918	0.000801823	0.00759394	1	0.155368	Amino Acid	Leucine, Isoleucine and Valine Metabolism	HMDB00746
dehydroisoandrosterone sulfate (DHEA-S)	32425	918	0.00162655	0.00816609	1	0.162677	Lipid	Androgenic Steroids	HMDB01032
N2,N5-diacetylornithine	43591	870	0.0014822	0.00850671	1	0.165117	Amino Acid	Urea cycle; Arginine and Proline Metabolism	NA
tartronate (hydroxymalonate)	20693	917	0.00129581	0.00908146	1	0.171867	Xenobiotics	Bacterial/Fungal	HMDB35227
2-stearoyl-GPE (18:0)*	41220	919	0.00087805	0.00972475	1	0.178941	Lipid	Lysophospholipid	HMDB11129
malate	1303	919	0.000506503	0.00992802	1	0.178941	Energy	TCA Cycle	HMDB00156
aspartate	443	919	-0.000697041	0.0102426	1	0.179586	Amino Acid	Alanine and Aspartate Metabolism	HMDB00191
2,3-dihydroxy-2-methylbutyrate	57547	721	0.0014477	0.0105087	1	0.179586	Amino Acid	Leucine, Isoleucine and Valine Metabolism	HMDB29576
5-bromotryptophan	53242	919	-0.000866466	0.0106756	1	0.179586	Amino Acid	Tryptophan Metabolism	NA
1-palmitoyl-GPE (16:0)	35631	919	0.000772519	0.0110817	1	0.179726	Lipid	Lysophospholipid	HMDB11503
palmitoyl sphingomyelin (d18:1/16:0)	37506	919	0.000316603	0.0115963	1	0.179726	Lipid	Sphingolipid Metabolism	NA
succinylcarnitine (C4-DC)	37058	919	-0.000668403	0.0120318	1	0.179726	Energy	TCA Cycle	HMDB61717
succinimide	41888	902	0.000860081	0.0120891	1	0.179726	Xenobiotics	Chemical	NA
palmitoyl dihydrosphingomyelin (d18:0/16:0)*	52434	919	0.000511083	0.0120974	1	0.179726	Lipid	Sphingolipid Metabolism	NA
2-hydroxydecanoate	42489	919	0.00106424	0.0121084	1	0.179726	Lipid	Fatty Acid, Monohydroxy	NA
carotene diol (2)	57636	917	0.00126206	0.0132166	1	0.192403	Cofactors and Vitamins	Vitamin A Metabolism	NA
lysine	1301	919	-0.000324676	0.0138396	1	0.197671	Amino Acid	Lysine Metabolism	HMDB00182
1-(1-enyl-palmitoyl)-2-linoleoyl-GPC (P-16:0/18:2)*	52682	919	0.00065644	0.0141867	1	0.198767	Lipid	Plasmalogen	HMDB11211
tyrosine	1299	919	-0.000405249	0.0147952	1	0.198767	Amino Acid	Tyrosine Metabolism	HMDB00158
gamma-glutamylcitrulline*	62104	919	0.000891272	0.0150291	1	0.198767	Peptide	Gamma-glutamyl Amino Acid	NA
lactate	527	919	-0.000655485	0.0150555	1	0.198767	Carbohydrate	Glycolysis, Gluconeogenesis, and Pyruvate Metabolism	HMDB00190
2'-O-methylcytidine	57554	918	0.000498718	0.0154156	1	0.198767	Nucleotide	Pyrimidine Metabolism, Cytidine containing	NA
gamma-glutamyl-alpha-lysine	55015	919	-0.000443223	0.015612	1	0.198767	Peptide	Gamma-glutamyl Amino Acid	NA
eicosenoylcarnitine (C20:1)*	57519	918	0.000808174	0.0157543	1	0.198767	Lipid	Fatty Acid Metabolism(Acyl Carnitine)	NA
2-aminoadipate	6146	756	-0.00104476	0.0165314	1	0.205151	Amino Acid	Lysine Metabolism	HMDB00510
androsterone sulfate	31591	916	0.00192512	0.0175573	1	0.209827	Lipid	Androgenic Steroids	HMDB02759
tricosanoyl sphingomyelin (d18:1/23:0)*	52436	919	0.000529108	0.0177395	1	0.209827	Lipid	Sphingolipid Metabolism	HMDB12105
lignoceroyl sphingomyelin (d18:1/24:0)	57330	919	0.000556784	0.0177397	1	0.209827	Lipid	Sphingolipid Metabolism	NA
thymol sulfate	36095	875	0.00385786	0.0183993	1	0.210903	Xenobiotics	Food Component/Plant	HMDB01878
2-acetamidophenol sulfate	48580	466	0.00269903	0.0187468	1	0.210903	Xenobiotics	Drug - Analgesics, Anesthetics	NA
1-(1-enyl-palmitoyl)-2-palmitoyl-GPC (P-16:0/16:0)*	52716	919	0.000514897	0.0187957	1	0.210903	Lipid	Plasmalogen	HMDB11206
3-hydroxylaurate	32457	919	0.00119391	0.0189451	1	0.210903	Lipid	Fatty Acid, Monohydroxy	HMDB00387
linoleoyl-linoleoyl-glycerol (18:2/18:2) [1]*	54968	916	-0.00156817	0.0196661	1	0.21162	Lipid	Diacylglycerol	HMDB07248
3-hydroxydecanoate	22053	919	0.00108713	0.0197424	1	0.21162	Lipid	Fatty Acid, Monohydroxy	HMDB02203
adenosine	555	919	0.00114553	0.0198481	1	0.21162	Nucleotide	Purine Metabolism, Adenine containing	HMDB00050
carotene diol (1)	57635	919	0.0010596	0.0201331	1	0.211677	Cofactors and Vitamins	Vitamin A Metabolism	NA
1-methyl-4-imidazoleacetate	32350	919	-0.000706048	0.0214112	1	0.218133	Amino Acid	Histidine Metabolism	HMDB02820
gamma-glutamylisoleucine*	34457	910	-0.000734708	0.0215588	1	0.218133	Peptide	Gamma-glutamyl Amino Acid	HMDB11170
1-(1-enyl-palmitoyl)-GPC (P-16:0)*	52474	919	0.000807555	0.0218899	1	0.218133	Lipid	Lysoplasmalogen	HMDB10407
1-(1-enyl-palmitoyl)-2-palmitoleoyl-GPC (P-16:0/16:1)*	52713	919	0.000654334	0.0218997	1	0.218133	Lipid	Plasmalogen	HMDB11207
chiro-inositol	37112	345	0.00354064	0.0227171	1	0.223336	Lipid	Inositol Metabolism	HMDB34220
eugenol sulfate	48715	679	-0.00301207	0.0234559	1	0.227642	Xenobiotics	Food Component/Plant	NA
4-hydroxyphenylacetylglutamine	55017	817	-0.00154374	0.0239018	1	0.229034	Peptide	Acetylated Peptides	NA
3-hydroxy-2-ethylpropionate	32397	919	0.000660729	0.0250754	1	0.237276	Amino Acid	Leucine, Isoleucine and Valine Metabolism	HMDB00396
N-acetylmethionine	1589	919	-0.000540058	0.0259992	1	0.241344	Amino Acid	Methionine, Cysteine, SAM and Taurine Metabolism	HMDB11745
palmitoleoyl-linoleoyl-glycerol (16:1/18:2) [1]*	54967	873	-0.00159802	0.0261429	1	0.241344	Lipid	Diacylglycerol	HMDB07132
epiandrosterone sulfate	33973	914	0.00176752	0.0265135	1	0.241816	Lipid	Androgenic Steroids	NA
dihomo-linoleoylcarnitine (C20:2)*	57520	908	0.000754747	0.0280519	1	0.252801	Lipid	Fatty Acid Metabolism(Acyl Carnitine)	NA
ornithine	1493	919	-0.000412934	0.0286712	1	0.255342	Amino Acid	Urea cycle; Arginine and Proline Metabolism	HMDB03374
cholesterol	63	919	0.000487634	0.0305159	1	0.266607	Lipid	Sterol	HMDB00067
tauro-beta-muricholate	33983	432	-0.00295517	0.0309668	1	0.266607	Lipid	Primary Bile Acid Metabolism	HMDB00932
3-hydroxyoctanoate	22001	919	0.000957601	0.0309926	1	0.266607	Lipid	Fatty Acid, Monohydroxy	HMDB01954
valine	1649	919	-0.000365474	0.0321204	1	0.273204	Amino Acid	Leucine, Isoleucine and Valine Metabolism	HMDB00883
lactosyl-N-palmitoyl-sphingosine (d18:1/16:0)	53010	919	0.000493888	0.0333757	1	0.279899	Lipid	Ceramides	NA
I-urobilinogen	32426	339	-0.00362799	0.033647	1	0.279899	Cofactors and Vitamins	Hemoglobin and Porphyrin Metabolism	HMDB04157
2-aminooctanoate	43343	919	0.00112194	0.0344043	1	0.282569	Lipid	Fatty Acid, Amino	HMDB00991
2-hydroxy-3-methylvalerate	36746	919	0.000813651	0.0347146	1	0.282569	Amino Acid	Leucine, Isoleucine and Valine Metabolism	HMDB00317
arachidonoylcarnitine (C20:4)	57518	916	0.00072943	0.0362486	1	0.291917	Lipid	Fatty Acid Metabolism(Acyl Carnitine)	NA
phenylacetylglutamate	52925	793	-0.00142947	0.0383157	1	0.297593	Peptide	Acetylated Peptides	HMDB59772
cysteine-glutathione disulfide	35159	909	0.00118116	0.0383277	1	0.297593	Amino Acid	Glutathione Metabolism	HMDB00656
ergothioneine	37459	918	0.00109558	0.0386099	1	0.297593	Xenobiotics	Food Component/Plant	HMDB03045
stearoylcarnitine (C18)	34409	919	0.000620086	0.0387296	1	0.297593	Lipid	Fatty Acid Metabolism(Acyl Carnitine)	HMDB00848
3-hydroxyhexanoate	53230	919	0.000797647	0.038919	1	0.297593	Lipid	Fatty Acid, Monohydroxy	NA
gamma-CEHC glucuronide*	42381	798	-0.00140827	0.0394068	1	0.29831	Cofactors and Vitamins	Tocopherol Metabolism	NA
phenylacetylglutamine	35126	919	-0.00114608	0.0406261	1	0.304495	Peptide	Acetylated Peptides	HMDB06344
N-acetylneuraminate	32377	919	-0.000548284	0.0413254	1	0.305631	Carbohydrate	Aminosugar Metabolism	HMDB00230
3-methyl catechol sulfate (1)	46165	894	0.00197815	0.0415852	1	0.305631	Xenobiotics	Benzoate Metabolism	NA
1-linoleoyl-GPC (18:2)	34419	919	0.00050261	0.0432757	1	0.314804	Lipid	Lysophospholipid	HMDB10386
glycerate	1572	919	0.000595371	0.043665	1	0.314804	Carbohydrate	Glycolysis, Gluconeogenesis, and Pyruvate Metabolism	HMDB00139
N-oleoyltaurine	39732	717	0.00107822	0.0453152	1	0.318725	Lipid	Endocannabinoid	NA
N-acetylglycine	27710	919	0.000979246	0.0456402	1	0.318725	Amino Acid	Glycine, Serine and Threonine Metabolism	HMDB00532
N1-methylinosine	48351	915	-0.000632345	0.0458539	1	0.318725	Nucleotide	Purine Metabolism, (Hypo)Xanthine/Inosine containing	HMDB02721
cytosine	573	433	0.00196043	0.045893	1	0.318725	Nucleotide	Pyrimidine Metabolism, Cytidine containing	HMDB00630
oleoyl-linoleoyl-glycerol (18:1/18:2) [1]	46798	919	-0.000940936	0.0467686	1	0.321853	Lipid	Diacylglycerol	HMDB07219
xanthine	3147	919	-0.000705093	0.0478731	1	0.325249	Nucleotide	Purine Metabolism, (Hypo)Xanthine/Inosine containing	HMDB00292
myristoyl-linoleoyl-glycerol (14:0/18:2) [1]*	57407	655	-0.00171073	0.0484089	1	0.325249	Lipid	Diacylglycerol	NA
N1-methyladenosine	15650	919	-0.000328229	0.0487965	1	0.325249	Nucleotide	Purine Metabolism, Adenine containing	HMDB03331
5-hydroxylysine	15685	843	-0.000699515	0.0493509	1	0.325249	Amino Acid	Lysine Metabolism	HMDB00450
1-stearoyl-GPC (18:0)	33961	919	0.000375705	0.0496145	1	0.325249	Lipid	Lysophospholipid	HMDB10384
bilirubin (E,Z or Z,E)*	47886	919	0.000704121	0.0498399	1	0.325249	Cofactors and Vitamins	Hemoglobin and Porphyrin Metabolism	HMDB00488
sphingomyelin (d18:2/23:0, d18:1/23:1, d17:1/24:1)*	52435	919	0.000510375	0.0507929	1	0.328634	Lipid	Sphingolipid Metabolism	NA
hippurate	15753	919	0.00156506	0.052973	1	0.333987	Xenobiotics	Benzoate Metabolism	HMDB00714
alanine	1126	919	-0.000367494	0.0534705	1	0.333987	Amino Acid	Alanine and Aspartate Metabolism	HMDB00161
oleoyl-linoleoyl-glycerol (18:1/18:2) [2]	46799	919	-0.000907752	0.0536596	1	0.333987	Lipid	Diacylglycerol	HMDB07219
glycocholenate sulfate*	57741	919	-0.000788671	0.0539078	1	0.333987	Lipid	Secondary Bile Acid Metabolism	NA
indolin-2-one	43374	803	-0.00114018	0.0545467	1	0.333987	Xenobiotics	Food Component/Plant	NA
4-acetylphenol sulfate	44620	450	0.00244696	0.0545536	1	0.333987	Xenobiotics	Drug - Other	NA
gamma-glutamylvaline	43829	917	-0.000677874	0.0547087	1	0.333987	Peptide	Gamma-glutamyl Amino Acid	HMDB11172
glycerophosphorylcholine (GPC)	15990	919	0.000596944	0.0561861	1	0.340263	Lipid	Phospholipid Metabolism	HMDB00086
2-oxoarginine*	55072	881	-0.000888864	0.0569506	1	0.340799	Amino Acid	Urea cycle; Arginine and Proline Metabolism	HMDB04225
N-acetylglucosamine/N-acetylgalactosamine	46539	636	-0.000789137	0.057175	1	0.340799	Carbohydrate	Aminosugar Metabolism	HMDB00215
androstenediol (3beta,17beta) monosulfate (2)	37210	870	0.00135975	0.0587523	1	0.347465	Lipid	Androgenic Steroids	NA
1,2-dipalmitoyl-GPC (16:0/16:0)	19130	919	0.000312062	0.0595968	1	0.348184	Lipid	Phosphatidylcholine (PC)	HMDB00564
sphingomyelin (d18:1/21:0, d17:1/22:0, d16:1/23:0)*	52495	919	0.000542484	0.0598712	1	0.348184	Lipid	Sphingolipid Metabolism	NA
inosine	1123	886	0.000925172	0.0603291	1	0.348184	Nucleotide	Purine Metabolism, (Hypo)Xanthine/Inosine containing	HMDB00195
arachidate (20:0)	1118	919	0.000381393	0.0608726	1	0.348184	Lipid	Long Chain Fatty Acid	HMDB02212
formiminoglutamate	43493	875	-0.000741101	0.0613509	1	0.348184	Amino Acid	Histidine Metabolism	HMDB00854
2-methylbutyrylcarnitine (C5)	45095	889	-0.000652739	0.0616336	1	0.348184	Amino Acid	Leucine, Isoleucine and Valine Metabolism	HMDB00378
biliverdin	2137	919	0.000779199	0.0626929	1	0.351545	Cofactors and Vitamins	Hemoglobin and Porphyrin Metabolism	HMDB01008
tryptophan betaine	37097	918	0.00184981	0.0640204	1	0.356349	Amino Acid	Tryptophan Metabolism	HMDB61115
ximenoylcarnitine (C26:1)*	57517	919	0.000574124	0.064764	1	0.356826	Lipid	Fatty Acid Metabolism(Acyl Carnitine)	NA
nonadecanoate (19:0)	1356	919	0.000481216	0.0650489	1	0.356826	Lipid	Long Chain Fatty Acid	HMDB00772
2-aminobutyrate	42374	919	0.000497514	0.0667837	1	0.363707	Amino Acid	Glutathione Metabolism	HMDB00650
2-hydroxyphenylacetate	1432	824	0.000847335	0.0674099	1	0.364495	Amino Acid	Tyrosine Metabolism	HMDB00669
cystathionine	15705	874	-0.00122996	0.0686278	1	0.368185	Amino Acid	Methionine, Cysteine, SAM and Taurine Metabolism	HMDB00099
glycosyl-N-behenoyl-sphingadienine (d18:2/22:0)*	57421	919	0.000560158	0.0690651	1	0.368185	Lipid	Ceramides	NA
5-methylthioadenosine (MTA)	1419	919	-0.000457699	0.0706748	1	0.37363	Amino Acid	Polyamine Metabolism	HMDB01173
beta-alanine	55	919	-0.000437055	0.0710735	1	0.37363	Nucleotide	Pyrimidine Metabolism, Uracil containing	HMDB00056
1-linolenoyl-GPC (18:3)*	45951	919	0.00091722	0.071786	1	0.374772	Lipid	Lysophospholipid	HMDB10388
choline phosphate	34396	911	0.000602265	0.0729257	1	0.377254	Lipid	Phospholipid Metabolism	HMDB01565
oxalate (ethanedioate)	20694	919	0.000679034	0.0735013	1	0.377254	Cofactors and Vitamins	Ascorbate and Aldarate Metabolism	HMDB02329
citrate	1564	919	0.000224564	0.0740704	1	0.377254	Energy	TCA Cycle	HMDB00094
N4-acetylcytidine	35130	829	-0.000864702	0.0742547	1	0.377254	Nucleotide	Pyrimidine Metabolism, Cytidine containing	HMDB05923
ethyl glucuronide	39603	349	0.00309983	0.0750813	1	0.37891	Xenobiotics	Chemical	HMDB10325
hexanoylglutamine	54907	898	0.00131016	0.0772487	1	0.387267	Lipid	Fatty Acid Metabolism (Acyl Glutamine)	NA
sphingomyelin (d17:1/14:0, d16:1/15:0)*	62152	919	0.000626442	0.0778317	1	0.387379	Lipid	Sphingolipid Metabolism	NA
acetylcarnitine (C2)	32198	919	0.000495609	0.0787581	1	0.387379	Lipid	Fatty Acid Metabolism(Acyl Carnitine)	HMDB00201
linoleoyl-arachidonoyl-glycerol (18:2/20:4) [1]*	54955	849	-0.00113647	0.0788092	1	0.387379	Lipid	Diacylglycerol	HMDB07257
phenylalanine	64	919	-0.000195012	0.079318	1	0.387379	Amino Acid	Phenylalanine Metabolism	HMDB00159
palmitoyl-linoleoyl-glycerol (16:0/18:2) [2]*	52634	895	-0.00104743	0.0811291	1	0.390109	Lipid	Diacylglycerol	HMDB07103
gamma-glutamyl-epsilon-lysine	33934	897	-0.000455839	0.0813828	1	0.390109	Peptide	Gamma-glutamyl Amino Acid	HMDB03869
pregn steroid monosulfate C21H34O5S*	32619	919	0.00103325	0.0817018	1	0.390109	Lipid	Pregnenolone Steroids	NA
sphingomyelin (d18:1/20:2, d18:2/20:1, d16:1/22:2)*	57481	918	-0.00057547	0.0819384	1	0.390109	Lipid	Sphingolipid Metabolism	NA
bilirubin (Z,Z)	43807	919	0.000558108	0.0844862	1	0.399726	Cofactors and Vitamins	Hemoglobin and Porphyrin Metabolism	HMDB00054
indolepropionate	32405	912	0.0012273	0.086938	1	0.408771	Amino Acid	Tryptophan Metabolism	HMDB02302
myristoyl dihydrosphingomyelin (d18:0/14:0)*	57365	919	0.000485782	0.0875015	1	0.408881	Lipid	Sphingolipid Metabolism	HMDB12085
guanidinosuccinate	32446	593	0.00112744	0.0894062	1	0.415218	Amino Acid	Guanidino and Acetamido Metabolism	HMDB03157
glycosyl ceramide (d18:2/24:1, d18:1/24:2)*	57453	919	0.000561514	0.0907731	1	0.417392	Lipid	Ceramides	NA
5alpha-androstan-3alpha,17alpha-diol monosulfate	37183	360	0.00132552	0.0913502	1	0.417392	Lipid	Androgenic Steroids	NA
1-(1-enyl-oleoyl)-GPE (P-18:1)*	44621	889	0.000842759	0.0915285	1	0.417392	Lipid	Lysoplasmalogen	NA
glucose	48152	919	-0.000193258	0.0925292	1	0.419429	Carbohydrate	Glycolysis, Gluconeogenesis, and Pyruvate Metabolism	HMDB00122
1-palmitoyl-GPC (16:0)	33955	919	0.000289784	0.0944424	1	0.42451	Lipid	Lysophospholipid	HMDB10382
homocitrulline	22138	869	0.00102097	0.0947718	1	0.42451	Amino Acid	Urea cycle; Arginine and Proline Metabolism	HMDB00679
glycerol	15122	919	-0.000660188	0.0969201	1	0.42979	Lipid	Glycerolipid Metabolism	HMDB00131
butyrylcarnitine (C4)	32412	916	-0.00069822	0.0970861	1	0.42979	Lipid	Fatty Acid Metabolism (also BCAA Metabolism)	HMDB02013
heptenedioate (C7:1-DC)*	61866	908	0.000715365	0.0979663	1	0.431166	Lipid	Fatty Acid, Dicarboxylate	NA
vanillylmandelate (VMA)	1567	918	0.000527277	0.100605	1	0.440219	Amino Acid	Tyrosine Metabolism	HMDB00291
methionine	1302	919	-0.000263979	0.101283	1	0.44064	Amino Acid	Methionine, Cysteine, SAM and Taurine Metabolism	HMDB00696
pimeloylcarnitine/3-methyladipoylcarnitine (C7-DC)	53224	705	0.000857137	0.102516	1	0.443455	Lipid	Fatty Acid Metabolism(Acyl Carnitine)	NA
3-methoxytyramine sulfate	44618	360	-0.00112301	0.104016	1	0.447387	Amino Acid	Tyrosine Metabolism	NA
propyl 4-hydroxybenzoate sulfate	48460	496	0.00290943	0.106874	1	0.453759	Xenobiotics	Benzoate Metabolism	NA
pregnenolone sulfate	38170	852	0.00105564	0.107489	1	0.453759	Lipid	Pregnenolone Steroids	HMDB00774
gamma-CEHC	44876	919	-0.000948633	0.108613	1	0.453759	Cofactors and Vitamins	Tocopherol Metabolism	HMDB01931
nisinate (24:6n3)	57810	518	0.00131393	0.109032	1	0.453759	Lipid	Polyunsaturated Fatty Acid (n3 and n6)	HMDB02007
hydantoin-5-propionic acid	40473	914	-0.000811304	0.10944	1	0.453759	Amino Acid	Histidine Metabolism	HMDB01212
propionylglycine	31932	837	-0.000849109	0.109446	1	0.453759	Lipid	Fatty Acid Metabolism (also BCAA Metabolism)	HMDB00783
stachydrine	34384	919	0.00224676	0.109693	1	0.453759	Xenobiotics	Food Component/Plant	HMDB04827
3-methoxycatechol sulfate (1)	48763	746	0.0020086	0.110312	1	0.45384	Xenobiotics	Benzoate Metabolism	NA
leucine	60	919	-0.00021228	0.111126	1	0.454714	Amino Acid	Leucine, Isoleucine and Valine Metabolism	HMDB00687
palmitoylcholine	52944	919	0.00100916	0.112717	1	0.458746	Lipid	Fatty Acid Metabolism (Acyl Choline)	NA
phenylacetate	57745	722	-0.0010654	0.116471	1	0.471489	Amino Acid	Phenylalanine Metabolism	HMDB00209
sphingomyelin (d18:1/18:1, d18:2/18:0)	37529	919	-0.000307922	0.119039	1	0.478621	Lipid	Sphingolipid Metabolism	HMDB12101
tartarate	15336	768	0.00116413	0.120523	1	0.478621	Xenobiotics	Food Component/Plant	HMDB00956
1-linoleoyl-GPG (18:2)*	54885	906	-0.000588255	0.122054	1	0.478621	Lipid	Lysophospholipid	NA
1-(1-enyl-palmitoyl)-2-arachidonoyl-GPE (P-16:0/20:4)*	52673	919	-0.000528656	0.122201	1	0.478621	Lipid	Plasmalogen	HMDB11352
p-cresol sulfate	36103	919	-0.00122013	0.122871	1	0.478621	Xenobiotics	Benzoate Metabolism	HMDB11635
2-hydroxyhippurate (salicylurate)	18281	917	0.00269842	0.12288	1	0.478621	Xenobiotics	Benzoate Metabolism	HMDB00840
p-cresol-glucuronide*	48841	898	-0.00168101	0.124395	1	0.478621	Amino Acid	Tyrosine Metabolism	HMDB11686
oleoylcholine	53260	916	0.00101638	0.124587	1	0.478621	Lipid	Fatty Acid Metabolism (Acyl Choline)	NA
N-acetylputrescine	37496	919	-0.000388208	0.124703	1	0.478621	Amino Acid	Polyamine Metabolism	HMDB02064
17-methylstearate (i19:0)	38296	919	0.000541731	0.125111	1	0.478621	Lipid	Fatty Acid, Branched	HMDB37397
N-acetylcitrulline	48434	717	-0.00119405	0.125187	1	0.478621	Amino Acid	Urea cycle; Arginine and Proline Metabolism	HMDB00856
3-aminoisobutyrate	1566	919	0.000615513	0.127814	1	0.485451	Nucleotide	Pyrimidine Metabolism, Thymine containing	HMDB03911
tyramine O-sulfate	48408	775	-0.00142798	0.128657	1	0.485451	Amino Acid	Tyrosine Metabolism	HMDB06409
methyl glucopyranoside (alpha + beta)	46144	836	0.00130957	0.128898	1	0.485451	Xenobiotics	Food Component/Plant	NA
5alpha-androstan-3beta,17beta-diol disulfate	37190	909	0.00141269	0.131851	1	0.491382	Lipid	Androgenic Steroids	HMDB00493
benzoate	15778	870	-0.000642816	0.13246	1	0.491382	Xenobiotics	Benzoate Metabolism	HMDB01870
phenylacetylcarnitine	48425	802	-0.00121892	0.132618	1	0.491382	Peptide	Acetylated Peptides	NA
serine	1648	919	-0.000265042	0.133069	1	0.491382	Amino Acid	Glycine, Serine and Threonine Metabolism	HMDB00187
3-hydroxyoleate*	61843	906	0.000678392	0.136407	1	0.501095	Lipid	Fatty Acid, Monohydroxy	NA
1-oleoyl-GPI (18:1)*	36602	898	0.000862839	0.137023	1	0.501095	Lipid	Lysophospholipid	NA
gamma-glutamylleucine	18369	919	-0.000345842	0.138816	1	0.505209	Peptide	Gamma-glutamyl Amino Acid	HMDB11171
mannitol/sorbitol	46142	919	-0.00122399	0.141162	1	0.50662	Carbohydrate	Fructose, Mannose and Galactose Metabolism	HMDB00247
N6-carbamoylthreonyladenosine	35157	918	-0.000388869	0.141518	1	0.50662	Nucleotide	Purine Metabolism, Adenine containing	HMDB41623
androstenediol (3beta,17beta) monosulfate (1)	37211	912	0.00106246	0.141856	1	0.50662	Lipid	Androgenic Steroids	HMDB03818
alpha-CEHC sulfate	47666	557	-0.00172142	0.14188	1	0.50662	Cofactors and Vitamins	Tocopherol Metabolism	NA
hexadecadienoate (16:2n6)	57652	919	-0.000730144	0.143568	1	0.508161	Lipid	Polyunsaturated Fatty Acid (n3 and n6)	HMDB00477
linoleoylcholine*	57463	919	0.000959664	0.143654	1	0.508161	Lipid	Fatty Acid Metabolism (Acyl Choline)	NA
taurocholenate sulfate	32807	919	-0.000904246	0.144407	1	0.508447	Lipid	Secondary Bile Acid Metabolism	NA
maleate	20676	882	-0.000598314	0.145859	1	0.511182	Lipid	Fatty Acid, Dicarboxylate	HMDB00176
uracil	605	813	0.000443974	0.147922	1	0.514134	Nucleotide	Pyrimidine Metabolism, Uracil containing	HMDB00300
3-hydroxybutyroylglycine**	62064	910	0.000895268	0.14806	1	0.514134	Lipid	Fatty Acid Metabolism(Acyl Glycine)	NA
isovalerylcarnitine (C5)	34407	919	-0.000559258	0.14894	1	0.514829	Amino Acid	Leucine, Isoleucine and Valine Metabolism	HMDB00688
eicosapentaenoate (EPA; 20:5n3)	18467	919	0.000911337	0.149937	1	0.515921	Lipid	Polyunsaturated Fatty Acid (n3 and n6)	HMDB01999
behenoyl sphingomyelin (d18:1/22:0)*	48492	919	0.000279356	0.153165	1	0.524642	Lipid	Sphingolipid Metabolism	HMDB12103
androstenediol (3alpha, 17alpha) monosulfate (3)	37209	905	0.000836187	0.156236	1	0.527998	Lipid	Androgenic Steroids	NA
androstenediol (3beta,17beta) disulfate (1)	37202	918	0.00107569	0.156255	1	0.527998	Lipid	Androgenic Steroids	HMDB03818
glycosyl-N-palmitoyl-sphingosine (d18:1/16:0)	53013	919	0.00038713	0.157112	1	0.527998	Lipid	Ceramides	NA
1-linoleoyl-GPA (18:2)*	52690	667	-0.000734657	0.158945	1	0.527998	Lipid	Lysophospholipid	HMDB07856
gamma-glutamylmethionine	44872	919	-0.000303421	0.159015	1	0.527998	Peptide	Gamma-glutamyl Amino Acid	HMDB29155
N2-acetyllysine	36751	501	0.00115018	0.159257	1	0.527998	Amino Acid	Lysine Metabolism	HMDB00446
isoleucine	1125	919	-0.000200399	0.159269	1	0.527998	Amino Acid	Leucine, Isoleucine and Valine Metabolism	HMDB00172
3-hydroxyisobutyrate	1549	910	-0.00050697	0.159734	1	0.527998	Amino Acid	Leucine, Isoleucine and Valine Metabolism	HMDB00336
1-arachidonoyl-GPC (20:4n6)*	33228	919	0.000439766	0.160422	1	0.527998	Lipid	Lysophospholipid	HMDB10395
N-delta-acetylornithine	43249	919	0.000692475	0.162275	1	0.531784	Amino Acid	Urea cycle; Arginine and Proline Metabolism	NA
S-1-pyrroline-5-carboxylate	42370	918	0.000403015	0.163156	1	0.532367	Amino Acid	Glutamate Metabolism	HMDB01301
deoxycarnitine	36747	919	0.000259949	0.16636	1	0.54049	Lipid	Carnitine Metabolism	HMDB01161
histidine	59	919	-0.000178683	0.168171	1	0.544042	Amino Acid	Histidine Metabolism	HMDB00177
sphingomyelin (d18:1/14:0, d16:1/16:0)*	42463	919	0.000250484	0.171883	1	0.552414	Lipid	Sphingolipid Metabolism	HMDB12097
dimethylglycine	5086	919	-0.000384579	0.172219	1	0.552414	Amino Acid	Glycine, Serine and Threonine Metabolism	HMDB00092
3-methylglutarylcarnitine (2)	46548	917	-0.000865101	0.175312	1	0.559964	Amino Acid	Leucine, Isoleucine and Valine Metabolism	HMDB00552
1-oleoyl-GPE (18:1)	35628	919	0.000530368	0.18049	1	0.570883	Lipid	Lysophospholipid	HMDB11506
1-(1-enyl-palmitoyl)-GPE (P-16:0)*	39270	919	0.000450656	0.180542	1	0.570883	Lipid	Lysoplasmalogen	NA
5,6-dihydrothymine	1418	918	0.000352173	0.181545	1	0.570883	Nucleotide	Pyrimidine Metabolism, Thymine containing	HMDB00079
palmitoyl-linoleoyl-glycerol (16:0/18:2) [1]*	52633	855	-0.000913736	0.181747	1	0.570883	Lipid	Diacylglycerol	HMDB07103
betonicine	38100	642	0.00234449	0.184797	1	0.578065	Xenobiotics	Food Component/Plant	HMDB29412
4-acetaminophen sulfate	37475	397	-0.00523143	0.185782	1	0.57818	Xenobiotics	Drug - Analgesics, Anesthetics	HMDB59911
9-hydroxystearate	47120	887	0.000608032	0.186362	1	0.57818	Lipid	Fatty Acid, Monohydroxy	HMDB61661
N-acetylaspartate (NAA)	22185	919	0.000209624	0.187252	1	0.578416	Amino Acid	Alanine and Aspartate Metabolism	HMDB00812
pregnanolone/allopregnanolone sulfate	48394	200	0.00246757	0.188889	1	0.578416	Lipid	Progestin Steroids	NA
5alpha-androstan-3beta,17alpha-diol disulfate	37187	695	0.00140317	0.190182	1	0.578416	Lipid	Androgenic Steroids	NA
2'-O-methyluridine	57655	865	0.000419455	0.190798	1	0.578416	Nucleotide	Pyrimidine Metabolism, Uracil containing	NA
glucuronide of C10H18O2 (7)*	61887	541	0.00156584	0.191189	1	0.578416	Partially Characterized Molecules	Partially Characterized Molecules	NA
sphingomyelin (d18:1/24:1, d18:2/24:0)*	47153	919	0.000305255	0.191308	1	0.578416	Lipid	Sphingolipid Metabolism	HMDB12107
3-hydroxysebacate	31943	839	0.000940009	0.191787	1	0.578416	Lipid	Fatty Acid, Monohydroxy	HMDB00350
4-hydroxychlorothalonil	48441	919	-0.000629242	0.193237	1	0.580478	Xenobiotics	Chemical	NA
iminodiacetate (IDA)	21025	919	0.000295007	0.195224	1	0.583627	Xenobiotics	Chemical	HMDB11753
C-glycosyltryptophan	48782	919	-0.000332723	0.195827	1	0.583627	Amino Acid	Tryptophan Metabolism	NA
5alpha-androstan-3beta,17beta-diol monosulfate (2)	37192	669	0.000989142	0.197295	1	0.585694	Lipid	Androgenic Steroids	NA
gamma-glutamylglutamate	36738	907	-0.000443401	0.198207	1	0.586105	Peptide	Gamma-glutamyl Amino Acid	HMDB11737
caprate (10:0)	1642	919	0.000544031	0.200824	1	0.590346	Lipid	Medium Chain Fatty Acid	HMDB00511
16a-hydroxy DHEA 3-sulfate	38168	915	-0.0010543	0.201201	1	0.590346	Lipid	Androgenic Steroids	NA
3-carboxy-4-methyl-5-pentyl-2-furanpropionate (3-Cmpfp)**	61871	919	0.00051009	0.202104	1	0.590707	Lipid	Fatty Acid, Dicarboxylate	NA
3-phenylpropionate (hydrocinnamate)	15749	784	0.00122681	0.204599	1	0.595699	Xenobiotics	Benzoate Metabolism	HMDB00764
dihomo-linolenoylcarnitine (20:3n3 or 6)*	57521	916	0.000411377	0.206903	1	0.596227	Lipid	Fatty Acid Metabolism(Acyl Carnitine)	NA
glycohyocholate	42574	668	0.00108816	0.207054	1	0.596227	Lipid	Secondary Bile Acid Metabolism	NA
arabinose	575	840	-0.00052746	0.207655	1	0.596227	Carbohydrate	Pentose Metabolism	HMDB00646
threonine	1284	919	-0.000251664	0.2084	1	0.596227	Amino Acid	Glycine, Serine and Threonine Metabolism	HMDB00167
cerotoylcarnitine (C26)*	57516	919	0.000416328	0.209216	1	0.596227	Lipid	Fatty Acid Metabolism(Acyl Carnitine)	HMDB06347
arginine	1638	919	-0.000238268	0.209507	1	0.596227	Amino Acid	Urea cycle; Arginine and Proline Metabolism	HMDB00517
hydroxyasparagine**	62060	919	-0.00023438	0.211074	1	0.598437	Amino Acid	Alanine and Aspartate Metabolism	NA
salicylate	1515	918	0.00199407	0.212994	1	0.600421	Xenobiotics	Drug - Topical Agents	HMDB01895
docosapentaenoate (n3 DPA; 22:5n3)	32504	919	0.000659522	0.21336	1	0.600421	Lipid	Polyunsaturated Fatty Acid (n3 and n6)	HMDB06528
N-palmitoyl-heptadecasphingosine (d17:1/16:0)*	57430	858	-0.000463456	0.215109	1	0.603102	Lipid	Sphingolipid Metabolism	NA
7-alpha-hydroxy-3-oxo-4-cholestenoate (7-Hoca)	36776	919	-0.000331516	0.217203	1	0.606429	Lipid	Sterol	HMDB12458
1-palmitoyl-2-arachidonoyl-GPI (16:0/20:4)*	52467	906	-0.000482767	0.217898	1	0.606429	Lipid	Phosphatidylinositol (PI)	HMDB09789
1-linoleoylglycerol (18:2)	27447	910	-0.000582699	0.22163	1	0.612671	Lipid	Monoacylglycerol	NA
hexanoylglycine	35436	578	0.000840746	0.222393	1	0.612671	Lipid	Fatty Acid Metabolism(Acyl Glycine)	HMDB00701
1-oleoyl-GPG (18:1)*	45968	559	-0.000751997	0.222569	1	0.612671	Lipid	Lysophospholipid	NA
glucuronide of C14H22O4 (2)*	61970	421	-0.00123393	0.224513	1	0.615179	Partially Characterized Molecules	Partially Characterized Molecules	NA
myo-inositol	1124	919	0.00045993	0.225105	1	0.615179	Lipid	Inositol Metabolism	HMDB00211
N-methylproline	37431	919	0.00132375	0.230477	1	0.627594	Amino Acid	Urea cycle; Arginine and Proline Metabolism	NA
2-palmitoyl-GPC (16:0)*	35253	919	0.000313624	0.232191	1	0.629995	Lipid	Lysophospholipid	HMDB61702
sphingomyelin (d17:1/16:0, d18:1/15:0, d16:1/17:0)*	52433	919	0.000257626	0.236867	1	0.638291	Lipid	Sphingolipid Metabolism	NA
1-stearoyl-2-arachidonoyl-GPI (18:0/20:4)	52449	919	-0.000352481	0.236935	1	0.638291	Lipid	Phosphatidylinositol (PI)	HMDB09815
N-acetyl-2-aminooctanoate*	62059	919	0.000621048	0.238209	1	0.638555	Lipid	Fatty Acid, Amino	HMDB59745
betaine	3141	919	0.000235263	0.23872	1	0.638555	Amino Acid	Glycine, Serine and Threonine Metabolism	HMDB00043
maltose	15586	515	-0.00125502	0.240995	1	0.64236	Carbohydrate	Glycogen Metabolism	HMDB00163
3-hydroxybutyrylcarnitine (2)	52984	918	0.000604207	0.243061	1	0.64236	Lipid	Fatty Acid Metabolism(Acyl Carnitine)	HMDB13127
N-stearoyl-sphingosine (d18:1/18:0)*	54979	919	-0.000384498	0.243339	1	0.64236	Lipid	Ceramides	HMDB04950
laurate (12:0)	1645	919	0.000546127	0.243537	1	0.64236	Lipid	Medium Chain Fatty Acid	HMDB00638
1,3-dimethylurate	32391	776	-0.000991379	0.245377	1	0.644965	Xenobiotics	Xanthine Metabolism	HMDB01857
alpha-tocopherol	1561	919	0.000290409	0.247735	1	0.648912	Cofactors and Vitamins	Tocopherol Metabolism	HMDB01893
linolenoylcarnitine (C18:3)*	57511	917	0.000380561	0.251339	1	0.656082	Lipid	Fatty Acid Metabolism(Acyl Carnitine)	NA
guaiacol sulfate	46111	919	0.000749777	0.254245	1	0.661094	Xenobiotics	Benzoate Metabolism	HMDB60013
ribonate	27731	919	-0.000351606	0.255006	1	0.661094	Carbohydrate	Pentose Metabolism	HMDB00867
cysteine sulfinic acid	37443	604	0.000453767	0.258708	1	0.666283	Amino Acid	Methionine, Cysteine, SAM and Taurine Metabolism	HMDB00996
1-linoleoyl-GPE (18:2)*	36600	919	0.000385308	0.25937	1	0.666283	Lipid	Lysophospholipid	HMDB11507
octadecanedioylcarnitine (C18-DC)*	61867	910	-0.000564406	0.259648	1	0.666283	Lipid	Fatty Acid Metabolism(Acyl Carnitine)	NA
4-hydroxyphenylacetate	541	278	-0.00117403	0.267287	1	0.677209	Amino Acid	Phenylalanine Metabolism	HMDB00020
S-adenosylhomocysteine (SAH)	42382	669	-0.000466773	0.267578	1	0.677209	Amino Acid	Methionine, Cysteine, SAM and Taurine Metabolism	HMDB00939
orotidine	35172	919	-0.000534583	0.268404	1	0.677209	Nucleotide	Pyrimidine Metabolism, Orotate containing	HMDB00788
oleoylcarnitine (C18:1)	35160	919	0.000298005	0.269171	1	0.677209	Lipid	Fatty Acid Metabolism(Acyl Carnitine)	HMDB05065
glycerophosphoethanolamine	37455	919	0.000784483	0.269251	1	0.677209	Lipid	Phospholipid Metabolism	HMDB00114
glycodeoxycholate	18477	777	0.0011993	0.269273	1	0.677209	Lipid	Secondary Bile Acid Metabolism	HMDB00631
methionine sulfone	44878	919	0.000403156	0.270959	1	0.679191	Amino Acid	Methionine, Cysteine, SAM and Taurine Metabolism	NA
7-methylguanine	35114	919	0.000191592	0.27224	1	0.679582	Nucleotide	Purine Metabolism, Guanine containing	HMDB00897
citrulline	2132	919	0.000217654	0.27291	1	0.679582	Amino Acid	Urea cycle; Arginine and Proline Metabolism	HMDB00904
docosahexaenoylcholine	53263	860	0.000689448	0.278472	1	0.688711	Lipid	Fatty Acid Metabolism (Acyl Choline)	NA
beta-citrylglutamate	54923	918	-0.000332579	0.279064	1	0.688711	Amino Acid	Glutamate Metabolism	NA
N-methyltaurine	42989	515	0.00138397	0.279404	1	0.688711	Amino Acid	Methionine, Cysteine, SAM and Taurine Metabolism	NA
heneicosapentaenoate (21:5n3)	57658	507	0.00145205	0.280215	1	0.688711	Lipid	Polyunsaturated Fatty Acid (n3 and n6)	NA
N-stearoyl-sphingadienine (d18:2/18:0)*	57417	789	-0.000565044	0.28806	1	0.70525	Lipid	Ceramides	NA
proline	1898	919	-0.000248827	0.288808	1	0.70525	Amino Acid	Urea cycle; Arginine and Proline Metabolism	HMDB00162
N-acetylphenylalanine	33950	906	-0.000378178	0.290746	1	0.7077	Amino Acid	Phenylalanine Metabolism	HMDB00512
cystine	56	919	-0.000291476	0.292386	1	0.709412	Amino Acid	Methionine, Cysteine, SAM and Taurine Metabolism	HMDB00192
1-linoleoyl-2-arachidonoyl-GPC (18:2/20:4n6)*	52710	917	0.000236668	0.293665	1	0.710238	Lipid	Phosphatidylcholine (PC)	HMDB08147
methyl-4-hydroxybenzoate sulfate	48429	888	0.00174462	0.296454	1	0.712506	Xenobiotics	Benzoate Metabolism	NA
sphingomyelin (d18:1/25:0, d19:0/24:1, d20:1/23:0, d19:1/24:0)*	57478	919	0.000380703	0.296485	1	0.712506	Lipid	Sphingolipid Metabolism	NA
1-linoleoyl-GPI (18:2)*	36594	919	0.000420934	0.299909	1	0.715949	Lipid	Lysophospholipid	NA
andro steroid monosulfate C19H28O6S (1)*	32827	771	-0.000759894	0.300374	1	0.715949	Lipid	Androgenic Steroids	HMDB02759
1,7-dimethylurate	34400	884	-0.00106113	0.300935	1	0.715949	Xenobiotics	Xanthine Metabolism	HMDB11103
behenoyl dihydrosphingomyelin (d18:0/22:0)*	57331	919	0.000398293	0.3021	1	0.715949	Lipid	Sphingolipid Metabolism	HMDB12091
N-acetylleucine	1587	867	-0.000324735	0.303179	1	0.715949	Amino Acid	Leucine, Isoleucine and Valine Metabolism	HMDB11756
N6-succinyladenosine	48130	663	-0.000465228	0.303878	1	0.715949	Nucleotide	Purine Metabolism, Adenine containing	HMDB00912
alliin	41494	652	-0.00139824	0.304668	1	0.715949	Xenobiotics	Food Component/Plant	HMDB33592
docosadienoate (22:2n6)	32415	919	0.000424791	0.306615	1	0.715949	Lipid	Polyunsaturated Fatty Acid (n3 and n6)	HMDB61714
1-methylhistidine	30460	916	0.000418123	0.306879	1	0.715949	Amino Acid	Histidine Metabolism	HMDB00001
linoleoyl-arachidonoyl-glycerol (18:2/20:4) [2]*	54956	845	-0.000622466	0.307462	1	0.715949	Lipid	Diacylglycerol	HMDB07257
stearoylcholine*	57464	903	0.000696089	0.308321	1	0.715949	Lipid	Fatty Acid Metabolism (Acyl Choline)	NA
HWESASXX*	57711	356	-0.000907512	0.30981	1	0.717205	Peptide	Polypeptide	NA
gamma-glutamylphenylalanine	33422	919	-0.000261145	0.314808	1	0.720779	Peptide	Gamma-glutamyl Amino Acid	HMDB00594
cytidine	514	885	-0.00056612	0.315097	1	0.720779	Nucleotide	Pyrimidine Metabolism, Cytidine containing	HMDB00089
docosahexaenoate (DHA; 22:6n3)	44675	919	0.000529739	0.315223	1	0.720779	Lipid	Polyunsaturated Fatty Acid (n3 and n6)	HMDB02183
cysteine	1868	919	0.000303303	0.315597	1	0.720779	Amino Acid	Methionine, Cysteine, SAM and Taurine Metabolism	HMDB00574
stearoyl sphingomyelin (d18:1/18:0)	19503	919	-0.00020368	0.316115	1	0.720779	Lipid	Sphingolipid Metabolism	HMDB01348
eicosapentaenoylcholine	53258	471	0.000812077	0.321951	1	0.7314	Lipid	Fatty Acid Metabolism (Acyl Choline)	NA
3-ureidopropionate	3155	833	0.000301106	0.322705	1	0.7314	Nucleotide	Pyrimidine Metabolism, Uracil containing	HMDB00026
isoeugenol sulfate	48997	243	-0.00160624	0.330639	1	0.746783	Xenobiotics	Food Component/Plant	NA
pyrraline	48428	817	-0.000618642	0.332433	1	0.746783	Xenobiotics	Food Component/Plant	HMDB33143
cinnamoylglycine	38637	853	0.00118976	0.332452	1	0.746783	Xenobiotics	Food Component/Plant	HMDB11621
dimethyl sulfone	43424	870	-0.000940377	0.333881	1	0.747774	Xenobiotics	Chemical	HMDB04983
EDTA	22163	919	-0.000106711	0.336303	1	0.750913	Xenobiotics	Chemical	HMDB15109
stearate (18:0)	1358	919	0.000212279	0.337935	1	0.750913	Lipid	Long Chain Fatty Acid	HMDB00827
glycoursodeoxycholate	39379	914	-0.00106162	0.338259	1	0.750913	Lipid	Secondary Bile Acid Metabolism	HMDB00708
1-stearoyl-2-arachidonoyl-GPC (18:0/20:4)	42450	919	-0.000165288	0.339429	1	0.750913	Lipid	Phosphatidylcholine (PC)	HMDB08048
deoxycholate	1114	892	-0.000522249	0.340242	1	0.750913	Lipid	Secondary Bile Acid Metabolism	HMDB00626
umbelliferone sulfate	48674	469	-0.00140675	0.343482	1	0.754729	Xenobiotics	Food Component/Plant	NA
alpha-CEHC glucuronide*	39346	431	-0.00142931	0.344343	1	0.754729	Cofactors and Vitamins	Tocopherol Metabolism	NA
androstenediol (3alpha, 17alpha) monosulfate (2)	37207	812	-0.000519559	0.344962	1	0.754729	Lipid	Androgenic Steroids	NA
1-palmitoyl-2-dihomo-linolenoyl-GPC (16:0/20:3n3 or 6)*	52454	919	-0.000142104	0.352031	1	0.765474	Lipid	Phosphatidylcholine (PC)	NA
4-guanidinobutanoate	15681	876	0.000534267	0.352566	1	0.765474	Amino Acid	Guanidino and Acetamido Metabolism	HMDB03464
1-palmitoyl-2-oleoyl-GPC (16:0/18:1)	52461	919	0.000160159	0.353779	1	0.765474	Lipid	Phosphatidylcholine (PC)	HMDB07972
3-carboxy-4-methyl-5-propyl-2-furanpropanoate (CMPF)	31787	919	0.00118739	0.3547	1	0.765474	Lipid	Fatty Acid, Dicarboxylate	HMDB61112
adenosine 5'-monophosphate (AMP)	32342	762	0.000764466	0.356595	1	0.765474	Nucleotide	Purine Metabolism, Adenine containing	HMDB00045
1-methylguanidine	48114	388	0.000585039	0.359287	1	0.765474	Amino Acid	Guanidino and Acetamido Metabolism	HMDB01522
isovalerylglycine	35107	669	0.000528514	0.360032	1	0.765474	Amino Acid	Leucine, Isoleucine and Valine Metabolism	HMDB00678
oleoyl-arachidonoyl-glycerol (18:1/20:4) [1]*	54960	882	-0.000510684	0.360248	1	0.765474	Lipid	Diacylglycerol	HMDB07228
2-hydroxyacetaminophen sulfate*	33173	322	-0.00313191	0.360278	1	0.765474	Xenobiotics	Drug - Analgesics, Anesthetics	NA
linoleate (18:2n6)	1105	919	-0.000352614	0.360909	1	0.765474	Lipid	Polyunsaturated Fatty Acid (n3 and n6)	HMDB00673
5-hydroxyindole sulfate	52914	416	-0.000810801	0.360997	1	0.765474	Amino Acid	Tryptophan Metabolism	NA
5alpha-pregnan-3beta,20beta-diol monosulfate (1)	37196	812	0.000671719	0.364121	1	0.768043	Lipid	Progestin Steroids	NA
N-acetylalanine	1585	919	-0.00013655	0.365353	1	0.768043	Amino Acid	Alanine and Aspartate Metabolism	HMDB00766
alpha-ketobutyrate	4968	915	0.000366381	0.366988	1	0.768043	Amino Acid	Methionine, Cysteine, SAM and Taurine Metabolism	HMDB00005
1-linoleoyl-2-linolenoyl-GPC (18:2/18:3)*	53176	881	0.000507669	0.36731	1	0.768043	Lipid	Phosphatidylcholine (PC)	HMDB08141
glycyrrhetinate	39789	190	0.00165209	0.367891	1	0.768043	Xenobiotics	Food Component/Plant	HMDB11628
thioproline	53231	919	-0.000232067	0.368859	1	0.768043	Xenobiotics	Chemical	NA
sphingomyelin (d18:1/20:1, d18:2/20:0)*	48491	919	-0.000175219	0.36972	1	0.768043	Lipid	Sphingolipid Metabolism	NA
alpha-ketoglutaramate**	62101	919	0.000202642	0.370325	1	0.768043	Amino Acid	Glutamate Metabolism	NA
dodecanedioate (C12-DC)	32388	908	0.000506992	0.374362	1	0.77214	Lipid	Fatty Acid, Dicarboxylate	HMDB00623
oleoyl-oleoyl-glycerol (18:1/18:1) [1]*	54945	856	-0.000495052	0.374917	1	0.77214	Lipid	Diacylglycerol	HMDB07218
N-acetylkynurenine (2)	48757	587	-0.000646258	0.37536	1	0.77214	Amino Acid	Tryptophan Metabolism	NA
arachidonoylcholine	53261	916	0.000543866	0.37772	1	0.774888	Lipid	Fatty Acid Metabolism (Acyl Choline)	NA
5alpha-androstan-3alpha,17beta-diol monosulfate (1)	37186	763	0.000656542	0.381317	1	0.780153	Lipid	Androgenic Steroids	NA
dihydroorotate	601	919	-0.000357769	0.383571	1	0.781187	Nucleotide	Pyrimidine Metabolism, Orotate containing	HMDB03349
erythritol	20699	919	0.000429663	0.384795	1	0.781187	Xenobiotics	Food Component/Plant	HMDB02994
tryptophan	54	919	-0.000137937	0.38527	1	0.781187	Amino Acid	Tryptophan Metabolism	HMDB00929
caffeine	569	873	-0.00114392	0.386631	1	0.781187	Xenobiotics	Xanthine Metabolism	HMDB01847
10-heptadecenoate (17:1n7)	33971	919	-0.000431486	0.388445	1	0.781187	Lipid	Long Chain Fatty Acid	HMDB60038
dihomo-linolenoyl-choline	53262	847	0.000602883	0.389018	1	0.781187	Lipid	Fatty Acid Metabolism (Acyl Choline)	NA
N-(2-furoyl)glycine	31536	684	-0.000689787	0.390605	1	0.781187	Xenobiotics	Food Component/Plant	HMDB00439
glycochenodeoxycholate sulfate	52974	831	0.000781255	0.391053	1	0.781187	Lipid	Primary Bile Acid Metabolism	NA
ethylmalonate	15765	919	-0.000339985	0.391315	1	0.781187	Amino Acid	Leucine, Isoleucine and Valine Metabolism	HMDB00622
1-palmitoyl-2-docosahexaenoyl-GPE (16:0/22:6)*	52465	919	0.000442131	0.393488	1	0.781187	Lipid	Phosphatidylethanolamine (PE)	HMDB05324
N-acetyl-S-allyl-L-cysteine	47136	213	-0.00132305	0.393695	1	0.781187	Xenobiotics	Food Component/Plant	NA
2,3-dihydroxyisovalerate	38276	913	0.000999738	0.394311	1	0.781187	Xenobiotics	Food Component/Plant	HMDB12141
3-hydroxybutyrate (BHBA)	542	919	0.00072058	0.395238	1	0.781187	Lipid	Ketone Bodies	HMDB00357
fructose	48195	919	-0.000334807	0.397618	1	0.781288	Carbohydrate	Fructose, Mannose and Galactose Metabolism	HMDB00660
sphingosine 1-phosphate	34445	919	-0.000215357	0.398988	1	0.781288	Lipid	Sphingolipid Metabolism	HMDB00277
2-hydroxyglutarate	37253	905	0.000297945	0.400334	1	0.781288	Lipid	Fatty Acid, Dicarboxylate	HMDB00606
pregnen-diol disulfate C21H34O8S2*	32562	919	0.00058801	0.402588	1	0.781288	Lipid	Pregnenolone Steroids	NA
5-hydroxyhexanoate	31938	675	-0.000583981	0.404823	1	0.781288	Lipid	Fatty Acid, Monohydroxy	HMDB00525
sphingomyelin (d18:2/16:0, d18:1/16:1)*	42459	919	-0.000132277	0.405014	1	0.781288	Lipid	Sphingolipid Metabolism	NA
1-(1-enyl-stearoyl)-2-arachidonoyl-GPE (P-18:0/20:4)*	52475	919	-0.000287793	0.405028	1	0.781288	Lipid	Plasmalogen	HMDB05779
3beta-hydroxy-5-cholestenoate	54805	919	0.000273746	0.405404	1	0.781288	Lipid	Sterol	NA
7-methylxanthine	34390	845	0.000737822	0.406822	1	0.781288	Xenobiotics	Xanthine Metabolism	HMDB01991
palmitoleate (16:1n7)	33447	919	-0.000491877	0.407064	1	0.781288	Lipid	Long Chain Fatty Acid	HMDB03229
4-hydroxy-2-oxoglutaric acid	40062	895	0.000537904	0.409108	1	0.781288	Lipid	Fatty Acid, Dicarboxylate	HMDB02070
gulonate*	46957	916	-0.000257396	0.409684	1	0.781288	Cofactors and Vitamins	Ascorbate and Aldarate Metabolism	HMDB03290
glycolithocholate	31912	663	-0.000773703	0.409809	1	0.781288	Lipid	Secondary Bile Acid Metabolism	HMDB00698
3-hydroxy-3-methylglutarate	531	915	-0.000251687	0.411443	1	0.781288	Lipid	Mevalonate Metabolism	HMDB00355
2-oxindole-3-acetate	40479	574	-0.000735331	0.412767	1	0.781288	Xenobiotics	Food Component/Plant	HMDB35514
caffeic acid sulfate	53254	482	-0.00115058	0.413673	1	0.781288	Xenobiotics	Xanthine Metabolism	HMDB41708
piperine	33935	914	0.00091053	0.414254	1	0.781288	Xenobiotics	Food Component/Plant	HMDB29377
N-acetylhistidine	33946	910	-0.000306209	0.41475	1	0.781288	Amino Acid	Histidine Metabolism	HMDB32055
sphingomyelin (d18:2/14:0, d18:1/14:1)*	47154	919	0.000247654	0.414898	1	0.781288	Lipid	Sphingolipid Metabolism	NA
indole-3-carboxylic acid	38116	784	-0.000318156	0.422019	1	0.790684	Amino Acid	Tryptophan Metabolism	HMDB03320
gluconate	587	919	-0.000235599	0.422462	1	0.790684	Xenobiotics	Food Component/Plant	HMDB00625
isovalerate (i5:0)	44656	903	-0.000341219	0.423021	1	0.790684	Amino Acid	Leucine, Isoleucine and Valine Metabolism	HMDB00718
adipoylcarnitine (C6-DC)	52988	900	-0.00044926	0.425685	1	0.792393	Lipid	Fatty Acid Metabolism(Acyl Carnitine)	HMDB61677
2'-deoxyuridine	52602	910	-0.00023842	0.426029	1	0.792393	Nucleotide	Pyrimidine Metabolism, Uracil containing	HMDB00012
arabitol/xylitol	48885	919	0.000191989	0.428874	1	0.794368	Carbohydrate	Pentose Metabolism	NA
N-acetyl-3-methylhistidine*	43256	685	0.000792242	0.429815	1	0.794368	Amino Acid	Histidine Metabolism	NA
1-palmitoyl-GPI (16:0)	35305	875	0.000489887	0.430239	1	0.794368	Lipid	Lysophospholipid	HMDB61695
N-methylpipecolate	47101	862	0.000558374	0.432632	1	0.796843	Xenobiotics	Bacterial/Fungal	NA
4-acetamidophenylglucuronide	15736	301	-0.00326141	0.435314	1	0.799837	Xenobiotics	Drug - Analgesics, Anesthetics	HMDB10316
glycine conjugate of C10H14O2 (1)*	62146	882	0.00048253	0.436906	1	0.800819	Partially Characterized Molecules	Partially Characterized Molecules	NA
anthranilate	57746	604	-0.00034634	0.43833	1	0.801488	Amino Acid	Tryptophan Metabolism	HMDB01123
3-acetylphenol sulfate	48693	346	-0.000917545	0.441296	1	0.803098	Xenobiotics	Chemical	NA
1-myristoyl-2-arachidonoyl-GPC (14:0/20:4)*	53195	919	-0.000352121	0.441333	1	0.803098	Lipid	Phosphatidylcholine (PC)	HMDB07883
xylose	15581	812	0.000287133	0.442929	1	0.80407	Carbohydrate	Pentose Metabolism	HMDB00098
N-acetyltryptophan	33959	905	-0.00030069	0.447114	1	0.809725	Amino Acid	Tryptophan Metabolism	HMDB13713
5-oxoproline	1494	919	0.000125885	0.449963	1	0.811517	Amino Acid	Glutathione Metabolism	HMDB00267
3-methylxanthine	32445	880	0.000648369	0.45291	1	0.811517	Xenobiotics	Xanthine Metabolism	HMDB01886
4-acetamidobutanoate	1558	912	0.000279744	0.454249	1	0.811517	Amino Acid	Polyamine Metabolism	HMDB03681
2-hydroxystearate	17945	919	0.000163255	0.454783	1	0.811517	Lipid	Fatty Acid, Monohydroxy	NA
gamma-glutamylhistidine	18245	919	-0.000155258	0.45524	1	0.811517	Peptide	Gamma-glutamyl Amino Acid	NA
urea	1670	919	0.000191361	0.45621	1	0.811517	Amino Acid	Urea cycle; Arginine and Proline Metabolism	HMDB00294
5-dodecenoate (12:1n7)	33968	918	0.000395398	0.456525	1	0.811517	Lipid	Medium Chain Fatty Acid	HMDB00529
1-(1-enyl-palmitoyl)-2-linoleoyl-GPE (P-16:0/18:2)*	52677	918	-0.000279071	0.456679	1	0.811517	Lipid	Plasmalogen	HMDB11343
pro-hydroxy-pro	35127	918	0.000264199	0.463075	1	0.820954	Amino Acid	Urea cycle; Arginine and Proline Metabolism	HMDB06695
dimethyl sulfoxide (DMSO)	48404	857	0.000324289	0.465556	1	0.822388	Xenobiotics	Chemical	HMDB02151
gamma-tocopherol/beta-tocopherol	52473	919	-0.000396712	0.466056	1	0.822388	Cofactors and Vitamins	Tocopherol Metabolism	NA
1-palmitoyl-2-arachidonoyl-GPE (16:0/20:4)*	52464	919	0.000292882	0.469944	1	0.826883	Lipid	Phosphatidylethanolamine (PE)	HMDB05323
homoarginine	22137	919	-0.000262175	0.470788	1	0.826883	Amino Acid	Urea cycle; Arginine and Proline Metabolism	HMDB00670
hexanoylcarnitine (C6)	32328	919	-0.00033111	0.478703	1	0.838839	Lipid	Fatty Acid Metabolism(Acyl Carnitine)	HMDB00705
pentadecanoate (15:0)	1361	919	-0.000202315	0.482226	1	0.83967	Lipid	Long Chain Fatty Acid	HMDB00826
glycochenodeoxycholate glucuronide (1)	52983	894	-0.000618119	0.482534	1	0.83967	Lipid	Primary Bile Acid Metabolism	NA
docosadioate (C22-DC)	39837	917	0.000321717	0.483858	1	0.83967	Lipid	Fatty Acid, Dicarboxylate	NA
adrenate (22:4n6)	32980	903	-0.000346345	0.484302	1	0.83967	Lipid	Polyunsaturated Fatty Acid (n3 and n6)	HMDB02226
4-hydroxycoumarin	37445	724	0.000710466	0.48495	1	0.83967	Xenobiotics	Drug - Cardiovascular	NA
asparagine	512	919	9.04143e-05	0.492361	1	0.83967	Amino Acid	Alanine and Aspartate Metabolism	HMDB00168
dihydroferulic acid	40481	345	0.000800558	0.492498	1	0.83967	Xenobiotics	Food Component/Plant	NA
dihomo-linoleate (20:2n6)	17805	919	0.000309693	0.492719	1	0.83967	Lipid	Polyunsaturated Fatty Acid (n3 and n6)	HMDB05060
5alpha-androstan-3alpha,17beta-diol disulfate	37184	396	0.000820854	0.494446	1	0.83967	Lipid	Androgenic Steroids	NA
eicosenoate (20:1)	33587	919	0.000323548	0.495214	1	0.83967	Lipid	Long Chain Fatty Acid	HMDB02231
3-methyl-2-oxovalerate	15676	919	-0.000144181	0.496584	1	0.83967	Amino Acid	Leucine, Isoleucine and Valine Metabolism	HMDB03736
chenodeoxycholate	1563	550	-0.000502745	0.499246	1	0.83967	Lipid	Primary Bile Acid Metabolism	HMDB00518
sphingomyelin (d18:2/24:2)*	57479	919	-0.000189951	0.500067	1	0.83967	Lipid	Sphingolipid Metabolism	NA
dihomo-linolenate (20:3n3 or n6)	35718	919	0.000233994	0.501236	1	0.83967	Lipid	Polyunsaturated Fatty Acid (n3 and n6)	HMDB02925
1-arachidonylglycerol (20:4)	34397	725	0.000381241	0.501948	1	0.83967	Lipid	Monoacylglycerol	HMDB11549
glutamate, gamma-methyl ester	33487	840	-0.000214589	0.502907	1	0.83967	Amino Acid	Glutamate Metabolism	HMDB61715
etiocholanolone glucuronide	47112	862	0.000457796	0.503268	1	0.83967	Lipid	Androgenic Steroids	HMDB04484
gamma-glutamylglycine	33949	919	-0.000181616	0.507033	1	0.83967	Peptide	Gamma-glutamyl Amino Acid	HMDB11667
glyco-beta-muricholate**	62066	754	-0.000641122	0.509954	1	0.83967	Lipid	Primary Bile Acid Metabolism	NA
quinate	18335	907	-0.00103448	0.510172	1	0.83967	Xenobiotics	Food Component/Plant	HMDB03072
theophylline	18394	864	-0.000666571	0.51216	1	0.83967	Xenobiotics	Xanthine Metabolism	HMDB01889
oleoyl ethanolamide	38102	911	0.000253551	0.514471	1	0.83967	Lipid	Endocannabinoid	HMDB02088
threonate	27738	919	0.000296726	0.514731	1	0.83967	Cofactors and Vitamins	Ascorbate and Aldarate Metabolism	HMDB00943
catechol sulfate	35320	919	0.000409535	0.515594	1	0.83967	Xenobiotics	Benzoate Metabolism	HMDB59724
phosphoethanolamine	1600	916	0.000269014	0.517435	1	0.83967	Lipid	Phospholipid Metabolism	HMDB00224
methylsuccinate	15745	908	-0.000209551	0.518369	1	0.83967	Amino Acid	Leucine, Isoleucine and Valine Metabolism	HMDB01844
saccharin	21151	513	-0.0010041	0.518434	1	0.83967	Xenobiotics	Food Component/Plant	HMDB29723
3-methylcytidine	35132	915	0.000164222	0.518516	1	0.83967	Nucleotide	Pyrimidine Metabolism, Cytidine containing	NA
1-arachidonoyl-GPE (20:4n6)*	35186	919	0.000164209	0.520695	1	0.83967	Lipid	Lysophospholipid	HMDB11517
trans-urocanate	607	911	-0.000292841	0.522699	1	0.83967	Amino Acid	Histidine Metabolism	HMDB00301
3-(3-hydroxyphenyl)propionate	35635	525	0.000765024	0.524306	1	0.83967	Xenobiotics	Benzoate Metabolism	HMDB00375
kynurenine	15140	919	-0.000148622	0.524609	1	0.83967	Amino Acid	Tryptophan Metabolism	HMDB00684
caproate (6:0)	32489	915	0.000251001	0.524882	1	0.83967	Lipid	Medium Chain Fatty Acid	HMDB00535
cysteinylglycine disulfide*	62103	919	0.000113709	0.528449	1	0.83967	Amino Acid	Glutathione Metabolism	HMDB00709
theobromine	18392	909	0.000604219	0.528715	1	0.83967	Xenobiotics	Xanthine Metabolism	HMDB02825
10-nonadecenoate (19:1n9)	33972	919	0.000296765	0.528952	1	0.83967	Lipid	Long Chain Fatty Acid	HMDB13622
thyroxine	2761	918	-0.000134226	0.529125	1	0.83967	Amino Acid	Tyrosine Metabolism	HMDB01918
corticosterone	5983	487	0.000502117	0.529373	1	0.83967	Lipid	Corticosteroids	HMDB01547
methylsuccinoylcarnitine	53031	638	0.000439616	0.529796	1	0.83967	Amino Acid	Leucine, Isoleucine and Valine Metabolism	NA
arachidonate (20:4n6)	1110	919	0.000211086	0.530963	1	0.83967	Lipid	Polyunsaturated Fatty Acid (n3 and n6)	HMDB01043
1-stearoyl-GPI (18:0)	19324	919	0.000304085	0.531051	1	0.83967	Lipid	Lysophospholipid	HMDB61696
1-palmitoyl-2-oleoyl-GPI (16:0/18:1)*	52669	898	0.000251544	0.532969	1	0.83967	Lipid	Phosphatidylinositol (PI)	HMDB09783
hypoxanthine	3127	919	-0.000307425	0.533498	1	0.83967	Nucleotide	Purine Metabolism, (Hypo)Xanthine/Inosine containing	HMDB00157
octadecenedioylcarnitine (C18:1-DC)*	61865	918	-0.000334304	0.533985	1	0.83967	Lipid	Fatty Acid Metabolism(Acyl Carnitine)	NA
1,5-anhydroglucitol (1,5-AG)	20675	919	-0.000251349	0.534339	1	0.83967	Carbohydrate	Glycolysis, Gluconeogenesis, and Pyruvate Metabolism	HMDB02712
5alpha-pregnan-3beta,20alpha-diol monosulfate (2)	37200	880	0.000479818	0.535706	1	0.83967	Lipid	Progestin Steroids	NA
4-acetamidophenol	12032	176	0.00284381	0.536522	1	0.83967	Xenobiotics	Drug - Analgesics, Anesthetics	HMDB01859
3-methyl-2-oxobutyrate	44526	919	-0.000114693	0.536607	1	0.83967	Amino Acid	Leucine, Isoleucine and Valine Metabolism	HMDB00019
ferulic acid 4-sulfate	47114	186	-0.00124405	0.536702	1	0.83967	Xenobiotics	Food Component/Plant	HMDB29200
lanthionine	42002	642	0.000390362	0.536833	1	0.83967	Xenobiotics	Chemical	NA
glycosyl-N-stearoyl-sphingosine (d18:1/18:0)	52234	918	0.000191828	0.537001	1	0.83967	Lipid	Ceramides	NA
2-hydroxybutyrate/2-hydroxyisobutyrate	52281	919	0.000220526	0.538895	1	0.83967	Amino Acid	Glutathione Metabolism	NA
13-HODE + 9-HODE	37752	905	0.000288741	0.539451	1	0.83967	Lipid	Fatty Acid, Monohydroxy	NA
3-(3-hydroxyphenyl)propionate sulfate	45415	642	0.000635867	0.539697	1	0.83967	Xenobiotics	Benzoate Metabolism	NA
glucuronide of C10H18O2 (1)*	61881	235	0.00103473	0.541511	1	0.83967	Partially Characterized Molecules	Partially Characterized Molecules	NA
hydroquinone sulfate	35322	684	-0.000533672	0.542145	1	0.83967	Xenobiotics	Drug - Topical Agents	HMDB02434
5,6-dihydrouracil	1559	460	-0.00026328	0.543124	1	0.83967	Nucleotide	Pyrimidine Metabolism, Uracil containing	HMDB00076
nervonoylcarnitine (C24:1)*	57531	902	0.000199512	0.54458	1	0.83967	Lipid	Fatty Acid Metabolism(Acyl Carnitine)	NA
16-hydroxypalmitate	39609	919	0.000221293	0.544621	1	0.83967	Lipid	Fatty Acid, Monohydroxy	HMDB06294
glutamine	53	919	-6.23146e-05	0.548381	1	0.843749	Amino Acid	Glutamate Metabolism	HMDB00641
heptanoate (7:0)	1644	723	0.000273684	0.551099	1	0.845625	Lipid	Medium Chain Fatty Acid	HMDB00666
malonylcarnitine	37059	719	-0.000254516	0.551834	1	0.845625	Lipid	Fatty Acid Synthesis	HMDB02095
N-palmitoylglycine	42092	917	-0.000187564	0.553208	1	0.846017	Lipid	Fatty Acid Metabolism(Acyl Glycine)	HMDB13034
trigonelline (N'-methylnicotinate)	32401	919	-0.000553268	0.557045	1	0.848818	Cofactors and Vitamins	Nicotinate and Nicotinamide Metabolism	HMDB00875
4-vinylguaiacol sulfate	48442	238	-0.001071	0.558157	1	0.848818	Xenobiotics	Food Component/Plant	NA
N-oleoylserine	57664	818	0.000227565	0.558403	1	0.848818	Lipid	Endocannabinoid	NA
galactonate	27719	758	0.000553873	0.560043	1	0.849293	Carbohydrate	Fructose, Mannose and Galactose Metabolism	HMDB00565
O-sulfo-L-tyrosine	45413	919	-0.000172705	0.56096	1	0.849293	Xenobiotics	Chemical	NA
gamma-glutamylalanine	37063	913	-0.00027842	0.562999	1	0.850679	Peptide	Gamma-glutamyl Amino Acid	HMDB29142
3-methylglutaconate	57747	919	0.000247284	0.565346	1	0.85156	Amino Acid	Leucine, Isoleucine and Valine Metabolism	HMDB00522
N6-acetyllysine	36752	919	0.000140477	0.565832	1	0.85156	Amino Acid	Lysine Metabolism	HMDB00206
sphinganine	17769	681	-0.000256246	0.567221	1	0.851957	Lipid	Sphingolipid Metabolism	HMDB00269
2-hydroxyoctanoate	22036	897	-0.000291287	0.569541	1	0.853748	Lipid	Fatty Acid, Monohydroxy	HMDB02264
pipecolate	1444	918	0.000308733	0.575357	1	0.859755	Amino Acid	Lysine Metabolism	HMDB00070
1-arachidonoyl-GPI (20:4)*	34214	919	-0.000191539	0.577081	1	0.859755	Lipid	Lysophospholipid	HMDB61690
acesulfame	48569	451	0.00148141	0.577316	1	0.859755	Xenobiotics	Food Component/Plant	HMDB33585
lignoceroylcarnitine (C24)*	57515	919	0.000202706	0.578091	1	0.859755	Lipid	Fatty Acid Metabolism(Acyl Carnitine)	NA
cys-gly, oxidized	18368	873	0.000199882	0.581383	1	0.860276	Amino Acid	Glutathione Metabolism	NA
3-methylhistidine	15677	912	-0.00066739	0.582709	1	0.860276	Amino Acid	Histidine Metabolism	HMDB00479
1,2-dilinoleoyl-GPC (18:2/18:2)	52603	918	0.000168653	0.583006	1	0.860276	Lipid	Phosphatidylcholine (PC)	HMDB08138
ribitol	15772	905	-0.000133043	0.583155	1	0.860276	Carbohydrate	Pentose Metabolism	HMDB00508
ectoine	35651	858	0.000480453	0.584124	1	0.860276	Xenobiotics	Chemical	NA
sphingomyelin (d18:1/19:0, d19:1/18:0)*	57475	919	0.000143223	0.585301	1	0.860335	Lipid	Sphingolipid Metabolism	NA
sphingomyelin (d18:1/17:0, d17:1/18:0, d19:1/16:0)	52615	919	0.000119207	0.586763	1	0.860813	Lipid	Sphingolipid Metabolism	NA
3-hydroxystachydrine*	62062	728	0.000884265	0.589828	1	0.863636	Xenobiotics	Food Component/Plant	NA
N-acetylalliin	45404	691	-0.000627952	0.592028	1	0.865184	Xenobiotics	Food Component/Plant	NA
ceramide (d18:2/24:1, d18:1/24:2)*	57443	919	-0.000156187	0.593472	1	0.865623	Lipid	Ceramides	NA
perfluorooctanesulfonic acid (PFOS)	57564	919	-0.000338339	0.598164	1	0.870496	Xenobiotics	Chemical	HMDB59586
cysteinylglycine	35637	901	0.000274188	0.600288	1	0.870496	Amino Acid	Glutathione Metabolism	HMDB00078
15-methylpalmitate (i17:0)	38768	884	0.000213828	0.600959	1	0.870496	Lipid	Fatty Acid, Branched	NA
2-aminophenol sulfate	43266	905	0.000524	0.602326	1	0.870496	Xenobiotics	Chemical	HMDB61116
3-hydroxypyridine sulfate	48448	910	0.000584394	0.602563	1	0.870496	Xenobiotics	Chemical	NA
isoursodeoxycholate	57577	911	-0.000589937	0.60734	1	0.873259	Lipid	Secondary Bile Acid Metabolism	HMDB00686
5alpha-androstan-3alpha,17beta-diol 17-glucuronide	47132	282	-0.000477573	0.608583	1	0.873259	Lipid	Androgenic Steroids	NA
taurochenodeoxycholate	18494	855	-0.000561615	0.608812	1	0.873259	Lipid	Primary Bile Acid Metabolism	HMDB00951
1-palmitoyl-2-stearoyl-GPC (16:0/18:0)	52616	917	0.000136673	0.610269	1	0.873259	Lipid	Phosphatidylcholine (PC)	HMDB07970
kynurenate	1417	919	0.000170224	0.610772	1	0.873259	Amino Acid	Tryptophan Metabolism	HMDB00715
succinate	1437	918	-0.000372621	0.611397	1	0.873259	Energy	TCA Cycle	HMDB00254
1-stearoyl-2-docosahexaenoyl-GPC (18:0/22:6)	52611	919	-0.000173878	0.613804	1	0.875046	Lipid	Phosphatidylcholine (PC)	HMDB08057
gamma-glutamylglutamine	2730	919	0.000101349	0.615171	1	0.875347	Peptide	Gamma-glutamyl Amino Acid	HMDB11738
sphingomyelin (d18:0/18:0, d19:0/17:0)*	57473	919	-0.000206236	0.617311	1	0.875695	Lipid	Sphingolipid Metabolism	HMDB12087
methionine sulfoxide	18374	919	-0.000103831	0.617729	1	0.875695	Amino Acid	Methionine, Cysteine, SAM and Taurine Metabolism	HMDB02005
orotate	1505	919	-0.000180367	0.624719	1	0.883948	Nucleotide	Pyrimidine Metabolism, Orotate containing	HMDB00226
taurocholate	18497	705	-0.000680847	0.626756	1	0.885075	Lipid	Primary Bile Acid Metabolism	HMDB00036
hexadecenedioate (C16:1-DC)*	61862	898	-0.00023801	0.628608	1	0.885075	Lipid	Fatty Acid, Dicarboxylate	NA
eicosanodioate (C20-DC)	39831	919	0.000220115	0.63128	1	0.885075	Lipid	Fatty Acid, Dicarboxylate	NA
4-hydroxyhippurate	35527	919	-0.000325122	0.631537	1	0.885075	Xenobiotics	Benzoate Metabolism	HMDB13678
5-(galactosylhydroxy)-L-lysine	43582	917	-0.000143875	0.635348	1	0.885075	Amino Acid	Lysine Metabolism	NA
1-oleoylglycerol (18:1)	21184	893	-0.000247314	0.636669	1	0.885075	Lipid	Monoacylglycerol	HMDB11567
(N(1) + N(8))-acetylspermidine	57814	840	-0.000175266	0.636883	1	0.885075	Amino Acid	Polyamine Metabolism	NA
3,4-methyleneheptanoylcarnitine	52929	577	-0.000352979	0.637305	1	0.885075	Lipid	Fatty Acid Metabolism(Acyl Carnitine)	NA
glutarate (C5-DC)	396	866	-0.000320861	0.637478	1	0.885075	Lipid	Fatty Acid, Dicarboxylate	HMDB00661
glyco-alpha-muricholate**	62065	442	-0.000466065	0.638338	1	0.885075	Lipid	Primary Bile Acid Metabolism	NA
methyl indole-3-acetate	1584	766	0.000293015	0.638706	1	0.885075	Xenobiotics	Food Component/Plant	HMDB29738
N-trimethyl 5-aminovalerate	57687	919	-0.000178236	0.641036	1	0.885075	Amino Acid	Lysine Metabolism	NA
fumarate	1643	916	0.000172969	0.64159	1	0.885075	Energy	TCA Cycle	HMDB00134
1-palmitoyl-2-linoleoyl-GPI (16:0/18:2)	52450	898	-0.000184165	0.642847	1	0.885075	Lipid	Phosphatidylinositol (PI)	HMDB09784
1-methylxanthine	34389	795	0.000413251	0.643053	1	0.885075	Xenobiotics	Xanthine Metabolism	HMDB10738
palmitoylcarnitine (C16)	44681	919	0.000117654	0.644837	1	0.88592	Lipid	Fatty Acid Metabolism(Acyl Carnitine)	HMDB00222
glycerol 3-phosphate	43847	896	0.000154338	0.64926	1	0.888792	Lipid	Glycerolipid Metabolism	HMDB00126
retinol (Vitamin A)	1806	919	0.000100616	0.650103	1	0.888792	Cofactors and Vitamins	Vitamin A Metabolism	HMDB00305
N-palmitoyl-sphinganine (d18:0/16:0)	52604	906	-0.000168498	0.65045	1	0.888792	Lipid	Sphingolipid Metabolism	HMDB11760
myristate (14:0)	1365	919	-0.00019358	0.656176	1	0.894104	Lipid	Long Chain Fatty Acid	HMDB00806
glycolithocholate sulfate*	32620	919	-0.000375917	0.658342	1	0.894104	Lipid	Secondary Bile Acid Metabolism	HMDB02639
glucuronate	15443	919	0.000244892	0.660013	1	0.894104	Carbohydrate	Aminosugar Metabolism	HMDB00127
12,13-DiHOME	38395	692	0.000230904	0.66078	1	0.894104	Lipid	Fatty Acid, Dihydroxy	HMDB04705
sphingomyelin (d18:1/22:2, d18:2/22:1, d16:1/24:2)*	57477	919	-0.000116609	0.661291	1	0.894104	Lipid	Sphingolipid Metabolism	NA
glycodeoxycholate sulfate	52975	865	0.000420704	0.661424	1	0.894104	Lipid	Secondary Bile Acid Metabolism	NA
carboxyethyl-GABA	40007	906	0.00013024	0.664256	1	0.894773	Amino Acid	Glutamate Metabolism	HMDB02201
N1-Methyl-2-pyridone-5-carboxamide	40469	919	-0.000195824	0.664283	1	0.894773	Cofactors and Vitamins	Nicotinate and Nicotinamide Metabolism	HMDB04193
margaroylcarnitine (C17)*	57512	910	0.000163115	0.667171	1	0.895499	Lipid	Fatty Acid Metabolism(Acyl Carnitine)	HMDB06210
N-acetylisoleucine	33967	870	-0.000115529	0.667904	1	0.895499	Amino Acid	Leucine, Isoleucine and Valine Metabolism	HMDB61684
beta-hydroxyisovalerate	12129	919	0.000127775	0.668371	1	0.895499	Amino Acid	Leucine, Isoleucine and Valine Metabolism	HMDB00754
N-methylhydroxyproline**	62068	703	0.000447607	0.670019	1	0.896121	Amino Acid	Urea cycle; Arginine and Proline Metabolism	NA
acetoacetate	33963	695	0.000332168	0.67121	1	0.89613	Lipid	Ketone Bodies	HMDB00060
gamma-glutamylthreonine	33364	919	-0.000119952	0.674676	1	0.896561	Peptide	Gamma-glutamyl Amino Acid	HMDB29159
carnitine	15500	919	-7.15529e-05	0.674813	1	0.896561	Lipid	Carnitine Metabolism	HMDB00062
pyroglutamine*	46225	919	-0.000193433	0.676408	1	0.896561	Amino Acid	Glutamate Metabolism	NA
indoleacetylglutamine	42087	740	0.000329838	0.676411	1	0.896561	Amino Acid	Tryptophan Metabolism	HMDB13240
9,10-DiHOME	38399	554	-0.000237925	0.677455	1	0.896561	Lipid	Fatty Acid, Dihydroxy	HMDB04704
S-methylcysteine sulfoxide	43378	919	-0.000251291	0.679221	1	0.897331	Amino Acid	Methionine, Cysteine, SAM and Taurine Metabolism	HMDB29432
androstenediol (3beta,17beta) disulfate (2)	37203	917	0.000269811	0.681259	1	0.898455	Lipid	Androgenic Steroids	HMDB03818
1-oleoyl-2-docosahexaenoyl-GPC (18:1/22:6)*	52697	919	-0.000108299	0.684534	1	0.898933	Lipid	Phosphatidylcholine (PC)	HMDB08123
N-acetylglutamate	15720	868	0.000200365	0.685399	1	0.898933	Amino Acid	Glutamate Metabolism	HMDB01138
oleate/vaccenate (18:1)	52285	919	-0.000148587	0.687317	1	0.898933	Lipid	Long Chain Fatty Acid	NA
paraxanthine	18254	790	0.000351479	0.687964	1	0.898933	Xenobiotics	Xanthine Metabolism	HMDB01860
1-palmitoyl-2-palmitoleoyl-GPC (16:0/16:1)*	52470	919	-0.000161212	0.688263	1	0.898933	Lipid	Phosphatidylcholine (PC)	HMDB07969
mannose	48153	919	8.15364e-05	0.689769	1	0.898933	Carbohydrate	Fructose, Mannose and Galactose Metabolism	HMDB00169
N-acetylarginine	33953	919	0.00014361	0.689934	1	0.898933	Amino Acid	Urea cycle; Arginine and Proline Metabolism	HMDB04620
behenoylcarnitine (C22)*	57514	841	-0.000182285	0.693895	1	0.902422	Lipid	Fatty Acid Metabolism(Acyl Carnitine)	NA
sphingosine	17747	860	-0.000189802	0.694996	1	0.902422	Lipid	Sphingolipid Metabolism	HMDB00252
N6,N6,N6-trimethyllysine	1498	919	-0.000141047	0.700461	1	0.903477	Amino Acid	Lysine Metabolism	HMDB01325
N-acetylasparagine	33942	919	0.000138598	0.701989	1	0.903477	Amino Acid	Alanine and Aspartate Metabolism	HMDB06028
N-acetylglucosaminylasparagine	48149	847	-0.000135746	0.702039	1	0.903477	Carbohydrate	Aminosugar Metabolism	HMDB00489
1-(1-enyl-stearoyl)-2-oleoyl-GPE (P-18:0/18:1)	52614	916	0.000146563	0.703393	1	0.903477	Lipid	Plasmalogen	HMDB11375
solanidine	39788	321	-0.000708278	0.703638	1	0.903477	Xenobiotics	Food Component/Plant	HMDB03236
homostachydrine*	33009	882	-0.000234095	0.703639	1	0.903477	Xenobiotics	Food Component/Plant	HMDB33433
N-acetyltyrosine	32390	833	-0.000154503	0.704163	1	0.903477	Amino Acid	Tyrosine Metabolism	HMDB00866
1-(1-enyl-stearoyl)-2-linoleoyl-GPE (P-18:0/18:2)*	52748	919	-0.000121289	0.705472	1	0.903625	Lipid	Plasmalogen	HMDB11376
caprylate (8:0)	32492	830	0.000179116	0.70685	1	0.903861	Lipid	Medium Chain Fatty Acid	HMDB00482
1-stearoyl-2-linoleoyl-GPI (18:0/18:2)	52468	918	0.000129311	0.708765	1	0.904781	Lipid	Phosphatidylinositol (PI)	HMDB09809
1-myristoyl-2-palmitoyl-GPC (14:0/16:0)	19258	919	0.000181809	0.710775	1	0.905269	Lipid	Phosphatidylcholine (PC)	HMDB07869
2-linoleoylglycerol (18:2)	32506	540	-0.000238085	0.712063	1	0.905269	Lipid	Monoacylglycerol	HMDB11538
1-(1-enyl-palmitoyl)-2-oleoyl-GPE (P-16:0/18:1)*	52477	916	0.00011555	0.714155	1	0.905269	Lipid	Plasmalogen	HMDB11342
gamma-glutamyltryptophan	33947	685	-0.000130733	0.716832	1	0.905269	Peptide	Gamma-glutamyl Amino Acid	HMDB29160
5-acetylamino-6-amino-3-methyluracil	34424	895	-0.000391483	0.718473	1	0.905269	Xenobiotics	Xanthine Metabolism	HMDB04400
3-hydroxyadipate*	62069	808	0.000196923	0.720181	1	0.905269	Lipid	Fatty Acid, Dicarboxylate	HMDB00345
cis-4-decenoylcarnitine (C10:1)	38178	919	-0.000163116	0.720205	1	0.905269	Lipid	Fatty Acid Metabolism(Acyl Carnitine)	NA
myristoleate (14:1n5)	32418	919	-0.000190165	0.721712	1	0.905269	Lipid	Long Chain Fatty Acid	HMDB02000
N-acetylglutamine	33943	910	0.000142428	0.721731	1	0.905269	Amino Acid	Glutamate Metabolism	HMDB06029
glycine conjugate of C10H12O2*	62145	653	-0.000233656	0.723163	1	0.905269	Partially Characterized Molecules	Partially Characterized Molecules	NA
sphingomyelin (d18:0/20:0, d16:0/22:0)*	57476	919	0.000148083	0.725315	1	0.905269	Lipid	Sphingolipid Metabolism	NA
ribulonate/xylulonate*	61858	914	-0.000138569	0.725585	1	0.905269	Carbohydrate	Pentose Metabolism	NA
2-hydroxypalmitate	35675	919	8.03203e-05	0.725821	1	0.905269	Lipid	Fatty Acid, Monohydroxy	HMDB31057
1-ribosyl-imidazoleacetate*	61868	919	-0.000120483	0.728003	1	0.905269	Amino Acid	Histidine Metabolism	HMDB02331
linolenate [alpha or gamma; (18:3n3 or 6)]	34035	919	-0.000177345	0.731455	1	0.905269	Lipid	Polyunsaturated Fatty Acid (n3 and n6)	HMDB03073
adrenoylcarnitine (C22:4)*	57528	552	-0.000155022	0.731962	1	0.905269	Lipid	Fatty Acid Metabolism(Acyl Carnitine)	NA
bilirubin (E,E)*	32586	919	0.000168975	0.732228	1	0.905269	Cofactors and Vitamins	Hemoglobin and Porphyrin Metabolism	NA
1,3,7-trimethylurate	34404	709	-0.000362518	0.732434	1	0.905269	Xenobiotics	Xanthine Metabolism	HMDB02123
adenine	554	916	0.000107003	0.735034	1	0.905269	Nucleotide	Purine Metabolism, Adenine containing	HMDB00034
octadecenedioate (C18:1-DC)*	61861	919	0.000161162	0.736035	1	0.905269	Lipid	Fatty Acid, Dicarboxylate	NA
choline	15506	919	-5.92456e-05	0.736119	1	0.905269	Lipid	Phospholipid Metabolism	HMDB00097
phenylpyruvate	566	885	-0.00010609	0.736526	1	0.905269	Amino Acid	Phenylalanine Metabolism	HMDB00205
1-oleoyl-2-docosahexaenoyl-GPE (18:1/22:6)*	53209	728	0.000228838	0.737609	1	0.905269	Lipid	Phosphatidylethanolamine (PE)	NA
stearoyl ethanolamide	38625	919	0.000113123	0.737848	1	0.905269	Lipid	Endocannabinoid	HMDB13078
salicyluric glucuronide*	33384	561	0.000729983	0.743547	1	0.909264	Xenobiotics	Drug - Analgesics, Anesthetics	NA
tetradecanedioate (C14-DC)	35669	907	-0.000177577	0.74379	1	0.909264	Lipid	Fatty Acid, Dicarboxylate	HMDB00872
laurylcarnitine (C12)	34534	919	0.000158949	0.746021	1	0.909264	Lipid	Fatty Acid Metabolism(Acyl Carnitine)	HMDB02250
androsterone glucuronide	61846	880	0.000209836	0.746518	1	0.909264	Lipid	Androgenic Steroids	HMDB02829
cysteine s-sulfate	22176	919	0.000136472	0.74711	1	0.909264	Amino Acid	Methionine, Cysteine, SAM and Taurine Metabolism	HMDB00731
oleoyl-oleoyl-glycerol (18:1/18:1) [2]*	54946	915	-0.000175545	0.748332	1	0.909289	Lipid	Diacylglycerol	HMDB07218
1,2,3-benzenetriol sulfate (2)	48762	565	0.000553746	0.755427	1	0.915116	Xenobiotics	Chemical	NA
maltotriose	44688	268	-0.000715024	0.756124	1	0.915116	Carbohydrate	Glycogen Metabolism	HMDB01262
21-hydroxypregnenolone disulfate	46115	911	0.000188048	0.756754	1	0.915116	Lipid	Pregnenolone Steroids	NA
1-methylnicotinamide	27665	919	-0.00015134	0.762161	1	0.919036	Cofactors and Vitamins	Nicotinate and Nicotinamide Metabolism	HMDB00699
1H-indole-7-acetic acid	57783	861	0.000194596	0.762423	1	0.919036	Xenobiotics	Bacterial/Fungal	NA
sulfate*	46960	919	4.79662e-05	0.767745	1	0.92398	Xenobiotics	Chemical	HMDB01448
1-palmitoleoyl-2-linolenoyl-GPC (16:1/18:3)*	53180	686	0.00015138	0.770293	1	0.924091	Lipid	Phosphatidylcholine (PC)	HMDB08008
sarcosine	1516	919	6.82126e-05	0.770565	1	0.924091	Amino Acid	Glycine, Serine and Threonine Metabolism	HMDB00271
sphingomyelin (d17:2/16:0, d18:2/15:0)*	57483	919	8.66785e-05	0.7715	1	0.924091	Lipid	Sphingolipid Metabolism	NA
docosapentaenoate (n6 DPA; 22:5n6)	37478	851	0.00011487	0.774076	1	0.925711	Lipid	Polyunsaturated Fatty Acid (n3 and n6)	HMDB01976
oleoyl-arachidonoyl-glycerol (18:1/20:4) [2]*	54961	874	-0.000153791	0.77629	1	0.926561	Lipid	Diacylglycerol	HMDB07228
isobutyrylcarnitine (C4)	33441	919	-0.000136398	0.777894	1	0.926561	Amino Acid	Leucine, Isoleucine and Valine Metabolism	HMDB00736
glycine	58	919	-6.09704e-05	0.778458	1	0.926561	Amino Acid	Glycine, Serine and Threonine Metabolism	HMDB00123
pseudouridine	33442	919	5.62795e-05	0.781529	1	0.92727	Nucleotide	Pyrimidine Metabolism, Uracil containing	HMDB00767
N-acetylcarnosine	43488	919	-0.000107734	0.782061	1	0.92727	Amino Acid	Histidine Metabolism	HMDB12881
5-dodecenoylcarnitine (C12:1)	61769	919	0.000118819	0.783602	1	0.92727	Lipid	Fatty Acid Metabolism(Acyl Carnitine)	NA
linoleoylcarnitine (C18:2)*	46223	919	7.80015e-05	0.783953	1	0.92727	Lipid	Fatty Acid Metabolism(Acyl Carnitine)	HMDB06469
1-palmitoyl-2-arachidonoyl-GPC (16:0/20:4n6)	52462	919	-5.03762e-05	0.786585	1	0.928608	Lipid	Phosphatidylcholine (PC)	HMDB07982
arabonate/xylonate	48255	919	8.13723e-05	0.790355	1	0.928608	Carbohydrate	Pentose Metabolism	NA
acisoga	43258	763	-0.000138677	0.790439	1	0.928608	Amino Acid	Polyamine Metabolism	NA
N-formylphenylalanine	48433	681	0.000115944	0.790561	1	0.928608	Amino Acid	Tyrosine Metabolism	NA
N-acetyltaurine	48187	894	-0.000119608	0.791218	1	0.928608	Amino Acid	Methionine, Cysteine, SAM and Taurine Metabolism	NA
N-acetyl-beta-alanine	37432	906	6.58107e-05	0.796126	1	0.932922	Nucleotide	Pyrimidine Metabolism, Uracil containing	NA
1-stearoyl-2-oleoyl-GPG (18:0/18:1)	52623	913	8.58526e-05	0.800563	1	0.935215	Lipid	Phosphatidylglycerol (PG)	NA
sphingomyelin (d18:2/23:1)*	57482	919	-7.1215e-05	0.801517	1	0.935215	Lipid	Sphingolipid Metabolism	NA
serotonin	2342	437	-0.000399641	0.801789	1	0.935215	Amino Acid	Tryptophan Metabolism	HMDB00259
N-acetylvaline	1591	917	5.12436e-05	0.803222	1	0.935272	Amino Acid	Leucine, Isoleucine and Valine Metabolism	HMDB11757
1-stearoyl-2-oleoyl-GPE (18:0/18:1)	42448	919	-0.000118795	0.804584	1	0.935272	Lipid	Phosphatidylethanolamine (PE)	HMDB08993
xanthurenate	15679	840	0.000139368	0.806569	1	0.935272	Amino Acid	Tryptophan Metabolism	HMDB00881
octadecanedioate (C18-DC)	36754	873	-0.000119611	0.80678	1	0.935272	Lipid	Fatty Acid, Dicarboxylate	HMDB00782
phosphate	42109	919	5.80569e-05	0.808434	1	0.935756	Energy	Oxidative Phosphorylation	HMDB01429
N-carbamoylalanine	52340	585	-0.00015764	0.813421	1	0.938898	Amino Acid	Alanine and Aspartate Metabolism	NA
6-oxopiperidine-2-carboxylate	43231	802	0.000107691	0.813629	1	0.938898	Amino Acid	Lysine Metabolism	HMDB61705
alpha-ketoglutarate	528	919	7.76228e-05	0.822656	1	0.947748	Energy	TCA Cycle	HMDB00208
myristoylcarnitine (C14)	33952	919	8.38393e-05	0.823802	1	0.947748	Lipid	Fatty Acid Metabolism(Acyl Carnitine)	HMDB05066
17alpha-hydroxypregnenolone 3-sulfate	37482	199	0.000228454	0.825228	1	0.947948	Lipid	Pregnenolone Steroids	HMDB00416
1-palmitoyl-2-linoleoyl-GPC (16:0/18:2)	42446	919	-2.88523e-05	0.827847	1	0.949516	Lipid	Phosphatidylcholine (PC)	HMDB07973
aconitate [cis or trans]	46173	919	3.97434e-05	0.831676	1	0.950985	Energy	TCA Cycle	NA
3,7-dimethylurate	34399	747	-0.000166371	0.831693	1	0.950985	Xenobiotics	Xanthine Metabolism	HMDB01982
beta-guanidinopropanoate	35101	560	-0.000195378	0.832897	1	0.950985	Xenobiotics	Food Component/Plant	HMDB13222
methylmalonate (MMA)	1496	876	-0.000119374	0.836536	1	0.95235	Lipid	Fatty Acid Metabolism (also BCAA Metabolism)	HMDB00202
sphingomyelin (d18:1/20:0, d16:1/22:0)*	48490	919	3.58339e-05	0.836608	1	0.95235	Lipid	Sphingolipid Metabolism	HMDB12102
octanoylcarnitine (C8)	33936	919	-0.000108569	0.841654	1	0.954074	Lipid	Fatty Acid Metabolism(Acyl Carnitine)	HMDB00791
5alpha-androstan-3alpha,17beta-diol monosulfate (2)	37185	268	-0.000254685	0.841845	1	0.954074	Lipid	Androgenic Steroids	NA
gentisate	18280	880	-0.000140113	0.844023	1	0.954074	Amino Acid	Tyrosine Metabolism	HMDB00152
stearidonate (18:4n3)	33969	918	0.000116022	0.844884	1	0.954074	Lipid	Polyunsaturated Fatty Acid (n3 and n6)	HMDB06547
hexadecanedioate (C16-DC)	35678	918	9.50272e-05	0.845674	1	0.954074	Lipid	Fatty Acid, Dicarboxylate	HMDB00672
prolylglycine	40703	841	-9.04486e-05	0.845685	1	0.954074	Peptide	Dipeptide	HMDB11178
1-stearoyl-2-docosahexaenoyl-GPE (18:0/22:6)*	52466	914	-0.000111344	0.849654	1	0.956871	Lipid	Phosphatidylethanolamine (PE)	HMDB05334
N-palmitoyl-sphingosine (d18:1/16:0)	44877	919	-4.33126e-05	0.850711	1	0.956871	Lipid	Ceramides	HMDB04949
palmitate (16:0)	1336	919	-5.20411e-05	0.853493	1	0.956871	Lipid	Long Chain Fatty Acid	HMDB00220
palmitoleoylcarnitine (C16:1)*	53223	919	7.27418e-05	0.85416	1	0.956871	Lipid	Fatty Acid Metabolism(Acyl Carnitine)	NA
5-acetylamino-6-formylamino-3-methyluracil	34401	774	-0.000200724	0.854909	1	0.956871	Xenobiotics	Xanthine Metabolism	HMDB11105
palmitoyl ethanolamide	38165	919	-4.24649e-05	0.856405	1	0.956871	Lipid	Endocannabinoid	HMDB02100
taurine	2125	919	4.22194e-05	0.857214	1	0.956871	Amino Acid	Methionine, Cysteine, SAM and Taurine Metabolism	HMDB00251
dopamine 3-O-sulfate	48407	918	-8.54766e-05	0.858677	1	0.956871	Amino Acid	Tyrosine Metabolism	HMDB06275
urate	1604	919	3.45477e-05	0.860188	1	0.956871	Nucleotide	Purine Metabolism, (Hypo)Xanthine/Inosine containing	HMDB00289
2-piperidinone	43400	919	-0.000154112	0.860805	1	0.956871	Xenobiotics	Food Component/Plant	HMDB11749
margarate (17:0)	1121	919	6.51204e-05	0.86251	1	0.95736	Lipid	Long Chain Fatty Acid	HMDB02259
7-ketodeoxycholate	31904	205	0.000370829	0.866825	1	0.957606	Lipid	Secondary Bile Acid Metabolism	HMDB00391
tauroursodeoxycholate	39378	279	0.000274147	0.866988	1	0.957606	Lipid	Secondary Bile Acid Metabolism	HMDB00874
creatinine	513	919	2.25006e-05	0.867559	1	0.957606	Amino Acid	Creatine Metabolism	HMDB00562
pregnanediol-3-glucuronide	40708	870	-0.00011896	0.867791	1	0.957606	Lipid	Progestin Steroids	HMDB10318
4-vinylphenol sulfate	36098	918	-0.000165741	0.869164	1	0.957725	Xenobiotics	Benzoate Metabolism	HMDB04072
phenol sulfate	32553	919	0.000112043	0.874231	1	0.960914	Amino Acid	Tyrosine Metabolism	HMDB60015
1-stearoyl-2-arachidonoyl-GPE (18:0/20:4)	52447	919	5.4472e-05	0.87528	1	0.960914	Lipid	Phosphatidylethanolamine (PE)	HMDB09003
N-acetylserine	37076	919	3.06342e-05	0.876697	1	0.960914	Amino Acid	Glycine, Serine and Threonine Metabolism	HMDB02931
5alpha-pregnan-3beta,20alpha-diol disulfate	37198	911	0.000135657	0.877136	1	0.960914	Lipid	Progestin Steroids	NA
perfluorooctanoate (PFOA)*	62071	919	-6.8351e-05	0.880795	1	0.963528	Xenobiotics	Chemical	HMDB59587
quinolinate	1899	875	5.85553e-05	0.883493	1	0.963828	Cofactors and Vitamins	Nicotinate and Nicotinamide Metabolism	HMDB00232
glycosyl ceramide (d18:1/23:1, d17:1/24:1)*	57448	594	-8.52628e-05	0.884451	1	0.963828	Lipid	Ceramides	NA
4-methyl-2-oxopentanoate	22116	919	-3.10677e-05	0.886318	1	0.963828	Amino Acid	Leucine, Isoleucine and Valine Metabolism	HMDB00695
cholate	22842	824	0.000182069	0.88698	1	0.963828	Lipid	Primary Bile Acid Metabolism	HMDB00619
S-methylcysteine	39592	919	-6.15378e-05	0.8914	1	0.963828	Amino Acid	Methionine, Cysteine, SAM and Taurine Metabolism	HMDB02108
3-hydroxybutyrylcarnitine (1)	43264	748	-0.000110166	0.892882	1	0.963828	Lipid	Fatty Acid Metabolism(Acyl Carnitine)	HMDB13127
3-hydroxyhippurate	39600	916	-0.000151008	0.893449	1	0.963828	Xenobiotics	Benzoate Metabolism	HMDB06116
2-hydroxylaurate	52916	829	-4.77848e-05	0.895058	1	0.963828	Lipid	Fatty Acid, Monohydroxy	NA
guanidinoacetate	43802	919	-3.39925e-05	0.896965	1	0.963828	Amino Acid	Creatine Metabolism	HMDB00128
dimethylarginine (SDMA + ADMA)	36808	919	-2.60614e-05	0.897392	1	0.963828	Amino Acid	Urea cycle; Arginine and Proline Metabolism	HMDB01539
1-stearoyl-2-linoleoyl-GPE (18:0/18:2)*	52446	919	-5.32587e-05	0.897546	1	0.963828	Lipid	Phosphatidylethanolamine (PE)	HMDB08994
1-palmitoleoyl-GPC (16:1)*	33230	919	3.82864e-05	0.89794	1	0.963828	Lipid	Lysophospholipid	HMDB10383
glycochenodeoxycholate	32346	914	0.000120569	0.898453	1	0.963828	Lipid	Primary Bile Acid Metabolism	HMDB00637
N-formylmethionine	2829	919	-2.47043e-05	0.898893	1	0.963828	Amino Acid	Methionine, Cysteine, SAM and Taurine Metabolism	HMDB01015
taurodeoxycholate	12261	817	-0.000149976	0.900853	1	0.964562	Lipid	Secondary Bile Acid Metabolism	HMDB00896
o-cresol sulfate	36845	573	0.000121804	0.903476	1	0.966005	Xenobiotics	Benzoate Metabolism	NA
glycocholate	18476	913	0.000124246	0.908937	1	0.968938	Lipid	Primary Bile Acid Metabolism	HMDB00138
4-methylcatechol sulfate	46146	919	-9.08038e-05	0.909739	1	0.968938	Xenobiotics	Benzoate Metabolism	NA
phenol glucuronide	52747	529	0.000130659	0.910059	1	0.968938	Amino Acid	Tyrosine Metabolism	HMDB60014
N-acetylthreonine	33939	915	2.19957e-05	0.912809	1	0.969168	Amino Acid	Glycine, Serine and Threonine Metabolism	NA
3,4-methyleneheptanoate	53026	655	8.58673e-05	0.912836	1	0.969168	Xenobiotics	Food Component/Plant	NA
11-ketoetiocholanolone glucuronide	47135	665	7.55337e-05	0.91617	1	0.96933	Lipid	Androgenic Steroids	NA
taurolithocholate 3-sulfate	36850	903	-9.52932e-05	0.916238	1	0.96933	Lipid	Secondary Bile Acid Metabolism	HMDB02580
1-methylurate	34395	663	9.93571e-05	0.91683	1	0.96933	Xenobiotics	Xanthine Metabolism	HMDB03099
5,6-dihydrouridine	61833	919	2.21257e-05	0.918142	1	0.969364	Nucleotide	Pyrimidine Metabolism, Uracil containing	NA
myristoleoylcarnitine (C14:1)*	48182	919	5.19195e-05	0.919819	1	0.969781	Lipid	Fatty Acid Metabolism(Acyl Carnitine)	NA
7-methylurate	39598	749	-6.51083e-05	0.927624	1	0.974011	Xenobiotics	Xanthine Metabolism	HMDB11107
4-cholesten-3-one	38125	787	-3.13658e-05	0.929208	1	0.974011	Lipid	Sterol	HMDB00921
1-palmitoyl-2-oleoyl-GPE (16:0/18:1)	19263	913	4.36758e-05	0.929403	1	0.974011	Lipid	Phosphatidylethanolamine (PE)	HMDB05320
glycocholate glucuronide (1)	52977	479	-0.00010759	0.934667	1	0.974011	Lipid	Primary Bile Acid Metabolism	NA
S-allylcysteine	43239	787	9.96965e-05	0.937542	1	0.974011	Xenobiotics	Food Component/Plant	HMDB34323
N-formylanthranilic acid	43549	796	-3.37256e-05	0.937811	1	0.974011	Amino Acid	Tryptophan Metabolism	HMDB04089
L-urobilin	40173	400	0.000119744	0.938884	1	0.974011	Cofactors and Vitamins	Hemoglobin and Porphyrin Metabolism	HMDB04159
1-palmitoyl-2-docosahexaenoyl-GPC (16:0/22:6)	52610	919	1.97375e-05	0.939707	1	0.974011	Lipid	Phosphatidylcholine (PC)	HMDB07991
1-stearoyl-2-linoleoyl-GPC (18:0/18:2)*	52452	919	1.03955e-05	0.941551	1	0.974011	Lipid	Phosphatidylcholine (PC)	HMDB08039
argininate*	57461	919	3.28102e-05	0.941873	1	0.974011	Amino Acid	Urea cycle; Arginine and Proline Metabolism	HMDB03148
trimethylamine N-oxide	40406	919	4.29075e-05	0.942464	1	0.974011	Lipid	Phospholipid Metabolism	HMDB00925
N2,N2-dimethylguanosine	35137	919	-1.44186e-05	0.943865	1	0.974011	Nucleotide	Purine Metabolism, Guanine containing	HMDB04824
3-methoxytyrosine	12017	919	2.3385e-05	0.943886	1	0.974011	Amino Acid	Tyrosine Metabolism	HMDB01434
allantoin	1107	919	-1.15872e-05	0.943945	1	0.974011	Nucleotide	Purine Metabolism, (Hypo)Xanthine/Inosine containing	HMDB00462
trans-4-hydroxyproline	32306	919	2.3927e-05	0.944804	1	0.974011	Amino Acid	Urea cycle; Arginine and Proline Metabolism	HMDB00725
1-stearoyl-2-oleoyl-GPC (18:0/18:1)	52438	919	1.79202e-05	0.945673	1	0.974011	Lipid	Phosphatidylcholine (PC)	HMDB08038
4-allylphenol sulfate	37181	914	-6.32998e-05	0.946689	1	0.974011	Xenobiotics	Food Component/Plant	NA
sphingomyelin (d18:2/24:1, d18:1/24:2)*	52437	919	1.20353e-05	0.946991	1	0.974011	Lipid	Sphingolipid Metabolism	NA
hypotaurine	590	842	-2.8732e-05	0.950646	1	0.976444	Amino Acid	Methionine, Cysteine, SAM and Taurine Metabolism	HMDB00965
heme	41754	814	4.59252e-05	0.952915	1	0.977448	Cofactors and Vitamins	Hemoglobin and Porphyrin Metabolism	HMDB03178
5alpha-pregnan-3(alpha or beta),20beta-diol disulfate	46172	390	-5.83824e-05	0.962806	1	0.983567	Lipid	Progestin Steroids	NA
5-methyluridine (ribothymidine)	35136	919	1.08311e-05	0.963312	1	0.983567	Nucleotide	Pyrimidine Metabolism, Uracil containing	HMDB00884
sphingomyelin (d18:1/22:1, d18:2/22:0, d16:1/24:1)*	48493	919	7.4001e-06	0.963702	1	0.983567	Lipid	Sphingolipid Metabolism	HMDB12104
1-(1-enyl-palmitoyl)-2-arachidonoyl-GPC (P-16:0/20:4)*	52689	919	-1.16093e-05	0.964078	1	0.983567	Lipid	Plasmalogen	HMDB11220
1-palmitoleoylglycerol (16:1)*	52431	741	-2.14397e-05	0.969854	1	0.986798	Lipid	Monoacylglycerol	HMDB11565
sphingomyelin (d18:2/21:0, d16:2/23:0)*	57480	919	9.36194e-06	0.97053	1	0.986798	Lipid	Sphingolipid Metabolism	NA
hexadecasphingosine (d16:1)*	57428	322	-2.52376e-05	0.972007	1	0.986798	Lipid	Sphingolipid Metabolism	NA
3b-hydroxy-5-cholenoic acid	43507	469	-2.32137e-05	0.972459	1	0.986798	Lipid	Secondary Bile Acid Metabolism	HMDB00308
1-palmitoyl-2-linoleoyl-GPE (16:0/18:2)	42449	919	1.1564e-05	0.979672	1	0.992787	Lipid	Phosphatidylethanolamine (PE)	HMDB05322
glutarylcarnitine (C5-DC)	44664	915	-8.25672e-06	0.982159	1	0.992974	Amino Acid	Lysine Metabolism	HMDB13130
pyridoxate	31555	919	1.52916e-05	0.983159	1	0.992974	Cofactors and Vitamins	Vitamin B6 Metabolism	HMDB00017
decanoylcarnitine (C10)	33941	919	1.12034e-05	0.983837	1	0.992974	Lipid	Fatty Acid Metabolism(Acyl Carnitine)	HMDB00651
pantothenate	1508	919	9.14764e-06	0.985103	1	0.992974	Cofactors and Vitamins	Pantothenate and CoA Metabolism	HMDB00210
1-(1-enyl-stearoyl)-GPE (P-18:0)*	39271	919	5.4638e-06	0.991605	1	0.997313	Lipid	Lysoplasmalogen	NA
nicotinamide	594	919	3.7742e-06	0.993172	1	0.997313	Cofactors and Vitamins	Nicotinate and Nicotinamide Metabolism	HMDB01406
vanillactate	54910	796	-3.44917e-06	0.994015	1	0.997313	Amino Acid	Tyrosine Metabolism	HMDB00913
erythronate*	42420	919	9.24225e-07	0.995848	1	0.997313	Carbohydrate	Aminosugar Metabolism	HMDB00613
indoleacetate	27513	919	2.26224e-06	0.995995	1	0.997313	Amino Acid	Tryptophan Metabolism	HMDB00197
S-methylmethionine	38127	540	4.92364e-07	0.999669	1	0.999669	Amino Acid	Methionine, Cysteine, SAM and Taurine Metabolism	HMDB38670

## Sheet: Supplemental Table 7
Supplemental Table 7. The full results of the association tests between each plasma metabolite and smoking.
Biochemical Names	Compound ID	N	Beta	P	Adjusted P	FDR q	Super pathway	Sub-pathway	HMDB ID
o-cresol sulfate	36845	809	0.644116	6.08515e-43	4.60646e-40	4.60646e-40	Xenobiotics	Benzoate Metabolism	NA
3-methyl catechol sulfate (1)	46165	1110	0.425514	4.01191e-19	3.03701e-16	1.51851e-16	Xenobiotics	Benzoate Metabolism	NA
4-vinylguaiacol sulfate	48442	434	0.566521	3.30119e-18	2.499e-15	8.33e-16	Xenobiotics	Food Component/Plant	NA
3-hydroxypyridine sulfate	48448	1113	0.364356	1.32171e-12	1.00054e-09	2.50134e-10	Xenobiotics	Chemical	NA
N-(2-furoyl)glycine	31536	935	0.250157	1.79775e-11	1.3609e-08	2.72179e-09	Xenobiotics	Food Component/Plant	HMDB00439
tartronate (hydroxymalonate)	20693	1118	-0.151672	4.14527e-10	3.13797e-07	5.22995e-08	Xenobiotics	Bacterial/Fungal	HMDB35227
oxalate (ethanedioate)	20694	1120	-0.100545	2.34786e-08	1.77733e-05	2.53905e-06	Cofactors and Vitamins	Ascorbate and Aldarate Metabolism	HMDB02329
3-carboxy-4-methyl-5-pentyl-2-furanpropionate (3-Cmpfp)**	61871	1120	-0.113753	2.84829e-08	2.15616e-05	2.6952e-06	Lipid	Fatty Acid, Dicarboxylate	NA
1-palmitoyl-2-oleoyl-GPC (16:0/18:1)	52461	1120	0.0454006	1.16541e-07	8.82216e-05	9.8024e-06	Lipid	Phosphatidylcholine (PC)	HMDB07972
glycerate	1572	1120	-0.0744276	1.62632e-07	0.000123113	1.23113e-05	Carbohydrate	Glycolysis, Gluconeogenesis, and Pyruvate Metabolism	HMDB00139
4-vinylphenol sulfate	36098	1119	0.243815	8.87552e-07	0.000671876	6.10797e-05	Xenobiotics	Benzoate Metabolism	HMDB04072
piperine	33935	1117	-0.271828	1.161e-06	0.000878875	7.32396e-05	Xenobiotics	Food Component/Plant	HMDB29377
1-palmitoyl-2-palmitoleoyl-GPC (16:0/16:1)*	52470	1120	0.0960405	2.41039e-06	0.00182467	0.000140359	Lipid	Phosphatidylcholine (PC)	HMDB07969
cysteine sulfinic acid	37443	836	0.0816142	6.05351e-06	0.0045825	0.000327322	Amino Acid	Methionine, Cysteine, SAM and Taurine Metabolism	HMDB00996
threonate	27738	1120	-0.0990453	7.97243e-06	0.00603513	0.000402342	Cofactors and Vitamins	Ascorbate and Aldarate Metabolism	HMDB00943
N-acetylcarnosine	43488	1120	-0.0796832	1.58793e-05	0.0120206	0.000751288	Amino Acid	Histidine Metabolism	HMDB12881
4-hydroxychlorothalonil	48441	1120	-0.0973833	1.8997e-05	0.0143808	0.000845927	Xenobiotics	Chemical	NA
quinolinate	1899	1099	-0.0818351	2.35506e-05	0.0178278	0.000990434	Cofactors and Vitamins	Nicotinate and Nicotinamide Metabolism	HMDB00232
indole-3-carboxylic acid	38116	1023	-0.0857319	3.18655e-05	0.0241222	0.00126959	Amino Acid	Tryptophan Metabolism	HMDB03320
indolepropionate	32405	1118	-0.152797	3.75551e-05	0.0284292	0.00142146	Amino Acid	Tryptophan Metabolism	HMDB02302
beta-cryptoxanthin	57591	1120	-0.136083	3.96669e-05	0.0300279	0.0014299	Cofactors and Vitamins	Vitamin A Metabolism	HMDB33844
caffeine	569	1094	-0.25414	4.39524e-05	0.033272	0.00151236	Xenobiotics	Xanthine Metabolism	HMDB01847
1-arachidonoyl-GPE (20:4n6)*	35186	1120	0.0509003	4.60703e-05	0.0348752	0.00151631	Lipid	Lysophospholipid	HMDB11517
isoeugenol sulfate	48997	447	0.219964	7.03439e-05	0.0532503	0.00221876	Xenobiotics	Food Component/Plant	NA
hydantoin-5-propionic acid	40473	1117	-0.0977412	0.000115044	0.087088	0.00348352	Amino Acid	Histidine Metabolism	HMDB01212
uridine	606	1120	-0.0388866	0.000149238	0.112973	0.00424904	Nucleotide	Pyrimidine Metabolism, Uracil containing	HMDB00296
pyridoxate	31555	1120	-0.138669	0.000151551	0.114724	0.00424904	Cofactors and Vitamins	Vitamin B6 Metabolism	HMDB00017
1-palmitoyl-2-arachidonoyl-GPE (16:0/20:4)*	52464	1120	0.0719727	0.000166935	0.12637	0.00451321	Lipid	Phosphatidylethanolamine (PE)	HMDB05323
N2,N2-dimethylguanosine	35137	1120	-0.0353339	0.000207258	0.156894	0.00534213	Nucleotide	Purine Metabolism, Guanine containing	HMDB04824
adenine	554	1120	-0.061238	0.000211709	0.160264	0.00534213	Nucleotide	Purine Metabolism, Adenine containing	HMDB00034
3-acetylphenol sulfate	48693	573	0.162824	0.00022606	0.171127	0.00552023	Xenobiotics	Chemical	NA
methyl-4-hydroxybenzoate sulfate	48429	1107	-0.293278	0.000289539	0.219181	0.0068494	Xenobiotics	Benzoate Metabolism	NA
p-cresol-glucuronide*	48841	1115	-0.199492	0.00032344	0.244844	0.00741953	Amino Acid	Tyrosine Metabolism	HMDB11686
N-acetylaspartate (NAA)	22185	1120	-0.0274949	0.000409782	0.310205	0.00912368	Amino Acid	Alanine and Aspartate Metabolism	HMDB00812
phenylacetylglutamine	35126	1120	-0.0985841	0.000452148	0.342276	0.00977933	Peptide	Acetylated Peptides	HMDB06344
hypoxanthine	3127	1120	0.0864905	0.000599942	0.454156	0.0126154	Nucleotide	Purine Metabolism, (Hypo)Xanthine/Inosine containing	HMDB00157
ethyl glucuronide	39603	513	0.266042	0.000637215	0.482372	0.0129944	Xenobiotics	Chemical	HMDB10325
perfluorooctanesulfonic acid (PFOS)	57564	1120	-0.0821329	0.000667724	0.505467	0.0129944	Xenobiotics	Chemical	HMDB59586
N1-Methyl-2-pyridone-5-carboxamide	40469	1120	-0.083362	0.000669461	0.506782	0.0129944	Cofactors and Vitamins	Nicotinate and Nicotinamide Metabolism	HMDB04193
lignoceroyl sphingomyelin (d18:1/24:0)	57330	1120	0.0397755	0.000692922	0.524542	0.0131135	Lipid	Sphingolipid Metabolism	NA
1,7-dimethylurate	34400	1096	-0.154401	0.000747772	0.566063	0.0132126	Xenobiotics	Xanthine Metabolism	HMDB11103
p-cresol sulfate	36103	1120	-0.124933	0.000758374	0.574089	0.0132126	Xenobiotics	Benzoate Metabolism	HMDB11635
lactosyl-N-nervonoyl-sphingosine (d18:1/24:1)*	57370	1120	0.0448266	0.00077667	0.587939	0.0132126	Lipid	Ceramides	NA
1-stearoyl-2-oleoyl-GPC (18:0/18:1)	52438	1120	0.0439135	0.000800551	0.606017	0.0132126	Lipid	Phosphatidylcholine (PC)	HMDB08038
pregnenolone sulfate	38170	1065	0.102844	0.00080063	0.606077	0.0132126	Lipid	Pregnenolone Steroids	HMDB00774
linoleoylcholine*	57463	1120	-0.105419	0.000802882	0.607782	0.0132126	Lipid	Fatty Acid Metabolism (Acyl Choline)	NA
glycochenodeoxycholate sulfate	52974	1078	0.142669	0.00114757	0.868714	0.0183164	Lipid	Primary Bile Acid Metabolism	NA
9-hydroxystearate	47120	1106	0.0754914	0.00116141	0.879188	0.0183164	Lipid	Fatty Acid, Monohydroxy	HMDB61661
1-oleoyl-GPE (18:1)	35628	1120	0.0596107	0.00118918	0.900207	0.0183716	Lipid	Lysophospholipid	HMDB11506
1-ribosyl-imidazoleacetate*	61868	1120	-0.053995	0.00121778	0.921861	0.0184372	Amino Acid	Histidine Metabolism	HMDB02331
phenol sulfate	32553	1120	-0.114434	0.00129371	0.979336	0.0189541	Amino Acid	Tyrosine Metabolism	HMDB60015
docosahexaenoylcholine	53263	1097	-0.103394	0.001302	0.985614	0.0189541	Lipid	Fatty Acid Metabolism (Acyl Choline)	NA
1-linoleoyl-GPE (18:2)*	36600	1120	0.0532621	0.00133786	1	0.0191086	Lipid	Lysophospholipid	HMDB11507
stearoyl ethanolamide	38625	1120	0.0529967	0.00140249	1	0.0194397	Lipid	Endocannabinoid	HMDB13078
N-acetyltaurine	48187	1111	0.0713349	0.00141239	1	0.0194397	Amino Acid	Methionine, Cysteine, SAM and Taurine Metabolism	NA
palmitoyl ethanolamide	38165	1120	0.0355619	0.00183954	1	0.0245727	Lipid	Endocannabinoid	HMDB02100
nicotinamide	594	1120	-0.078369	0.00185026	1	0.0245727	Cofactors and Vitamins	Nicotinate and Nicotinamide Metabolism	HMDB01406
docosahexaenoate (DHA; 22:6n3)	44675	1120	-0.0815828	0.00193361	1	0.025237	Lipid	Polyunsaturated Fatty Acid (n3 and n6)	HMDB02183
1-stearoyl-2-arachidonoyl-GPE (18:0/20:4)	52447	1120	0.0492249	0.00201119	1	0.0258046	Lipid	Phosphatidylethanolamine (PE)	HMDB09003
N-delta-acetylornithine	43249	1120	-0.0694507	0.00215457	1	0.026935	Amino Acid	Urea cycle; Arginine and Proline Metabolism	NA
1-palmitoleoyl-GPC (16:1)*	33230	1120	0.0447475	0.00217045	1	0.026935	Lipid	Lysophospholipid	HMDB10383
methionine sulfoxide	18374	1120	-0.0318519	0.00241278	1	0.0294593	Amino Acid	Methionine, Cysteine, SAM and Taurine Metabolism	HMDB02005
3-hydroxy-2-ethylpropionate	32397	1120	-0.0455588	0.00252476	1	0.0300132	Amino Acid	Leucine, Isoleucine and Valine Metabolism	HMDB00396
stearoylcholine*	57464	1111	-0.0983219	0.00259877	1	0.0300132	Lipid	Fatty Acid Metabolism (Acyl Choline)	NA
17alpha-hydroxypregnenolone 3-sulfate	37482	338	0.132827	0.0026012	1	0.0300132	Lipid	Pregnenolone Steroids	HMDB00416
1-palmitoyl-2-oleoyl-GPE (16:0/18:1)	19263	1117	0.0744347	0.00261674	1	0.0300132	Lipid	Phosphatidylethanolamine (PE)	HMDB05320
theophylline	18394	1086	-0.138668	0.00289178	1	0.0323831	Xenobiotics	Xanthine Metabolism	HMDB01889
perfluorooctanoate (PFOA)*	62071	1120	-0.0569411	0.0029697	1	0.0323831	Xenobiotics	Chemical	HMDB59587
1-cerotoyl-GPC (26:0)*	61505	959	0.0562172	0.0030226	1	0.0323831	Lipid	Lysophospholipid	HMDB29205
phenylacetylglutamate	52925	1033	-0.108384	0.00302743	1	0.0323831	Peptide	Acetylated Peptides	HMDB59772
1,2-dipalmitoyl-GPC (16:0/16:0)	19130	1120	0.0236295	0.00303725	1	0.0323831	Lipid	Phosphatidylcholine (PC)	HMDB00564
carboxyethyl-GABA	40007	1117	-0.0430381	0.0031593	1	0.0332165	Amino Acid	Glutamate Metabolism	HMDB02201
maleate	20676	1096	0.0563625	0.00347902	1	0.0357095	Lipid	Fatty Acid, Dicarboxylate	HMDB00176
1-palmitoyl-2-oleoyl-GPI (16:0/18:1)*	52669	1104	0.0593285	0.00349076	1	0.0357095	Lipid	Phosphatidylinositol (PI)	HMDB09783
xylose	15581	1072	0.0555838	0.00367299	1	0.0370727	Carbohydrate	Pentose Metabolism	HMDB00098
kynurenate	1417	1120	-0.0481525	0.00378086	1	0.0374865	Amino Acid	Tryptophan Metabolism	HMDB00715
4-hydroxycoumarin	37445	994	-0.144937	0.00381303	1	0.0374865	Xenobiotics	Drug - Cardiovascular	NA
guaiacol sulfate	46111	1120	0.0952239	0.00387832	1	0.0376396	Xenobiotics	Benzoate Metabolism	HMDB60013
3beta-hydroxy-5-cholestenoate	54805	1120	0.0474927	0.00407533	1	0.039051	Lipid	Sterol	NA
bilirubin (E,Z or Z,E)*	47886	1120	-0.0478245	0.00414072	1	0.0391816	Cofactors and Vitamins	Hemoglobin and Porphyrin Metabolism	HMDB00488
indoleacetate	27513	1120	-0.065364	0.00431226	1	0.040301	Amino Acid	Tryptophan Metabolism	HMDB00197
sulfate*	46960	1120	-0.0226469	0.00440745	1	0.0404505	Xenobiotics	Chemical	HMDB01448
5alpha-androstan-3beta,17alpha-diol disulfate	37187	934	-0.159641	0.00443512	1	0.0404505	Lipid	Androgenic Steroids	NA
1-oleoyl-2-docosahexaenoyl-GPC (18:1/22:6)*	52697	1120	-0.0374427	0.00502161	1	0.0452543	Lipid	Phosphatidylcholine (PC)	HMDB08123
hexanoylglycine	35436	834	0.100299	0.00519856	1	0.0461444	Lipid	Fatty Acid Metabolism(Acyl Glycine)	HMDB00701
1H-indole-7-acetic acid	57783	1078	-0.0857557	0.00529913	1	0.0461444	Xenobiotics	Bacterial/Fungal	NA
pantothenate	1508	1120	-0.0681711	0.00530672	1	0.0461444	Cofactors and Vitamins	Pantothenate and CoA Metabolism	HMDB00210
1-palmitoyl-2-dihomo-linolenoyl-GPC (16:0/20:3n3 or 6)*	52454	1120	0.0210764	0.00536421	1	0.0461444	Lipid	Phosphatidylcholine (PC)	NA
1-(1-enyl-stearoyl)-2-oleoyl-GPE (P-18:0/18:1)	52614	1119	0.053438	0.00543377	1	0.0462176	Lipid	Plasmalogen	HMDB11375
creatinine	513	1120	-0.0177039	0.00579685	1	0.048758	Amino Acid	Creatine Metabolism	HMDB00562
trans-4-hydroxyproline	32306	1120	0.0473118	0.0060586	1	0.0502073	Amino Acid	Urea cycle; Arginine and Proline Metabolism	HMDB00725
urea	1670	1120	-0.033764	0.00610181	1	0.0502073	Amino Acid	Urea cycle; Arginine and Proline Metabolism	HMDB00294
2'-deoxyuridine	52602	1116	-0.0423333	0.0062296	1	0.0502613	Nucleotide	Pyrimidine Metabolism, Uracil containing	HMDB00012
1-stearoyl-GPE (18:0)	42398	1120	0.0384399	0.00624116	1	0.0502613	Lipid	Lysophospholipid	HMDB11130
ribulonate/xylulonate*	61858	1117	-0.0537272	0.0065696	1	0.0523494	Carbohydrate	Pentose Metabolism	NA
threonine	1284	1120	0.0271699	0.00670709	1	0.0528882	Amino Acid	Glycine, Serine and Threonine Metabolism	HMDB00167
N-acetylneuraminate	32377	1120	0.0353564	0.00717409	1	0.0559875	Carbohydrate	Aminosugar Metabolism	HMDB00230
3-carboxy-4-methyl-5-propyl-2-furanpropanoate (CMPF)	31787	1120	-0.166945	0.00820983	1	0.0630117	Lipid	Fatty Acid, Dicarboxylate	HMDB61112
1-stearoyl-2-oleoyl-GPG (18:0/18:1)	52623	1119	-0.0450167	0.00824063	1	0.0630117	Lipid	Phosphatidylglycerol (PG)	NA
adrenate (22:4n6)	32980	1119	0.0643439	0.00856893	1	0.0648668	Lipid	Polyunsaturated Fatty Acid (n3 and n6)	HMDB02226
S-adenosylhomocysteine (SAH)	42382	896	-0.0563962	0.00893183	1	0.0669445	Amino Acid	Methionine, Cysteine, SAM and Taurine Metabolism	HMDB00939
3-methylglutarylcarnitine (2)	46548	1119	-0.0749722	0.00998103	1	0.0740749	Amino Acid	Leucine, Isoleucine and Valine Metabolism	HMDB00552
thyroxine	2761	1120	0.0261281	0.0103124	1	0.075791	Amino Acid	Tyrosine Metabolism	HMDB01918
gluconate	587	1120	-0.0364043	0.0106956	1	0.0778515	Xenobiotics	Food Component/Plant	HMDB00625
1-myristoyl-2-palmitoyl-GPC (14:0/16:0)	19258	1120	0.062591	0.0114671	1	0.0826721	Lipid	Phosphatidylcholine (PC)	HMDB07869
methylsuccinoylcarnitine	53031	880	-0.086833	0.0119946	1	0.0852428	Amino Acid	Leucine, Isoleucine and Valine Metabolism	NA
carotene diol (2)	57636	1120	-0.0591338	0.0120488	1	0.0852428	Cofactors and Vitamins	Vitamin A Metabolism	NA
1-linoleoylglycerol (18:2)	27447	1117	-0.0571855	0.0126533	1	0.0879348	Lipid	Monoacylglycerol	NA
3-hydroxybutyrylcarnitine (1)	43264	992	0.0964243	0.0126617	1	0.0879348	Lipid	Fatty Acid Metabolism(Acyl Carnitine)	HMDB13127
1-palmitoyl-2-linoleoyl-GPE (16:0/18:2)	42449	1120	0.0542813	0.0129226	1	0.0889312	Lipid	Phosphatidylethanolamine (PE)	HMDB05322
vanillylmandelate (VMA)	1567	1120	-0.0390322	0.0130598	1	0.0890653	Amino Acid	Tyrosine Metabolism	HMDB00291
theobromine	18392	1117	-0.119601	0.0134193	1	0.0907	Xenobiotics	Xanthine Metabolism	HMDB02825
glycochenodeoxycholate	32346	1117	0.1153	0.01399	1	0.0937209	Lipid	Primary Bile Acid Metabolism	HMDB00637
arachidonoylcholine	53261	1120	-0.0732283	0.0142561	1	0.0946654	Lipid	Fatty Acid Metabolism (Acyl Choline)	NA
alpha-ketoglutaramate**	62101	1120	-0.0279534	0.014552	1	0.09579	Amino Acid	Glutamate Metabolism	NA
3-methoxytyrosine	12017	1120	0.0397708	0.0150154	1	0.0975727	Amino Acid	Tyrosine Metabolism	HMDB01434
bilirubin (Z,Z)	43807	1120	-0.036659	0.0151184	1	0.0975727	Cofactors and Vitamins	Hemoglobin and Porphyrin Metabolism	HMDB00054
1-palmitoyl-2-arachidonoyl-GPC (16:0/20:4n6)	52462	1120	0.0203801	0.0152095	1	0.0975727	Lipid	Phosphatidylcholine (PC)	HMDB07982
3,4-methyleneheptanoylcarnitine	52929	825	-0.0842338	0.0155447	1	0.0987696	Lipid	Fatty Acid Metabolism(Acyl Carnitine)	NA
glycine conjugate of C10H14O2 (1)*	62146	1104	-0.0741862	0.015779	1	0.0987696	Partially Characterized Molecules	Partially Characterized Molecules	NA
1-oleoyl-GPI (18:1)*	36602	1111	0.0712601	0.0157875	1	0.0987696	Lipid	Lysophospholipid	NA
5-bromotryptophan	53242	1120	-0.0393308	0.0160348	1	0.0994946	Amino Acid	Tryptophan Metabolism	NA
stachydrine	34384	1120	-0.166769	0.0172956	1	0.106445	Xenobiotics	Food Component/Plant	HMDB04827
gamma-glutamylvaline	43829	1120	-0.0452303	0.0174937	1	0.106781	Peptide	Gamma-glutamyl Amino Acid	HMDB11172
lactosyl-N-behenoyl-sphingosine (d18:1/22:0)*	57422	1111	0.0441757	0.0176323	1	0.106781	Lipid	Sphingolipid Metabolism	NA
guanidinosuccinate	32446	781	-0.0766325	0.0177936	1	0.106903	Amino Acid	Guanidino and Acetamido Metabolism	HMDB03157
ornithine	1493	1120	0.0226477	0.0185582	1	0.110619	Amino Acid	Urea cycle; Arginine and Proline Metabolism	HMDB03374
carotene diol (3)	57637	1114	-0.062862	0.0187607	1	0.110952	Cofactors and Vitamins	Vitamin A Metabolism	NA
3-methylglutaconate	57747	1120	-0.0467623	0.0191396	1	0.111032	Amino Acid	Leucine, Isoleucine and Valine Metabolism	HMDB00522
1-lignoceroyl-GPC (24:0)	49617	1120	0.0380013	0.0192764	1	0.111032	Lipid	Lysophospholipid	HMDB10405
sphingomyelin (d18:1/17:0, d17:1/18:0, d19:1/16:0)	52615	1120	-0.0246795	0.0193481	1	0.111032	Lipid	Sphingolipid Metabolism	NA
acetylcarnitine (C2)	32198	1120	0.0335621	0.0193609	1	0.111032	Lipid	Fatty Acid Metabolism(Acyl Carnitine)	HMDB00201
5alpha-pregnan-3beta,20beta-diol monosulfate (1)	37196	1043	-0.0914509	0.0198361	1	0.112258	Lipid	Progestin Steroids	NA
myo-inositol	1124	1120	-0.0436909	0.0198713	1	0.112258	Lipid	Inositol Metabolism	HMDB00211
palmitoylcholine	52944	1120	-0.0711071	0.0202138	1	0.112559	Lipid	Fatty Acid Metabolism (Acyl Choline)	NA
behenoyl sphingomyelin (d18:1/22:0)*	48492	1120	0.0230185	0.0202983	1	0.112559	Lipid	Sphingolipid Metabolism	HMDB12103
5-hydroxyindole sulfate	52914	609	-0.115283	0.0203706	1	0.112559	Amino Acid	Tryptophan Metabolism	NA
16-hydroxypalmitate	39609	1120	0.0417078	0.0211546	1	0.115655	Lipid	Fatty Acid, Monohydroxy	HMDB06294
methyl indole-3-acetate	1584	998	-0.0772513	0.0212793	1	0.115655	Xenobiotics	Food Component/Plant	HMDB29738
phenylacetate	57745	967	-0.0830918	0.0214014	1	0.115655	Amino Acid	Phenylalanine Metabolism	HMDB00209
2-stearoyl-GPE (18:0)*	41220	1120	0.0389376	0.021542	1	0.115655	Lipid	Lysophospholipid	HMDB11129
1-(1-enyl-palmitoyl)-2-palmitoleoyl-GPC (P-16:0/16:1)*	52713	1120	0.0286247	0.0221422	1	0.11804	Lipid	Plasmalogen	HMDB11207
7-methylguanine	35114	1120	0.0193957	0.0223025	1	0.118063	Nucleotide	Purine Metabolism, Guanine containing	HMDB00897
lactosyl-N-palmitoyl-sphingosine (d18:1/16:0)	53010	1120	0.0248346	0.0226934	1	0.118945	Lipid	Ceramides	NA
valine	1649	1120	-0.0194288	0.0228215	1	0.118945	Amino Acid	Leucine, Isoleucine and Valine Metabolism	HMDB00883
1-oleoyl-GPC (18:1)	48258	1120	0.0235281	0.0230266	1	0.118945	Lipid	Lysophospholipid	HMDB02815
sphingomyelin (d18:1/20:1, d18:2/20:0)*	48491	1120	-0.0213463	0.0231017	1	0.118945	Lipid	Sphingolipid Metabolism	NA
3-methylcytidine	35132	1115	0.0324073	0.0232548	1	0.118945	Nucleotide	Pyrimidine Metabolism, Cytidine containing	NA
glycoursodeoxycholate	39379	1119	0.125634	0.0235131	1	0.119459	Lipid	Secondary Bile Acid Metabolism	HMDB00708
sphingosine 1-phosphate	34445	1120	0.0286357	0.0243975	1	0.123126	Lipid	Sphingolipid Metabolism	HMDB00277
5-oxoproline	1494	1120	-0.0188077	0.024595	1	0.123301	Amino Acid	Glutathione Metabolism	HMDB00267
glucuronide of C10H18O2 (7)*	61887	822	0.124524	0.0250393	1	0.124702	Partially Characterized Molecules	Partially Characterized Molecules	NA
proline	1898	1120	0.0254153	0.026341	1	0.130328	Amino Acid	Urea cycle; Arginine and Proline Metabolism	HMDB00162
3-methoxytyramine sulfate	44618	548	0.0856164	0.0266526	1	0.130957	Amino Acid	Tyrosine Metabolism	NA
adrenoylcarnitine (C22:4)*	57528	768	0.0510257	0.0268885	1	0.130957	Lipid	Fatty Acid Metabolism(Acyl Carnitine)	NA
1-palmitoyl-2-arachidonoyl-GPI (16:0/20:4)*	52467	1118	0.0441335	0.0269872	1	0.130957	Lipid	Phosphatidylinositol (PI)	HMDB09789
glycerophosphoethanolamine	37455	1120	0.0707228	0.0279651	1	0.134838	Lipid	Phospholipid Metabolism	HMDB00114
1-stearoyl-2-arachidonoyl-GPC (18:0/20:4)	42450	1120	0.0171256	0.0284239	1	0.136183	Lipid	Phosphatidylcholine (PC)	HMDB08048
2-hydroxyphenylacetate	1432	1079	-0.0513304	0.0289011	1	0.137598	Amino Acid	Tyrosine Metabolism	HMDB00669
1-(1-enyl-palmitoyl)-GPE (P-16:0)*	39270	1120	-0.036651	0.0296217	1	0.140148	Lipid	Lysoplasmalogen	NA
2-aminobutyrate	42374	1120	-0.0291034	0.0311067	1	0.14503	Amino Acid	Glutathione Metabolism	HMDB00650
tyramine O-sulfate	48408	1032	0.0993464	0.0313065	1	0.14503	Amino Acid	Tyrosine Metabolism	HMDB06409
phytanate	598	1120	-0.0532397	0.0313158	1	0.14503	Xenobiotics	Food Component/Plant	HMDB00801
N-formylphenylalanine	48433	962	-0.0462563	0.03142	1	0.14503	Amino Acid	Tyrosine Metabolism	NA
butyrylcarnitine (C4)	32412	1120	0.0386423	0.0325427	1	0.149302	Lipid	Fatty Acid Metabolism (also BCAA Metabolism)	HMDB02013
sphingomyelin (d18:1/22:2, d18:2/22:1, d16:1/24:2)*	57477	1120	-0.027332	0.0330487	1	0.150422	Lipid	Sphingolipid Metabolism	NA
sphingomyelin (d18:1/20:2, d18:2/20:1, d16:1/22:2)*	57481	1120	-0.0351048	0.0331842	1	0.150422	Lipid	Sphingolipid Metabolism	NA
propionylglycine	31932	1069	-0.055614	0.0335492	1	0.151171	Lipid	Fatty Acid Metabolism (also BCAA Metabolism)	HMDB00783
anthranilate	57746	854	-0.048885	0.0338386	1	0.151428	Amino Acid	Tryptophan Metabolism	HMDB01123
N1-methyladenosine	15650	1120	-0.0172313	0.0340117	1	0.151428	Nucleotide	Purine Metabolism, Adenine containing	HMDB03331
cysteine s-sulfate	22176	1120	0.0437588	0.034342	1	0.151428	Amino Acid	Methionine, Cysteine, SAM and Taurine Metabolism	HMDB00731
gamma-glutamylphenylalanine	33422	1120	-0.0276099	0.0344065	1	0.151428	Peptide	Gamma-glutamyl Amino Acid	HMDB00594
carotene diol (1)	57635	1120	-0.0452433	0.0348746	1	0.152312	Cofactors and Vitamins	Vitamin A Metabolism	NA
4-ethylphenylsulfate	36099	1118	0.127283	0.0350095	1	0.152312	Xenobiotics	Benzoate Metabolism	NA
6-hydroxyindole sulfate	48698	1119	-0.0564108	0.035491	1	0.153524	Xenobiotics	Chemical	NA
paraxanthine	18254	1020	-0.0860256	0.0361897	1	0.155657	Xenobiotics	Xanthine Metabolism	HMDB01860
S-methylcysteine sulfoxide	43378	1120	-0.0625419	0.0364641	1	0.155951	Amino Acid	Methionine, Cysteine, SAM and Taurine Metabolism	HMDB29432
sphingomyelin (d18:2/23:1)*	57482	1120	-0.0279239	0.0371699	1	0.158077	Lipid	Sphingolipid Metabolism	NA
tryptophan betaine	37097	1119	0.0976554	0.0374946	1	0.158567	Amino Acid	Tryptophan Metabolism	HMDB61115
sphingomyelin (d18:2/21:0, d16:2/23:0)*	57480	1120	-0.0242007	0.0383891	1	0.160646	Lipid	Sphingolipid Metabolism	NA
indoleacetylglutamine	42087	975	-0.0809886	0.0384108	1	0.160646	Amino Acid	Tryptophan Metabolism	HMDB13240
glycohyocholate	42574	930	0.0861306	0.0389297	1	0.161922	Lipid	Secondary Bile Acid Metabolism	NA
pro-hydroxy-pro	35127	1119	0.0362982	0.0401756	1	0.166191	Amino Acid	Urea cycle; Arginine and Proline Metabolism	HMDB06695
isoursodeoxycholate	57577	1117	0.114504	0.0406816	1	0.16737	Lipid	Secondary Bile Acid Metabolism	HMDB00686
hypotaurine	590	1062	0.0500718	0.0413532	1	0.169213	Amino Acid	Methionine, Cysteine, SAM and Taurine Metabolism	HMDB00965
gamma-glutamylthreonine	33364	1120	0.0287858	0.0422859	1	0.172099	Peptide	Gamma-glutamyl Amino Acid	HMDB29159
glycerophosphorylcholine (GPC)	15990	1120	-0.0338789	0.0433979	1	0.17568	Lipid	Phospholipid Metabolism	HMDB00086
glycochenodeoxycholate glucuronide (1)	52983	1108	-0.0854513	0.0440431	1	0.177344	Lipid	Primary Bile Acid Metabolism	NA
isovalerylglycine	35107	938	-0.0575171	0.0458041	1	0.183459	Amino Acid	Leucine, Isoleucine and Valine Metabolism	HMDB00678
taurochenodeoxycholate	18494	1082	0.107522	0.0465115	1	0.184548	Lipid	Primary Bile Acid Metabolism	HMDB00951
5alpha-pregnan-3beta,20alpha-diol monosulfate (2)	37200	1098	-0.0823549	0.0465637	1	0.184548	Lipid	Progestin Steroids	NA
oleoyl-arachidonoyl-glycerol (18:1/20:4) [2]*	54961	1098	0.0511747	0.0474265	1	0.186989	Lipid	Diacylglycerol	HMDB07228
1-palmitoyl-GPE (16:0)	35631	1120	0.0289242	0.0482102	1	0.189094	Lipid	Lysophospholipid	HMDB11503
O-sulfo-L-tyrosine	45413	1120	-0.0291172	0.0496215	1	0.19326	Xenobiotics	Chemical	NA
2-aminoadipate	6146	973	-0.0433365	0.0497855	1	0.19326	Amino Acid	Lysine Metabolism	HMDB00510
N-acetyl-2-aminooctanoate*	62059	1120	-0.0499655	0.0500382	1	0.19326	Lipid	Fatty Acid, Amino	HMDB59745
propyl 4-hydroxybenzoate sulfate	48460	743	-0.170196	0.0506231	1	0.194526	Xenobiotics	Benzoate Metabolism	NA
3-methoxycatechol sulfate (1)	48763	1005	0.119349	0.0510865	1	0.195315	Xenobiotics	Benzoate Metabolism	NA
guanidinoacetate	43802	1120	0.0247027	0.0514538	1	0.195731	Amino Acid	Creatine Metabolism	HMDB00128
succinimide	41888	1112	-0.033504	0.052116	1	0.196324	Xenobiotics	Chemical	NA
cinnamoylglycine	38637	1073	-0.123391	0.0521284	1	0.196324	Xenobiotics	Food Component/Plant	HMDB11621
5-hydroxylysine	15685	1054	0.0328794	0.0529595	1	0.198467	Amino Acid	Lysine Metabolism	HMDB00450
5alpha-androstan-3alpha,17beta-diol disulfate	37184	575	0.128637	0.0538208	1	0.200701	Lipid	Androgenic Steroids	NA
aspartate	443	1120	0.0283108	0.0544504	1	0.202054	Amino Acid	Alanine and Aspartate Metabolism	HMDB00191
1-oleoyl-2-docosahexaenoyl-GPE (18:1/22:6)*	53209	970	-0.0604356	0.0547457	1	0.202159	Lipid	Phosphatidylethanolamine (PE)	NA
oleoylcholine	53260	1119	-0.0605871	0.0569813	1	0.208411	Lipid	Fatty Acid Metabolism (Acyl Choline)	NA
kynurenine	15140	1120	-0.0215394	0.0569895	1	0.208411	Amino Acid	Tryptophan Metabolism	HMDB00684
glutamate, gamma-methyl ester	33487	1077	0.0270932	0.0574958	1	0.208594	Amino Acid	Glutamate Metabolism	HMDB61715
1-stearoyl-2-linoleoyl-GPE (18:0/18:2)*	52446	1120	0.0374077	0.0577856	1	0.208594	Lipid	Phosphatidylethanolamine (PE)	HMDB08994
palmitoleate (16:1n7)	33447	1120	0.0562793	0.0578664	1	0.208594	Lipid	Long Chain Fatty Acid	HMDB03229
nervonoylcarnitine (C24:1)*	57531	1114	0.0306411	0.0595555	1	0.213007	Lipid	Fatty Acid Metabolism(Acyl Carnitine)	NA
4-acetylphenol sulfate	44620	702	-0.117537	0.0596532	1	0.213007	Xenobiotics	Drug - Other	NA
ferulic acid 4-sulfate	47114	332	0.146862	0.0604512	1	0.214843	Xenobiotics	Food Component/Plant	HMDB29200
5alpha-androstan-3alpha,17alpha-diol monosulfate	37183	543	-0.0804098	0.0612092	1	0.21652	Lipid	Androgenic Steroids	NA
sphingomyelin (d17:2/16:0, d18:2/15:0)*	57483	1120	-0.0254502	0.0618474	1	0.21776	Lipid	Sphingolipid Metabolism	NA
lysine	1301	1120	-0.0124631	0.0627084	1	0.218955	Amino Acid	Lysine Metabolism	HMDB00182
arachidonoylcarnitine (C20:4)	57518	1118	0.0305845	0.0627652	1	0.218955	Lipid	Fatty Acid Metabolism(Acyl Carnitine)	NA
1-arachidonylglycerol (20:4)	34397	970	-0.0514331	0.0634464	1	0.219605	Lipid	Monoacylglycerol	HMDB11549
1,3,7-trimethylurate	34404	951	-0.0939357	0.0635317	1	0.219605	Xenobiotics	Xanthine Metabolism	HMDB02123
sphingomyelin (d18:1/24:1, d18:2/24:0)*	47153	1120	0.0209821	0.0639614	1	0.220085	Lipid	Sphingolipid Metabolism	HMDB12107
pyroglutamine*	46225	1120	0.0382805	0.0648919	1	0.222277	Amino Acid	Glutamate Metabolism	NA
HWESASXX*	57711	615	-0.0821452	0.066364	1	0.226295	Peptide	Polypeptide	NA
succinylcarnitine (C4-DC)	37058	1120	-0.0239089	0.0672159	1	0.228172	Energy	TCA Cycle	HMDB61717
carnitine	15500	1120	0.0153088	0.0679912	1	0.229774	Lipid	Carnitine Metabolism	HMDB00062
taurocholenate sulfate	32807	1120	0.0569785	0.0688373	1	0.231599	Lipid	Secondary Bile Acid Metabolism	NA
choline	15506	1120	-0.0161105	0.0693034	1	0.232136	Lipid	Phospholipid Metabolism	HMDB00097
sphingomyelin (d18:2/24:2)*	57479	1120	-0.0240076	0.0714616	1	0.23831	Lipid	Sphingolipid Metabolism	NA
sphingomyelin (d18:1/18:1, d18:2/18:0)	37529	1120	-0.0174034	0.0724895	1	0.240678	Lipid	Sphingolipid Metabolism	HMDB12101
allantoin	1107	1120	-0.0147887	0.0728982	1	0.240978	Nucleotide	Purine Metabolism, (Hypo)Xanthine/Inosine containing	HMDB00462
glycocholenate sulfate*	57741	1120	0.0350125	0.0750355	1	0.246965	Lipid	Secondary Bile Acid Metabolism	NA
sphingomyelin (d18:2/18:1)*	57474	1120	-0.0252385	0.0770584	1	0.251947	Lipid	Sphingolipid Metabolism	NA
dihydroorotate	601	1120	-0.0387397	0.0772148	1	0.251947	Nucleotide	Pyrimidine Metabolism, Orotate containing	HMDB03349
1-stearoyl-2-oleoyl-GPE (18:0/18:1)	42448	1120	0.0410931	0.0794996	1	0.258289	Lipid	Phosphatidylethanolamine (PE)	HMDB08993
1-myristoyl-2-arachidonoyl-GPC (14:0/20:4)*	53195	1120	0.0391414	0.080169	1	0.25935	Lipid	Phosphatidylcholine (PC)	HMDB07883
adenosine 5'-monophosphate (AMP)	32342	1021	0.0669822	0.0845312	1	0.272298	Nucleotide	Purine Metabolism, Adenine containing	HMDB00045
prolylglycine	40703	1069	-0.0405394	0.0849192	1	0.272389	Peptide	Dipeptide	HMDB11178
4-guanidinobutanoate	15681	1090	0.0496707	0.0860001	1	0.274692	Amino Acid	Guanidino and Acetamido Metabolism	HMDB03464
1-methylnicotinamide	27665	1120	-0.0476128	0.0868562	1	0.275185	Cofactors and Vitamins	Nicotinate and Nicotinamide Metabolism	HMDB00699
3,7-dimethylurate	34399	1012	-0.0649562	0.0868815	1	0.275185	Xenobiotics	Xanthine Metabolism	HMDB01982
pregn steroid monosulfate C21H34O5S*	32619	1120	0.0451385	0.0885478	1	0.279294	Lipid	Pregnenolone Steroids	NA
cysteine-glutathione disulfide	35159	1111	-0.0526128	0.0898812	1	0.281041	Amino Acid	Glutathione Metabolism	HMDB00656
dihomo-linolenoyl-choline	53262	1082	-0.058823	0.0900024	1	0.281041	Lipid	Fatty Acid Metabolism (Acyl Choline)	NA
eicosapentaenoate (EPA; 20:5n3)	18467	1120	-0.0551606	0.0902152	1	0.281041	Lipid	Polyunsaturated Fatty Acid (n3 and n6)	HMDB01999
5alpha-pregnan-3(alpha or beta),20beta-diol disulfate	46172	568	-0.108976	0.091163	1	0.282829	Lipid	Progestin Steroids	NA
stearoyl sphingomyelin (d18:1/18:0)	19503	1120	-0.0166382	0.0916954	1	0.28332	Lipid	Sphingolipid Metabolism	HMDB01348
imidazole propionate	40730	1113	0.0498178	0.0921662	1	0.283617	Amino Acid	Histidine Metabolism	HMDB02271
glycine	58	1120	0.0174088	0.0927882	1	0.284375	Amino Acid	Glycine, Serine and Threonine Metabolism	HMDB00123
gamma-CEHC	44876	1120	-0.0485434	0.0939289	1	0.286147	Cofactors and Vitamins	Tocopherol Metabolism	HMDB01931
2-hydroxyglutarate	37253	1115	0.0289283	0.0941224	1	0.286147	Lipid	Fatty Acid, Dicarboxylate	HMDB00606
3-indoxyl sulfate	27672	1120	-0.0424151	0.094601	1	0.286208	Amino Acid	Tryptophan Metabolism	HMDB00682
phenylalanine	64	1120	-0.00937423	0.0950214	1	0.286208	Amino Acid	Phenylalanine Metabolism	HMDB00159
isobutyrylcarnitine (C4)	33441	1120	-0.0398943	0.0952767	1	0.286208	Amino Acid	Leucine, Isoleucine and Valine Metabolism	HMDB00736
1,2,3-benzenetriol sulfate (2)	48762	830	0.13217	0.0957787	1	0.286579	Xenobiotics	Chemical	NA
glutamate	57	1120	0.0339021	0.0966393	1	0.288016	Amino Acid	Glutamate Metabolism	HMDB00148
leucine	60	1120	-0.0111771	0.0973682	1	0.28905	Amino Acid	Leucine, Isoleucine and Valine Metabolism	HMDB00687
arachidate (20:0)	1118	1120	0.0162431	0.0996594	1	0.294696	Lipid	Long Chain Fatty Acid	HMDB02212
gamma-glutamylglycine	33949	1120	0.0264511	0.100612	1	0.295265	Peptide	Gamma-glutamyl Amino Acid	HMDB11667
alpha-CEHC glucuronide*	39346	647	-0.126894	0.100632	1	0.295265	Cofactors and Vitamins	Tocopherol Metabolism	NA
lactate	527	1120	0.0217048	0.101073	1	0.295415	Carbohydrate	Glycolysis, Gluconeogenesis, and Pyruvate Metabolism	HMDB00190
2-hydroxypalmitate	35675	1120	-0.0187583	0.102899	1	0.297872	Lipid	Fatty Acid, Monohydroxy	HMDB31057
S-1-pyrroline-5-carboxylate	42370	1120	-0.0231311	0.103094	1	0.297872	Amino Acid	Glutamate Metabolism	HMDB01301
4-hydroxyphenylacetate	541	509	0.079458	0.103094	1	0.297872	Amino Acid	Phenylalanine Metabolism	HMDB00020
13-HODE + 9-HODE	37752	1117	0.0381624	0.104337	1	0.300317	Lipid	Fatty Acid, Monohydroxy	NA
heme	41754	1050	0.0598969	0.104943	1	0.300915	Cofactors and Vitamins	Hemoglobin and Porphyrin Metabolism	HMDB03178
S-methylmethionine	38127	836	-0.0962603	0.105644	1	0.301783	Amino Acid	Methionine, Cysteine, SAM and Taurine Metabolism	HMDB38670
N6-succinyladenosine	48130	905	0.035228	0.10868	1	0.309287	Nucleotide	Purine Metabolism, Adenine containing	HMDB00912
1-stearoyl-2-arachidonoyl-GPI (18:0/20:4)	52449	1120	0.0229587	0.109489	1	0.310424	Lipid	Phosphatidylinositol (PI)	HMDB09815
5alpha-pregnan-3beta,20alpha-diol disulfate	37198	1112	-0.0737443	0.11036	1	0.311099	Lipid	Progestin Steroids	NA
gamma-glutamylleucine	18369	1120	-0.0199603	0.110549	1	0.311099	Peptide	Gamma-glutamyl Amino Acid	HMDB11171
malonylcarnitine	37059	974	-0.0333868	0.111378	1	0.311956	Lipid	Fatty Acid Synthesis	HMDB02095
glycocholate	18476	1119	0.0842483	0.111678	1	0.311956	Lipid	Primary Bile Acid Metabolism	HMDB00138
oleoyl-oleoyl-glycerol (18:1/18:1) [2]*	54946	1118	0.0419512	0.114343	1	0.315189	Lipid	Diacylglycerol	HMDB07218
5-methyluridine (ribothymidine)	35136	1120	-0.0187222	0.114408	1	0.315189	Nucleotide	Pyrimidine Metabolism, Uracil containing	HMDB00884
1-stearoyl-2-docosahexaenoyl-GPC (18:0/22:6)	52611	1120	-0.0256647	0.114477	1	0.315189	Lipid	Phosphatidylcholine (PC)	HMDB08057
methyl glucopyranoside (alpha + beta)	46144	1080	-0.0725966	0.114687	1	0.315189	Xenobiotics	Food Component/Plant	NA
alpha-tocopherol	1561	1120	-0.0194956	0.114917	1	0.315189	Cofactors and Vitamins	Tocopherol Metabolism	HMDB01893
chenodeoxycholate	1563	787	0.0589594	0.115868	1	0.315663	Lipid	Primary Bile Acid Metabolism	HMDB00518
oleoyl-arachidonoyl-glycerol (18:1/20:4) [1]*	54960	1103	0.0425129	0.115924	1	0.315663	Lipid	Diacylglycerol	HMDB07228
methionine sulfone	44878	1120	-0.0263233	0.116856	1	0.31706	Amino Acid	Methionine, Cysteine, SAM and Taurine Metabolism	NA
sphingomyelin (d18:1/19:0, d19:1/18:0)*	57475	1120	-0.0192603	0.117676	1	0.318145	Lipid	Sphingolipid Metabolism	NA
argininate*	57461	1120	-0.0344152	0.11878	1	0.318758	Amino Acid	Urea cycle; Arginine and Proline Metabolism	HMDB03148
pyruvate	48990	1120	0.0164014	0.11887	1	0.318758	Carbohydrate	Glycolysis, Gluconeogenesis, and Pyruvate Metabolism	HMDB00243
eicosenoate (20:1)	33587	1120	0.037256	0.119166	1	0.318758	Lipid	Long Chain Fatty Acid	HMDB02231
4-methylcatechol sulfate	46146	1120	-0.05913	0.119629	1	0.31887	Xenobiotics	Benzoate Metabolism	NA
phenyllactate (PLA)	22130	1120	-0.0230476	0.122528	1	0.325451	Amino Acid	Phenylalanine Metabolism	HMDB00779
N6-carbamoylthreonyladenosine	35157	1119	-0.0208032	0.123205	1	0.326105	Nucleotide	Purine Metabolism, Adenine containing	HMDB41623
catechol sulfate	35320	1120	0.0478118	0.124081	1	0.326802	Xenobiotics	Benzoate Metabolism	HMDB59724
1-(1-enyl-palmitoyl)-2-oleoyl-GPE (P-16:0/18:1)*	52477	1120	0.0250122	0.124879	1	0.326802	Lipid	Plasmalogen	HMDB11342
linoleoyl-linoleoyl-glycerol (18:2/18:2) [1]*	54968	1120	-0.0506623	0.125189	1	0.326802	Lipid	Diacylglycerol	HMDB07248
palmitoylcarnitine (C16)	44681	1120	0.0195345	0.125195	1	0.326802	Lipid	Fatty Acid Metabolism(Acyl Carnitine)	HMDB00222
6-oxopiperidine-2-carboxylate	43231	1050	-0.0354297	0.129181	1	0.334614	Amino Acid	Lysine Metabolism	HMDB61705
2-hydroxy-3-methylvalerate	36746	1120	0.0301056	0.129689	1	0.334614	Amino Acid	Leucine, Isoleucine and Valine Metabolism	HMDB00317
cholesterol	63	1120	0.016816	0.129852	1	0.334614	Lipid	Sterol	HMDB00067
EDTA	22163	1120	0.00810993	0.130107	1	0.334614	Xenobiotics	Chemical	HMDB15109
tetradecanedioate (C14-DC)	35669	1116	0.0410962	0.130501	1	0.334614	Lipid	Fatty Acid, Dicarboxylate	HMDB00872
sarcosine	1516	1120	0.0155465	0.13084	1	0.334614	Amino Acid	Glycine, Serine and Threonine Metabolism	HMDB00271
3-hydroxysebacate	31943	1078	0.0533526	0.131909	1	0.336211	Lipid	Fatty Acid, Monohydroxy	HMDB00350
1-palmitoyl-2-docosahexaenoyl-GPC (16:0/22:6)	52610	1120	-0.0183703	0.134026	1	0.340461	Lipid	Phosphatidylcholine (PC)	HMDB07991
palmitoleoylcarnitine (C16:1)*	53223	1120	0.0293691	0.136594	1	0.345738	Lipid	Fatty Acid Metabolism(Acyl Carnitine)	NA
stearoylcarnitine (C18)	34409	1120	0.0218668	0.137016	1	0.345738	Lipid	Fatty Acid Metabolism(Acyl Carnitine)	HMDB00848
biliverdin	2137	1120	-0.0300549	0.137528	1	0.345877	Cofactors and Vitamins	Hemoglobin and Porphyrin Metabolism	HMDB01008
2-methylbutyrylcarnitine (C5)	45095	1112	-0.0256088	0.139828	1	0.350495	Amino Acid	Leucine, Isoleucine and Valine Metabolism	HMDB00378
umbelliferone sulfate	48674	740	-0.106867	0.142014	1	0.354155	Xenobiotics	Food Component/Plant	NA
histidine	59	1120	-0.00953924	0.142264	1	0.354155	Amino Acid	Histidine Metabolism	HMDB00177
3-hydroxyisobutyrate	1549	1119	-0.0269587	0.143239	1	0.354155	Amino Acid	Leucine, Isoleucine and Valine Metabolism	HMDB00336
palmitoyl-linoleoyl-glycerol (16:0/18:2) [2]*	52634	1111	0.0440006	0.143528	1	0.354155	Lipid	Diacylglycerol	HMDB07103
pentadecanoate (15:0)	1361	1120	-0.0213407	0.143627	1	0.354155	Lipid	Long Chain Fatty Acid	HMDB00826
alpha-ketoglutarate	528	1120	0.0243945	0.146603	1	0.360319	Energy	TCA Cycle	HMDB00208
1,5-anhydroglucitol (1,5-AG)	20675	1120	0.0266776	0.150177	1	0.36791	Carbohydrate	Glycolysis, Gluconeogenesis, and Pyruvate Metabolism	HMDB02712
N-palmitoyl-sphingosine (d18:1/16:0)	44877	1120	0.0162055	0.153953	1	0.375943	Lipid	Ceramides	HMDB04949
1-methylurate	34395	898	0.0603456	0.158286	1	0.385281	Xenobiotics	Xanthine Metabolism	HMDB03099
homoarginine	22137	1120	-0.0239388	0.160423	1	0.389233	Amino Acid	Urea cycle; Arginine and Proline Metabolism	HMDB00670
1-methylhistidine	30460	1115	-0.0284353	0.164075	1	0.396821	Amino Acid	Histidine Metabolism	HMDB00001
pregnanolone/allopregnanolone sulfate	48394	341	-0.124559	0.167054	1	0.40274	Lipid	Progestin Steroids	NA
sphinganine	17769	901	0.0320592	0.168859	1	0.405797	Lipid	Sphingolipid Metabolism	HMDB00269
docosadienoate (22:2n6)	32415	1120	0.028487	0.169631	1	0.405904	Lipid	Polyunsaturated Fatty Acid (n3 and n6)	HMDB61714
cortisone	1769	1120	0.0205534	0.169975	1	0.405904	Lipid	Corticosteroids	HMDB02802
gamma-glutamyl-epsilon-lysine	33934	1106	-0.0181079	0.172407	1	0.409952	Peptide	Gamma-glutamyl Amino Acid	HMDB03869
1-linolenoyl-GPC (18:3)*	45951	1120	0.0329415	0.172754	1	0.409952	Lipid	Lysophospholipid	HMDB10388
N4-acetylcytidine	35130	1048	0.0310863	0.173449	1	0.410316	Nucleotide	Pyrimidine Metabolism, Cytidine containing	HMDB05923
caffeic acid sulfate	53254	718	0.0894989	0.175062	1	0.412841	Xenobiotics	Xanthine Metabolism	HMDB41708
alpha-hydroxyisovalerate	33937	1120	0.027006	0.176543	1	0.415041	Amino Acid	Leucine, Isoleucine and Valine Metabolism	HMDB00407
palmitoyl sphingomyelin (d18:1/16:0)	37506	1120	0.00804143	0.177147	1	0.415172	Lipid	Sphingolipid Metabolism	NA
arachidonate (20:4n6)	1110	1120	-0.0225754	0.178801	1	0.417755	Lipid	Polyunsaturated Fatty Acid (n3 and n6)	HMDB01043
androstenediol (3beta,17beta) disulfate (1)	37202	1119	0.0459595	0.180134	1	0.419575	Lipid	Androgenic Steroids	HMDB03818
gulonate*	46957	1118	0.021514	0.181771	1	0.422089	Cofactors and Vitamins	Ascorbate and Aldarate Metabolism	HMDB03290
trans-urocanate	607	1112	-0.0308397	0.182728	1	0.422467	Amino Acid	Histidine Metabolism	HMDB00301
cis-4-decenoylcarnitine (C10:1)	38178	1120	-0.0300136	0.18305	1	0.422467	Lipid	Fatty Acid Metabolism(Acyl Carnitine)	NA
3-hydroxybutyrylcarnitine (2)	52984	1119	0.0345787	0.184782	1	0.425167	Lipid	Fatty Acid Metabolism(Acyl Carnitine)	HMDB13127
N2,N5-diacetylornithine	43591	1088	-0.0372554	0.188168	1	0.431646	Amino Acid	Urea cycle; Arginine and Proline Metabolism	NA
epiandrosterone sulfate	33973	1116	0.0459665	0.188886	1	0.431984	Lipid	Androgenic Steroids	NA
3-(4-hydroxyphenyl)lactate	32197	1120	-0.0195686	0.190725	1	0.434153	Amino Acid	Tyrosine Metabolism	HMDB00755
oleoyl-oleoyl-glycerol (18:1/18:1) [1]*	54945	1074	0.0361829	0.190981	1	0.434153	Lipid	Diacylglycerol	HMDB07218
gamma-glutamyl-alpha-lysine	55015	1120	-0.0132184	0.191628	1	0.434318	Peptide	Gamma-glutamyl Amino Acid	NA
etiocholanolone glucuronide	47112	1086	0.0388808	0.193166	1	0.436497	Lipid	Androgenic Steroids	HMDB04484
1-palmitoyl-2-linoleoyl-GPI (16:0/18:2)	52450	1114	0.0257466	0.195959	1	0.440205	Lipid	Phosphatidylinositol (PI)	HMDB09784
4-acetamidobutanoate	1558	1119	-0.0244894	0.19597	1	0.440205	Amino Acid	Polyamine Metabolism	HMDB03681
phosphate	42109	1120	0.0151647	0.196953	1	0.441106	Energy	Oxidative Phosphorylation	HMDB01429
2-hydroxystearate	17945	1120	-0.0141435	0.198173	1	0.442529	Lipid	Fatty Acid, Monohydroxy	NA
3-aminoisobutyrate	1566	1120	-0.0242487	0.200371	1	0.446121	Nucleotide	Pyrimidine Metabolism, Thymine containing	HMDB03911
N-formylanthranilic acid	43549	1054	-0.0286793	0.20261	1	0.448532	Amino Acid	Tryptophan Metabolism	HMDB04089
1-methylguanidine	48114	606	-0.0424062	0.203126	1	0.448532	Amino Acid	Guanidino and Acetamido Metabolism	HMDB01522
7-alpha-hydroxy-3-oxo-4-cholestenoate (7-Hoca)	36776	1120	0.0173149	0.20445	1	0.448532	Lipid	Sterol	HMDB12458
mannose	48153	1120	0.0127545	0.204934	1	0.448532	Carbohydrate	Fructose, Mannose and Galactose Metabolism	HMDB00169
gamma-tocopherol/beta-tocopherol	52473	1120	0.0326432	0.205059	1	0.448532	Cofactors and Vitamins	Tocopherol Metabolism	NA
N6-acetyllysine	36752	1120	-0.0146681	0.205472	1	0.448532	Amino Acid	Lysine Metabolism	HMDB00206
oleoylcarnitine (C18:1)	35160	1120	0.0177389	0.205602	1	0.448532	Lipid	Fatty Acid Metabolism(Acyl Carnitine)	HMDB05065
4-hydroxy-2-oxoglutaric acid	40062	1093	-0.0399901	0.206529	1	0.44926	Lipid	Fatty Acid, Dicarboxylate	HMDB02070
hydroquinone sulfate	35322	983	0.0509295	0.208108	1	0.450317	Xenobiotics	Drug - Topical Agents	HMDB02434
docosapentaenoate (n3 DPA; 22:5n3)	32504	1120	-0.0337632	0.208205	1	0.450317	Lipid	Polyunsaturated Fatty Acid (n3 and n6)	HMDB06528
cerotoylcarnitine (C26)*	57516	1120	0.018875	0.210329	1	0.453616	Lipid	Fatty Acid Metabolism(Acyl Carnitine)	HMDB06347
N-carbamoylalanine	52340	836	-0.0417264	0.211503	1	0.454851	Amino Acid	Alanine and Aspartate Metabolism	NA
N6,N6,N6-trimethyllysine	1498	1120	-0.0224534	0.21215	1	0.45495	Amino Acid	Lysine Metabolism	HMDB01325
glutarylcarnitine (C5-DC)	44664	1120	-0.0215684	0.213619	1	0.456766	Amino Acid	Lysine Metabolism	HMDB13130
1-palmitoyl-GPC (16:0)	33955	1120	0.010162	0.214203	1	0.456766	Lipid	Lysophospholipid	HMDB10382
dodecanedioate (C12-DC)	32388	1115	0.0345188	0.215633	1	0.458523	Lipid	Fatty Acid, Dicarboxylate	HMDB00623
alliin	41494	920	-0.0777093	0.218005	1	0.462268	Xenobiotics	Food Component/Plant	HMDB33592
9,10-DiHOME	38399	804	0.0332451	0.219982	1	0.463986	Lipid	Fatty Acid, Dihydroxy	HMDB04704
imidazole lactate	15716	1120	-0.0160629	0.220983	1	0.463986	Amino Acid	Histidine Metabolism	HMDB02320
21-hydroxypregnenolone disulfate	46115	1117	0.0354181	0.221518	1	0.463986	Lipid	Pregnenolone Steroids	NA
heneicosapentaenoate (21:5n3)	57658	724	-0.0951349	0.221614	1	0.463986	Lipid	Polyunsaturated Fatty Acid (n3 and n6)	NA
thymol sulfate	36095	1104	-0.0997394	0.22188	1	0.463986	Xenobiotics	Food Component/Plant	HMDB01878
5alpha-androstan-3alpha,17beta-diol monosulfate (1)	37186	987	-0.0418596	0.223938	1	0.467001	Lipid	Androgenic Steroids	NA
2-oxindole-3-acetate	40479	802	-0.0590014	0.224972	1	0.467867	Xenobiotics	Food Component/Plant	HMDB35514
sphingosine	17747	1085	0.0306362	0.226444	1	0.469638	Lipid	Sphingolipid Metabolism	HMDB00252
succinate	1437	1118	-0.0399424	0.233039	1	0.480491	Energy	TCA Cycle	HMDB00254
2-hydroxyphytanate*	61702	1120	-0.028378	0.233124	1	0.480491	Lipid	Fatty Acid, Monohydroxy	NA
7-methylurate	39598	1001	-0.0441016	0.233581	1	0.480491	Xenobiotics	Xanthine Metabolism	HMDB11107
1,3-dimethylurate	32391	1013	-0.0438505	0.23612	1	0.484399	Xenobiotics	Xanthine Metabolism	HMDB01857
glycine conjugate of C10H12O2*	62145	913	-0.0388791	0.237624	1	0.486167	Partially Characterized Molecules	Partially Characterized Molecules	NA
5,6-dihydrothymine	1418	1120	-0.0150922	0.238343	1	0.486322	Nucleotide	Pyrimidine Metabolism, Thymine containing	HMDB00079
tartarate	15336	1037	-0.0466943	0.239013	1	0.486378	Xenobiotics	Food Component/Plant	HMDB00956
ximenoylcarnitine (C26:1)*	57517	1120	0.0173393	0.240573	1	0.487561	Lipid	Fatty Acid Metabolism(Acyl Carnitine)	NA
caprate (10:0)	1642	1120	0.0252029	0.241412	1	0.487561	Lipid	Medium Chain Fatty Acid	HMDB00511
2,3-dihydroxy-2-methylbutyrate	57547	984	-0.0339123	0.241668	1	0.487561	Amino Acid	Leucine, Isoleucine and Valine Metabolism	HMDB29576
ribonate	27731	1120	0.0172895	0.24217	1	0.487561	Carbohydrate	Pentose Metabolism	HMDB00867
7-methylxanthine	34390	1083	0.0506032	0.243827	1	0.488738	Xenobiotics	Xanthine Metabolism	HMDB01991
dihomo-linolenoylcarnitine (20:3n3 or 6)*	57521	1118	0.018286	0.244046	1	0.488738	Lipid	Fatty Acid Metabolism(Acyl Carnitine)	NA
hexadecadienoate (16:2n6)	57652	1120	-0.0292788	0.244778	1	0.48891	Lipid	Polyunsaturated Fatty Acid (n3 and n6)	HMDB00477
hexadecasphingosine (d16:1)*	57428	539	0.0411295	0.245569	1	0.489169	Lipid	Sphingolipid Metabolism	NA
hexadecanedioate (C16-DC)	35678	1120	0.0288362	0.246271	1	0.489169	Lipid	Fatty Acid, Dicarboxylate	HMDB00672
2-linoleoylglycerol (18:2)	32506	833	-0.0330684	0.247122	1	0.489169	Lipid	Monoacylglycerol	HMDB11538
alpha-ketobutyrate	4968	1120	-0.0233997	0.248066	1	0.489169	Amino Acid	Methionine, Cysteine, SAM and Taurine Metabolism	HMDB00005
hexanoylglutamine	54907	1110	0.0436613	0.248139	1	0.489169	Lipid	Fatty Acid Metabolism (Acyl Glutamine)	NA
N-acetylglycine	27710	1120	0.0272193	0.24915	1	0.489888	Amino Acid	Glycine, Serine and Threonine Metabolism	HMDB00532
glyco-alpha-muricholate**	62065	674	0.0532376	0.252022	1	0.494251	Lipid	Primary Bile Acid Metabolism	NA
1-(1-enyl-palmitoyl)-2-oleoyl-GPC (P-16:0/18:1)*	52478	1120	0.0125348	0.257092	1	0.501901	Lipid	Plasmalogen	NA
3-hydroxybutyrate (BHBA)	542	1120	0.0472185	0.257612	1	0.501901	Lipid	Ketone Bodies	HMDB00357
2-palmitoyl-GPC (16:0)*	35253	1120	0.0147533	0.257912	1	0.501901	Lipid	Lysophospholipid	HMDB61702
alpha-CEHC sulfate	47666	812	-0.0668473	0.260834	1	0.506285	Cofactors and Vitamins	Tocopherol Metabolism	NA
N-acetyltyrosine	32390	1077	-0.0226935	0.264743	1	0.512331	Amino Acid	Tyrosine Metabolism	HMDB00866
trimethylamine N-oxide	40406	1120	-0.0325695	0.265302	1	0.512331	Lipid	Phospholipid Metabolism	HMDB00925
androstenediol (3beta,17beta) monosulfate (1)	37211	1115	0.0343674	0.267006	1	0.513255	Lipid	Androgenic Steroids	HMDB03818
hippurate	15753	1120	-0.0443359	0.267691	1	0.513255	Xenobiotics	Benzoate Metabolism	HMDB00714
gamma-glutamylglutamine	2730	1120	-0.0119782	0.267815	1	0.513255	Peptide	Gamma-glutamyl Amino Acid	HMDB11738
salicyluric glucuronide*	33384	806	0.138548	0.269511	1	0.514809	Xenobiotics	Drug - Analgesics, Anesthetics	NA
1-palmitoyl-2-linoleoyl-GPC (16:0/18:2)	42446	1120	0.00680555	0.270554	1	0.514809	Lipid	Phosphatidylcholine (PC)	HMDB07973
quinate	18335	1114	0.0798952	0.270666	1	0.514809	Xenobiotics	Food Component/Plant	HMDB03072
oleoyl ethanolamide	38102	1118	0.021436	0.272356	1	0.51507	Lipid	Endocannabinoid	HMDB02088
1-arachidonoyl-GPI (20:4)*	34214	1120	0.0189179	0.274358	1	0.51507	Lipid	Lysophospholipid	HMDB61690
glycodeoxycholate sulfate	52975	1095	-0.0502304	0.274563	1	0.51507	Lipid	Secondary Bile Acid Metabolism	NA
erythronate*	42420	1120	-0.00953742	0.274854	1	0.51507	Carbohydrate	Aminosugar Metabolism	HMDB00613
acesulfame	48569	699	0.131706	0.274875	1	0.51507	Xenobiotics	Food Component/Plant	HMDB33585
5-dodecenoate (12:1n7)	33968	1120	0.0294885	0.274886	1	0.51507	Lipid	Medium Chain Fatty Acid	HMDB00529
dihomo-linoleoylcarnitine (C20:2)*	57520	1117	0.0194387	0.277171	1	0.517646	Lipid	Fatty Acid Metabolism(Acyl Carnitine)	NA
dehydroisoandrosterone sulfate (DHEA-S)	32425	1119	0.0273969	0.277628	1	0.517646	Lipid	Androgenic Steroids	HMDB01032
3-phenylpropionate (hydrocinnamate)	15749	1019	-0.0553348	0.278623	1	0.518225	Xenobiotics	Benzoate Metabolism	HMDB00764
arachidoylcarnitine (C20)*	57513	1115	0.0184633	0.285185	1	0.527916	Lipid	Fatty Acid Metabolism(Acyl Carnitine)	HMDB06460
oleate/vaccenate (18:1)	52285	1120	0.0201379	0.285228	1	0.527916	Lipid	Long Chain Fatty Acid	NA
gamma-glutamylcitrulline*	62104	1119	-0.0190091	0.287096	1	0.529145	Peptide	Gamma-glutamyl Amino Acid	NA
pregnanediol-3-glucuronide	40708	1090	-0.0396671	0.28729	1	0.529145	Lipid	Progestin Steroids	HMDB10318
ergothioneine	37459	1120	-0.0241905	0.289142	1	0.530598	Xenobiotics	Food Component/Plant	HMDB03045
glyco-beta-muricholate**	62066	999	-0.0535472	0.289481	1	0.530598	Lipid	Primary Bile Acid Metabolism	NA
urate	1604	1120	-0.00986894	0.29128	1	0.532607	Nucleotide	Purine Metabolism, (Hypo)Xanthine/Inosine containing	HMDB00289
1-(1-enyl-palmitoyl)-2-arachidonoyl-GPC (P-16:0/20:4)*	52689	1120	0.0128485	0.292014	1	0.532661	Lipid	Plasmalogen	HMDB11220
2-hydroxyoctanoate	22036	1113	-0.0267847	0.296336	1	0.539246	Lipid	Fatty Acid, Monohydroxy	HMDB02264
N-acetylalanine	1585	1120	-0.00772556	0.297095	1	0.53933	Amino Acid	Alanine and Aspartate Metabolism	HMDB00766
1-(1-enyl-stearoyl)-2-linoleoyl-GPE (P-18:0/18:2)*	52748	1120	0.0164462	0.300745	1	0.544651	Lipid	Plasmalogen	HMDB11376
1-palmitoyl-2-stearoyl-GPC (16:0/18:0)	52616	1118	0.0130234	0.301779	1	0.544997	Lipid	Phosphatidylcholine (PC)	HMDB07970
4-hydroxyhippurate	35527	1120	-0.0350143	0.302376	1	0.544997	Xenobiotics	Benzoate Metabolism	HMDB13678
N-palmitoylglycine	42092	1120	0.0163689	0.304068	1	0.546745	Lipid	Fatty Acid Metabolism(Acyl Glycine)	HMDB13034
glycolithocholate	31912	933	-0.0490986	0.305624	1	0.54824	Lipid	Secondary Bile Acid Metabolism	HMDB00698
lignoceroylcarnitine (C24)*	57515	1120	0.0184165	0.310906	1	0.556397	Lipid	Fatty Acid Metabolism(Acyl Carnitine)	NA
N-trimethyl 5-aminovalerate	57687	1120	0.018022	0.312411	1	0.557771	Amino Acid	Lysine Metabolism	NA
glycerol	15122	1120	0.0200658	0.315115	1	0.561176	Lipid	Glycerolipid Metabolism	HMDB00131
1-(1-enyl-stearoyl)-GPE (P-18:0)*	39271	1120	-0.025166	0.3158	1	0.561176	Lipid	Lysoplasmalogen	NA
solanidine	39788	486	-0.0734183	0.317508	1	0.561699	Xenobiotics	Food Component/Plant	HMDB03236
tauroursodeoxycholate	39378	480	0.0659721	0.317579	1	0.561699	Lipid	Secondary Bile Acid Metabolism	HMDB00874
10-heptadecenoate (17:1n7)	33971	1120	0.0247182	0.326232	1	0.575658	Lipid	Long Chain Fatty Acid	HMDB60038
glycosyl-N-stearoyl-sphingosine (d18:1/18:0)	52234	1119	0.0152519	0.328799	1	0.576068	Lipid	Ceramides	NA
fructose	48195	1120	0.018746	0.329548	1	0.576068	Carbohydrate	Fructose, Mannose and Galactose Metabolism	HMDB00660
myristoleoylcarnitine (C14:1)*	48182	1120	0.0252367	0.330008	1	0.576068	Lipid	Fatty Acid Metabolism(Acyl Carnitine)	NA
3-methylxanthine	32445	1104	-0.0410064	0.33065	1	0.576068	Xenobiotics	Xanthine Metabolism	HMDB01886
pregnen-diol disulfate C21H34O8S2*	32562	1120	0.0316228	0.331946	1	0.576068	Lipid	Pregnenolone Steroids	NA
taurolithocholate 3-sulfate	36850	1115	-0.0427908	0.332051	1	0.576068	Lipid	Secondary Bile Acid Metabolism	HMDB02580
N-methylhydroxyproline**	62068	977	-0.0497524	0.332525	1	0.576068	Amino Acid	Urea cycle; Arginine and Proline Metabolism	NA
ribitol	15772	1114	0.0116921	0.332552	1	0.576068	Carbohydrate	Pentose Metabolism	HMDB00508
dimethylglycine	5086	1120	0.0124644	0.333495	1	0.576383	Amino Acid	Glycine, Serine and Threonine Metabolism	HMDB00092
N-oleoylserine	57664	1063	-0.01898	0.338417	1	0.583558	Lipid	Endocannabinoid	NA
eicosenoylcarnitine (C20:1)*	57519	1120	0.0165446	0.339831	1	0.584664	Lipid	Fatty Acid Metabolism(Acyl Carnitine)	NA
dopamine 3-O-sulfate	48407	1120	0.0239511	0.341665	1	0.586486	Amino Acid	Tyrosine Metabolism	HMDB06275
docosapentaenoate (n6 DPA; 22:5n6)	37478	1062	-0.0187227	0.344081	1	0.589297	Lipid	Polyunsaturated Fatty Acid (n3 and n6)	HMDB01976
linoleoylcarnitine (C18:2)*	46223	1120	-0.0133933	0.345648	1	0.589995	Lipid	Fatty Acid Metabolism(Acyl Carnitine)	HMDB06469
3-methyl-2-oxobutyrate	44526	1120	0.00875207	0.346047	1	0.589995	Amino Acid	Leucine, Isoleucine and Valine Metabolism	HMDB00019
L-urobilin	40173	594	0.0654387	0.352652	1	0.599905	Cofactors and Vitamins	Hemoglobin and Porphyrin Metabolism	HMDB04159
bilirubin (E,E)*	32586	1120	-0.0218048	0.357071	1	0.60606	Cofactors and Vitamins	Hemoglobin and Porphyrin Metabolism	NA
maltotriose	44688	521	-0.0782902	0.359934	1	0.608424	Carbohydrate	Glycogen Metabolism	HMDB01262
beta-guanidinopropanoate	35101	802	0.0421259	0.360071	1	0.608424	Xenobiotics	Food Component/Plant	HMDB13222
1-linoleoyl-GPI (18:2)*	36594	1120	0.0183857	0.367293	1	0.619245	Lipid	Lysophospholipid	NA
myristoleate (14:1n5)	32418	1120	0.0239555	0.369848	1	0.621215	Lipid	Long Chain Fatty Acid	HMDB02000
glycolithocholate sulfate*	32620	1119	-0.0378054	0.370372	1	0.621215	Lipid	Secondary Bile Acid Metabolism	HMDB02639
arabinose	575	1092	0.0184301	0.370923	1	0.621215	Carbohydrate	Pentose Metabolism	HMDB00646
caprylate (8:0)	32492	1082	0.0209137	0.372703	1	0.622817	Lipid	Medium Chain Fatty Acid	HMDB00482
myristoyl-linoleoyl-glycerol (14:0/18:2) [1]*	57407	884	0.0356034	0.380537	1	0.633643	Lipid	Diacylglycerol	NA
4-hydroxyphenylpyruvate	1669	1106	0.016768	0.380856	1	0.633643	Amino Acid	Tyrosine Metabolism	HMDB00707
2'-O-methylcytidine	57554	1120	-0.00905859	0.38322	1	0.634261	Nucleotide	Pyrimidine Metabolism, Cytidine containing	NA
gamma-CEHC glucuronide*	42381	1029	-0.0297593	0.383442	1	0.634261	Cofactors and Vitamins	Tocopherol Metabolism	NA
androsterone sulfate	31591	1117	0.0298505	0.38374	1	0.634261	Lipid	Androgenic Steroids	HMDB02759
3-hydroxyoctanoate	22001	1120	0.0191355	0.388627	1	0.640937	Lipid	Fatty Acid, Monohydroxy	HMDB01954
deoxycholate	1114	1108	-0.0235407	0.389661	1	0.641246	Lipid	Secondary Bile Acid Metabolism	HMDB00626
palmitate (16:0)	1336	1120	0.0122581	0.392128	1	0.642628	Lipid	Long Chain Fatty Acid	HMDB00220
palmitoyl dihydrosphingomyelin (d18:0/16:0)*	52434	1120	-0.00824699	0.392427	1	0.642628	Lipid	Sphingolipid Metabolism	NA
N-acetylglucosaminylasparagine	48149	1077	0.0148658	0.393048	1	0.642628	Carbohydrate	Aminosugar Metabolism	HMDB00489
12,13-DiHOME	38395	958	0.0209048	0.3972	1	0.647201	Lipid	Fatty Acid, Dihydroxy	HMDB04705
N2-acetyllysine	36751	683	0.0376849	0.397554	1	0.647201	Amino Acid	Lysine Metabolism	HMDB00446
2-hydroxyhippurate (salicylurate)	18281	1119	-0.072559	0.400437	1	0.649894	Xenobiotics	Benzoate Metabolism	HMDB00840
arabonate/xylonate	48255	1120	-0.0123056	0.400925	1	0.649894	Carbohydrate	Pentose Metabolism	NA
indolin-2-one	43374	1036	-0.0247522	0.402044	1	0.650315	Xenobiotics	Food Component/Plant	NA
17-methylstearate (i19:0)	38296	1120	0.0150006	0.404921	1	0.653015	Lipid	Fatty Acid, Branched	HMDB37397
3-methylhistidine	15677	1117	-0.0498213	0.405438	1	0.653015	Amino Acid	Histidine Metabolism	HMDB00479
5-methylthioadenosine (MTA)	1419	1120	-0.0104341	0.409404	1	0.658002	Amino Acid	Polyamine Metabolism	HMDB01173
deoxycarnitine	36747	1120	0.0072532	0.410762	1	0.658785	Lipid	Carnitine Metabolism	HMDB01161
ethylmalonate	15765	1120	0.0134727	0.415615	1	0.66516	Amino Acid	Leucine, Isoleucine and Valine Metabolism	HMDB00622
N-acetylarginine	33953	1120	-0.01339	0.417615	1	0.666951	Amino Acid	Urea cycle; Arginine and Proline Metabolism	HMDB04620
beta-citrylglutamate	54923	1120	-0.0131204	0.421342	1	0.671487	Amino Acid	Glutamate Metabolism	NA
4-acetamidophenol	12032	331	-0.139407	0.426078	1	0.677607	Xenobiotics	Drug - Analgesics, Anesthetics	HMDB01859
2-acetamidophenol sulfate	48580	693	-0.0495059	0.430337	1	0.681719	Xenobiotics	Drug - Analgesics, Anesthetics	NA
2-hydroxydecanoate	42489	1120	0.0163673	0.431009	1	0.681719	Lipid	Fatty Acid, Monohydroxy	NA
glycyrrhetinate	39789	346	-0.0761051	0.431365	1	0.681719	Xenobiotics	Food Component/Plant	HMDB11628
vanillactate	54910	1043	0.0195217	0.434456	1	0.685173	Amino Acid	Tyrosine Metabolism	HMDB00913
N-acetylvaline	1591	1120	-0.00775174	0.438977	1	0.689703	Amino Acid	Leucine, Isoleucine and Valine Metabolism	HMDB11757
corticosterone	5983	729	0.0301174	0.440836	1	0.689703	Lipid	Corticosteroids	HMDB01547
choline phosphate	34396	1114	-0.0127782	0.441252	1	0.689703	Lipid	Phospholipid Metabolism	HMDB01565
pyrraline	48428	1065	-0.0234017	0.441523	1	0.689703	Xenobiotics	Food Component/Plant	HMDB33143
2-aminooctanoate	43343	1120	-0.0204322	0.442295	1	0.689703	Lipid	Fatty Acid, Amino	HMDB00991
acetoacetate	33963	917	0.0314722	0.442795	1	0.689703	Lipid	Ketone Bodies	HMDB00060
N-acetylphenylalanine	33950	1112	-0.0133969	0.446245	1	0.691144	Amino Acid	Phenylalanine Metabolism	HMDB00512
1-arachidonoyl-GPC (20:4n6)*	33228	1120	0.0106169	0.446655	1	0.691144	Lipid	Lysophospholipid	HMDB10395
N-acetylmethionine	1589	1120	0.00957903	0.447749	1	0.691144	Amino Acid	Methionine, Cysteine, SAM and Taurine Metabolism	HMDB11745
S-allylcysteine	43239	1047	0.0466356	0.44777	1	0.691144	Xenobiotics	Food Component/Plant	HMDB34323
N-acetylkynurenine (2)	48757	795	0.0271066	0.448285	1	0.691144	Amino Acid	Tryptophan Metabolism	NA
eicosanodioate (C20-DC)	39831	1120	-0.0169887	0.449522	1	0.691642	Lipid	Fatty Acid, Dicarboxylate	NA
palmitoyl-linoleoyl-glycerol (16:0/18:2) [1]*	52633	1077	0.0256154	0.450457	1	0.691675	Lipid	Diacylglycerol	HMDB07103
N-stearoyl-sphingadienine (d18:2/18:0)*	57417	1039	-0.0187337	0.451614	1	0.692049	Lipid	Ceramides	NA
benzoate	15778	1092	0.0147125	0.453103	1	0.692927	Xenobiotics	Benzoate Metabolism	HMDB01870
3-hydroxydecanoate	22053	1120	0.0174357	0.455141	1	0.693976	Lipid	Fatty Acid, Monohydroxy	HMDB02203
N-acetylalliin	45404	974	-0.0419143	0.455622	1	0.693976	Xenobiotics	Food Component/Plant	NA
3-hydroxystachydrine*	62062	1004	-0.0610976	0.458282	1	0.695265	Xenobiotics	Food Component/Plant	NA
sphingomyelin (d17:1/14:0, d16:1/15:0)*	62152	1120	-0.0124035	0.458305	1	0.695265	Lipid	Sphingolipid Metabolism	NA
cysteine	1868	1120	-0.0107192	0.459266	1	0.695328	Amino Acid	Methionine, Cysteine, SAM and Taurine Metabolism	HMDB00574
2-hydroxybutyrate/2-hydroxyisobutyrate	52281	1120	-0.0135627	0.461441	1	0.696628	Amino Acid	Glutathione Metabolism	NA
glycocholate glucuronide (1)	52977	702	-0.049137	0.461965	1	0.696628	Lipid	Primary Bile Acid Metabolism	NA
laurate (12:0)	1645	1120	0.0167615	0.463604	1	0.697711	Lipid	Medium Chain Fatty Acid	HMDB00638
gamma-glutamyltryptophan	33947	935	-0.012624	0.4679	1	0.701108	Peptide	Gamma-glutamyl Amino Acid	HMDB29160
1-palmitoyl-2-docosahexaenoyl-GPE (16:0/22:6)*	52465	1120	0.0177478	0.468279	1	0.701108	Lipid	Phosphatidylethanolamine (PE)	HMDB05324
1-(1-enyl-oleoyl)-GPE (P-18:1)*	44621	1111	-0.0176449	0.468985	1	0.701108	Lipid	Lysoplasmalogen	NA
3,4-methyleneheptanoate	53026	982	-0.0257867	0.469671	1	0.701108	Xenobiotics	Food Component/Plant	NA
I-urobilinogen	32426	499	-0.0501829	0.470493	1	0.701108	Cofactors and Vitamins	Hemoglobin and Porphyrin Metabolism	HMDB04157
sphingomyelin (d18:1/22:1, d18:2/22:0, d16:1/24:1)*	48493	1120	-0.00551548	0.471754	1	0.701336	Lipid	Sphingolipid Metabolism	HMDB12104
dihomo-linolenate (20:3n3 or n6)	35718	1120	-0.0125113	0.472499	1	0.701336	Lipid	Polyunsaturated Fatty Acid (n3 and n6)	HMDB02925
glycosyl ceramide (d18:1/20:0, d16:1/22:0)*	57595	1120	0.00934115	0.474377	1	0.702747	Lipid	Ceramides	NA
N-acetylasparagine	33942	1120	-0.0125816	0.477527	1	0.704879	Amino Acid	Alanine and Aspartate Metabolism	HMDB06028
3-methyl-2-oxovalerate	15676	1120	0.0075145	0.477679	1	0.704879	Amino Acid	Leucine, Isoleucine and Valine Metabolism	HMDB03736
N-acetyl-3-methylhistidine*	43256	955	-0.0352533	0.479373	1	0.706003	Amino Acid	Histidine Metabolism	NA
2-aminophenol sulfate	43266	1111	-0.0350648	0.480731	1	0.70636	Xenobiotics	Chemical	HMDB61116
linolenate [alpha or gamma; (18:3n3 or 6)]	34035	1120	-0.0182547	0.481762	1	0.70636	Lipid	Polyunsaturated Fatty Acid (n3 and n6)	HMDB03073
xanthurenate	15679	1086	-0.021412	0.482415	1	0.70636	Amino Acid	Tryptophan Metabolism	HMDB00881
dimethyl sulfoxide (DMSO)	48404	1068	-0.0158994	0.485986	1	0.710214	Xenobiotics	Chemical	HMDB02151
cysteinylglycine	35637	1112	-0.0173999	0.489276	1	0.713645	Amino Acid	Glutathione Metabolism	HMDB00078
1-stearoyl-2-linoleoyl-GPI (18:0/18:2)	52468	1120	0.0113057	0.491417	1	0.714594	Lipid	Phosphatidylinositol (PI)	HMDB09809
cys-gly, oxidized	18368	1078	-0.0135314	0.491892	1	0.714594	Amino Acid	Glutathione Metabolism	NA
arginine	1638	1120	0.00632049	0.492875	1	0.714594	Amino Acid	Urea cycle; Arginine and Proline Metabolism	HMDB00517
2-piperidinone	43400	1120	0.0294181	0.493702	1	0.714594	Xenobiotics	Food Component/Plant	HMDB11749
salicylate	1515	1120	-0.0535922	0.495765	1	0.71506	Xenobiotics	Drug - Topical Agents	HMDB01895
gamma-glutamylisoleucine*	34457	1118	-0.0120004	0.495914	1	0.71506	Peptide	Gamma-glutamyl Amino Acid	HMDB11170
methylsuccinate	15745	1107	0.0111389	0.497811	1	0.716432	Amino Acid	Leucine, Isoleucine and Valine Metabolism	HMDB01844
malate	1303	1120	-0.00646265	0.499506	1	0.71665	Energy	TCA Cycle	HMDB00156
docosadioate (C22-DC)	39837	1117	-0.0152064	0.499856	1	0.71665	Lipid	Fatty Acid, Dicarboxylate	NA
sphingomyelin (d18:1/14:0, d16:1/16:0)*	42463	1120	0.00582514	0.502289	1	0.718776	Lipid	Sphingolipid Metabolism	HMDB12097
myristoylcarnitine (C14)	33952	1120	0.0123132	0.50497	1	0.721249	Lipid	Fatty Acid Metabolism(Acyl Carnitine)	HMDB05066
galactonate	27719	1018	0.0297253	0.50641	1	0.721945	Carbohydrate	Fructose, Mannose and Galactose Metabolism	HMDB00565
1-linoleoyl-GPA (18:2)*	52690	946	0.0169068	0.509361	1	0.724083	Lipid	Lysophospholipid	HMDB07856
[truncated: 225 more rows]

## Sheet: Supplemental Table 8
Supplemental Table 8. The sensitivity results of the association tests between each plasma metabolite and smoking.
[truncated: 758 more rows]

[truncated: 10 more sheets: Supplemental Table 9, Supplemental Table 10, Supplemental Table 11, Supplemental Table 12, Supplemental Table 13, Supplemental Table 14, Supplemental Table 15, Supplemental Table 16, Supplemental Table 17, Supplemental Table 18]
